# Supplementary material for: Synthesis of amidines via iron-catalyzed dearomative amination of β-naphthols with oxadiazolones
Source: Royal Society of Chemistry journal article supplement (doi:10.1039/d1qo01687c), 2021-11-30

# Synthesis of amidines via iron-catalyzed dearomative amination of $\beta$ -naphthols with oxadiazolones

Yan-Hui Fan,<sup>†</sup> Xiao-Yu Guan,<sup>†</sup> Wen-Pei Li, Cheng-Zhou Lin, De-Xian Bing, Mei-Zhi Sun, Guo Cheng, Jing Cao,\* Jun-Jie Chen and Qing-Hai Deng\*

*The Education Ministry Key Lab of Resource Chemistry, Joint International Research Laboratory of Resource Chemistry, Ministry of Education, Shanghai Key Laboratory of Rare Earth Functional Materials, and Shanghai Frontiers Science Center of Biomimetic Catalysis, College of Chemistry and Materials Science, Shanghai Normal University, Shanghai 200234, China.*

*E-mail: [qinghaideng@shnu.edu.cn](mailto:qinghaideng@shnu.edu.cn)*

<sup>†</sup> Y.-H. F. and X.-Y. G. contributed equally.

## **Supporting Information**

### **Table of Contents:**

#### **I. General Information**

#### **II. Preparation of the Substrates**

#### **III. Optimization of Reaction Conditions**

#### **IV. General Procedure for Catalytic Reaction**

#### **V. Further Transformations**

#### **VI. Mechanistic Experiments**

#### **VII. Crystallographic Data**

#### **VIII. References**

#### **IX. NMR Spectra of New Compounds (<sup>1</sup>H NMR, <sup>13</sup>C NMR)**

## I. General Information

All manipulations were maintained under an atmosphere of nitrogen unless otherwise stated. Commercially available reagents were used without further purification. Solvents were pre-dried over activated 4 Å molecular sieves and were refluxed over sodium-benzophenone (toluene, tetrahydrofuran), phosphorus pentoxide (chloroform) or calcium hydride (dichloromethane, dichloroethane, acetonitrile) under an nitrogen atmosphere and collected by distillation. Column chromatography was performed on silica gel (200-300 mesh). <sup>1</sup>H NMR spectra were recorded on a 400 MHz NMR spectrometer and <sup>13</sup>C NMR spectra were recorded on a 101 MHz NMR spectrometer. Infrared spectra were prepared as KBr pellets and were recorded on a Varian Excalibur 3100 series FT-IR spectrometer. Mass spectra were recorded by the mass spectrometry service of Shanghai Institute of Organic Chemistry.

## II. Preparation of the Substrates

**1a**<sup>[1]</sup>, **1b**<sup>[1]</sup>, **1c**<sup>[1]</sup>, **1e**<sup>[1]</sup>, **1f**<sup>[1]</sup>, **1g**<sup>[1]</sup>, **1h**<sup>[1]</sup>, **1j**<sup>[1]</sup>, **1l**<sup>[1]</sup>, **1m**<sup>[1]</sup>, **1o**<sup>[2]</sup>, **1d**<sup>[2]</sup>, **1i**<sup>[2]</sup>, **1k**<sup>[2]</sup> and **1n**<sup>[2]</sup> were prepared according to the published procedures. The synthesis of substituted oxadiazolones **2** was accomplished following the reported procedures.<sup>[3, 4, 5, 6]</sup>

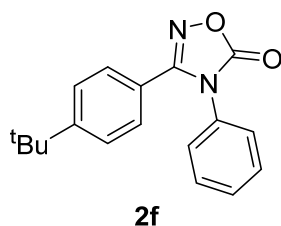

**3-(4-(tert-butyl)phenyl)-4-phenyl-1,2,4-oxadiazol-5(4H)-one (2f)**; white solid; <sup>1</sup>H NMR (400 MHz, Chloroform-*d*) δ 7.45 – 7.42 (m, 3H), 7.35 – 7.32 (m, 2H), 7.27 – 7.21 (m, 4H), 1.26 (s, 9H); <sup>13</sup>C{<sup>1</sup>H} NMR (101 MHz, Chloroform-*d*) δ 158.4, 157.4, 155.5, 132.1, 129.8, 129.5, 127.8, 127.0, 125.9, 120.0, 35.0, 31.0; HRMS (ESI, *m/z*): calcd for C<sub>18</sub>H<sub>19</sub>N<sub>2</sub>O<sub>2</sub><sup>+</sup> [M+H]<sup>+</sup>: 295.1441; found: 295.1446.

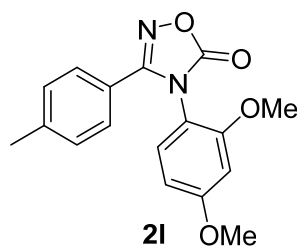

**4-(2,4-dimethoxyphenyl)-3-(p-tolyl)-1,2,4-oxadiazol-5(4H)-one (21)**; white solid;  $^1\text{H}$  NMR (400 MHz, Chloroform-*d*)  $\delta$  7.27 (d,  $J = 8.0$  Hz, 2H), 7.21 (d,  $J = 8.8$  Hz, 1H), 7.13 (d,  $J = 7.6$ Hz, 2H), 6.54 (dt,  $J = 8.8, 2$  Hz, 1H), 6.47 (s, 1H), 3.82 (s, 3H), 3.61 (s, 3H), 2.33 (s, 3H);  $^{13}\text{C}\{^1\text{H}\}$  NMR (101 MHz, Chloroform-*d*)  $\delta$  162.2, 158.9, 158.6, 156.0, 142.0, 129.9, 129.4, 127.2, 120.9, 113.5, 105.3, 99.7, 55.7, 55.6, 21.4; HRMS (ESI,  $m/z$ ): calcd for  $\text{C}_{17}\text{H}_{17}\text{N}_2\text{O}_4^+$   $[\text{M}+\text{H}]^+$ : 313.1183; found: 313.1180.

### III. Optimization of Reaction Conditions

**Table S1.** Optimization of the Reaction Conditions (Metal Salts) for the Synthesis of Product **3aa**

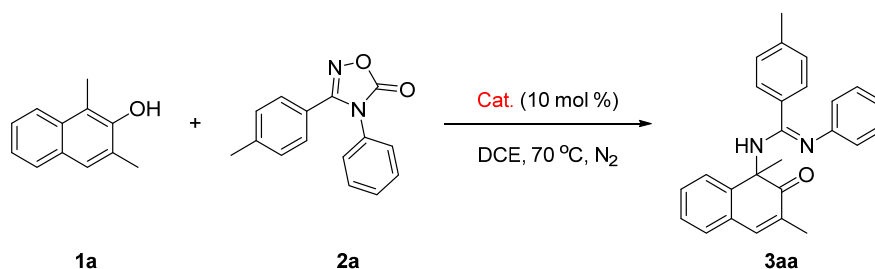

| Entry | catalyst                                    | Time (h) | yield <sup>b</sup> (%) |
|-------|---------------------------------------------|----------|------------------------|
| 1     | $\text{FeCl}_2$                             | 16       | 62                     |
| 2     | $\text{Cu}(\text{OTf})_2$                   | 16       | NR <sup>c</sup>        |
| 3     | $[\text{Ru}(\text{p-Cymene})\text{Cl}_2]_2$ | 16       | NR <sup>c</sup>        |
| 4     | $\text{CoCl}_2$                             | 16       | NR <sup>c</sup>        |
| 5     | $\text{Ni}(\text{OAc})_2$                   | 16       | NR <sup>c</sup>        |
| 6     | $[\text{Rh}(1,5\text{-cod})\text{Cl}]_2$    | 16       | NR <sup>c</sup>        |
| 7     | $[\text{IrCp}^*\text{Cl}_2]_2$              | 16       | trace                  |
| 8     | $\text{Pd}(\text{OAc})_2$                   | 16       | NR <sup>c</sup>        |
| 9     | $\text{Zn}(\text{OTf})_2$                   | 16       | NR <sup>c</sup>        |

|    |                                                      |    |                 |
|----|------------------------------------------------------|----|-----------------|
| 10 | Mn(OTf) <sub>2</sub>                                 | 16 | NR <sup>c</sup> |
| 11 | FeBr <sub>2</sub>                                    | 16 | 50              |
| 12 | FeF <sub>2</sub>                                     | 16 | trace           |
| 13 | FeI <sub>2</sub>                                     | 16 | 28              |
| 14 | Fe(ClO <sub>4</sub> ) <sub>2</sub> •H <sub>2</sub> O | 16 | 16              |
| 15 | Fe(OAc) <sub>2</sub>                                 | 16 | NR <sup>c</sup> |
| 16 | FeCl <sub>3</sub>                                    | 16 | 29              |
| 17 | FeF <sub>3</sub>                                     | 16 | 20              |
| 18 | FeBr <sub>3</sub>                                    | 16 | 18              |
| 19 | Fe(OTf) <sub>3</sub>                                 | 16 | NR <sup>c</sup> |

<sup>a</sup> Reaction condition: **1a** (0.2 mmol), **2a** (1.1 equiv), Cat. (10 mol %), DCE (3mL), 70 °C, N<sub>2</sub> atmosphere. <sup>b</sup> Isolated yield. <sup>c</sup> No Reaction. DCE = 1,2dichloroethane.

**Table S2.** Optimization of the Reaction Conditions (solvent, temperature and time) for the Synthesis of Product **3aa**

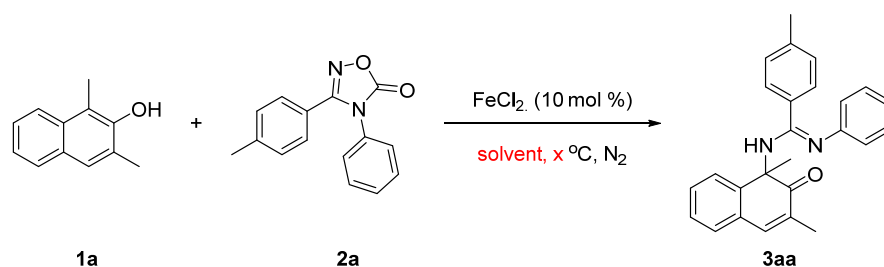

| Entry | solvent           | Temp (°C) | Time (h) | yield <sup>b</sup> (%) |
|-------|-------------------|-----------|----------|------------------------|
| 1     | DCM               | 50        | 16       | 62                     |
| 2     | MeCN              | 70        | 16       | 34                     |
| 3     | PhCl              | 70        | 16       | 49                     |
| 4     | CHCl <sub>3</sub> | 60        | 16       | 31                     |
| 5     | CCl <sub>4</sub>  | 70        | 16       | NR <sup>c</sup>        |
| 6     | Toluene           | 70        | 16       | 45                     |
| 7     | 1,4-Dioxane       | 70        | 16       | trace                  |
| 8     | DCM               | 40        | 16       | 12                     |
| 9     | DCM               | rt        | 16       | NR <sup>c</sup>        |

|           |            |           |           |           |
|-----------|------------|-----------|-----------|-----------|
| 10        | DCM        | 50        | 36        | 63        |
| <b>11</b> | <b>DCM</b> | <b>50</b> | <b>48</b> | <b>65</b> |

<sup>a</sup> Reaction condition: **1a** (0.2 mmol), **2a** (1.1 equiv), FeCl<sub>2</sub> (10 mol%), solvent (3 mL), N<sub>2</sub> atmosphere. <sup>b</sup> Isolated yield. <sup>c</sup> No Reaction. DCM= Dichloromethane.

**Table S3.** Optimization of the Reaction Conditions (additive or base) for the Synthesis of Product **3aa**

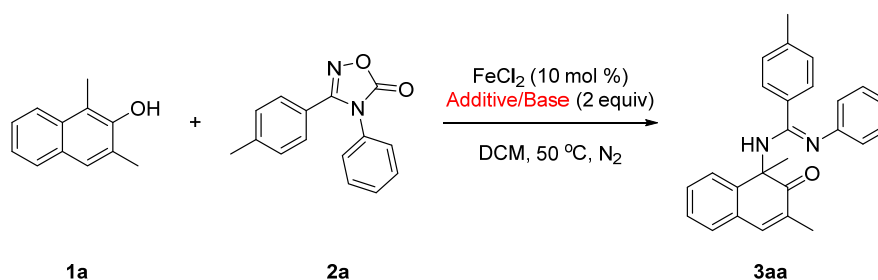

| Entry                   | solvent    | Additive/base                  | Time (h)  | yield <sup>b</sup> (%) |
|-------------------------|------------|--------------------------------|-----------|------------------------|
| 1                       | DCM        | Bu <sub>4</sub> NCl            | 48        | 74                     |
| 2                       | DCM        | Bu <sub>4</sub> NBr            | 48        | 78                     |
| 3                       | DCM        | Bu <sub>4</sub> NI             | 48        | 76                     |
| 4                       | DCM        | LiCl                           | 48        | 22                     |
| 5                       | DCM        | LiBr                           | 48        | 23                     |
| 6                       | DCM        | KBr                            | 48        | 21                     |
| 7                       | DCM        | NaI                            | 48        | trace                  |
| 8                       | DCM        | K <sub>2</sub> CO <sub>3</sub> | 48        | 64                     |
| 9                       | DCM        | CsCO <sub>3</sub>              | 48        | 62                     |
| 10 <sup>c</sup>         | DCM        | Bu <sub>4</sub> NBr            | 48        | 92                     |
| 11 <sup>c,d</sup>       | DCM        | Bu <sub>4</sub> NBr            | 48        | 60                     |
| 12 <sup>c,e</sup>       | DCM        | Bu <sub>4</sub> NBr            | 48        | 76                     |
| <b>13<sup>c,f</sup></b> | <b>DCM</b> | <b>Bu<sub>4</sub>NBr</b>       | <b>48</b> | <b>92</b>              |
| 14 <sup>g,f</sup>       | DCM        | Bu <sub>4</sub> NBr            | 48        | 85                     |

<sup>a</sup> Reaction condition: **1a** (0.2 mmol), **2a** (1.1 equiv), FeCl<sub>2</sub> (10 mol %), solvent (3 mL), N<sub>2</sub> atmosphere. <sup>b</sup> Isolated yield. <sup>c</sup> 15 mol % of FeCl<sub>2</sub> was used. <sup>d</sup> 4 equiv of Bu<sub>4</sub>NBr was used. <sup>e</sup> 10 mol % of Bu<sub>4</sub>NBr was used. <sup>f</sup> 1.5 equiv of Bu<sub>4</sub>NBr was used. <sup>g</sup> 12 mol % of FeCl<sub>2</sub> was used.

#### IV. General Procedure for Catalytic Reaction.

### General Procedure:

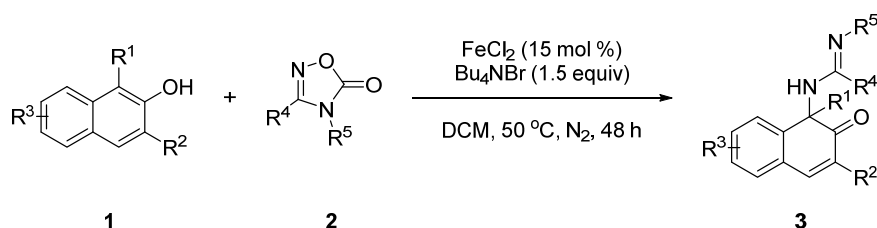

To a 20 mL over-dried and sealed flask were added **1** (0.2 mmol), **2** (0.22 mmol), FeCl<sub>2</sub> (15 mol %, 0.03 mmol), <sup>n</sup>Bu<sub>4</sub>NBr (0.3 mmol) and anhydrous CH<sub>2</sub>Cl<sub>2</sub> (3 mL) under N<sub>2</sub> atmosphere. The mixture was stirred at 50 °C for 48 hours as monitoring by TLC. Upon completion, the crude product was purified by column chromatography via silica gel to afford the desired product **3**.

### The procedure for gram Scale:

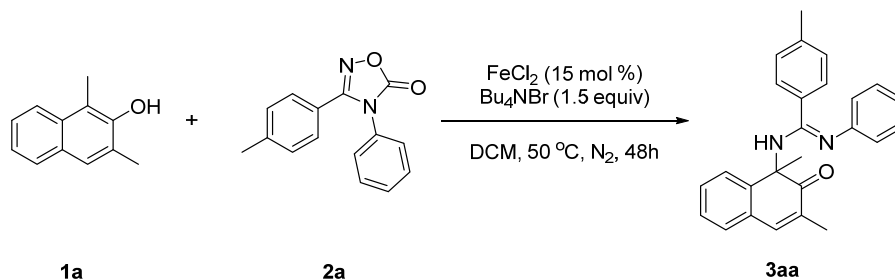

To a 100 mL over-dried and sealed flask were added **1a** (3.5 mmol), **2a** (3.9 mmol), FeCl<sub>2</sub> (15 mol %, 67 mg), <sup>n</sup>Bu<sub>4</sub>NBr (5.3 mmol) and anhydrous CH<sub>2</sub>Cl<sub>2</sub> (50 mL) under N<sub>2</sub> atmosphere. The solution was stirred at 50 °C for 48 hours as monitoring by TLC. Upon completion, the crude product was purified by column chromatography via silica gel to afford the desired product **3aa** (2.9 mmol, 1.10 g, 83% yield).

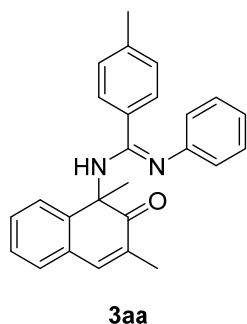

**(E)-N-(1,3-dimethyl-2-oxo-1,2-dihydronaphthalen-1-yl)-4-methyl-N'-phenylbenzimidamide (3aa)**; reaction temperature: 50 °C; reaction time: 48 h; petroleum ether/ethylacetate = 15:1; TLC: R<sub>f</sub> = 0.2 (PE/EA=10 : 1, UV); white solid

(m.p.: 293-295 °C); 92% yield (70 mg, 0.19 mmol); **<sup>1</sup>H NMR (400 MHz, Chloroform-*d*)** δ 7.67 (d, *J* = 8.0 Hz, 1H), 7.35-7.31 (m, 1H), 7.21 (d, *J* = 4.4 Hz, 3H), 7.16 (d, *J* = 8.0 Hz, 2H), 7.03 (d, *J* = 7.6 Hz, 2H), 6.88 (t, *J* = 7.6 Hz, 2H), 6.69 (t, *J* = 7.2 Hz, 1H), 6.17 (d, *J* = 8.0 Hz, 2H), 5.52 (br, 1H), 2.28 (s, 3H), 2.10 (s, 3H), 1.44 (s, 3H). **<sup>13</sup>C{<sup>1</sup>H} NMR (101 MHz, Chloroform-*d*)** δ 200.7, 153.6, 149.7, 146.2, 140.2, 139.5, 132.4, 130.9, 130.2, 129.0, 128.7, 128.6, 128.4, 128.1, 126.6, 123.9, 122.3, 121.3, 61.8, 29.1, 21.5, 16.2. **IR ν (neat, cm<sup>-1</sup>):** 3297, 2920, 2848, 2360, 1624, 1594, 1489, 823; **HRMS (ESI, m/z):** calcd for C<sub>26</sub>H<sub>25</sub>N<sub>2</sub>O<sup>+</sup> [M+H]<sup>+</sup>: 381.1961; found: 381.1961.

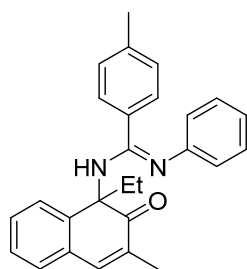

**3ba**

**(*E*)-*N*-(1-ethyl-3-methyl-2-oxo-1,2-dihydronaphthalen-1-yl)-4-methyl-*N'*-phenylbenzimidamide (3ba)**; reaction temperature: 50 °C; reaction time: 48 h; petroleum ether/ethylacetate = 15:1; **TLC:** *R<sub>f</sub>* = 0.2 (PE/EA=10 : 1, UV); white solid (m.p.: 301-303 °C); 91% yield (72 mg, 0.18 mmol); **<sup>1</sup>H NMR (400 MHz, Chloroform-*d*)** δ 7.62 (d, *J* = 7.6 Hz, 1H), 7.33 (t, *J* = 7.6 Hz, 1H), 7.24 – 7.14 (m, 5H), 7.03 (d, *J* = 7.6 Hz, 2H), 6.88 (t, *J* = 7.6 Hz, 2H), 6.68 (t, *J* = 7.6 Hz, 1H), 6.16 (d, *J* = 7.6 Hz, 2H), 5.47 (s, 1H), 2.28 (s, 3H), 2.08 (s, 3H), 2.02 – 1.93 (m, 1H), 1.90 – 1.80 (m, 1H), 0.63 (t, *J* = 7.2 Hz, 3H); **<sup>13</sup>C{<sup>1</sup>H} NMR (101 MHz, Chloroform-*d*)** δ 201.0, 153.5, 149.7, 144.4, 140.2, 139.4, 134.0, 131.8, 131.0, 129.0, 128.6, 128.4, 128.08, 128.05, 126.6, 124.5, 122.3, 121.2, 64.9, 36.7, 21.5, 16.0, 7.4; **IR ν (neat, cm<sup>-1</sup>):** 3321, 2920, 2357, 2334, 1654, 1592, 1499, 502; **HRMS (ESI, m/z):** calcd for C<sub>27</sub>H<sub>27</sub>N<sub>2</sub>O<sup>+</sup> [M+H]<sup>+</sup>: 395.2118; found: 395.2117.

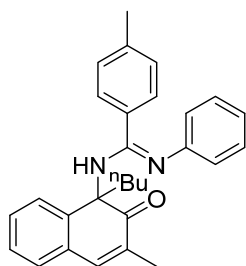

**3ca**

**(E)-N-(1-butyl-3-methyl-2-oxo-1,2-dihydronaphthalen-1-yl)-4-methyl-N'-phenylbenzimidamide (3ca)**; reaction temperature: 50 °C; reaction time: 48 h; petroleum ether/ethylacetate = 15:1; **TLC**:  $R_f$  = 0.2 (PE/EAc=10 : 1, UV); white solid (m.p.: 286-289 °C); 89% yield (75 mg, 0.18 mmol);  **$^1\text{H NMR}$  (400 MHz, Chloroform-*d*)**  $\delta$  7.62 (d,  $J$  = 7.6 Hz, 1H), 7.33 (t,  $J$  = 6.8 Hz, 1H), 7.23 – 7.13(m, 5H), 7.02 (d,  $J$  = 8.0 Hz, 2H), 6.87 (t,  $J$  = 7.6 Hz, 2H), 6.68 (t,  $J$  = 7.6 Hz, 1H), 6.15 (d,  $J$  = 7.6Hz, 2H), 5.47 (br, 1H), 2.28 (s, 3H), 2.08 (s, 3H), 1.92 (td,  $J$  = 12.4, 4.4 Hz, 1H), 1.78 (td,  $J$  = 12, 4.8 Hz, 1H), 1.18 - 1.01 (m, 3H), 0.96 – 0.86 (m, 1H), 0.74 (t,  $J$  = 6.4 Hz, 3H);  **$^{13}\text{C}\{^1\text{H}\}$  NMR (101 MHz, Chloroform-*d*)**  $\delta$  201.0, 153.4, 149.7, 144.8, 140.0, 139.4, 133.8, 131.7, 131.0, 129.0, 128.6, 128.4, 128.1, 126.6, 124.4, 122.3, 121.2, 64.5, 43.5, 24.6, 23.0, 21.5, 16.1, 13.9; **IR  $\nu$  (neat,  $\text{cm}^{-1}$ )**: 3317, 2955, 2920, 2860, 2334, 1657, 1594, 1512, 1275, 827, 696, 587, 509; **HRMS (ESI,  $m/z$ )**: calcd for  $\text{C}_{29}\text{H}_{31}\text{N}_2\text{O}^+$   $[\text{M}+\text{H}]^+$ : 423.2431; found: 423.2430.

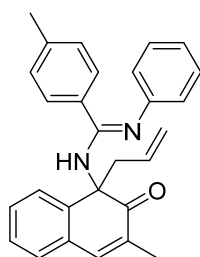

**3da**

**(E)-N-(1-allyl-3-methyl-2-oxo-1,2-dihydronaphthalen-1-yl)-4-methyl-N'-phenylbenzimidamide (3da)**; reaction temperature: 50 °C; reaction time: 48 h; petroleum ether/ethylacetate = 15:1; **TLC**:  $R_f$  = 0.2 (PE/EAc=10 : 1, UV); white solid (m.p.: 275-277 °C); 87% yield (71 mg, 0.18 mmol);  **$^1\text{H NMR}$  (400 MHz, Chloroform-*d*)**  $\delta$  7.63 (d,  $J$  = 8.0 Hz, 1H), 7.33 (td,  $J$  = 6.8, 2.0 Hz, 1H), 7.24 – 7.15(m, 5H), 7.03



(d,  $J = 8.0$  Hz, 2H), 6.88 (t,  $J = 7.6$  Hz, 2H), 6.68 (t,  $J = 7.2$  Hz, 1H), 6.17 (d,  $J = 7.6$  Hz, 2H), 5.59–5.48 (m, 2H), 5.06 (s, 1H), 5.02 (d,  $J = 8.0$  Hz, 1H), 2.52 (d,  $J = 7.2$  Hz, 2H), 2.29 (s, 3H), 2.07 (s, 3H);  $^{13}\text{C}\{^1\text{H}\}$  NMR (101 MHz, Chloroform-*d*)  $\delta$  200.0, 153.4, 149.7, 144.4, 140.2, 139.4, 133.2, 131.04, 131.00, 129.0, 128.6, 128.4, 128.3, 128.1, 126.7, 124.5, 122.2, 121.3, 120.1, 64.4, 46.4, 21.5, 16.1; IR  $\nu$  (neat,  $\text{cm}^{-1}$ ): 3347, 2915, 2848, 2364, 2342, 1656, 1630, 1591, 1482, 818, 665; HRMS (ESI,  $m/z$ ): calcd for  $\text{C}_{28}\text{H}_{27}\text{N}_2\text{O}^+$   $[\text{M}+\text{H}]^+$ : 407.2118; found: 407.2117.

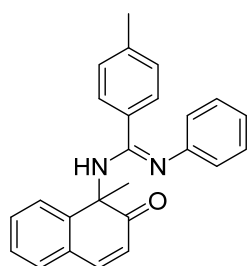

**3ea**

**(*E*)-4-methyl-*N*-(1-methyl-2-oxo-1,2-dihydronaphthalen-1-yl)-*N'*-phenylbenzimidamide (3ea)**; reaction temperature: 50 °C; reaction time: 48 h; petroleum ether/ethylacetate = 5:1; TLC:  $R_f = 0.4$  (PE/EA=2 : 1, UV); white solid (m.p.: 298-301 °C); 53% yield (39 mg, 0.11 mmol);  $^1\text{H}$  NMR (400 MHz, Chloroform-*d*)  $\delta$  7.75 (d,  $J = 7.6$  Hz, 1H), 7.42 – 7.37 (m, 1H), 7.26 – 7.19 (m, 5H), 7.03 (d,  $J = 7.6$  Hz, 2H), 6.94 (t,  $J = 7.6$  Hz, 2H), 6.80 – 6.76 (m, 1H), 6.35 (s, 2H), 6.22 (s, 1H), 2.28 (s, 3H), 1.50 (s, 3H);  $^{13}\text{C}\{^1\text{H}\}$  NMR (101 MHz, Chloroform-*d*)  $\delta$  200.7, 155.0, 146.3, 141.7, 139.8, 129.8, 129.7, 129.0, 128.8, 128.2, 126.8, 125.2, 124.8, 123.2, 122.2, 63.6, 27.8, 21.5; IR  $\nu$  (neat,  $\text{cm}^{-1}$ ): 3295, 2922, 2850, 2359, 1666, 1592, 1482, 823; HRMS (ESI,  $m/z$ ): calcd for  $\text{C}_{25}\text{H}_{23}\text{N}_2\text{O}^+$   $[\text{M}+\text{H}]^+$ : 367.1805; found: 367.1804.

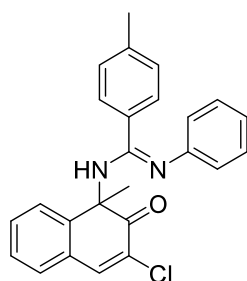

**3fa**

**(*E*)-*N*-(3-chloro-1-methyl-2-oxo-1,2-dihydronaphthalen-1-yl)-4-methyl-*N'*-phenylbenzimidamide (3fa)**; reaction temperature: 50 °C; reaction time: 48 h;

petroleum ether/ethylacetate = 15:1; **TLC**:  $R_f$  = 0.2 (PE/EA=10 : 1, UV); yellow solid (m.p.: 316-318 °C); 88% yield (71 mg, 0.18 mmol); **<sup>1</sup>H NMR (400 MHz, Chloroform-*d*)**  $\delta$  7.73 (d,  $J$  = 8.0 Hz, 1H), 7.54 (s, 1H), 7.41 (td,  $J$  = 6.8, 2 Hz, 1H), 7.25 – 7.21(m, 2H), 7.16 (d,  $J$  = 8.0 Hz, 2H), 7.03 (d,  $J$  = 8.0 Hz, 2H), 6.93 (t,  $J$  = 7.6 Hz, 2H), 6.76 (t, 7.2 Hz, 1H), 6.28 (d,  $J$  = 7.6Hz, 2H), 5.58 (br, 1H), 2.29 (s, 3H), 1.52 (s, 3H); **<sup>13</sup>C{<sup>1</sup>H} NMR (101 MHz, DMSO-*d*6)**  $\delta$  191.8, 153.8, 149.3, 146.7, 140.0, 139.0, 130.0, 129.7, 129.2, 128.70, 128.68, 128.56, 128.1, 126.8, 124.2, 122.0, 121.0, 63.1, 27.6, 20.8; **IR  $\nu$  (neat, cm<sup>-1</sup>)**: 3357, 3318, 2920, 2850, 2359, 2341, 1674, 1593, 1486, 925, 739; **HRMS (ESI, m/z)**: calcd for C<sub>25</sub>H<sub>22</sub>ClN<sub>2</sub>O<sup>+</sup> [M+H]<sup>+</sup>: 401.1415; found: 401.1416.

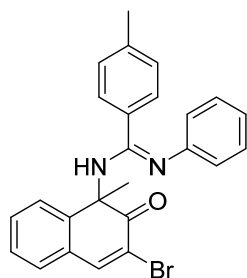

**3ga**

**(*E*)-*N*-(3-bromo-1-methyl-2-oxo-1,2-dihydronaphthalen-1-yl)-4-methyl-*N'*-phenylbenzimidamide (3ga)**; reaction temperature: 50 °C; reaction time: 48 h; petroleum ether/ethylacetate = 15:1; **TLC**:  $R_f$  = 0.2 (PE/EA=10 : 1, UV); yellow solid (m.p.: 315-317 °C); 90% yield (80 mg, 0.18 mmol); **<sup>1</sup>H NMR (400 MHz, Chloroform-*d*)**  $\delta$  7.82 (s, 1H), 7.73 (d,  $J$  = 8.0 Hz, 1H), 7.45 – 7.41 (m, 1H), 7.26 – 7.22 (m, 2H), 7.16 (d,  $J$  = 8.0 Hz, 2H), 7.04 (d,  $J$  = 8.0 Hz, 2H), 6.92 (t,  $J$  = 7.6 Hz, 2H), 6.74 (t,  $J$  = 7.2 Hz, 1H), 6.26 (d,  $J$  = 7.6 Hz, 2H), 5.64 (br, 1H), 2.29 (s, 3H), 1.51 (s, 3H); **<sup>13</sup>C{<sup>1</sup>H} NMR (101 MHz, Chloroform-*d*)**  $\delta$  193.7, 153.8, 148.7, 146.2, 144.7, 139.8, 130.2, 130.1, 129.6, 129.0, 128.9, 128.6, 128.2, 127.1, 124.4, 122.5, 122.2, 121.9, 63.5, 28.5, 21.5; **IR  $\nu$  (neat, cm<sup>-1</sup>)**: 3355, 2920, 2843, 2356, 2339, 1674, 1591, 1483, 824, 695; **HRMS (ESI, m/z)**: calcd for C<sub>25</sub>H<sub>22</sub>BrN<sub>2</sub>O<sup>+</sup> [M+H]<sup>+</sup>: 445.0910; found: 445.0909.

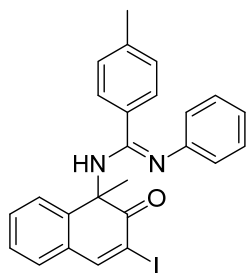

**3ha**

**(E)-N-(3-iodo-1-methyl-2-oxo-1,2-dihydronaphthalen-1-yl)-4-methyl-N'-phenylbenzimidamide (3ha)**; reaction temperature: 50 °C; reaction time: 48 h; petroleum ether/ethylacetate = 15:1; **TLC**:  $R_f$  = 0.2 (PE/EA=10 : 1, UV); yellow solid (m.p.: 324-326 °C); 92% yield (91 mg, 0.18 mmol);  **$^1\text{H}$  NMR (400 MHz, Chloroform-*d*)**  $\delta$  8.14 (s, 1H), 7.74 (d,  $J$  = 8.0 Hz, 1H), 7.43 (td,  $J$  = 7.2, 2.0 Hz, 1H), 7.26 – 7.21(m, 2H), 7.16 (d,  $J$  = 8.0 Hz, 2H), 7.04 (d,  $J$  = 8.0 Hz, 2H), 6.91 (t,  $J$  = 7.6 Hz, 2H), 6.73 (t,  $J$  = 7.6 Hz, 1H), 6.23 (d,  $J$  = 7.6 Hz, 2H), 5.62 (br, 1H), 2.29 (s, 3H), 1.49 (s, 3H);  **$^{13}\text{C}\{^1\text{H}\}$  NMR (101 MHz, Chloroform-*d*)**  $\delta$  194.7, 153.7, 152.5, 148.9, 146.9, 139.8, 130.8, 130.4, 130.2, 129.0, 128.8, 128.7, 128.2, 126.9, 124.3, 122.4, 121.8, 101.7, 62.1, 28.8, 21.5; **IR  $\nu$  (neat,  $\text{cm}^{-1}$ )**: 3351, 2920, 2845, 2339, 1661, 1631, 1589, 1482, 824, 665; **HRMS (ESI,  $m/z$ )**: calcd for  $\text{C}_{25}\text{H}_{22}\text{IN}_2\text{O}^+$   $[\text{M}+\text{H}]^+$ : 493.0771; found: 493.0771.

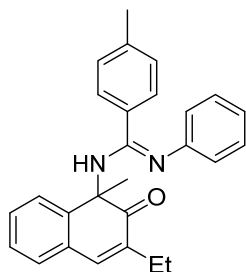

**3ia**

**(E)-N-(3-ethyl-1-methyl-2-oxo-1,2-dihydronaphthalen-1-yl)-4-methyl-N'-phenylbenzimidamide (3ia)**; reaction temperature: 50 °C; reaction time: 48 h; petroleum ether/ethylacetate = 15:1; **TLC**:  $R_f$  = 0.2 (PE/EA=10 : 1, UV); white solid (m.p.: 300-304 °C); 85% yield (67 mg, 0.17 mmol);  **$^1\text{H}$  NMR (400 MHz, Chloroform-*d*)**  $\delta$  7.68 (d,  $J$  = 7.6 Hz, 1H), 7.34 (t,  $J$  = 6.4 Hz, 1H), 7.26 – 7.17 (m, 5H), 7.04 (d,  $J$  = 8.0 Hz, 2H), 6.88 (t,  $J$  = 7.6 Hz, 2H), 6.68 (t,  $J$  = 7.2 Hz, 1H), 6.17 (d,  $J$  = 8.0 Hz, 2H), 5.53 (br, 1H), 2.52 (q,  $J$  = 7.6 Hz, 2H), 2.29 (s, 3H), 1.44 (s, 3H), 1.20 (t,  $J$  = 7.6 Hz, 3H);  **$^{13}\text{C}\{^1\text{H}\}$  NMR (101 MHz, Chloroform-*d*)**  $\delta$  200.2, 153.6, 149.9, 146.1, 139.4,

138.6, 137.9, 130.9, 130.2, 128.9, 128.71, 128.65, 128.6, 128.0, 126.6, 123.8, 122.2, 121.2, 61.9, 29.0, 22.8, 21.4, 13.1; **IR**  $\nu$  (neat,  $\text{cm}^{-1}$ ): 3353, 3304, 2920, 2850, 1656, 1630, 1593, 1484, 1379, 821, 509; **HRMS (ESI, m/z)**: calcd for  $\text{C}_{27}\text{H}_{27}\text{N}_2\text{O}^+$   $[\text{M}+\text{H}]^+$ : 395.2118; found: 395.2117.

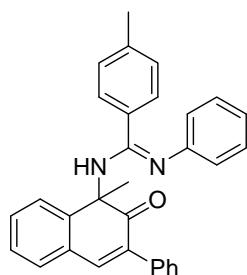

**3ja**

**(E)-4-methyl-N-(1-methyl-2-oxo-3-phenyl-1,2-dihydronaphthalen-1-yl)-N'-phenylbenzimidamide (3ja)**; reaction temperature: 50 °C; reaction time: 48 h; petroleum ether/ethylacetate = 10:1; **TLC**:  $R_f$  = 0.2 (PE/EA=10 : 1, UV); yellow solid (m.p.: 276-279 °C); 95% yield (84 mg, 0.19 mmol);  **$^1\text{H}$  NMR (400 MHz, Chloroform-*d*)**  $\delta$  7.75 (d,  $J$  = 7.6 Hz, 1H), 7.61 (d,  $J$  = 7.2 Hz, 2H), 7.51 (s, 1H), 7.48 – 7.34 (m, 5H), 7.26 (t,  $J$  = 9.2 Hz, 1H), 7.19 (d,  $J$  = 8.0 Hz, 2H), 7.04 (d,  $J$  = 7.6 Hz, 2H), 6.88 (t,  $J$  = 7.6 Hz, 2H), 6.69 (t,  $J$  = 7.2 Hz, 1H), 6.20 (d,  $J$  = 7.6 Hz, 2H), 5.64 (s, 1H), 2.29 (s, 3H), 1.55 (s, 3H);  **$^{13}\text{C}\{^1\text{H}\}$  NMR (101 MHz, Chloroform-*d*)**  $\delta$  198.9, 153.7, 149.7, 146.7, 141.6, 139.5, 136.6, 135.5, 130.8, 129.9, 129.62, 129.60, 129.04, 128.98, 128.7, 128.2, 128.1, 127.9, 126.8, 123.9, 122.2, 121.3, 62.5, 29.0, 21.5; **IR**  $\nu$  (neat,  $\text{cm}^{-1}$ ): 3359, 3321, 2920, 2848, 2357, 1662, 1628, 1591, 1487, 825, 695; **HRMS (ESI, m/z)**: calcd for  $\text{C}_{31}\text{H}_{27}\text{N}_2\text{O}^+$   $[\text{M}+\text{H}]^+$ : 443.2118; found: 443.2117.

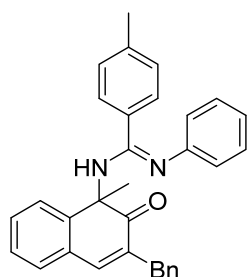

**3ka**

**(E)-N-(3-benzyl-1-methyl-2-oxo-1,2-dihydronaphthalen-1-yl)-4-methyl-N'-phenylbenzimidamide (3ka)**; reaction temperature: 50 °C; reaction time: 48 h; petroleum ether/ethylacetate = 15:1; **TLC**:  $R_f$  = 0.2 (PE/EA=10 : 1, UV); white solid

(m.p.: 302-305 °C); 89% yield (81 mg, 0.18 mmol); **<sup>1</sup>H NMR (400 MHz, Chloroform-*d*)** δ 7.67 (d, *J* = 7.6 Hz, 1H), 7.35 (t, *J* = 8.0 Hz, 1H), 7.26 – 7.16 (m, 9H), 7.04 (t, *J* = 10.0 Hz, 3H), 6.88 (t, *J* = 7.6 Hz, 2H), 6.70 (t, *J* = 7.2 Hz, 1H), 6.10 (d, *J* = 7.6 Hz, 2H), 5.51 (br, 1H), 3.84 (s, 2H), 2.28 (s, 3H), 1.43 (s, 3H); **<sup>13</sup>C{<sup>1</sup>H} NMR (101 MHz, Chloroform-*d*)** δ 199.9, 153.5, 149.7, 146.3, 141.0, 139.8, 139.5, 135.6, 130.8, 129.9, 129.3, 129.1, 129.0, 128.7, 128.5, 128.1, 126.6, 126.1, 123.8, 122.3, 121.3, 62.1, 35.6, 29.0, 21.5; **IR ν (neat, cm<sup>-1</sup>):** 3359, 3316, 2920, 2848, 2360, 2341, 1661, 1653, 1486, 821, 418; **HRMS (ESI, m/z):** calcd for C<sub>32</sub>H<sub>29</sub>N<sub>2</sub>O<sup>+</sup> [M+H]<sup>+</sup>: 457.2274; found: 457.2271.

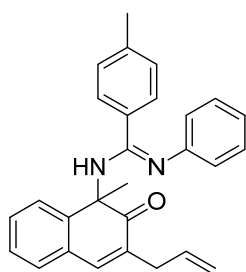

**3a**

**(*E*)-*N*-(3-allyl-1-methyl-2-oxo-1,2-dihydronaphthalen-1-yl)-4-methyl-*N'*-phenylbenzimidamide (3a)**; reaction temperature: 50 °C; reaction time: 48 h; petroleum ether/ethylacetate = 15:1; **TLC:** *R<sub>f</sub>* = 0.2 (PE/EA=10 : 1, UV); white solid (m.p.: 276-279 °C); 77% yield (63 mg, 0.15 mmol); **<sup>1</sup>H NMR (400 MHz, Chloroform-*d*)** δ 7.69 (d, *J* = 7.6 Hz, 1H), 7.36 (t, *J* = 6.0 Hz, 1H), 7.26 – 7.17 (m, 5H), 7.03 (d, *J* = 8 Hz, 2H), 6.89 (t, *J* = 7.6 Hz, 2H), 6.70 (t, *J* = 7.6 Hz, 1H), 6.19 (d, *J* = 8.0 Hz, 2H), 6.03 – 5.93 (m, 1H), 5.58 (br, 1H), 5.19 – 5.10 (m, 2H), 3.31 – 3.20 (m, 2H), 2.29 (s, 3H), 1.45 (s, 3H); **<sup>13</sup>C{<sup>1</sup>H} NMR (101 MHz, Chloroform-*d*)** δ 198.7, 153.7, 149.5, 146.1, 140.1, 139.5, 135.8, 134.4, 130.7, 129.9, 129.0, 128.9, 128.8, 128.7, 128.1, 126.7, 123.9, 122.4, 121.4, 116.8, 62.1, 33.6, 28.9, 21.4; **IR ν (neat, cm<sup>-1</sup>):** 3299, 2921, 2845, 2341, 1659, 1629, 1483, 1442, 823, 421; **HRMS (ESI, m/z):** calcd for C<sub>28</sub>H<sub>27</sub>N<sub>2</sub>O<sup>+</sup> [M+H]<sup>+</sup>: 407.2118; found: 407.2119.

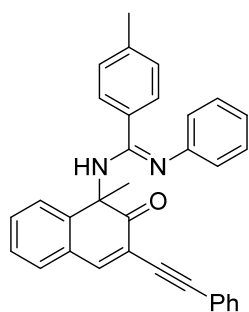

**3ma**

**(E)-4-methyl-N-(1-methyl-2-oxo-3-(phenylethynyl)-1,2-dihydronaphthalen-1-yl)-N'-phenylbenzimidamide (3ma)**; reaction temperature: 50 °C; reaction time: 48 h; petroleum ether/ethylacetate = 5:1; **TLC**:  $R_f$  = 0.2 (PE/EA=5 : 1, UV); yellow solid (m.p.: 231-234 °C); 76% yield (71 mg, 0.15 mmol);  **$^1\text{H}$  NMR (400 MHz, Chloroform-*d*)**  $\delta$  7.79 (d,  $J$  = 8.0 Hz, 1H), 7.52 – 7.32 (m, 9H), 7.25 – 7.22 (m, 3H), 7.05 – 7.00(m, 4H), 6.92 (br, 1H), 6.63 (br, 1H), 2.27 (s, 3H), 1.61 (s, 3H);  **$^{13}\text{C}\{^1\text{H}\}$  NMR (101 MHz, Chloroform-*d*)**  $\delta$  145.1, 139.8, 131.9, 130.3, 129.3, 128.9, 128.6, 128.5, 128.4, 128.3, 127.0, 125.9, 124.1, 122.9, 120.2, 95.1, 85.7, 66.7, 29.8, 21.5; **IR  $\nu$  (neat,  $\text{cm}^{-1}$ )**: 3349, 3061, 2923, 2853, 2360, 2340, 1664, 1630, 1593, 1489, 1366, 1156, 824,, 519; **HRMS (ESI,  $m/z$ )**: calcd for  $\text{C}_{33}\text{H}_{27}\text{N}_2\text{O}^+$   $[\text{M}+\text{H}]^+$ : 467.2118; found: 467.2117.

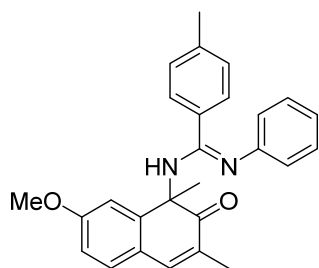

**3na**

**(E)-N-(7-methoxy-1,3-dimethyl-2-oxo-1,2-dihydronaphthalen-1-yl)-4-methyl-N'-phenylbenzimidamide (3na)**; reaction temperature: 50 °C; reaction time: 48 h; petroleum ether/ethylacetate = 10:1; **TLC**:  $R_f$  = 0.2 (PE/EA=10 : 1, UV); white solid (m.p.: 319-322 °C); 85% yield (70 mg, 0.17 mmol);  **$^1\text{H}$  NMR (400 MHz, Chloroform-*d*)**  $\delta$  7.25 (s, 1H), 7.17(t,  $J$  = 6.8 Hz, 4H), 7.04 (d,  $J$  = 7.6 Hz, 2H), 6.90 (t,  $J$  = 7.6 Hz, 2H), 6.76 – 6.70 (m, 2H), 6.22 (d,  $J$  = 7.6 Hz, 2H), 5.52 (br, 1H), 3.86 (s, 3H), 2.28 (s, 3H), 2.07 (s, 3H), 1.43 (s, 3H);  **$^{13}\text{C}\{^1\text{H}\}$  NMR (101 MHz, Chloroform-*d*)**  $\delta$  200.8, 160.5, 153.6, 149.7, 148.5, 140.2, 139.4, 130.9, 129.9, 129.8, 128.9, 128.6, 128.1, 123.6,

122.3, 121.3, 111.3, 110.4, 62.0, 55.4, 29.4, 21.4, 16.1; **IR**  $\nu$  (neat,  $\text{cm}^{-1}$ ): 3356, 3299, 2920, 2850, 2362, 1631, 1628, 1594, 1493, 1425, 1207, 823, 509; **HRMS (ESI, m/z)**: calcd for  $\text{C}_{27}\text{H}_{27}\text{N}_2\text{O}_2^+$   $[\text{M}+\text{H}]^+$ : 411.2067; found:411.2067.

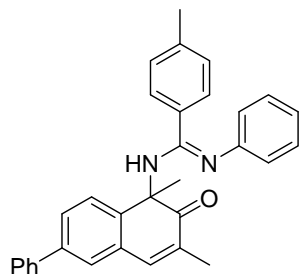

**3oa**

**(E)-N-(1,3-dimethyl-2-oxo-6-phenyl-1,2-dihydronaphthalen-1-yl)-4-methyl-N'-phenylbenzimidamide (3oa)**; reaction temperature: 50 °C; reaction time: 48 h; petroleum ether/ethylacetate = 10:1; **TLC**:  $R_f$  = 0.2 (PE/EA=10 : 1, UV); white solid (m.p.: 285-288 °C); 78% yield (71 mg, 0.16 mmol);  **$^1\text{H NMR}$  (400 MHz, Chloroform-*d*)**  $\delta$  7.75 (d,  $J$ =8.0 Hz, 1H), 7.61 – 7.57 (t,  $J$  = 8.0 Hz, 3H), 7.44 (t,  $J$  = 8.4 Hz, 3H), 7.35 (t,  $J$  = 7.6 Hz, 1H), 7.28 (s, 1H), 7.20 (d,  $J$  = 8.0 Hz, 2H), 7.05 (d,  $J$  = 8.0 Hz, 2H), 6.90 (t,  $J$  = 7.6 Hz, 2H), 6.70 (t,  $J$  = 7.6 Hz, 1H), 6.22 (d,  $J$  = 7.6 Hz, 2H), 5.56 (s, 1H), 2.29 (s, 3H), 2.13 (s, 3H), 1.48 (s, 3H);  **$^{13}\text{C}\{^1\text{H}\}$  NMR (101 MHz, Chloroform-*d*)**  $\delta$  200.4, 153.7, 149.6, 145.1, 140.6, 140.0, 139.51, 139.46, 132.8, 130.8, 130.5, 129.0, 128.9, 128.7, 128.1, 127.4, 127.1, 127.0, 124.5, 122.4, 121.4, 61.7, 29.0, 21.4, 16.3; **IR**  $\nu$  (neat,  $\text{cm}^{-1}$ ): 3349, 3054, 2923, 2854, 2237, 1666, 1630, 1592, 1483, 1367, 1115, 824, 696, 518; **HRMS (ESI, m/z)**: calcd for  $\text{C}_{32}\text{H}_{29}\text{N}_2\text{O}^+$   $[\text{M}+\text{H}]^+$ : 457.2274; found: 457.2275.

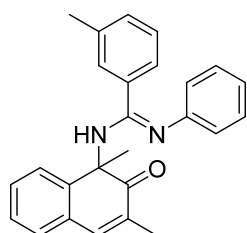

**3ab**

**(E)-N-(1,3-dimethyl-2-oxo-1,2-dihydronaphthalen-1-yl)-3-methyl-N'-phenylbenzimidamide (3ab)**; reaction temperature: 50 °C; reaction time: 48 h;

petroleum ether/ethylacetate = 15:1; **TLC**:  $R_f$  = 0.2 (PE/EA=10 : 1, UV); white solid (m.p.: 295-298 °C); 82% yield (62 mg, 0.16 mmol); **<sup>1</sup>H NMR (400 MHz, Chloroform-*d*)**  $\delta$  7.68 (d,  $J$  = 7.6 Hz, 1H), 7.36 – 7.26 (m, 1H), 7.22 (d,  $J$  = 4.4 Hz, 3H), 7.18 – 7.05 (m, 3H), 7.01 (s, 1H), 6.88 (t,  $J$  = 7.6 Hz, 2H), 6.68 (t,  $J$  = 7.2 Hz, 1H), 6.18 (d,  $J$  = 7.6 Hz, 2H), 5.52 (br, 1H), 2.26 (s, 3H), 2.10 (s, 3H), 1.45 (s, 3H); **<sup>13</sup>C{<sup>1</sup>H} NMR (101 MHz, Chloroform-*d*)**  $\delta$  200.5, 153.7, 149.5, 146.2, 140.2, 138.0, 133.7, 132.4, 130.12, 130.09, 129.1, 128.7, 128.4, 128.1, 128.0, 126.6, 125.8, 123.9, 122.3, 121.4, 61.9, 29.0, 21.4, 16.2; **IR  $\nu$  (neat, cm<sup>-1</sup>)**: 3298, 2920, 2850, 2359, 1659, 1630, 1589, 1482, 793; **HRMS (ESI, m/z)**: calcd for C<sub>26</sub>H<sub>25</sub>N<sub>2</sub>O<sup>+</sup> [M+H]<sup>+</sup>: 381.1961; found: 381.1962.

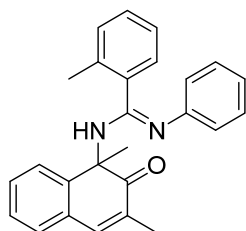

**3ac**

**(*E*)-*N*-(1,3-dimethyl-2-oxo-1,2-dihydronaphthalen-1-yl)-2-methyl-*N'*-phenylbenzimidamide (3ac)**; reaction temperature: 50 °C; reaction time: 48 h; petroleum ether/ethylacetate = 5:1; **TLC**:  $R_f$  = 0.2 (PE/EA=5 : 1, UV); yellow oil; 96% yield (73 mg, 0.19 mmol); **<sup>1</sup>H NMR (400 MHz, Chloroform-*d*)**  $\delta$  7.69 (d,  $J$  = 7.6 Hz, 1H), 7.43 – 7.26 (m, 5H), 7.22 – 7.10 (m, 2H), 7.03 (d,  $J$  = 7.6 Hz, 1H), 6.84 (t,  $J$  = 7.6 Hz, 2H), 6.66 (t,  $J$  = 7.2 Hz, 1H), 6.16 (d,  $J$  = 8.0 Hz, 2H), 5.43 (s, 1H), 2.12 (s, 6H), 1.43 (s, 3H); **<sup>13</sup>C{<sup>1</sup>H} NMR (101 MHz, Chloroform-*d*)**  $\delta$  200.8, 154.1, 149.1, 146.3, 140.3, 136.0, 134.1, 132.4, 130.2, 130.1, 129.6, 129.0, 128.7, 128.4, 127.8, 126.6, 125.4, 124.0, 122.1, 121.6, 61.6, 29.0, 19.5, 16.3; **IR  $\nu$  (neat, cm<sup>-1</sup>)**: 3360, 2922, 2848, 2359, 2341, 1661, 1630, 1593, 1485, 695; **HRMS (ESI, m/z)**: calcd for C<sub>26</sub>H<sub>25</sub>N<sub>2</sub>O<sup>+</sup> [M+H]<sup>+</sup>: 381.1961; found: 381.1959.



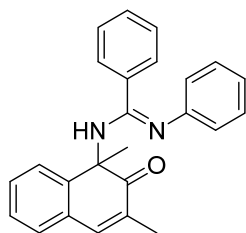

**3ad**

**(E)-N-(1,3-dimethyl-2-oxo-1,2-dihydronaphthalen-1-yl)-N'-phenylbenzimidamide (3ad)**; reaction temperature: 50 °C; reaction time: 48 h; petroleum ether/ethylacetate = 15:1; **TLC**:  $R_f$  = 0.2 (PE/EA=10 : 1, UV); white solid (m.p.: 275-279 °C); 83% yield (61 mg, 0.17 mmol);  **$^1\text{H}$  NMR (400 MHz, Chloroform-*d*)**  $\delta$  7.69 (d,  $J$  = 7.6 Hz, 1H), 7.41 – 7.32 (m, 2H), 7.32 – 7.26 (m, 4H), 7.24 – 7.19 (m, 3H), 6.88 (t,  $J$  = 7.6 Hz, 2H), 6.69 (t,  $J$  = 7.6 Hz, 1H), 6.18 (d,  $J$  = 7.6 Hz, 2H), 5.57 (br, 1H), 2.11 (s, 3H), 1.45 (s, 3H);  **$^{13}\text{C}\{^1\text{H}\}$  NMR (101 MHz, Chloroform-*d*)**  $\delta$  200.7, 153.6, 149.5, 146.1, 140.2, 133.8, 132.4, 130.1, 129.4, 128.74, 128.69, 128.4, 128.3, 128.1, 126.6, 123.9, 122.3, 121.4, 61.8, 29.1, 16.2; **IR  $\nu$  (neat,  $\text{cm}^{-1}$ )**: 3339, 2985, 2922, 2848, 1661, 1632, 1592, 1484, 1260, 750, 698; **HRMS (ESI,  $m/z$ )**: calcd for  $\text{C}_{25}\text{H}_{23}\text{N}_2\text{O}^+$   $[\text{M}+\text{H}]^+$ : 367.1805; found: 367.1804.

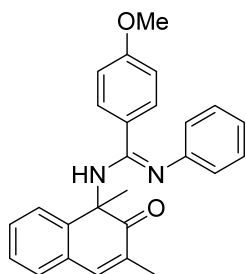

**3ae**

**(E)-N-(1,3-dimethyl-2-oxo-1,2-dihydronaphthalen-1-yl)-4-methoxy-N'-phenylbenzimidamide (3ae)**; reaction temperature: 50 °C; reaction time: 48 h; petroleum ether/ethylacetate = 15:1; **TLC**:  $R_f$  = 0.2 (PE/EA=10 : 1, UV); yellow solid (m.p.: 276-278 °C); 87% yield (69 mg, 0.17 mmol);  **$^1\text{H}$  NMR (400 MHz, Chloroform-*d*)**  $\delta$  7.68 (d,  $J$  = 7.6 Hz, 1H), 7.37 – 7.29 (m, 1H), 7.26 – 7.12 (m, 5H), 6.90 (t,  $J$  = 7.6 Hz, 2H), 6.80 – 6.62 (m, 3H), 6.37 – 6.09 (m, 2H), 5.56 (s, 1H), 3.75 (s, 3H), 2.09 (s, 3H), 1.44 (s, 3H);  **$^{13}\text{C}\{^1\text{H}\}$  NMR (101 MHz, Chloroform-*d*)**  $\delta$  200.2, 160.4, 153.4, 149.6, 146.1, 140.0, 132.4, 130.3, 130.1, 128.7, 128.4, 128.1, 126.6, 125.8, 123.9, 122.4,

121.4, 113.6, 61.9, 55.3, 28.9, 16.2; **IR**  $\nu$  (neat,  $\text{cm}^{-1}$ ): 3358, 2917, 2848, 2362, 1664, 1631, 1589, 1482, 1437, 1172, 1028, 833, 514; **HRMS (ESI, m/z)**: calcd for  $\text{C}_{26}\text{H}_{25}\text{N}_2\text{O}_2^+$   $[\text{M}+\text{H}]^+$ : 397.1911; found: 397.1912.

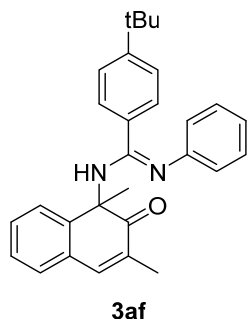

**(E)-4-(tert-butyl)-N-(1,3-dimethyl-2-oxo-1,2-dihydronaphthalen-1-yl)-N'-phenylbenzimidamide (3af)**; reaction temperature: 50 °C; reaction time: 48 h; petroleum ether/ethylacetate = 15:1; **TLC**:  $R_f = 0.2$  (PE/EA=10 : 1, UV); white solid (m.p.: 276-279 °C); 98% yield (83 mg, 0.19 mmol);  **$^1\text{H}$  NMR (400 MHz, Chloroform-*d*)**  $\delta$  7.67 (d,  $J = 8.0$  Hz, 1H), 7.35 – 7.31 (m, 1H), 7.28 – 7.13 (m, 7H), 6.89 (t,  $J = 7.6$  Hz, 2H), 6.70 (t,  $J = 7.6$  Hz, 1H), 6.19 (d,  $J = 7.6$  Hz, 2H), 5.54 (s, 1H), 2.10 (s, 3H), 1.44 (s, 3H), 1.26 (s, 9H);  **$^{13}\text{C}\{^1\text{H}\}$  NMR (101 MHz, Chloroform-*d*)**  $\delta$  200.8, 153.4, 152.6, 149.7, 146.3, 140.2, 132.5, 130.8, 130.2, 128.7, 128.5, 128.4, 128.1, 126.6, 125.2, 123.9, 122.2, 121.3, 61.8, 34.8, 31.3, 29.1, 16.2; **IR**  $\nu$  (neat,  $\text{cm}^{-1}$ ): 3328, 2962, 2848, 2362, 1662, 1623, 1592, 1485, 1437, 1126, 841, 695; **HRMS (ESI, m/z)**: calcd for  $\text{C}_{29}\text{H}_{31}\text{N}_2\text{O}^+$   $[\text{M}+\text{H}]^+$ : 423.2431; found: 423.2432.

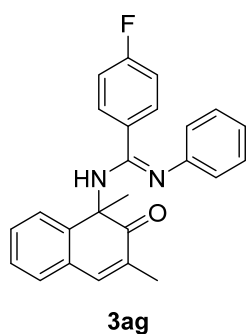

**(E)-N-(1,3-dimethyl-2-oxo-1,2-dihydronaphthalen-1-yl)-4-fluoro-N'-phenylbenzimidamide (3ag)**; reaction temperature: 50 °C; reaction time: 48 h; petroleum ether/ethylacetate = 15:1; **TLC**:  $R_f = 0.2$  (PE/EA=10 : 1, UV); white solid (m.p.: 298-302 °C); 86% yield (66 mg, 0.17 mmol);  **$^1\text{H}$  NMR (400 MHz, Chloroform-*d*)**  $\delta$  7.66 (d,  $J = 7.6$  Hz, 1H), 7.36 – 7.32 (m, 1H), 7.28 -7.25 (m, 2H), 7.24 – 7.17 (m,

3H), 6.91 (dd,  $J = 18.4, 8.8$  Hz, 4H), 6.70 (t,  $J = 7.6$  Hz, 1H), 6.16 (d,  $J = 8.0$  Hz, 2H), 5.51 (s, 1H), 2.10 (s, 3H), 1.45 (s, 3H);  $^{13}\text{C}\{^1\text{H}\}$  NMR (101 MHz, Chloroform-*d*)  $\delta$  200.5, 163.2 (d,  $J = 250.7$  Hz) 152.7, 149.3, 146.0, 140.3, 132.4, 130.8 (d,  $J = 8.4$  Hz), 130.1, 129.8, 128.8, 128.5, 128.2, 126.7, 123.8, 122.2, 121.7, 115.4 (d,  $J = 21.6$  Hz), 62.0, 29.1, 16.2; IR  $\nu$  (neat,  $\text{cm}^{-1}$ ): 3344, 2921, 2848, 1663, 1631, 1592, 1483, 1152, 841, 507; HRMS (ESI,  $m/z$ ): calcd for  $\text{C}_{25}\text{H}_{22}\text{FN}_2\text{O}^+$   $[\text{M}+\text{H}]^+$ : 385.1711; found: 385.1711.

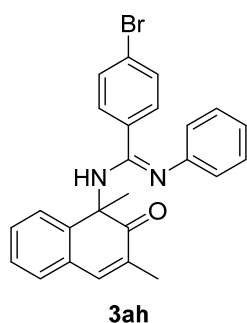

**(*E*)-4-bromo-*N*-(1,3-dimethyl-2-oxo-1,2-dihydronaphthalen-1-yl)-*N'*-**

**phenylbenzimidamide (3ah)**; reaction temperature: 50 °C; reaction time: 48 h; petroleum ether/ethylacetate = 10:1; TLC:  $R_f = 0.2$  (PE/EA=10 : 1, UV); white solid (m.p.: 299-302 °C); 77% yield (69 mg, 0.15 mmol);  $^1\text{H}$  NMR (400 MHz, Chloroform-*d*)  $\delta$  7.65 (d,  $J = 7.6$  Hz, 1H), 7.38 – 7.32 (m, 3H), 7.26 – 7.21 (m, 3H), 7.15 (d,  $J = 8.0$  Hz, 2H), 6.90 (t,  $J = 7.6$  Hz, 2H), 6.71 (t,  $J = 7.6$  Hz, 1H), 6.15 (d,  $J = 8.0$  Hz, 2H), 5.51 (s, 1H), 2.10 (s, 3H), 1.45 (s, 3H);  $^{13}\text{C}\{^1\text{H}\}$  NMR (101 MHz, Chloroform-*d*)  $\delta$  200.7, 152.6, 149.1, 145.9, 140.4, 132.7, 132.4, 131.6, 130.3, 130.1, 128.8, 128.5, 128.3, 126.7, 123.8, 122.1, 121.8, 62.0, 29.1, 16.2; IR  $\nu$  (neat,  $\text{cm}^{-1}$ ): 3284, 3060, 2922, 2850, 2357, 2334, 1649, 1628, 1587, 1483, 1442, 1175, 1113, 827, 694; HRMS (ESI,  $m/z$ ): calcd for  $\text{C}_{25}\text{H}_{22}\text{BrN}_2\text{O}^+$   $[\text{M}+\text{H}]^+$ : 445.0910; found: 445.0911.

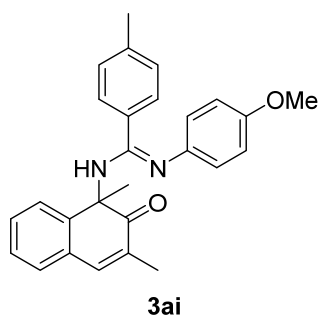

**(E)-N-(1,3-dimethyl-2-oxo-1,2-dihydronaphthalen-1-yl)-N'-(4-methoxyphenyl)-4-methylbenzimidamide (3ai)**; reaction temperature: 50 °C; reaction time: 48 h; petroleum ether/ethylacetate = 10:1; **TLC**:  $R_f$  = 0.2 (PE/EA=10 : 1, UV); yellow solid (m.p.: 251-254 °C); 82% yield (67 mg, 0.16 mmol); **<sup>1</sup>H NMR (400 MHz, Chloroform-*d*)**  $\delta$  7.68 (d,  $J$  = 7.6 Hz, 1H), 7.38 – 7.30 (m, 1H), 7.24 – 7.09 (m, 5H), 7.04 (d,  $J$  = 7.6 Hz, 2H), 6.46 (d,  $J$  = 8.4 Hz, 2H), 6.14 (s, 2H), 5.29 (br, 1H), 3.61 (s, 3H), 2.29 (s, 3H), 2.07 (s, 3H), 1.43 (s, 3H); **<sup>13</sup>C{<sup>1</sup>H} NMR (101 MHz, Chloroform-*d*)**  $\delta$  199.4, 154.7, 154.0, 146.1, 142.5, 139.4, 132.4, 130.7, 130.1, 129.0, 128.71, 128.66, 128.2, 126.6, 124.1, 123.3, 113.5, 62.1, 55.3, 28.6, 21.4, 16.3; **IR  $\nu$  (neat, cm<sup>-1</sup>)**: 3349, 2920, 2848, 2357, 2334, 1661, 1632, 1502, 1237, 1177, 1118, 1030, 830, 694; **HRMS (ESI, m/z)**: calcd for C<sub>27</sub>H<sub>27</sub>N<sub>2</sub>O<sub>2</sub><sup>+</sup> [M+H]<sup>+</sup>: 411.2067; found: 411.2065.

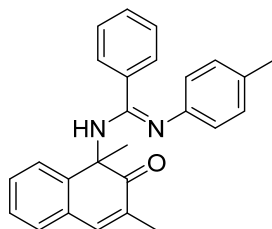

**3aj**

**(E)-N-(1,3-dimethyl-2-oxo-1,2-dihydronaphthalen-1-yl)-N'-(p-tolyl)benzimidamide (3aj)**; reaction temperature: 50 °C; reaction time: 48 h; petroleum ether/ethylacetate = 15:1; **TLC**:  $R_f$  = 0.2 (PE/EA=10 : 1, UV); white solid (m.p.: 273-275 °C); 91% yield (69 mg, 0.18 mmol); **<sup>1</sup>H NMR (400 MHz, Chloroform-*d*)**  $\delta$  7.68 (d,  $J$  = 7.6 Hz, 1H), 7.37 – 7.26 (m, 5H), 7.24 – 7.20 (m, 4H), 6.68 (d,  $J$  = 8.0 Hz, 2H), 6.07 (d,  $J$  = 7.6 Hz, 2H), 5.51 (br, 1H), 2.09 (s, 6H), 1.44 (s, 3H); **<sup>13</sup>C{<sup>1</sup>H} NMR (101 MHz, Chloroform-*d*)**  $\delta$  200.6, 153.4, 146.7, 146.2, 140.1, 134.0, 132.5, 130.7, 130.2, 129.4, 128.74, 128.71, 128.4, 128.3, 126.6, 123.9, 122.1, 61.9, 29.0, 20.8, 16.3; **IR  $\nu$  (neat, cm<sup>-1</sup>)**: 3334, 2919, 2848, 2282, 1659, 1621, 1598, 1527, 1504, 1443, 1331, 1031, 830, 501; **HRMS (ESI, m/z)**: calcd for C<sub>26</sub>H<sub>25</sub>N<sub>2</sub>O<sup>+</sup> [M+H]<sup>+</sup>: 381.1961; found: 381.1961.

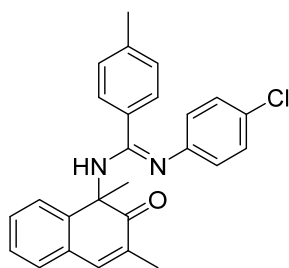

**3ak**

**(E)-N'-(4-chlorophenyl)-N-(1,3-dimethyl-2-oxo-1,2-dihydronaphthalen-1-yl)-4-methylbenzimidamide (3ak)**; reaction temperature: 50 °C; reaction time: 48 h; petroleum ether/ethylacetate = 15:1; **TLC**:  $R_f$  = 0.2 (PE/EA=10 : 1, UV); white solid (m.p.: 279-282 °C); 86% yield (74 mg, 0.17 mmol); **<sup>1</sup>H NMR (400 MHz, Chloroform-*d*)**  $\delta$  7.64 (d,  $J$  = 7.6 Hz, 1H), 7.36 – 7.30 (m, 1H), 7.26 – 7.21 (m, 3H), 7.15 (d,  $J$  = 7.6 Hz, 2H), 7.06 (d,  $J$  = 8.0 Hz, 2H), 6.82 (d,  $J$  = 8.0 Hz, 2H), 6.07 (d,  $J$  = 8.0 Hz, 2H), 5.58 (s, 1H), 2.30 (s, 3H), 2.09 (s, 3H), 1.44 (s, 3H); **<sup>13</sup>C{<sup>1</sup>H} NMR (101 MHz, Chloroform-*d*)**  $\delta$  200.6, 154.1, 148.3, 146.1, 140.2, 139.7, 132.4, 130.4, 130.1, 129.1, 128.8, 128.6, 128.4, 128.1, 126.6, 126.3, 123.7, 123.4, 61.8, 29.0, 21.4, 16.1; **IR  $\nu$  (neat, cm<sup>-1</sup>)**: 3349, 2987, 2920, 2848, 2359, 2342, 1666, 1628, 1581, 1483, 1275, 1260, 1083, 836, 750; **HRMS (ESI, m/z)**: calcd for C<sub>26</sub>H<sub>24</sub>ClN<sub>2</sub>O<sup>+</sup> [M+H]<sup>+</sup>: 415.1572; found: 415.1571.

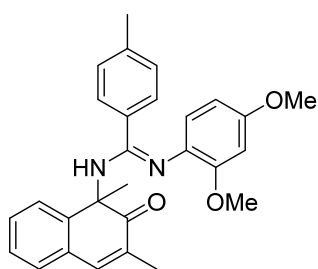

**3al**

**(E)-N'-(2,4-dimethoxyphenyl)-N-(1,3-dimethyl-2-oxo-1,2-dihydronaphthalen-1-yl)-4-methylbenzimidamide (3al)**; reaction temperature: 50 °C; reaction time: 48 h; petroleum ether/ethylacetate = 10:1; **TLC**:  $R_f$  = 0.2 (PE/EA=10 : 1, UV); yellow solid (m.p.: 251-254 °C); 91% yield (80 mg, 0.18 mmol); **<sup>1</sup>H NMR (400 MHz, Chloroform-*d*)**  $\delta$  7.73 (d,  $J$  = 8.0 Hz, 1H), 7.31 – 7.26 (m, 2H), 7.21 – 7.12 (m, 4H), 6.98 (d,  $J$  = 8.0 Hz, 2H), 6.20 (s, 3H), 3.64 (s, 3H), 3.30 (s, 3H), 2.25 (s, 3H), 1.96 (s, 3H), 1.49 (s, 3H); **<sup>13</sup>C{<sup>1</sup>H} NMR (101 MHz, DMSO-*d*6)**  $\delta$  199.0, 154.9, 152.0, 146.7, 138.5, 131.8, 129.8,

128.2, 128.1, 127.4, 126.1, 124.3, 104.8, 100.5, 61.6, 55.6, 54.9, 27.8, 20.8, 16.2; **IR  $\nu$  (neat,  $\text{cm}^{-1}$ ):** 3366, 3007, 2920, 2848, 2362, 2334, 1634, 1499, 1469, 1275, 1260, 1207, 1157, 1035, 824, 504; **HRMS (ESI,  $m/z$ ):** calcd for  $\text{C}_{28}\text{H}_{29}\text{N}_2\text{O}_3^+$   $[\text{M}+\text{H}]^+$ : 441.2173; found: 441.2172.

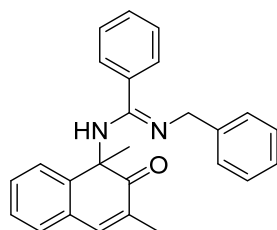

**3am**

**(*E*)-*N'*-benzyl-*N*-(1,3-dimethyl-2-oxo-1,2-dihydronaphthalen-1-yl)benzimidamide (3am);** reaction temperature: 50 °C; reaction time: 48 h; petroleum ether/ethylacetate = 10:1; **TLC:**  $R_f$  = 0.2 (PE/EA=10 : 1, UV); yellow oil; 81% yield (62 mg, 0.16 mmol);  **$^1\text{H}$  NMR (400 MHz, Chloroform-*d*)**  $\delta$  7.70 (d,  $J$  = 7.6 Hz, 1H), 7.37 – 7.34 (m, 6H), 7.30 – 7.22 (m, 3H), 7.03 (s, 3H), 6.57 (s, 2H), 4.19 (d,  $J$  = 16.4 Hz, 1H), 3.99 (d,  $J$  = 16.4 Hz, 1H), 1.98 (s, 3H), 1.43 (s, 3H);  **$^{13}\text{C}\{^1\text{H}\}$  NMR (101 MHz, Chloroform-*d*)**  $\delta$  202.4, 156.7, 146.3, 142.0, 138.9, 133.6, 132.3, 130.2, 129.4, 128.8, 128.5, 128.1, 127.82, 127.75, 126.6, 126.5, 125.6, 124.6, 63.0, 52.7, 28.6, 16.5; **IR  $\nu$  (neat,  $\text{cm}^{-1}$ ):** 3349, 3059, 2986, 2920, 2848, 1648, 1599, 1494, 1443, 1293, 1260, 1027, 948, 751; **HRMS (ESI,  $m/z$ ):** calcd for  $\text{C}_{26}\text{H}_{25}\text{N}_2\text{O}^+$   $[\text{M}+\text{H}]^+$ : 381.1961; found:381.1962.

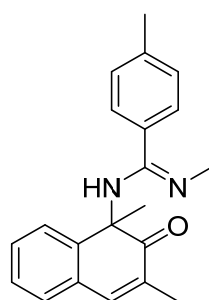

**3an**

**(*E*)-*N*-(1,3-dimethyl-2-oxo-1,2-dihydronaphthalen-1-yl)-*N'*,4-dimethylbenzimidamide (3an);** reaction temperature: 50 °C; reaction time: 48 h; petroleum ether/ethylacetate = 5:1; **TLC:**  $R_f$  = 0.2 (PE/EA=2 : 1, UV); yellow oil; 39% yield (25 mg, 0.08 mmol);  **$^1\text{H}$  NMR (400 MHz, Chloroform-*d*)**  $\delta$  7.69 (d,  $J$  = 7.6 Hz, 1H), 7.35 (d,  $J$  = 7.6 Hz, 2H), 7.26 – 7.14 (m, 5H), 7.00 (d,  $J$  = 7.6 Hz, 1H), 6.51 (s,

1H), 2.79 (s, 3H), 2.35 (s, 3H), 2.14 (s, 3H), 1.53 (s, 3H);  $^{13}\text{C}\{^1\text{H}\}$  NMR (101 MHz, Chloroform-*d*)  $\delta$  203.2, 164.0, 142.7, 140.1, 131.9, 130.1, 129.0, 128.6, 128.0, 127.2, 126.8, 125.9, 71.5, 30.7, 23.7, 21.5, 18.6; IR  $\nu$  (neat,  $\text{cm}^{-1}$ ): 3349, 3052, 2924, 2359, 1661, 1616, 1586, 1514, 1442, 1375, 1118, 1019, 951, 825, 579; HRMS (ESI,  $m/z$ ): calcd for  $\text{C}_{21}\text{H}_{23}\text{N}_2\text{O}^+$   $[\text{M}+\text{H}]^+$ : 319.1805; found: 319.1805.

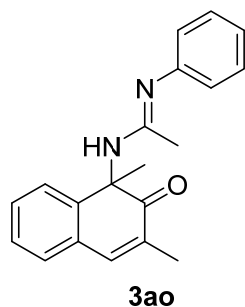

**(E)-N-(1,3-dimethyl-2-oxo-1,2-dihydronaphthalen-1-yl)-N'-phenylacetimidamide (3ao)**; reaction temperature: 50 °C; reaction time: 48 h; petroleum ether/ethylacetate = 10:1; TLC:  $R_f$  = 0.2 (PE/EA=5 : 1, UV); white solid (m.p.: 255-257 °C); 82% yield (50 mg, 0.16 mmol);  $^1\text{H}$  NMR (400 MHz, Chloroform-*d*)  $\delta$  7.54 (d,  $J$  = 7.6 Hz, 1H), 7.31 (t,  $J$  = 7.6 Hz, 1H), 7.26 – 7.18 (m, 2H), 7.15 (s, 1H), 7.06 (t,  $J$  = 7.6 Hz, 2H), 6.84 (t,  $J$  = 7.2 Hz, 1H), 6.30 (d,  $J$  = 8.0 Hz, 2H), 5.29 (br, 1H), 2.00 (s, 3H), 1.78 (s, 3H), 1.42 (s, 3H);  $^{13}\text{C}\{^1\text{H}\}$  NMR (101 MHz, Chloroform-*d*)  $\delta$  199.0, 152.4, 149.9, 146.1, 139.8, 132.1, 130.0, 128.6, 128.5, 128.2, 126.5, 124.1, 122.0, 121.8, 61.8, 28.8, 16.28, 16.25; IR  $\nu$  (neat,  $\text{cm}^{-1}$ ): 3348, 2919, 2848, 2359, 1667, 1646, 1628, 1589, 1509, 1484, 1374, 1260, 1083, 836, 796; HRMS (ESI,  $m/z$ ): calcd for  $\text{C}_{20}\text{H}_{21}\text{N}_2\text{O}^+$   $[\text{M}+\text{H}]^+$ : 305.1648; found: 305.1649.

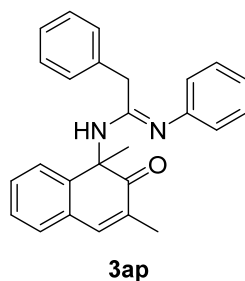

**(E)-N-(1,3-dimethyl-2-oxo-1,2-dihydronaphthalen-1-yl)-N',2-diphenylacetimidamide (3ap)**; reaction temperature: 50 °C; reaction time: 48 h; petroleum ether/ethylacetate = 10:1; TLC:  $R_f$  = 0.2 (PE/EA=5 : 1, UV); white solid

(m.p.: 231-234 °C); 66% yield (50 mg, 0.13 mmol); **<sup>1</sup>H NMR (400 MHz, Chloroform-*d*)** δ 7.38 (t, *J* = 7.2 Hz, 2H), 7.31 – 7.28 (m, 3H), 7.24 – 7.21 (m, 4H), 7.17 (s, 1H), 7.06 (t, *J* = 7.6 Hz, 2H), 6.83 (t, *J* = 7.2 Hz, 1H), 6.31 (d, *J* = 7.6 Hz, 2H), 5.12 (s, 1H), 3.49 (q, *J* = 15.6 Hz, 2H), 2.02 (s, 3H), 1.28 (s, 3H); **<sup>13</sup>C{<sup>1</sup>H} NMR (101 MHz, Chloroform-*d*)** δ 200.6, 152.4, 149.9, 146.2, 140.1, 136.3, 132.2, 130.2, 129.2, 128.9, 128.53, 128.47, 128.2, 127.0, 126.5, 123.9, 122.0, 121.6, 61.3, 35.8, 28.7, 16.2; **IR ν (neat, cm<sup>-1</sup>):** 3349, 3048, 2919, 2850, 2341, 1659, 1641, 1592, 1589, 1509, 1483, 1031, 901, 668; **HRMS (ESI, m/z):** calcd for C<sub>26</sub>H<sub>25</sub>N<sub>2</sub>O<sup>+</sup> [M+H]<sup>+</sup>: 381.1961; found: 381.1959.

## V. Further Transformations

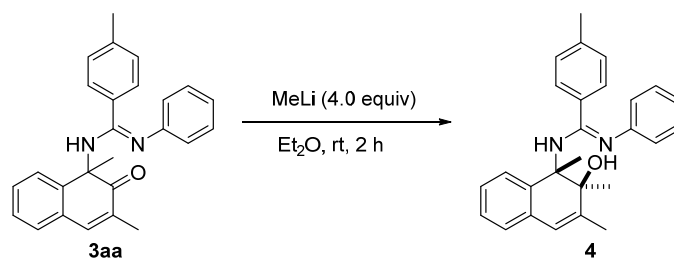

Compound **4** was prepared according to the reported procedures<sup>[7]</sup>.

To a solution of **3aa** (0.2 mmol, 76 mg) in anhydrous diethyl ether (5 mL), methyl lithium (0.27 mL, 3 M in Et<sub>2</sub>O, 0.8 mmol, 4.0 equiv) was added at 0 °C. The reaction was then stirred at room temperature for 2 h. The reaction was quenched with water and extracted with ethyl acetate for three times. The combined organic extracts were dried over MgSO<sub>4</sub> and concentrated in a vacuum. The crude product was purified by column chromatography (petroleum ether/ethylacetate = 10:1) to give **4**. Yield: 89%, 71 mg; White solid, m.p. 231-234 °C; **<sup>1</sup>H NMR (400 MHz, Chloroform-*d*)** δ 8.93 (s, 1H), 7.57 – 7.52 (m, 1H), 7.31 (d, *J* = 7.6 Hz, 2H), 7.22 (t, *J* = 3.6 Hz, 2H), 7.13 (d, *J* = 8.0 Hz, 2H), 7.08 (t, *J* = 7.2 Hz, 2H), 7.03 – 7.00 (m, 1H), 6.87 (t, *J* = 7.2 Hz, 1H), 6.73 (d, *J* = 8.0 Hz, 2H), 6.06 (s, 1H), 5.39 (s, 1H), 2.33 (s, 3H), 2.05 (s, 3H), 1.83 (s, 3H), 1.31 (s, 3H); **<sup>13</sup>C{<sup>1</sup>H} NMR (101 MHz, Chloroform-*d*)** δ 159.1, 148.0, 145.8, 141.9, 140.4, 133.0, 132.2, 129.4, 129.0, 128.5, 127.9, 127.2, 126.5, 123.5, 122.6, 122.3, 120.0, 78.9, 68.1, 23.9, 21.5, 21.3, 18.1; **HRMS (ESI, m/z):** calcd for C<sub>26</sub>H<sub>27</sub>N<sub>2</sub>O<sup>+</sup> [M+H]<sup>+</sup>:



397.2274; found: 397.2279.

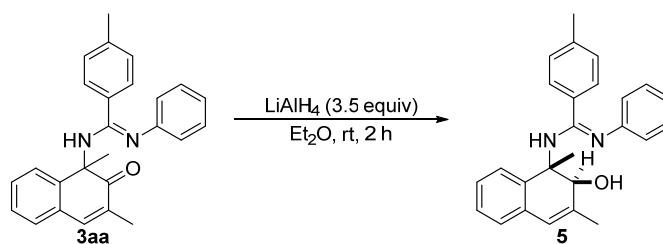

Compound **5** was prepared according to the reported procedures<sup>[8]</sup>.

To a solution of **3aa** (0.4 mmol, 152 mg) in anhydrous diethyl ether (5 mL), LiAlH<sub>4</sub> (1.4 mmol, 53.1 mg) was added slowly at 0 °C. The suspension was stirred at room temperature for 2 h. Then the mixture was quenched with water and was extracted with ethyl acetate for three times. The combined organic extracts were dried over MgSO<sub>4</sub> and concentrated in a vacuum. The crude product was purified by column chromatography (petroleum ether/ethylacetate = 10:1) to give **5**. Yield: 37%, 57 mg; White solid, m.p. 226-228 °C; <sup>1</sup>H NMR (400 MHz, Chloroform-*d*) δ 7.60 – 7.54 (m, 1H), 7.28 (s, 1H), 7.23 (dd, *J* = 6.0, 3.1 Hz, 2H), 7.16 (t, *J* = 7.6 Hz, 1H), 7.12 – 7.05 (m, 4H), 7.02 (t, *J* = 4.2 Hz, 1H), 6.86 (t, *J* = 7.4 Hz, 1H), 6.69 (t, *J* = 7.4 Hz, 3H), 6.13 (s, 1H), 5.39 (s, 1H), 5.11 (s, 1H), 2.32 (s, 3H), 2.06 (s, 3H), 1.77 (s, 3H); <sup>13</sup>C{<sup>1</sup>H} NMR (101 MHz, Chloroform-*d*) δ 158.8, 148.3, 140.9, 140.8, 140.2, 133.0, 132.0, 129.3, 129.0, 128.5, 128.0, 127.2, 126.4, 123.4, 123.3, 122.1, 121.3, 79.2, 65.1, 21.4, 20.1, 19.1; HRMS (ESI, *m/z*): calcd for C<sub>26</sub>H<sub>27</sub>N<sub>2</sub>O<sup>+</sup> [M+H]<sup>+</sup>: 383.2118; found: 383.2127.

## VI. Mechanistic Experiments

### (a) Control Experiments

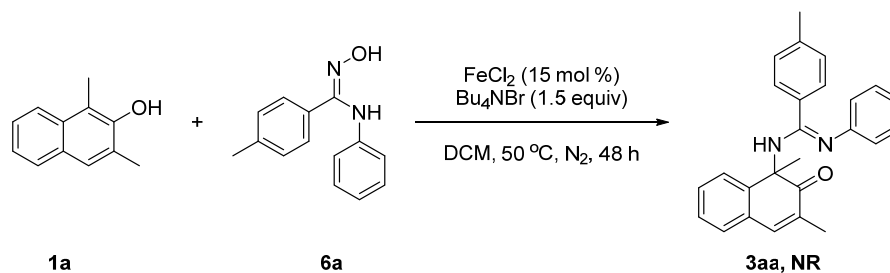

To a 20 mL over-dried and sealed flask were added **1a** (0.1 mmol), **6a** (0.11 mmol), FeCl<sub>2</sub> (0.015 mmol), <sup>n</sup>Bu<sub>4</sub>NBr (0.15 mmol) and anhydrous CH<sub>2</sub>Cl<sub>2</sub> (2 ml) under N<sub>2</sub>

atmosphere. After stirring at 50 °C for 48 hours, the reaction did not work monitored by TLC.

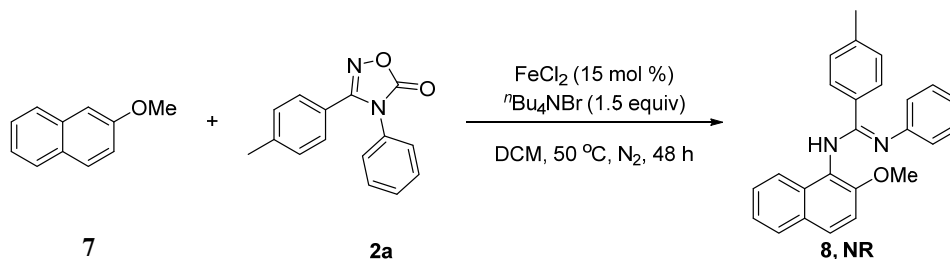

To a 20 mL over-dried and sealed flask were added **7** (0.1 mmol), **2a** (0.11 mmol), FeCl<sub>2</sub> (15 mol %, 0.015 mmol), <sup>t</sup>Bu<sub>4</sub>NBr (0.15 mmol) and anhydrous CH<sub>2</sub>Cl<sub>2</sub> (2 mL) under N<sub>2</sub> atmosphere. After stirring at 50 °C for 48 hours, the reaction did not work monitored by TLC.

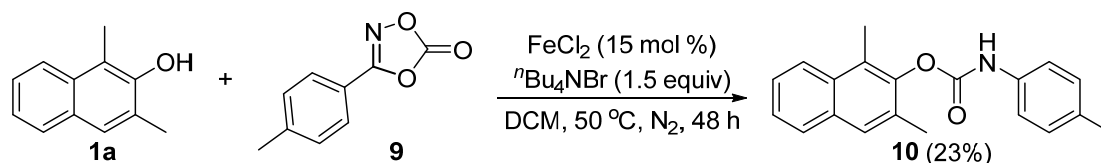

To a 20 mL over-dried and sealed flask were added **1a** (0.1 mmol), **9** (0.11 mmol), FeCl<sub>2</sub> (15 mol %, 0.015 mmol), <sup>t</sup>Bu<sub>4</sub>NBr (0.15 mmol) and anhydrous CH<sub>2</sub>Cl<sub>2</sub> (2 mL) under N<sub>2</sub> atmosphere. After stirring at 50 °C for 48 hours, the reaction mixture was purified by column chromatography via silica gel to afford the product **10** (0.023 mmol, 7.1 mg, 23% yield). **1,3-dimethylnaphthalen-2-yl p-tolylcarbamate (10)**, oil; <sup>1</sup>H NMR (400 MHz, Chloroform-*d*) δ 7.96 (d, *J* = 8Hz, 1H), 7.77 (d, *J* = 12Hz, 1H), 7.57 (s, 1H), 7.50 - 7.42 (m, 2H), 7.37 (d, *J* = 8Hz, 2H), 7.14 (d, *J* = 8Hz, 2H), 7.08 (brs, 1H), 2.56 (s, 3H), 2.41 (s, 3H), 2.32 (s, 3H).

#### (b) Radical inhibition reactions

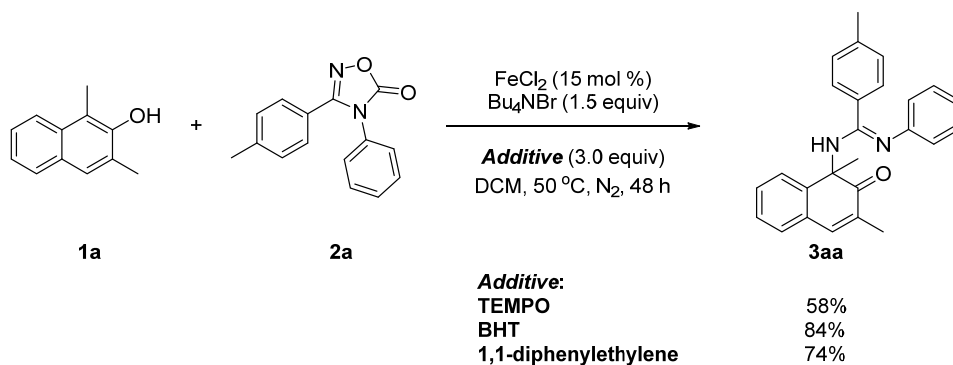

To a 20 mL over-dried and sealed flask were added **1a** (0.1 mmol), **2a** (0.11 mmol),  $\text{FeCl}_2$  (15 mol %, 0.015 mmol),  $\text{Bu}_4\text{NBr}$  (0.15 mmol), radical scavenger (3 equiv, 0.3 mmol) and anhydrous  $\text{CH}_2\text{Cl}_2$  (3 ml) under  $\text{N}_2$  atmosphere. The solution was stirred at 50 °C for 48 hours as monitoring by TLC. Upon completion, the crude product was purified by column chromatography via silica gel to afford the desired product **3aa**.

## VII. Crystallographic Data

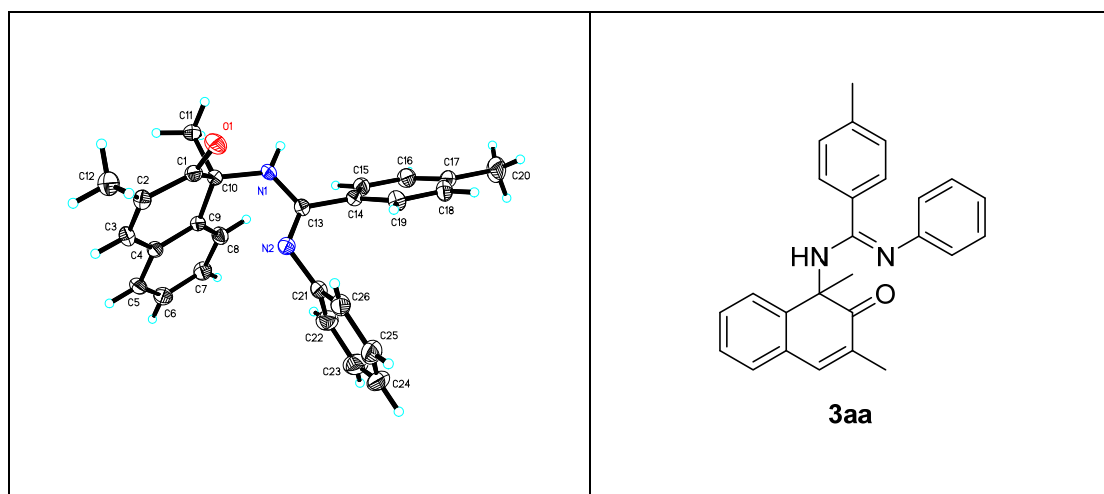

**Table S4.** Crystal data and structure refinement for **3aa**

|                      |                                                  |                              |
|----------------------|--------------------------------------------------|------------------------------|
| Identification code  | mo_ddz20013_0m                                   |                              |
| Empirical formula    | C <sub>26</sub> H <sub>24</sub> N <sub>2</sub> O |                              |
| Formula weight       | 380.47                                           |                              |
| Temperature          | 293(2) K                                         |                              |
| Wavelength           | 0.71073 Å                                        |                              |
| Crystal system       | Monoclinic                                       |                              |
| Space group          | P 21                                             |                              |
| Unit cell dimensions | a = 12.6708(10) Å                                | $\alpha = 90^\circ$ .        |
|                      | b = 6.6613(5) Å                                  | $\beta = 108.489(2)^\circ$ . |
|                      | c = 12.8991(11) Å                                | $\gamma = 90^\circ$ .        |

|                                   |                                             |
|-----------------------------------|---------------------------------------------|
| Volume                            | 1032.54(14) Å <sup>3</sup>                  |
| Z                                 | 2                                           |
| Density (calculated)              | 1.224 Mg/m <sup>3</sup>                     |
| Absorption coefficient            | 0.075 mm <sup>-1</sup>                      |
| F(000)                            | 404                                         |
| Crystal size                      | 0.200 x 0.120 x 0.090 mm <sup>3</sup>       |
| Theta range for data collection   | 2.727 to 25.991°.                           |
| Index ranges                      | -15<=h<=15, -8<=k<=8, -15<=l<=13            |
| Reflections collected             | 9850                                        |
| Independent reflections           | 4023 [R(int) = 0.0270]                      |
| Completeness to theta = 25.242°   | 99.9 %                                      |
| Absorption correction             | Semi-empirical from equivalents             |
| Max. and min. transmission        | 0.7456 and 0.6347                           |
| Refinement method                 | Full-matrix least-squares on F <sup>2</sup> |
| Data / restraints / parameters    | 4023 / 1 / 266                              |
| Goodness-of-fit on F <sup>2</sup> | 1.077                                       |
| Final R indices [I>2sigma(I)]     | R1 = 0.0434, wR2 = 0.0928                   |
| R indices (all data)              | R1 = 0.0579, wR2 = 0.1035                   |
| Absolute structure parameter      | -0.1(9)                                     |
| Extinction coefficient            | 0.038(5)                                    |
| Largest diff. peak and hole       | 0.165 and -0.153 e.Å <sup>-3</sup>          |

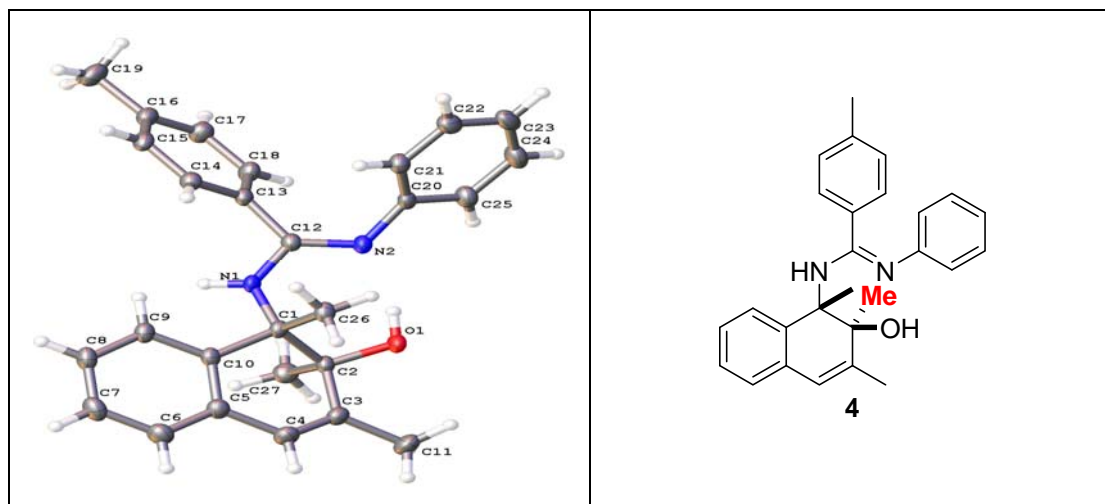

**Table S5.** Crystal data and structure refinement for **4**

|                     |                                                  |
|---------------------|--------------------------------------------------|
| Identification code | 210512fyh_1_0m                                   |
| Empirical formula   | C <sub>27</sub> H <sub>28</sub> N <sub>2</sub> O |
| Formula weight      | 396.51                                           |
| Temperature         | 193.0 K                                          |
| Wavelength          | 1.34139 Å                                        |

|                                   |                                             |                  |
|-----------------------------------|---------------------------------------------|------------------|
| Crystal system                    | Triclinic                                   |                  |
| Space group                       | P-1                                         |                  |
| Unit cell dimensions              | a = 9.5678(8) Å                             | α = 99.125(3)°.  |
|                                   | b = 10.2437(8) Å                            | β = 106.904(3)°. |
|                                   | c = 12.1688(9) Å                            | γ = 96.828(3)°.  |
| Volume                            | 1109.37(15) Å <sup>3</sup>                  |                  |
| Z                                 | 2                                           |                  |
| Density (calculated)              | 1.187 Mg/m <sup>3</sup>                     |                  |
| Absorption coefficient            | 0.359 mm <sup>-1</sup>                      |                  |
| F(000)                            | 424                                         |                  |
| Crystal size                      | 0.07 x 0.06 x 0.05 mm <sup>3</sup>          |                  |
| Theta range for data collection   | 3.862 to 54.923°.                           |                  |
| Index ranges                      | -11 ≤ h ≤ 11, -9 ≤ k ≤ 12, -14 ≤ l ≤ 14     |                  |
| Reflections collected             | 11819                                       |                  |
| Independent reflections           | 4093 [R(int) = 0.0433]                      |                  |
| Completeness to theta = 53.594°   | 97.5 %                                      |                  |
| Absorption correction             | Semi-empirical from equivalents             |                  |
| Max. and min. transmission        | 0.7508 and 0.5667                           |                  |
| Refinement method                 | Full-matrix least-squares on F <sup>2</sup> |                  |
| Data / restraints / parameters    | 4093 / 0 / 276                              |                  |
| Goodness-of-fit on F <sup>2</sup> | 1.059                                       |                  |
| Final R indices [I > 2σ(I)]       | R1 = 0.0577, wR2 = 0.1591                   |                  |
| R indices (all data)              | R1 = 0.0660, wR2 = 0.1695                   |                  |
| Extinction coefficient            | n/a                                         |                  |
| Largest diff. peak and hole       | 0.269 and -0.263 e.Å <sup>-3</sup>          |                  |

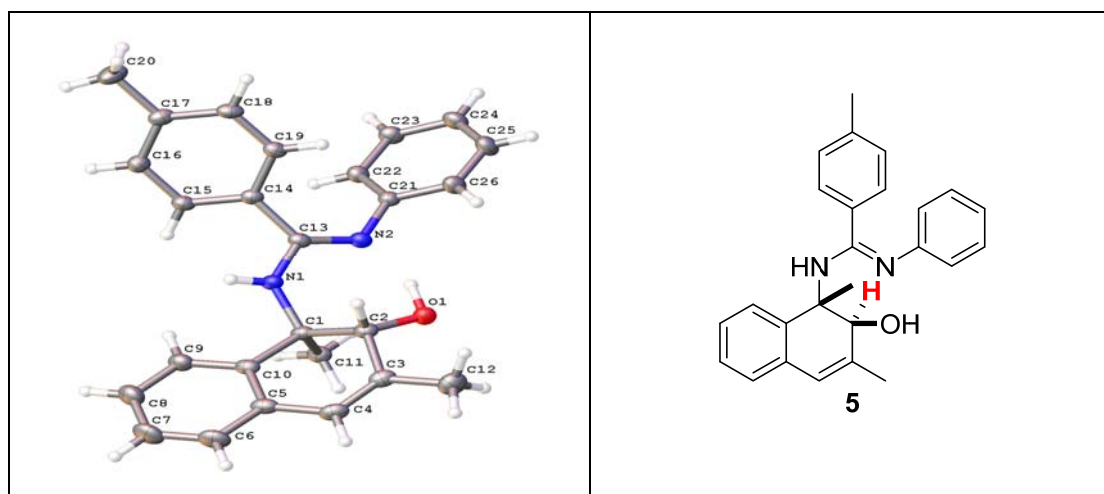

**Table S6.** Crystal data and structure refinement for **5**

Identification code 210512fyh\_2

|                                   |                                                  |          |
|-----------------------------------|--------------------------------------------------|----------|
| Empirical formula                 | C <sub>26</sub> H <sub>26</sub> N <sub>2</sub> O |          |
| Formula weight                    | 382.49                                           |          |
| Temperature                       | 192.99 K                                         |          |
| Wavelength                        | 1.34139 Å                                        |          |
| Crystal system                    | Orthorhombic                                     |          |
| Space group                       | Pbca                                             |          |
| Unit cell dimensions              | a = 19.3797(3) Å                                 | α = 90°. |
|                                   | b = 10.5232(2) Å                                 | β = 90°. |
|                                   | c = 20.7635(3) Å                                 | γ = 90°. |
| Volume                            | 4234.44(12) Å <sup>3</sup>                       |          |
| Z                                 | 8                                                |          |
| Density (calculated)              | 1.200 Mg/m <sup>3</sup>                          |          |
| Absorption coefficient            | 0.365 mm <sup>-1</sup>                           |          |
| F(000)                            | 1632                                             |          |
| Crystal size                      | 0.09 x 0.07 x 0.05 mm <sup>3</sup>               |          |
| Theta range for data collection   | 3.704 to 54.959°.                                |          |
| Index ranges                      | -23 ≤ h ≤ 23, -11 ≤ k ≤ 12, -25 ≤ l ≤ 25         |          |
| Reflections collected             | 43616                                            |          |
| Independent reflections           | 4018 [R(int) = 0.0406]                           |          |
| Completeness to theta = 53.594°   | 99.8 %                                           |          |
| Absorption correction             | Semi-empirical from equivalents                  |          |
| Max. and min. transmission        | 0.7508 and 0.6413                                |          |
| Refinement method                 | Full-matrix least-squares on F <sup>2</sup>      |          |
| Data / restraints / parameters    | 4018 / 0 / 269                                   |          |
| Goodness-of-fit on F <sup>2</sup> | 1.045                                            |          |
| Final R indices [I > 2σ(I)]       | R1 = 0.0398, wR2 = 0.0995                        |          |
| R indices (all data)              | R1 = 0.0475, wR2 = 0.1055                        |          |
| Extinction coefficient            | n/a                                              |          |
| Largest diff. peak and hole       | 0.272 and -0.252 e.Å <sup>-3</sup>               |          |

## VIII. References

- [1] T. Oguma and T. Katsuki, Iron-Catalyzed Dioxygen-Driven C-C Bond Formation: Oxidative Dearomatization of 2-Naphthols with Construction of a Chiral Quaternary Stereocenter, *J. Am. Chem. Soc.*, 2012, **134**, 20017-20020.
- [2] S.-G. Wang, X.-J. Liu, Q.-C. Zhao, C. Zheng, S.-B. Wang and S.-L. You, Asymmetric dearomatization of β-naphthols through a bifunctional-thiourea-catalyzed Michael reaction, *Angew. Chem., Int. Ed.*, 2015, **54**, 14929-14932.

- [3] T. Gerfaud, H.-L. Wei, L. Neuville and J. Zhu, Unexpected C-C Bond Cleavage: Synthesis of 1,2,4-Oxadiazol-5-ones from Amidoximes with Pentafluorophenyl or Trifluoromethyl Anion Acting as Leaving Group, *Org. Lett.*, 2011, **13**, 6172-6175.
- [4] S. V. Bhat, D. Robinson, J. E. Moses and P. Sharma, Synthesis of Oxadiazol-5-imines via the Cyclizative Capture of in Situ Generated Cyanamide Ions and Nitrile Oxides, *Org. Lett.*, 2016, **18**, 1100-1103.
- [5] W. Phakhodee, C. Duangkamol, N. Wiriya and M. Pattarawarapan, A convenient one-pot synthesis of N-substituted amidoximes and their application toward 1,2,4-oxadiazol-5-ones, *RSC Adv.*, 2018, **8**, 38281-38288.
- [6] Y. Zhao, Y. Hu, X. Li and B. Wan, Tf<sub>2</sub>NH-catalyzed formal [3 + 2] cycloaddition of oxadiazolones with ynamides: a simple access to aminoimidazoles, *Org. Biomol. Chem.*, 2017, **15**, 3413-3417.
- [7] S.-B. Tang, H.-F. Tu, X. Zhang and S.-L. You, Rhodium-Catalyzed Asymmetric Allylic Dearomatization of  $\beta$ -Naphthols: Enantioselective Control of Prochiral Nucleophiles, *Org. Lett.*, 2019, **21**, 6130-6134.
- [8] D. Yang, L. Wang, F. Han, D. Li, D. Zhao and R. Wang, Intermolecular Enantioselective Dearomatization Reaction of  $\beta$ -Naphthol Using meso-Aziridine: A Bifunctional In Situ Generated Magnesium Catalyst, *Angew. Chem., Int. Ed.*, 2015, **54**, 2185-2189.
- [9] [9]. Shou-Guo Wang.; Qin Yin.; Chun-Xiang Zhuo.; Shu-Li You., *Angew. Chem. Int. Ed.* **2015**, **54**, 647 –65

7.452  
7.445  
7.436  
7.428  
7.425  
7.418  
7.353  
7.347  
7.343  
7.331  
7.326  
7.321  
7.265  
7.260  
7.255  
7.244  
7.238  
7.234  
7.228  
7.223  
7.219  
7.212  
7.206

— 1.576

— 1.260

— 0.029

### IX. NMR Spectra of New Compounds (<sup>1</sup>H NMR, <sup>13</sup>C NMR)

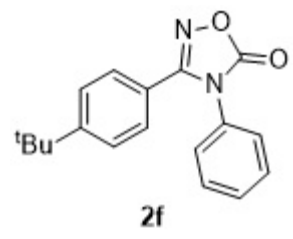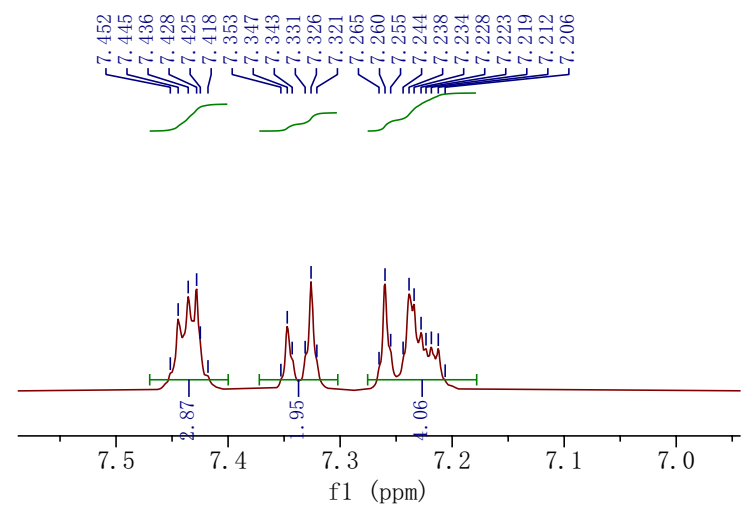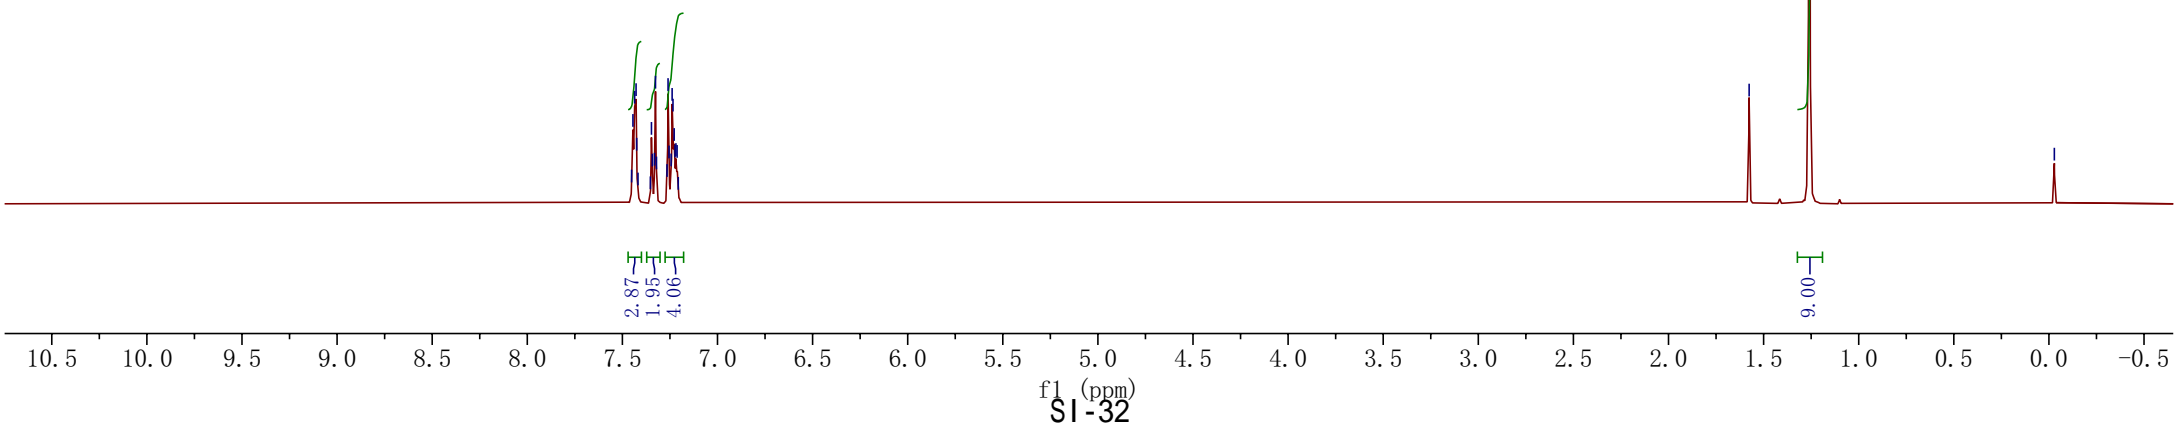



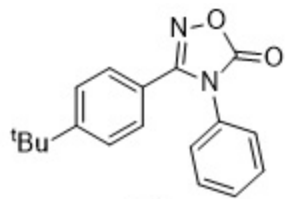

**2f**

158.429  
157.422  
155.515

132.112  
129.798  
129.527  
127.830  
126.974  
125.923  
119.991

77.479  
77.160  
76.842

34.977  
30.983

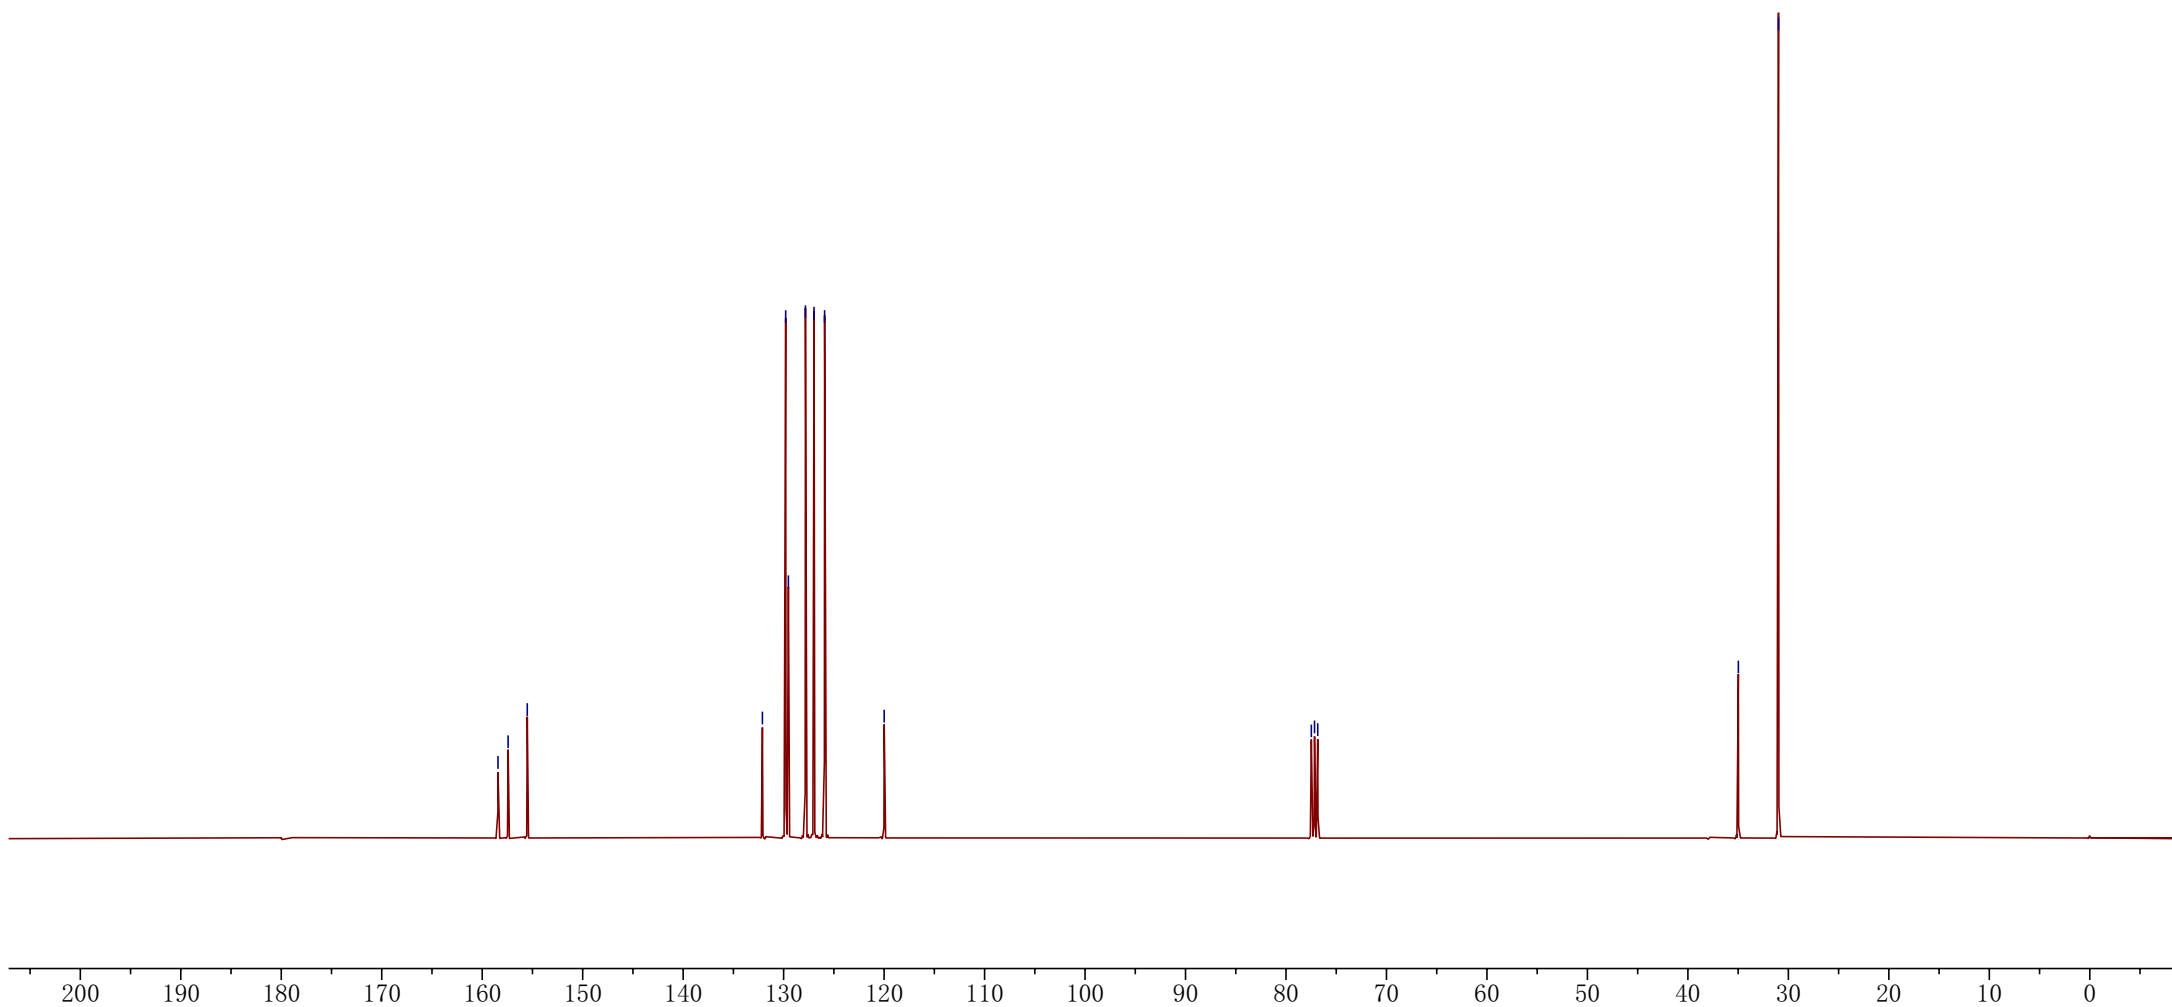

f1 (ppm)  
SI-33

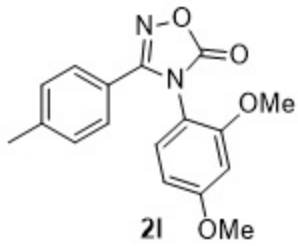

7.280  
7.260  
7.216  
7.194  
7.139  
7.120  
6.558  
6.553  
6.550  
6.535  
6.531  
6.528  
6.469

3.825  
3.605

2.334

0.003

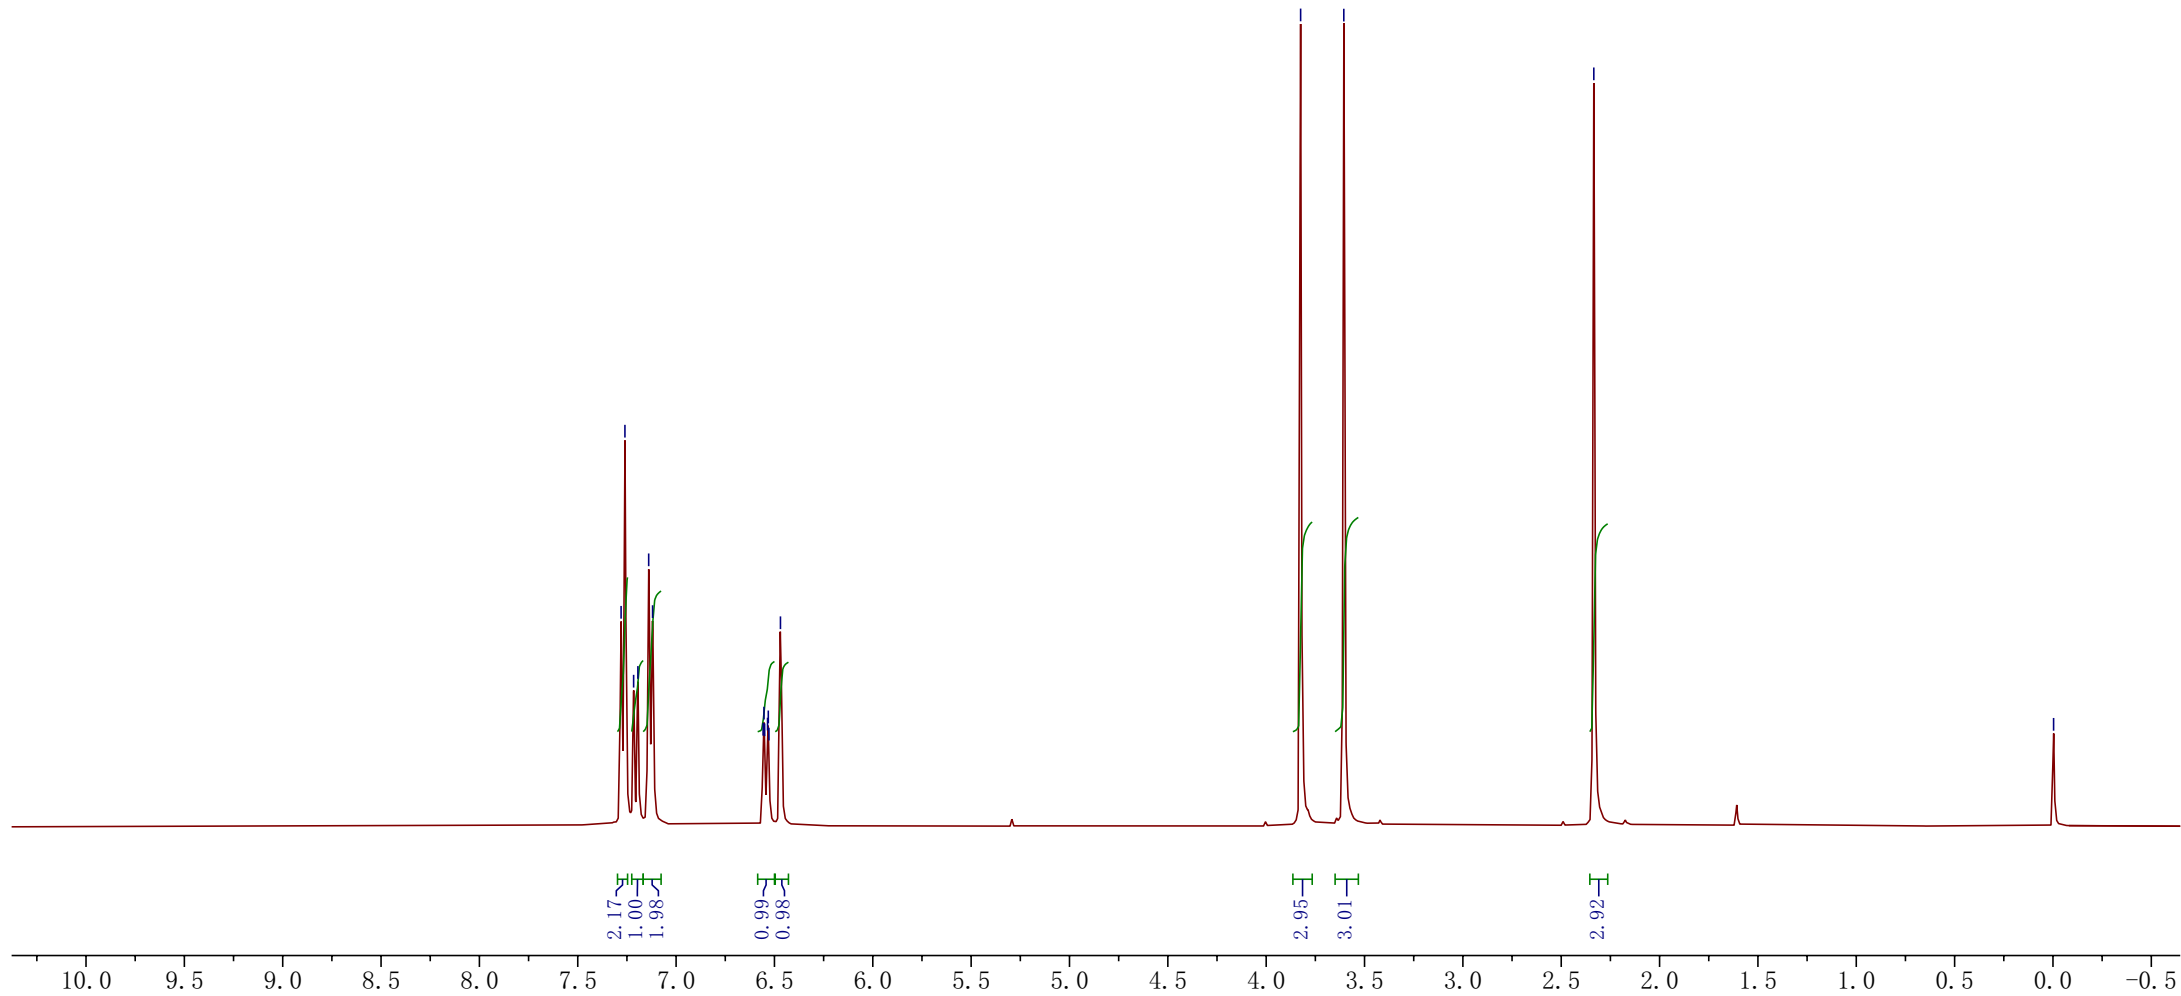

f1 (ppm)  
SI-34

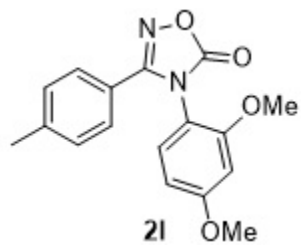

162.216  
158.907  
158.560  
155.955

142.044

129.862  
129.418  
127.167

120.873

113.530

105.304

99.721

77.478  
77.160  
76.841

55.660  
55.610

21.410

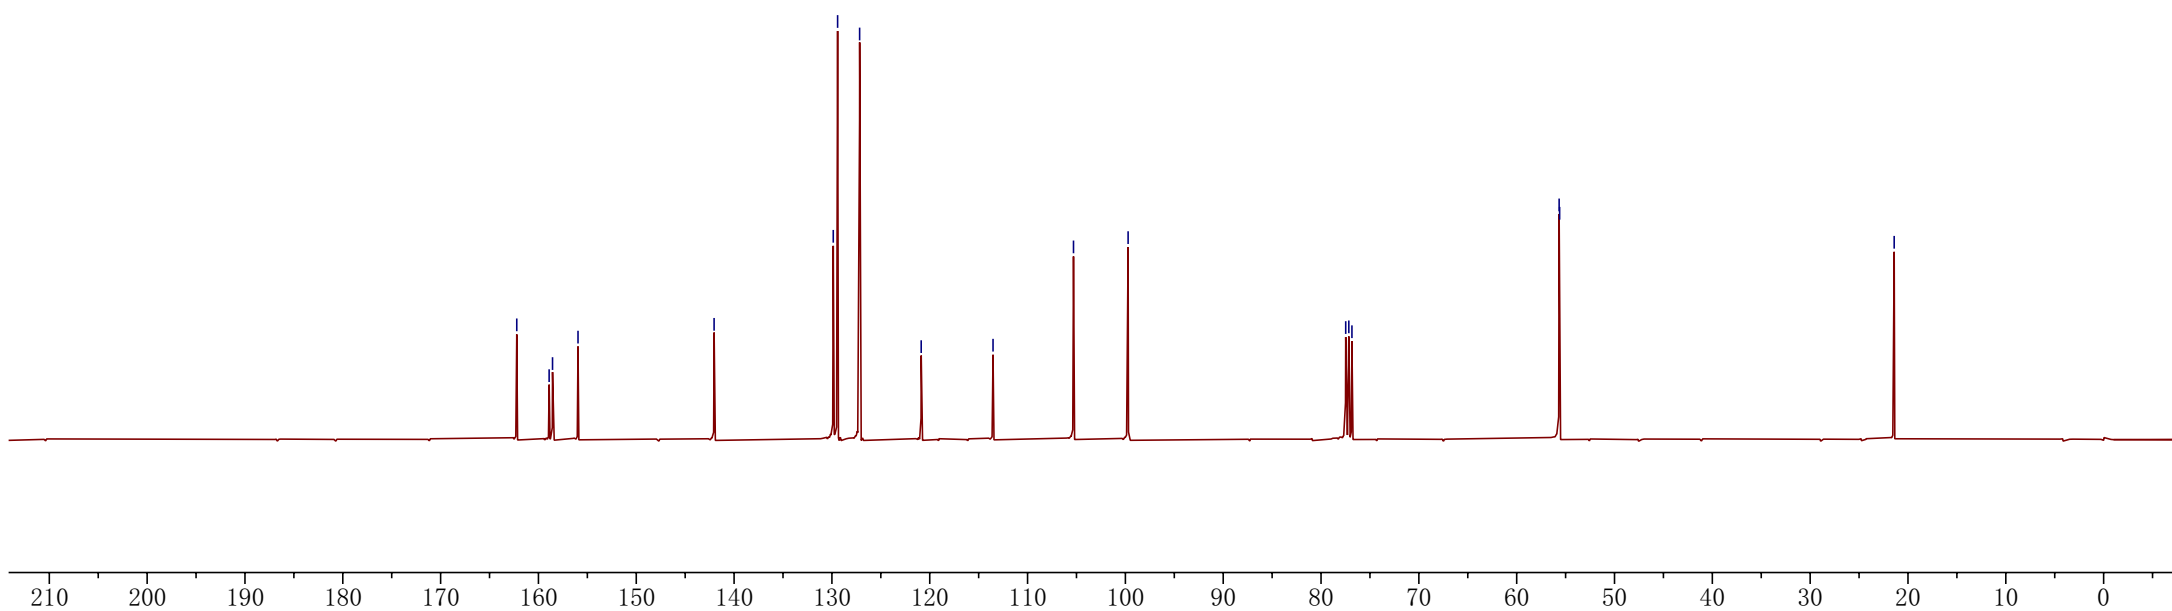

f1 (ppm)  
SI-35

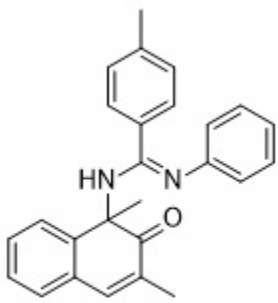

3aa

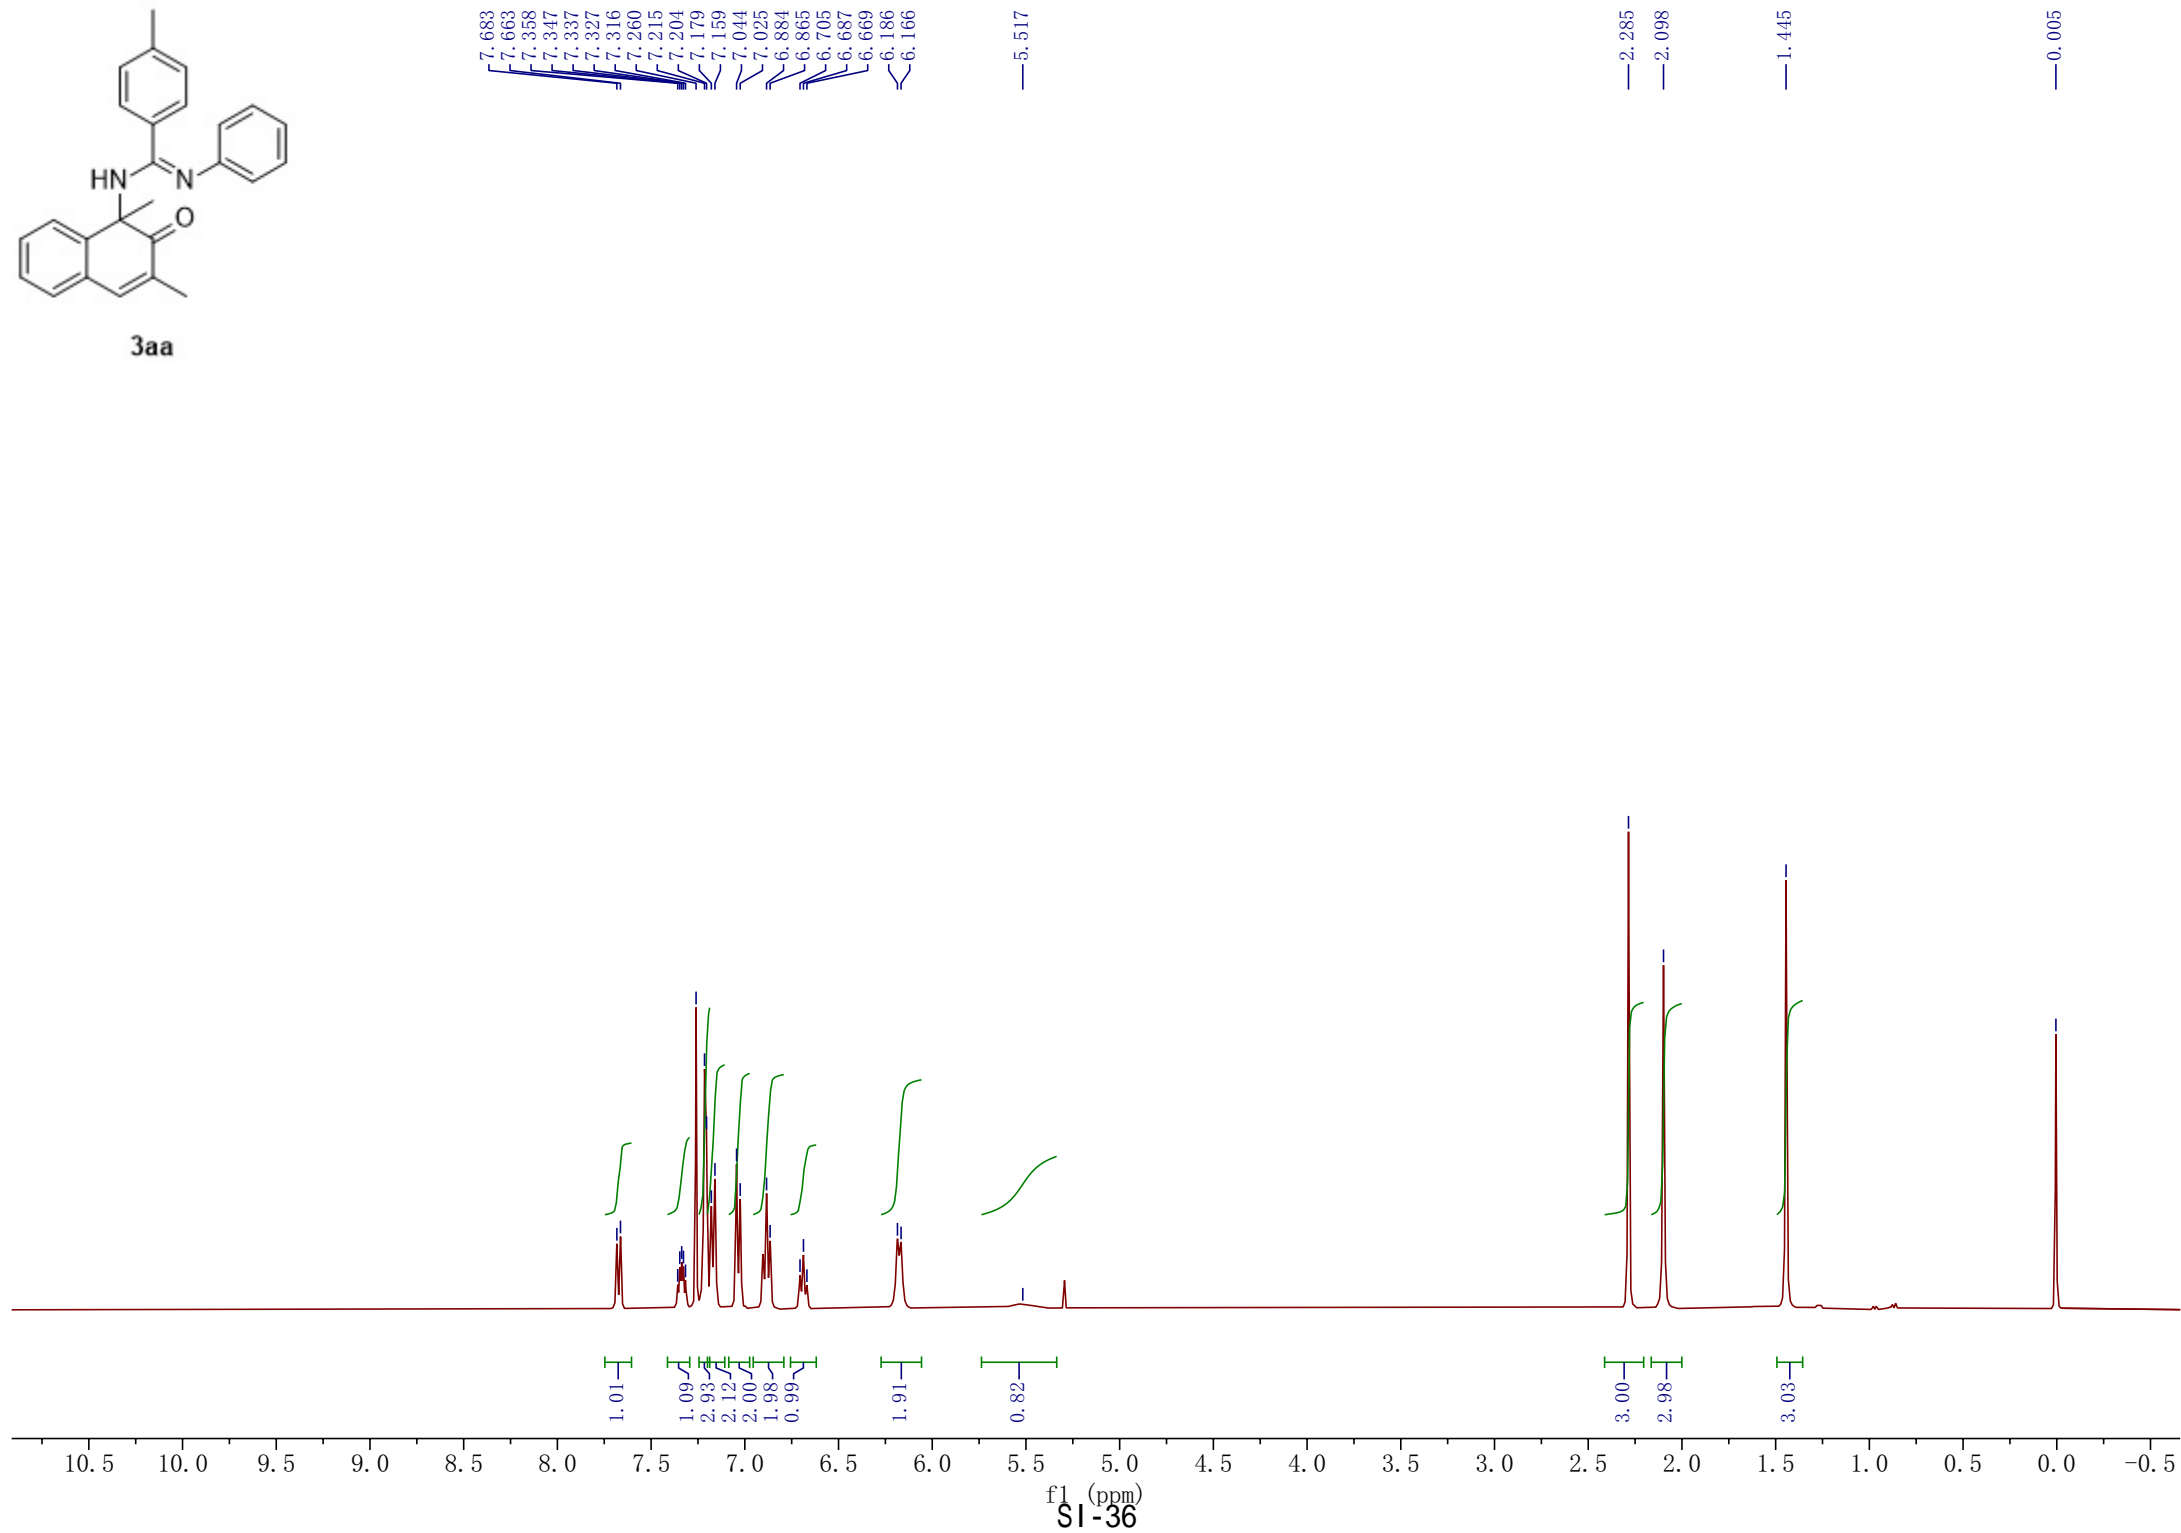

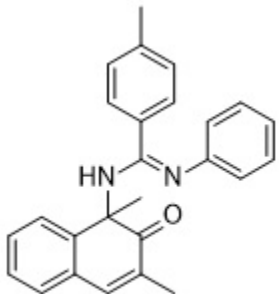

3aa

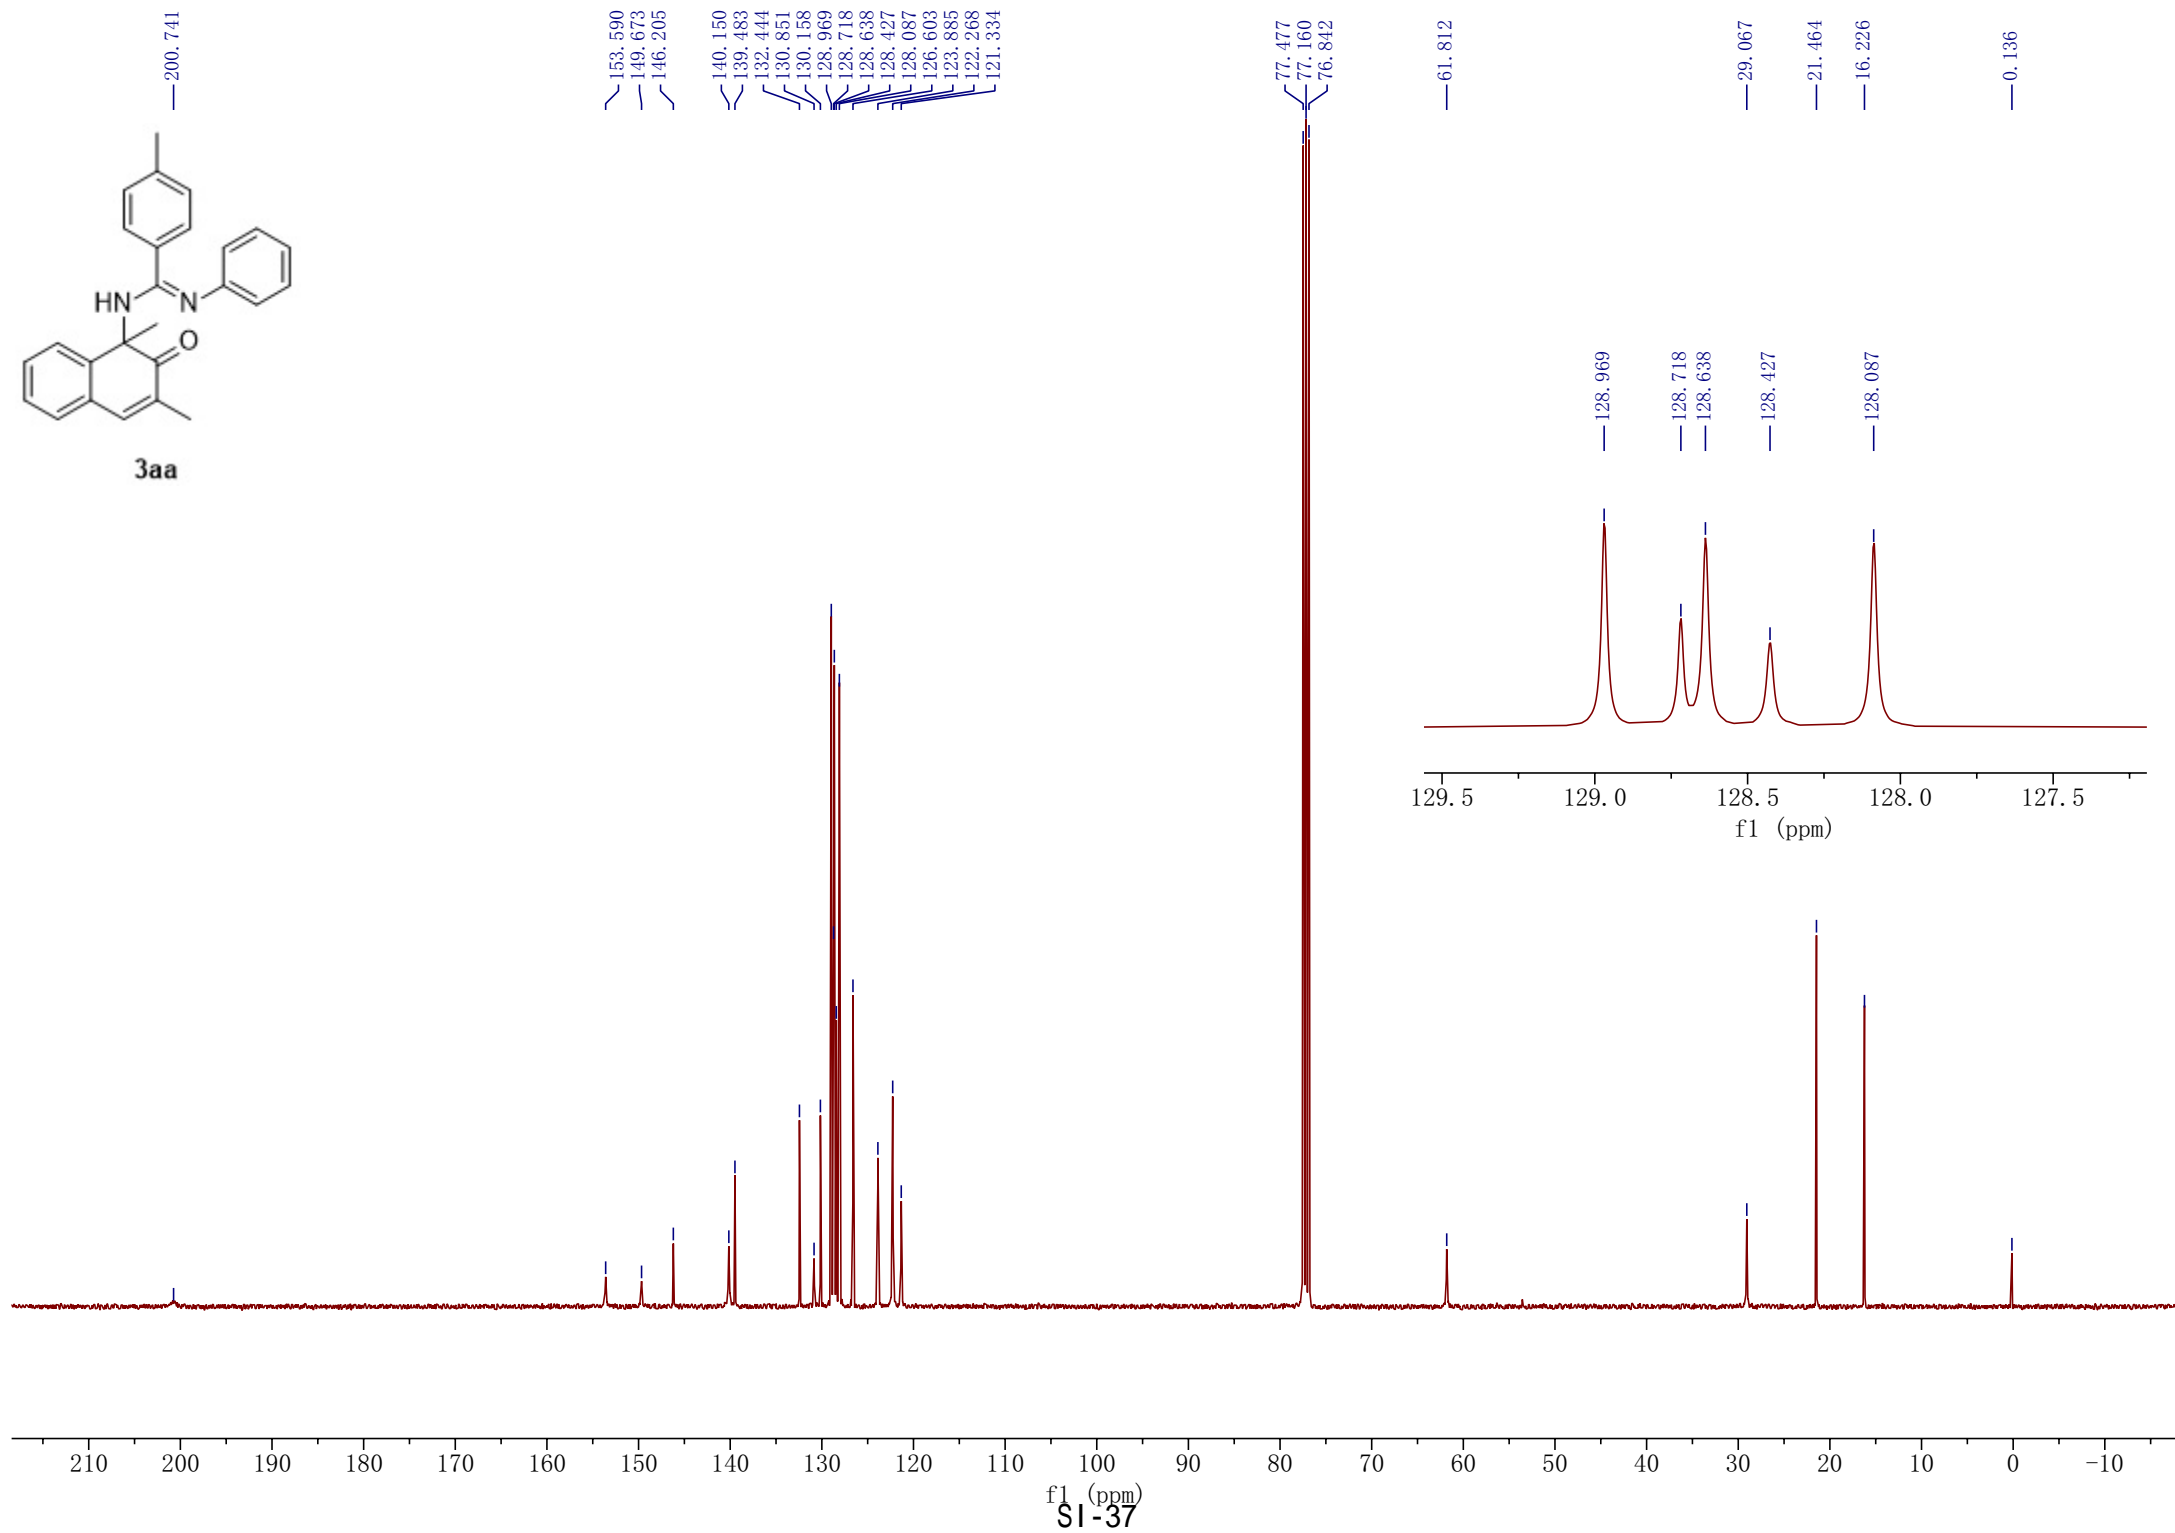

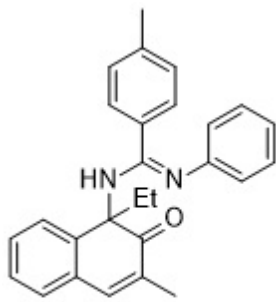

3ba

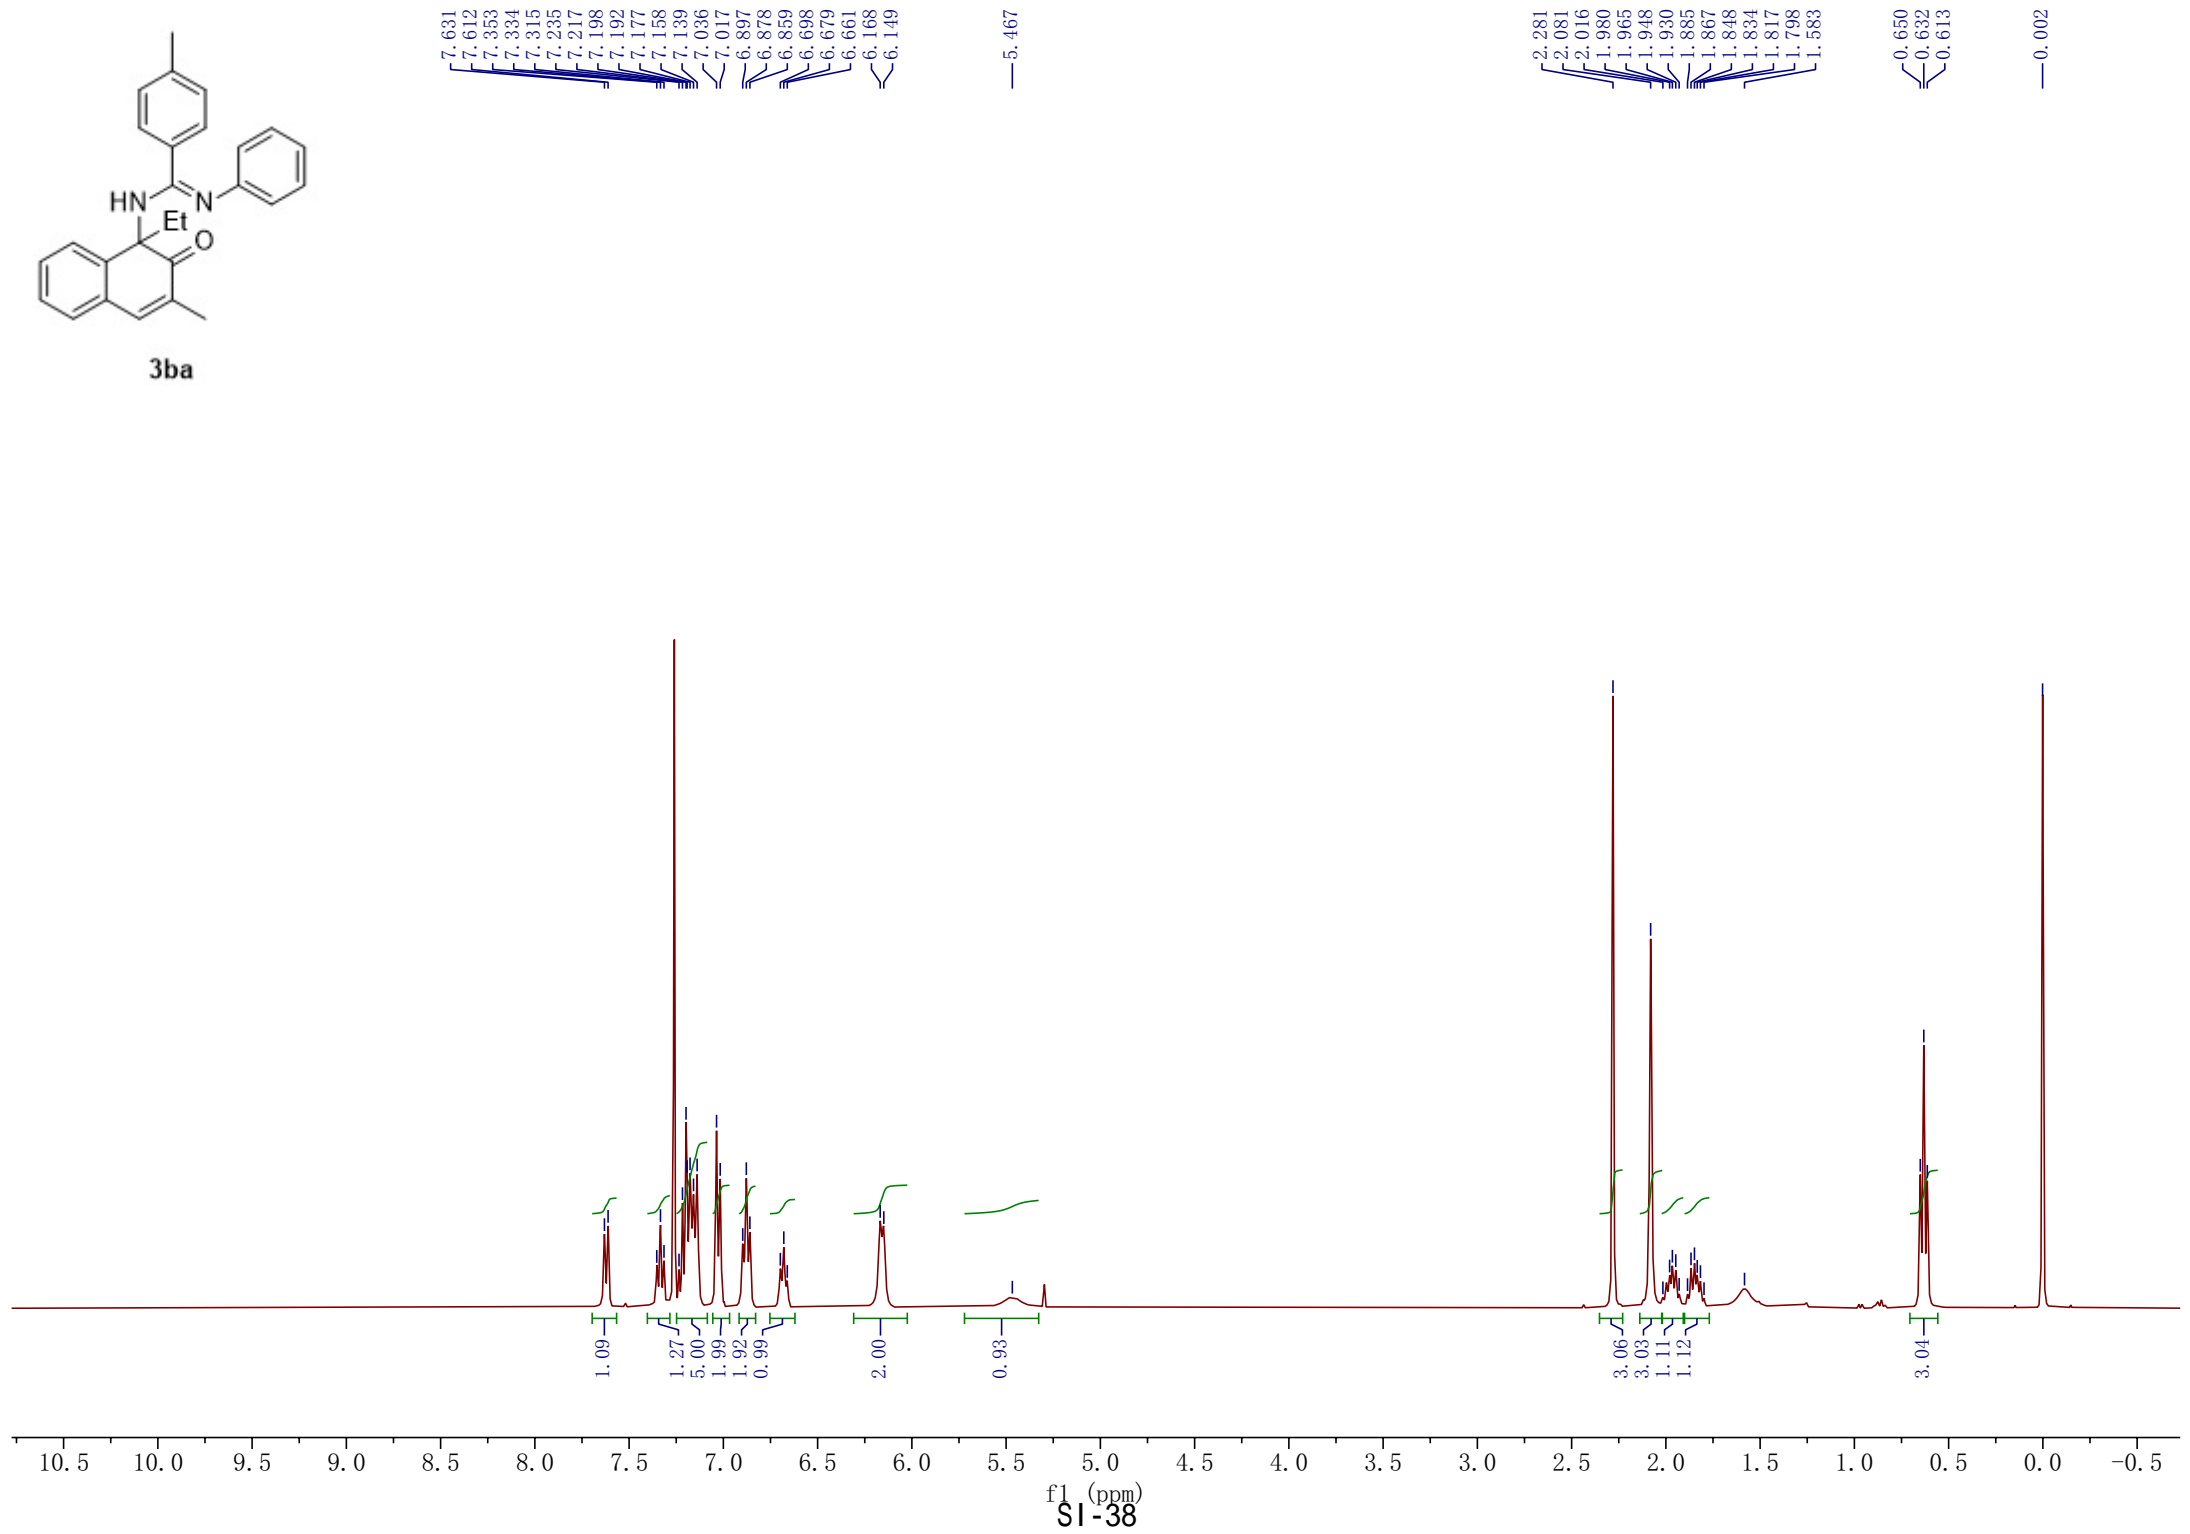

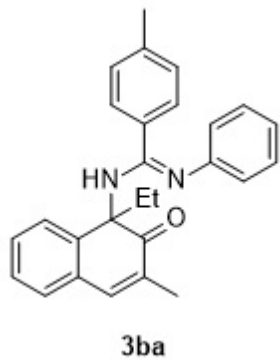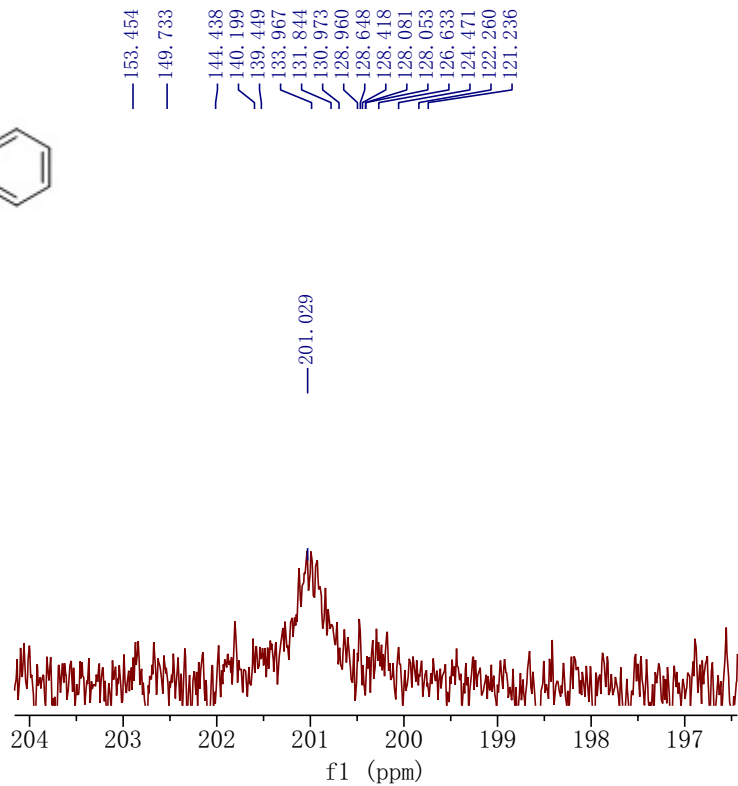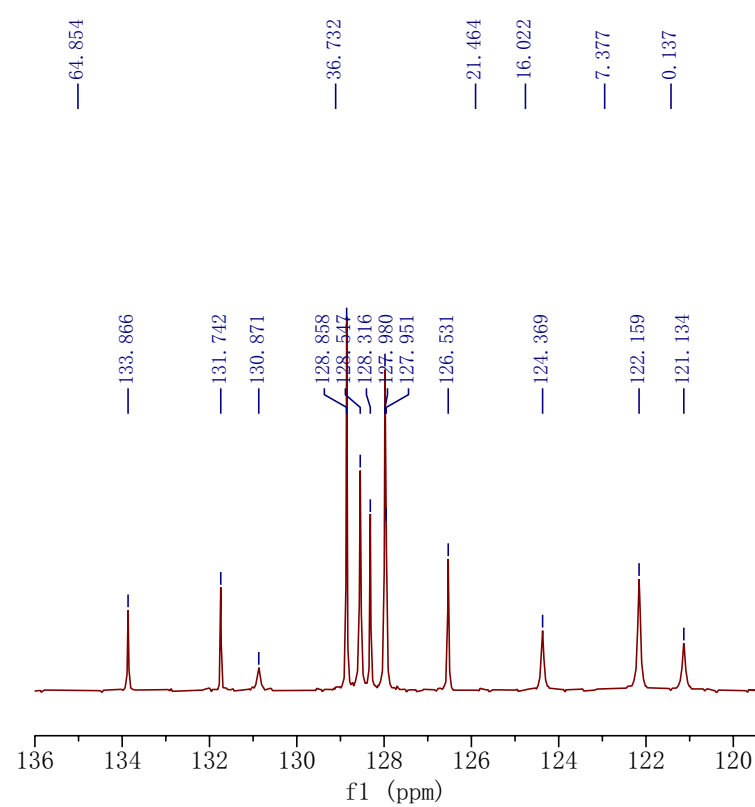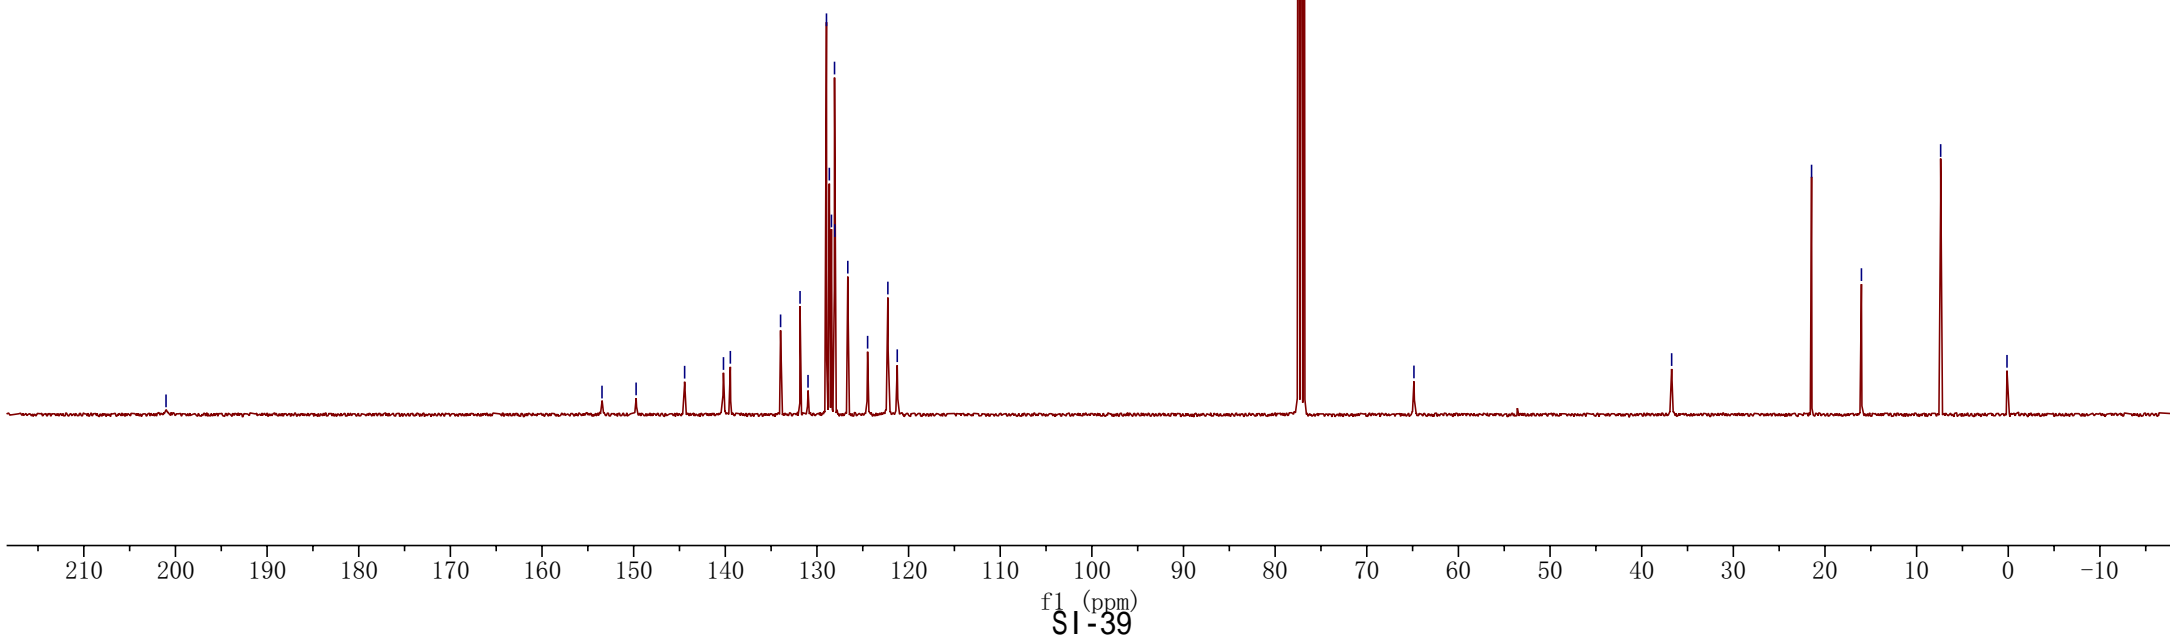

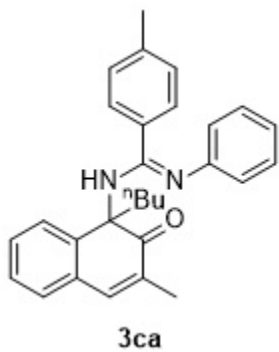

7.615  
7.348  
7.343  
7.328  
7.311  
7.307  
7.260  
7.213  
7.194  
7.188  
7.170  
7.153  
7.134  
7.034  
7.014  
6.893  
6.874  
6.855  
6.694  
6.675  
6.657  
6.160  
6.141

5.468

2.280  
2.081  
1.921  
1.911  
1.812  
1.800  
1.782  
1.771  
1.751  
1.740  
1.574  
1.146  
1.129  
1.112  
1.094  
1.077  
1.059  
1.042  
1.026  
1.013  
1.008  
0.959  
0.954  
0.942  
0.934  
0.924  
0.913  
0.904  
0.887  
0.873  
0.856  
0.755  
0.739  
0.720  
0.001

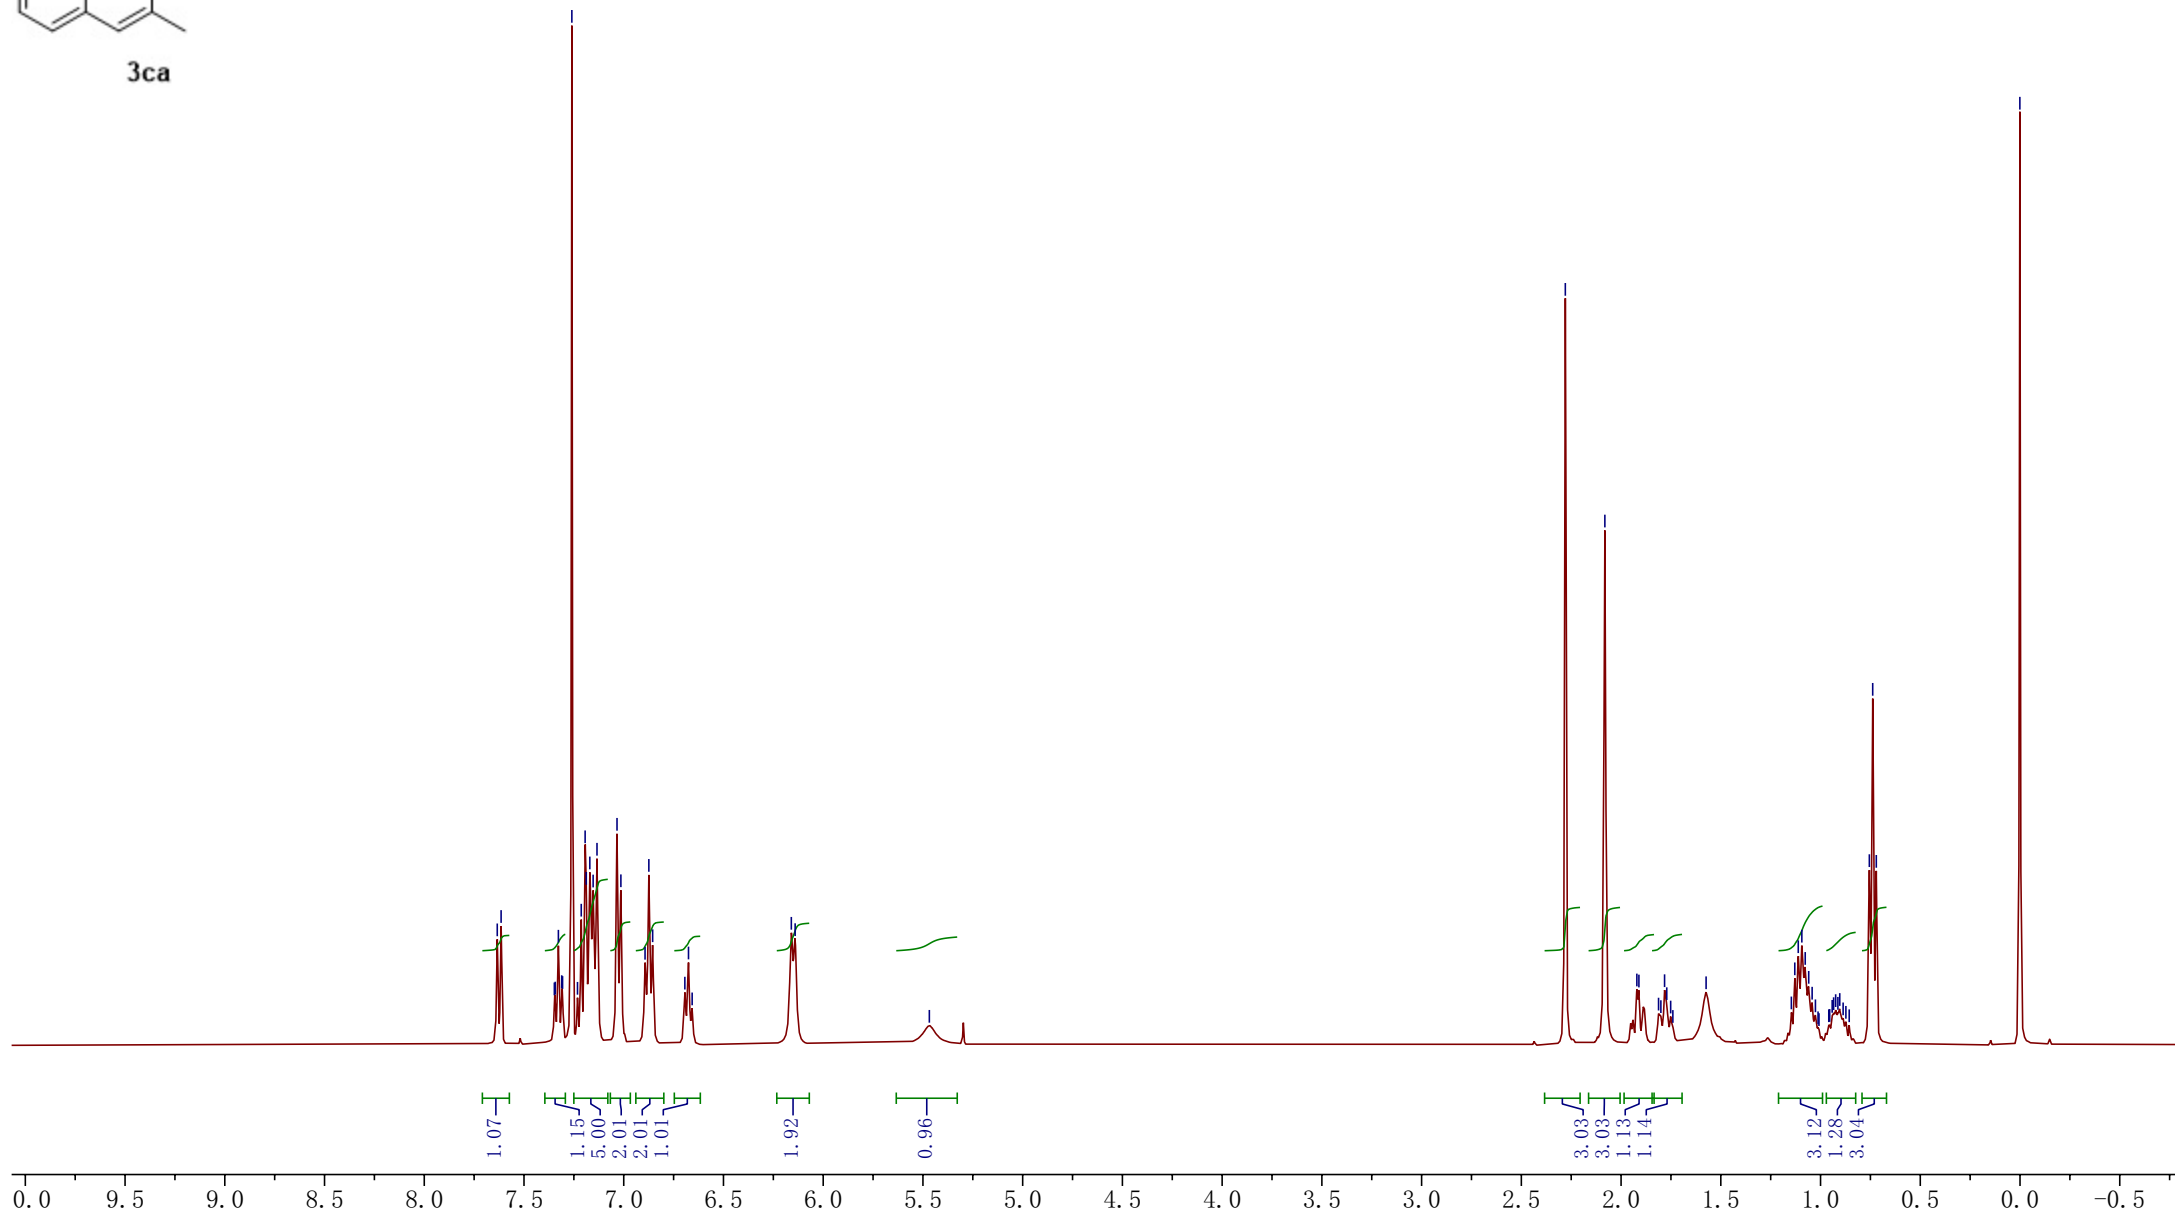

f1 (ppm)

SI-40



— 201.000

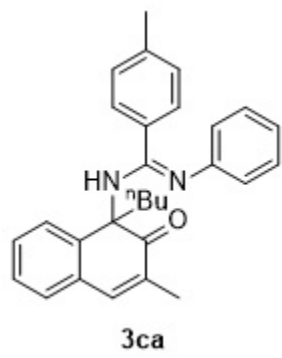

— 153.380  
— 149.726  
— 144.782  
— 140.144  
— 139.426  
— 133.785  
— 131.675  
— 130.978  
— 128.952  
— 128.631  
— 128.392  
— 128.066  
— 126.582  
— 124.434  
— 122.255  
— 121.221

— 77.477  
— 77.160  
— 76.843

— 64.516

— 43.502

— 24.609  
— 22.974  
— 21.458

— 16.060  
— 13.852

— 0.135

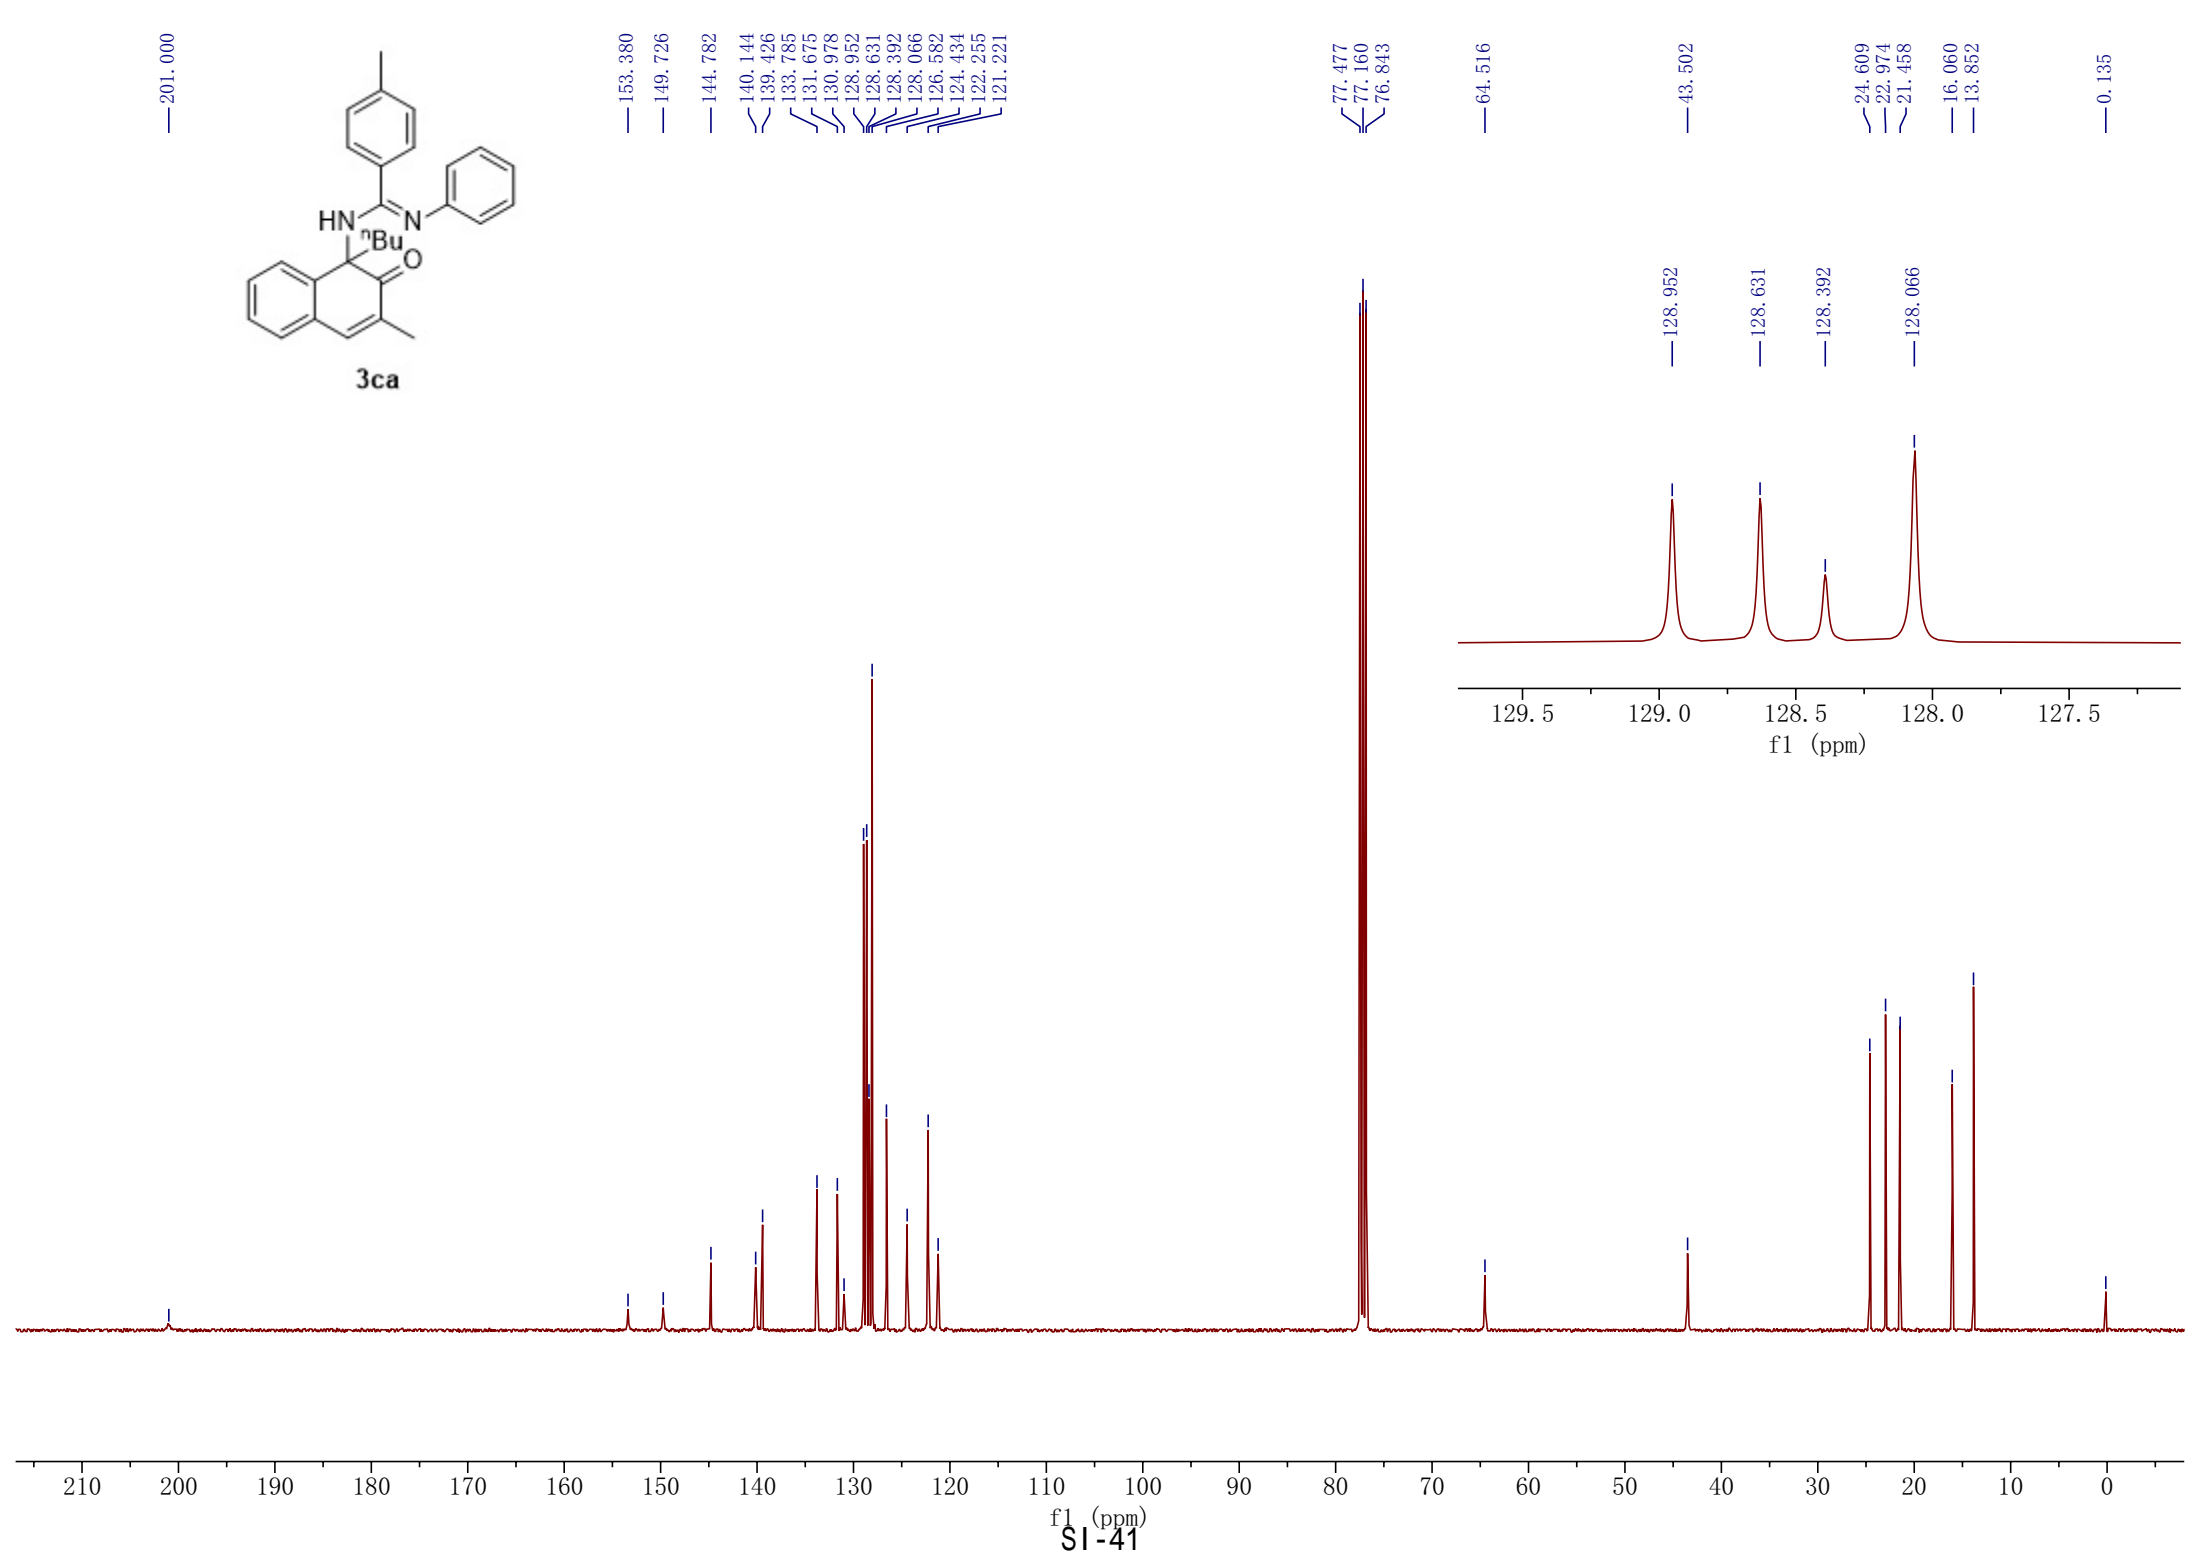

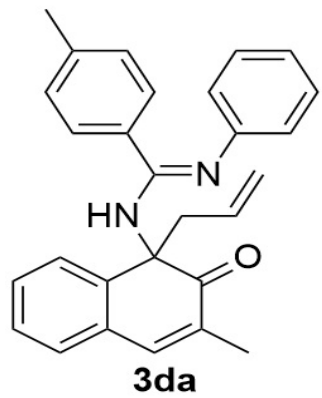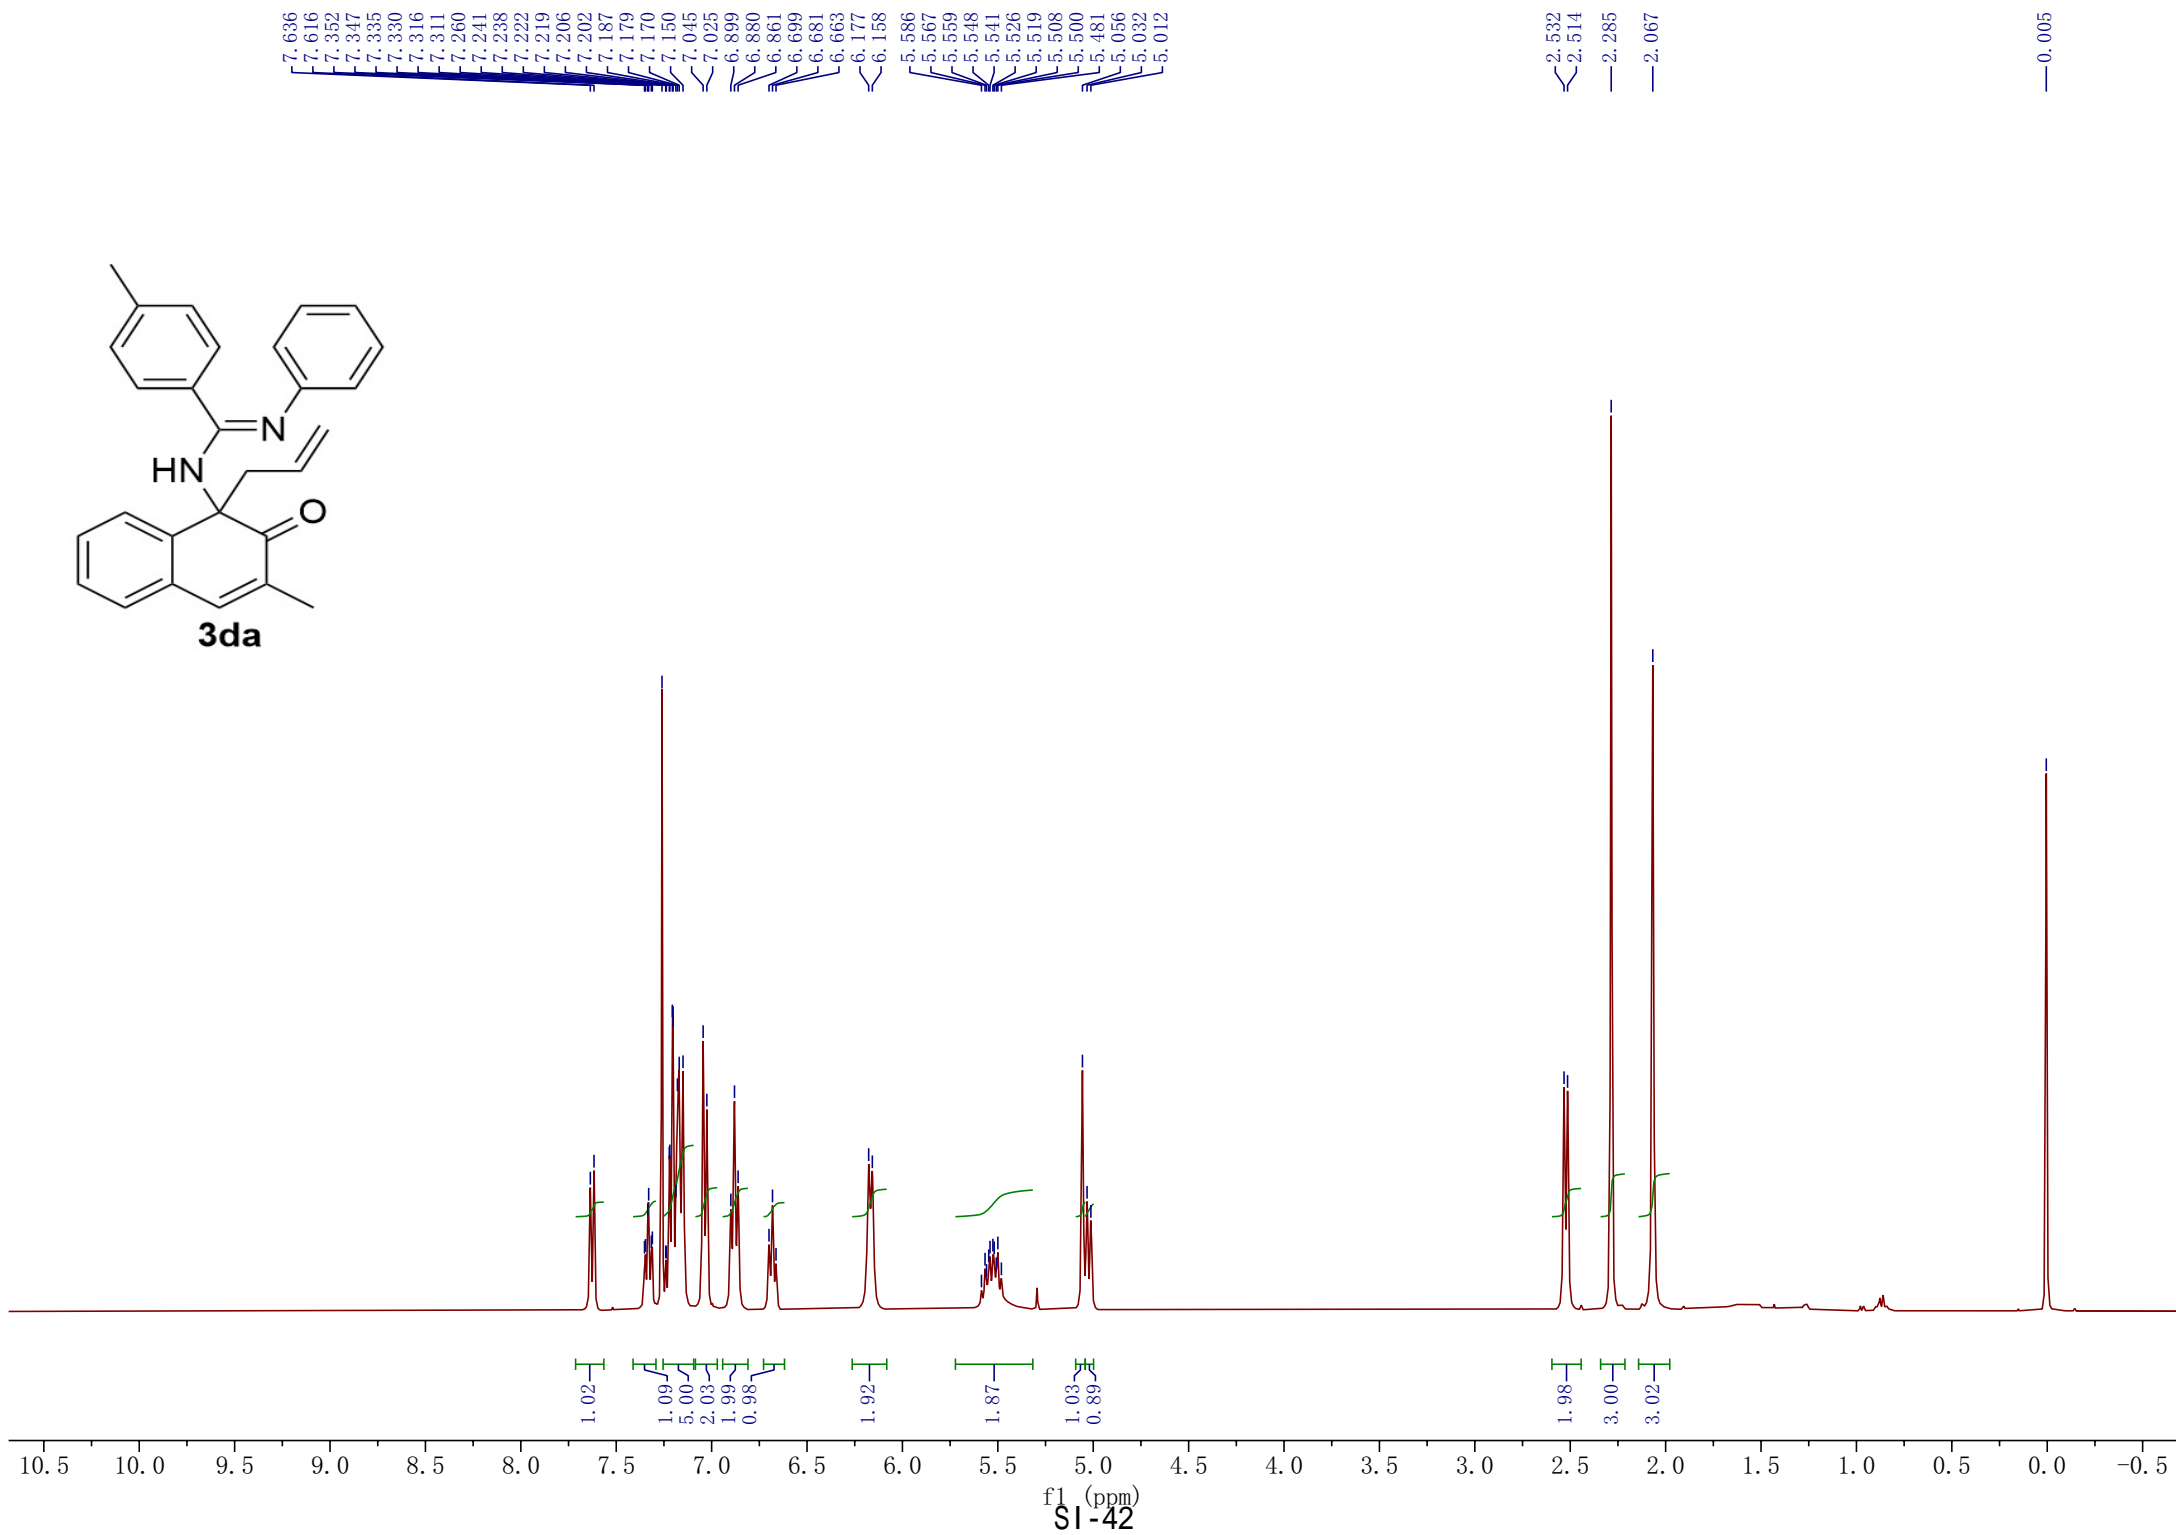

— 199.980

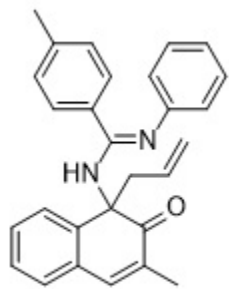

**3da**

— 153.377  
— 149.744  
— 144.369  
— 140.204  
— 139.431  
— 133.177  
— 131.039  
— 131.000  
— 128.988  
— 128.576  
— 128.373  
— 128.314  
— 128.071  
— 126.722  
— 124.533  
— 122.214  
— 121.264  
— 120.072

77.478  
77.160  
76.843

— 64.381

— 46.427

— 21.450

— 16.091

— 0.132

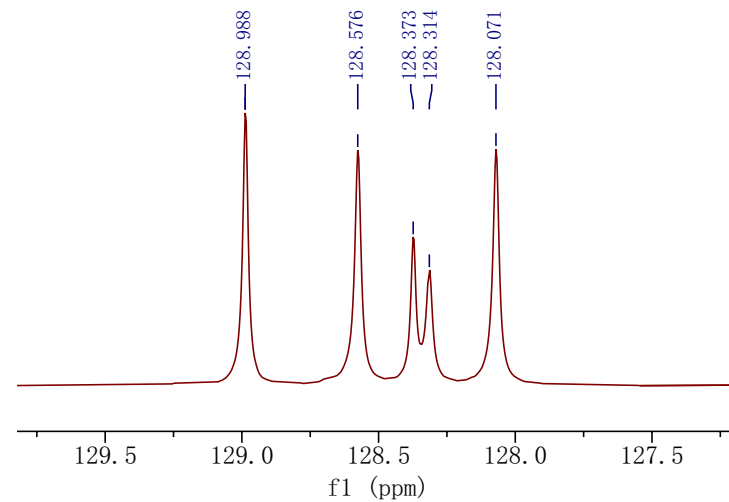

210 200 190 180 170 160 150 140 130 120 110 100 90 80 70 60 50 40 30 20 10 0 -10

f1 (ppm)  
SI-43

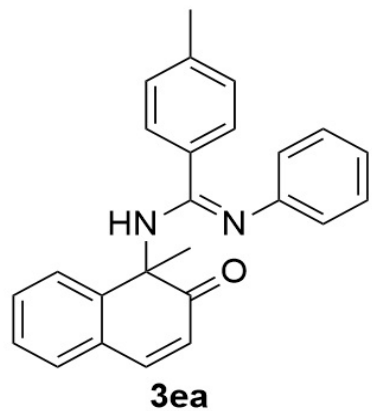

7.764  
7.745  
7.741  
7.414  
7.403  
7.392  
7.383  
7.372  
7.260  
7.239  
7.227  
7.211  
7.192  
7.038  
7.019  
6.963  
6.944  
6.925  
6.796  
6.778  
6.759  
6.346  
6.224

5.291

2.279

1.498

0.004

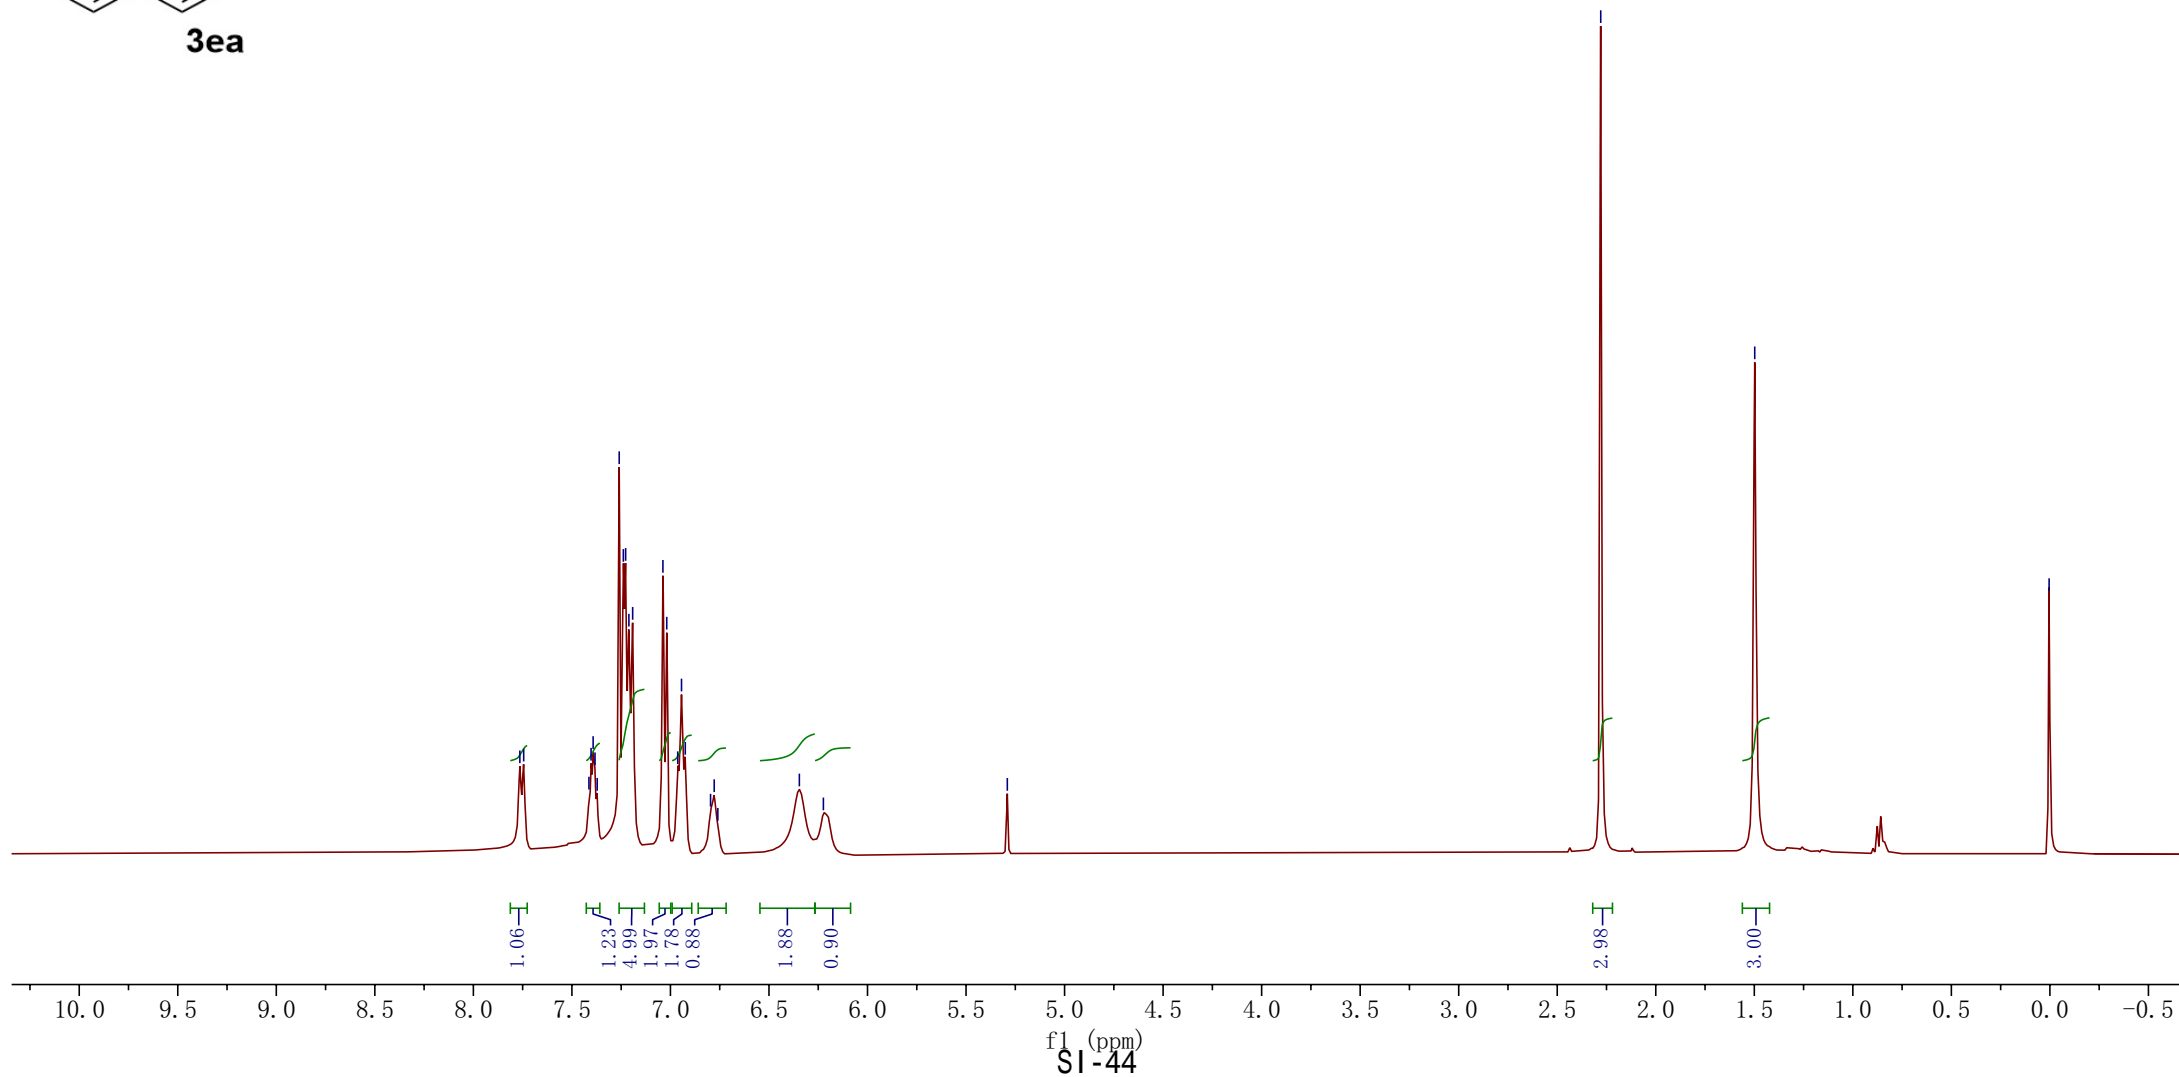

—200.741

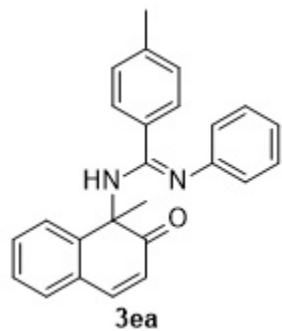

—155.025

—146.284

—141.699

—139.767

—129.776

—129.672

—128.956

—128.799

—128.224

—126.775

—125.220

—124.759

—123.152

—122.227

—77.478

—77.160

—76.842

—63.628

—27.784

—21.481

—0.132

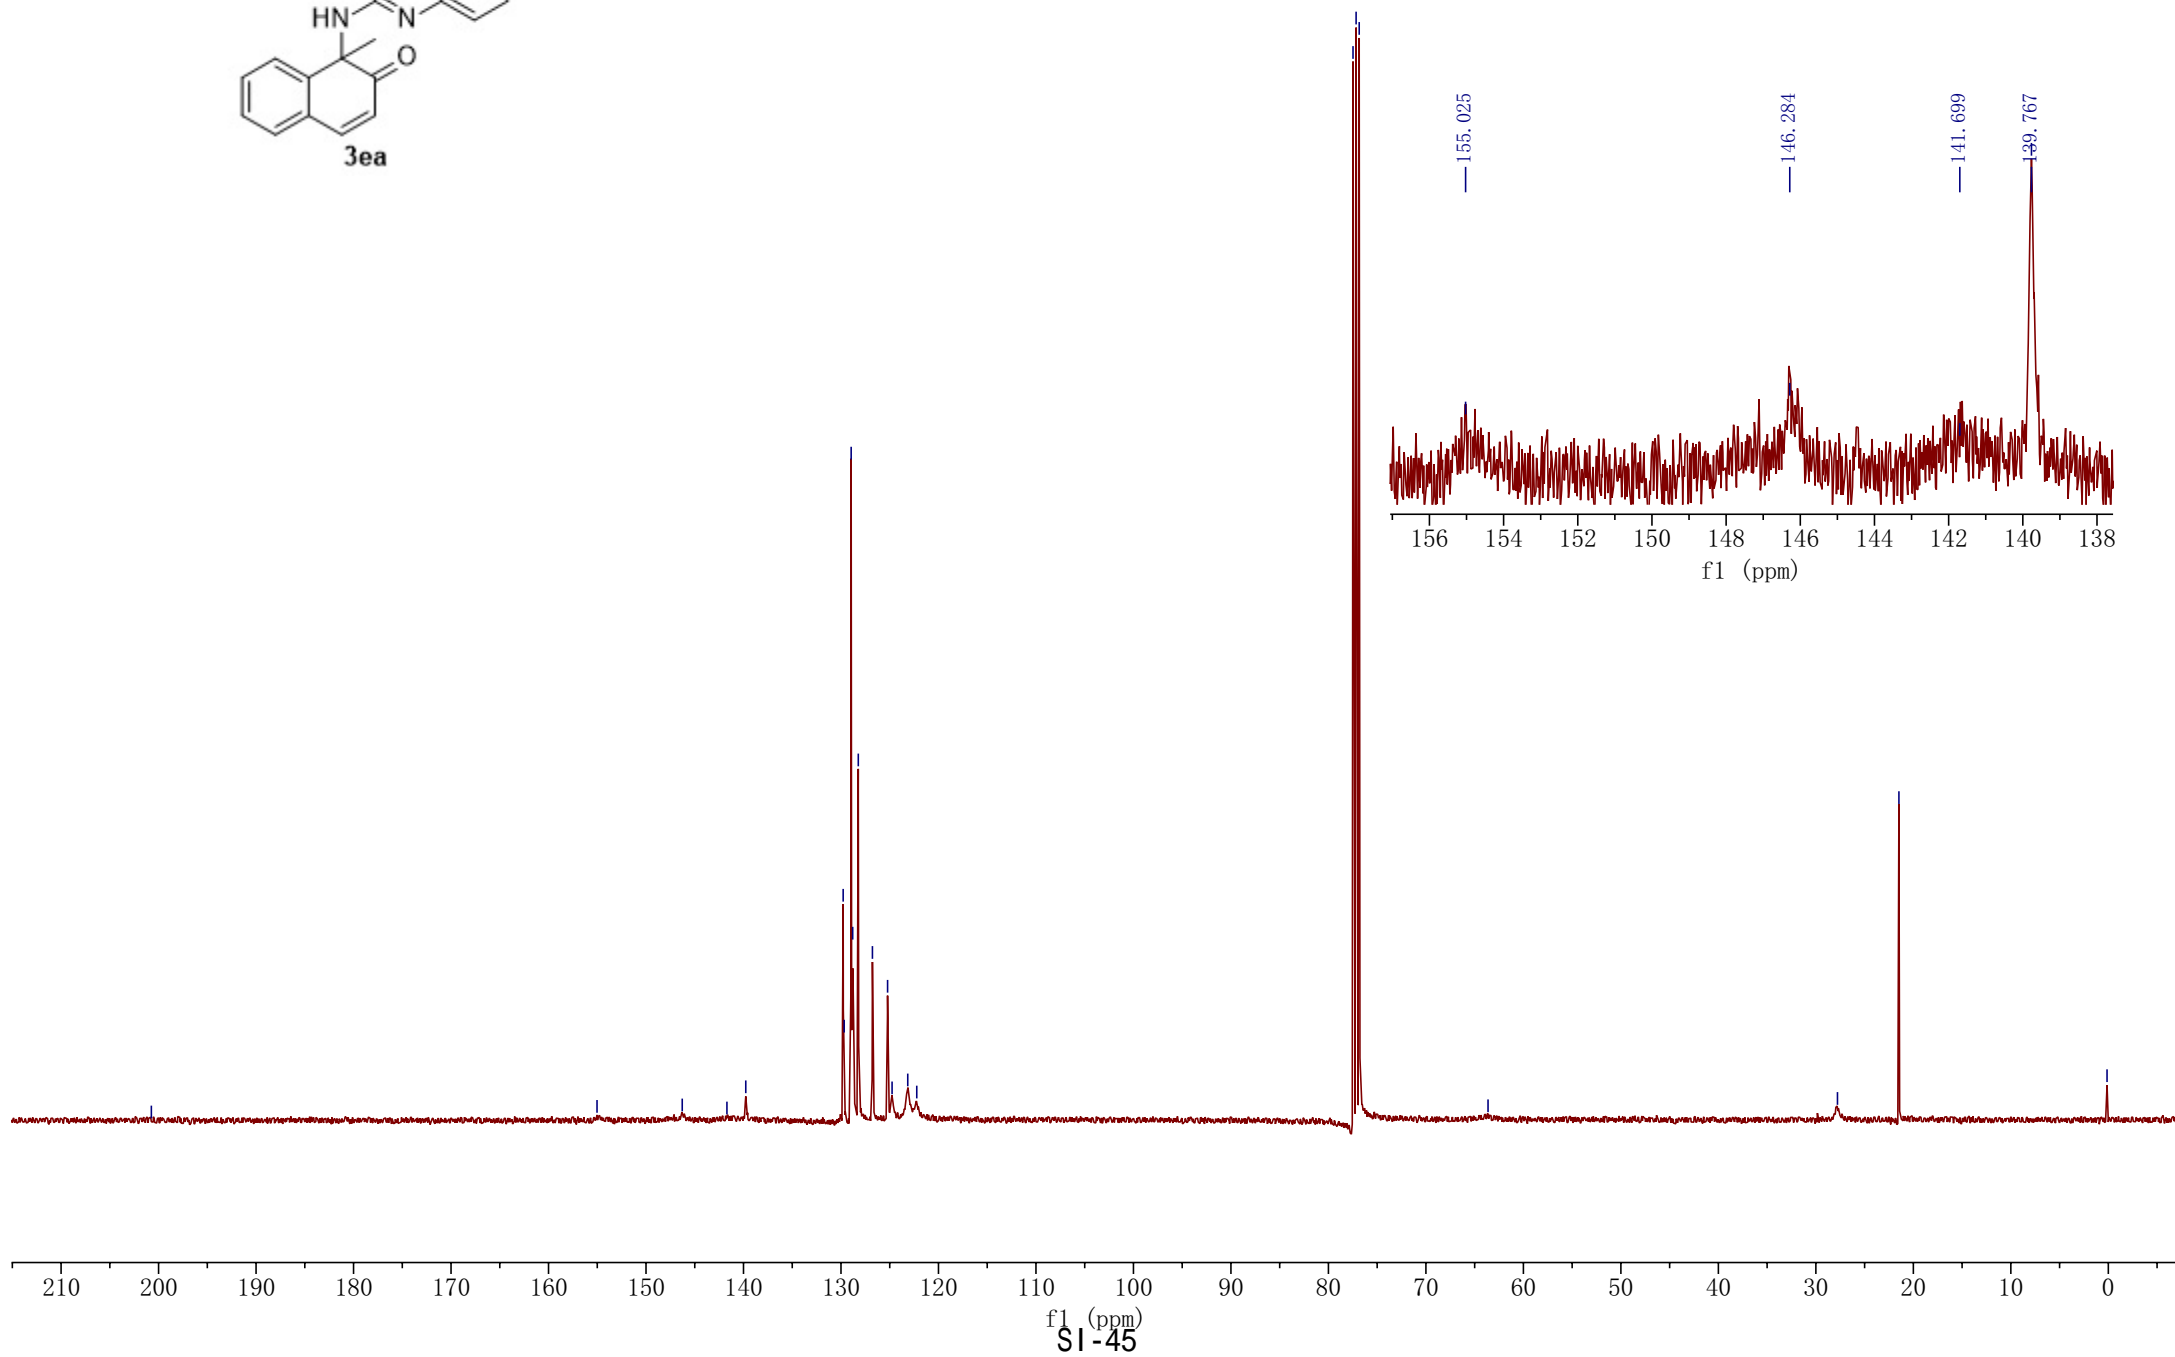

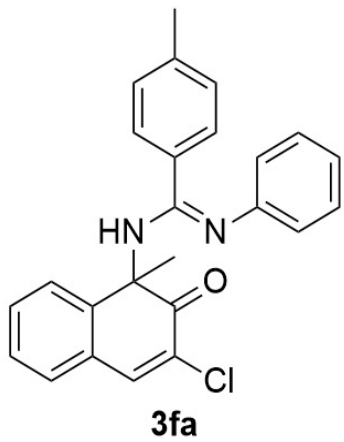

7.735  
7.715  
7.535  
7.430  
7.425  
7.413  
7.408  
7.394  
7.392  
7.260  
7.248  
7.231  
7.212  
7.174  
7.154  
7.044  
7.024  
6.947  
6.928  
6.909  
6.758  
6.289  
6.269

5.580

2.285

1.518

0.004

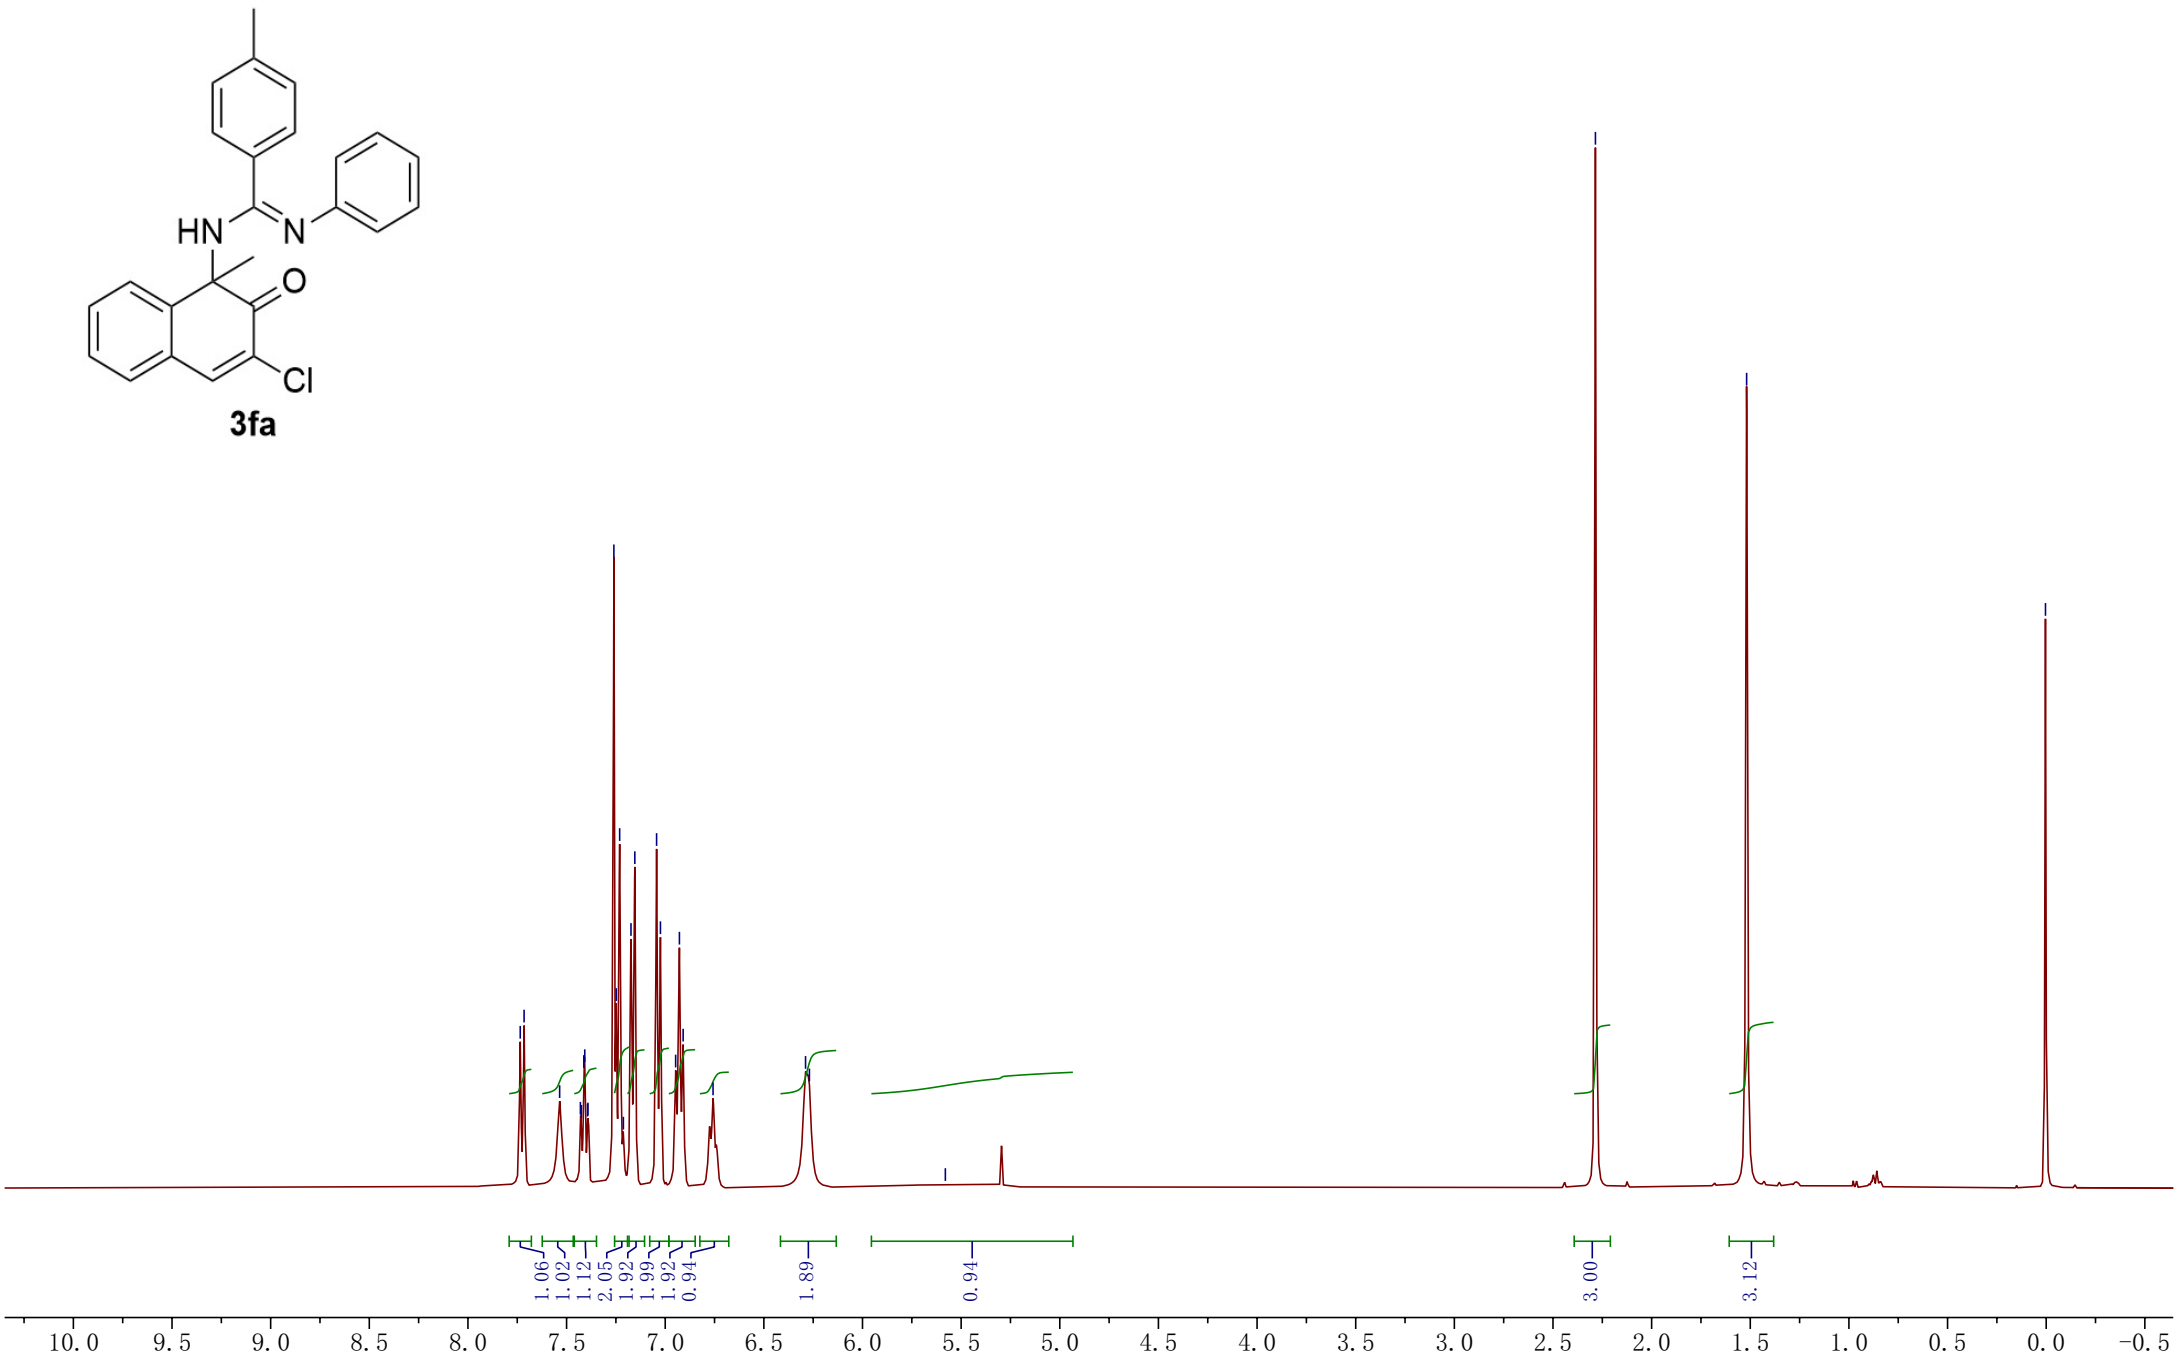

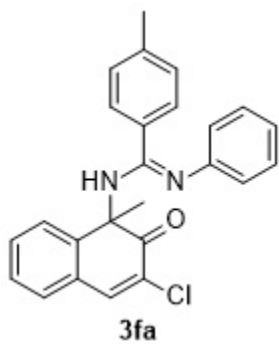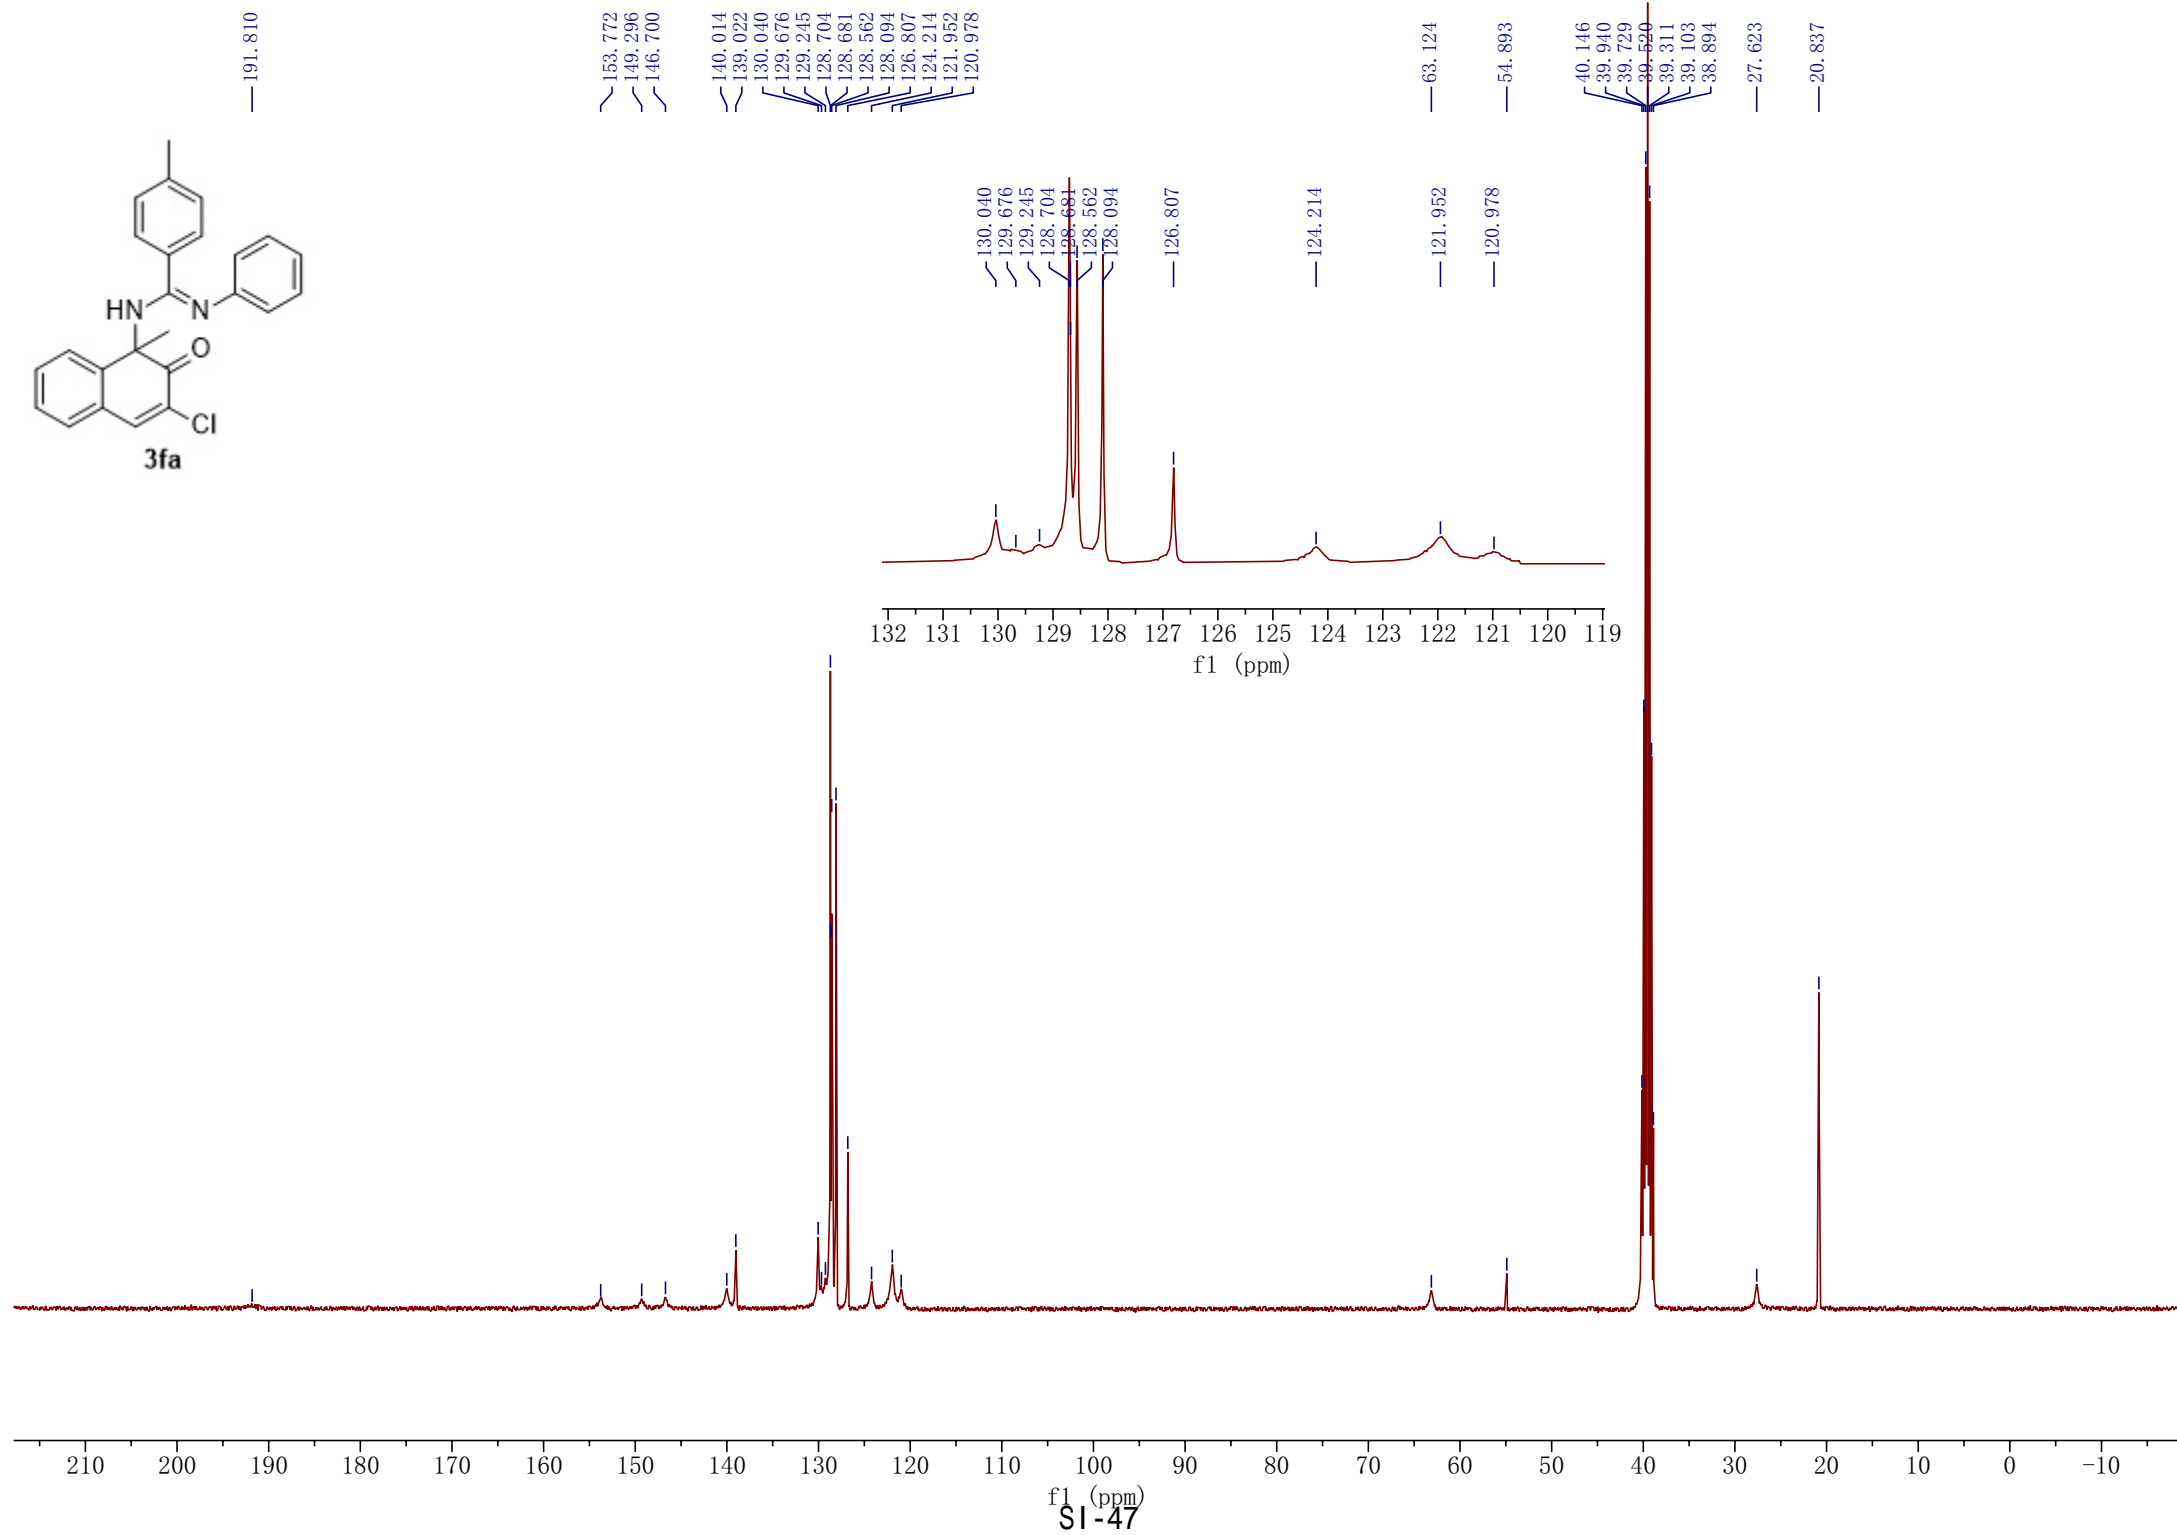

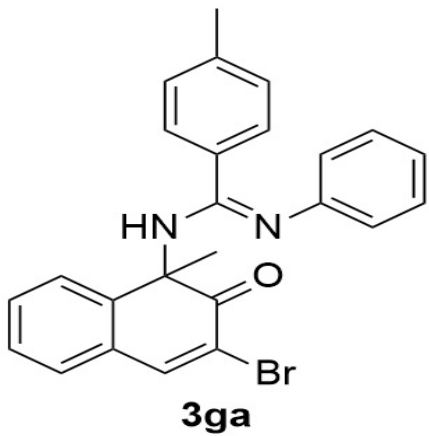

7.818  
 7.738  
 7.718  
 7.448  
 7.442  
 7.433  
 7.427  
 7.422  
 7.414  
 7.407  
 7.260  
 7.243  
 7.233  
 7.228  
 7.222  
 7.170  
 7.150  
 7.046  
 7.026  
 6.937  
 6.918  
 6.899  
 6.739  
 6.265  
 6.246

5.635

2.286

1.506

0.005

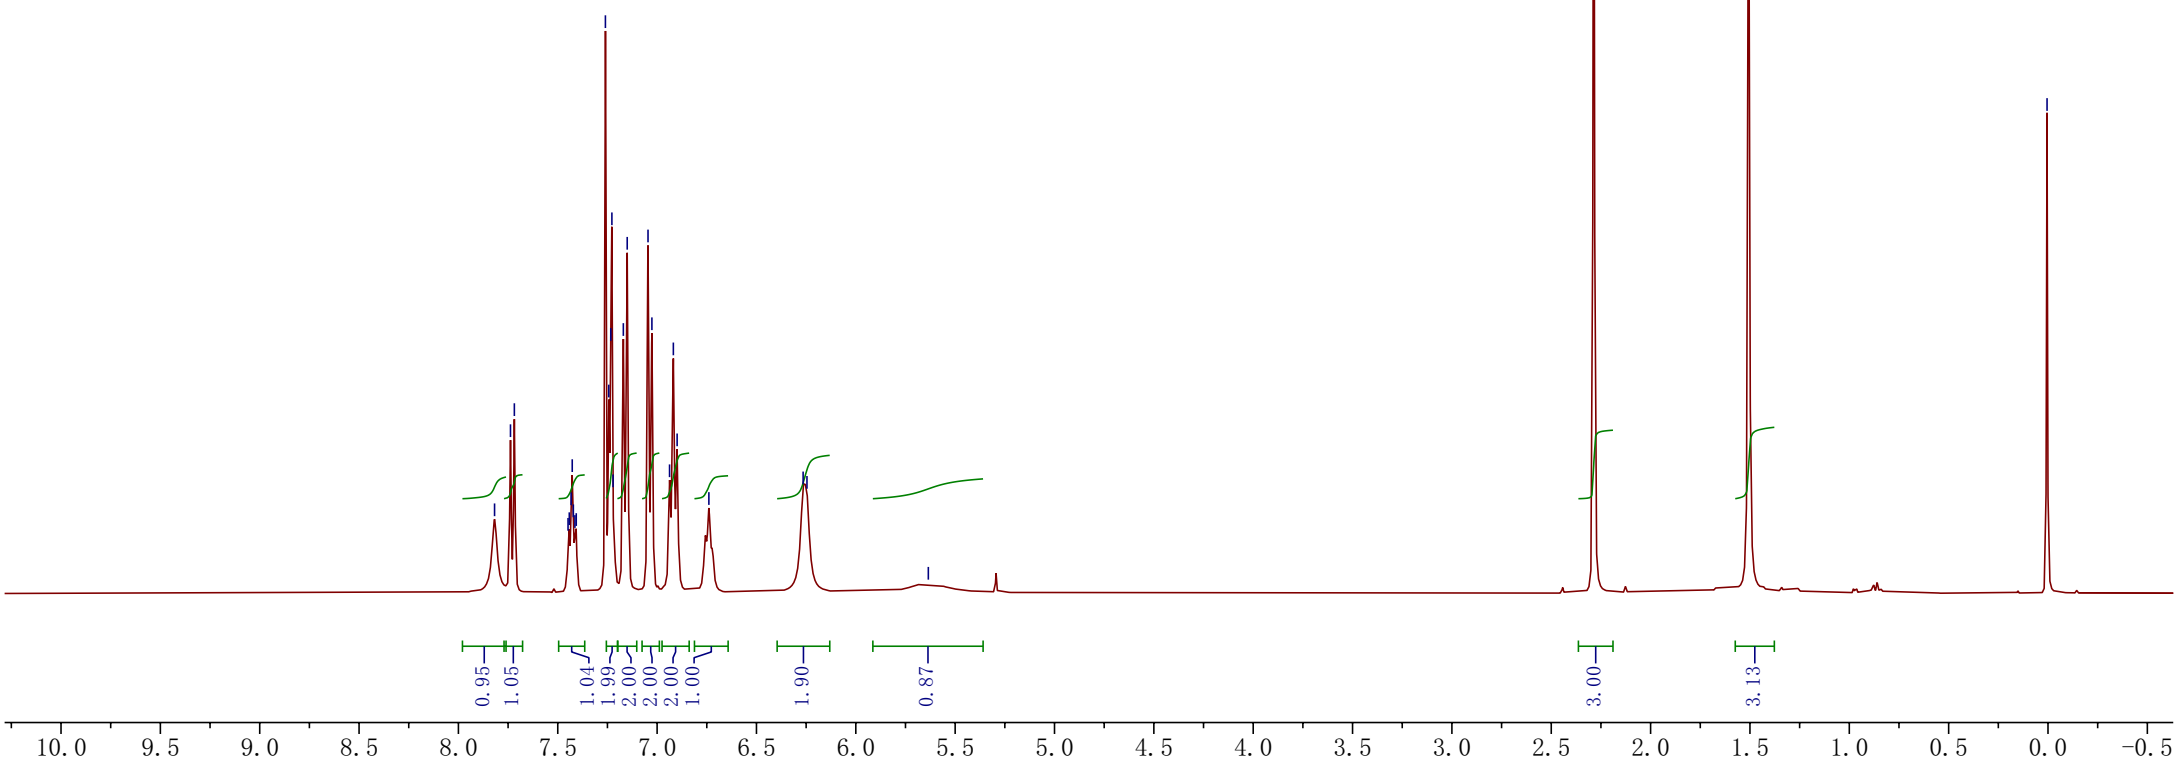



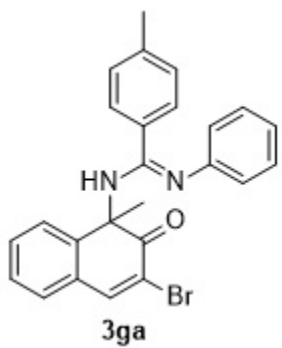

193.691

153.787

148.707

146.237

144.712

139.820

130.204

130.078

129.601

129.031

128.886

128.640

128.196

127.084

124.443

122.492

122.224

121.913

77.478

77.160

76.842

63.495

28.511

21.466

0.130

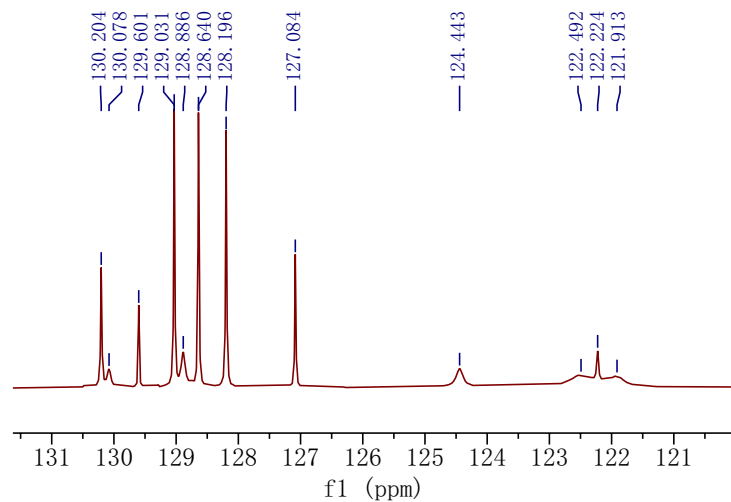

210 200 190 180 170 160 150 140 130 120 110 100 90 80 70 60 50 40 30 20 10 0 -10

f1 (ppm)  
SI-49

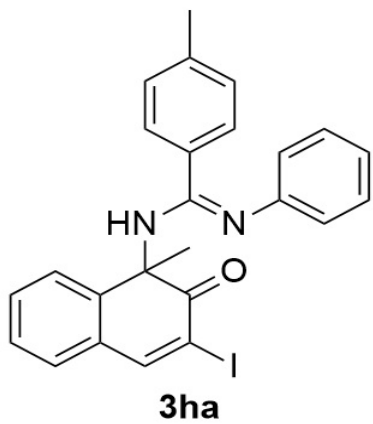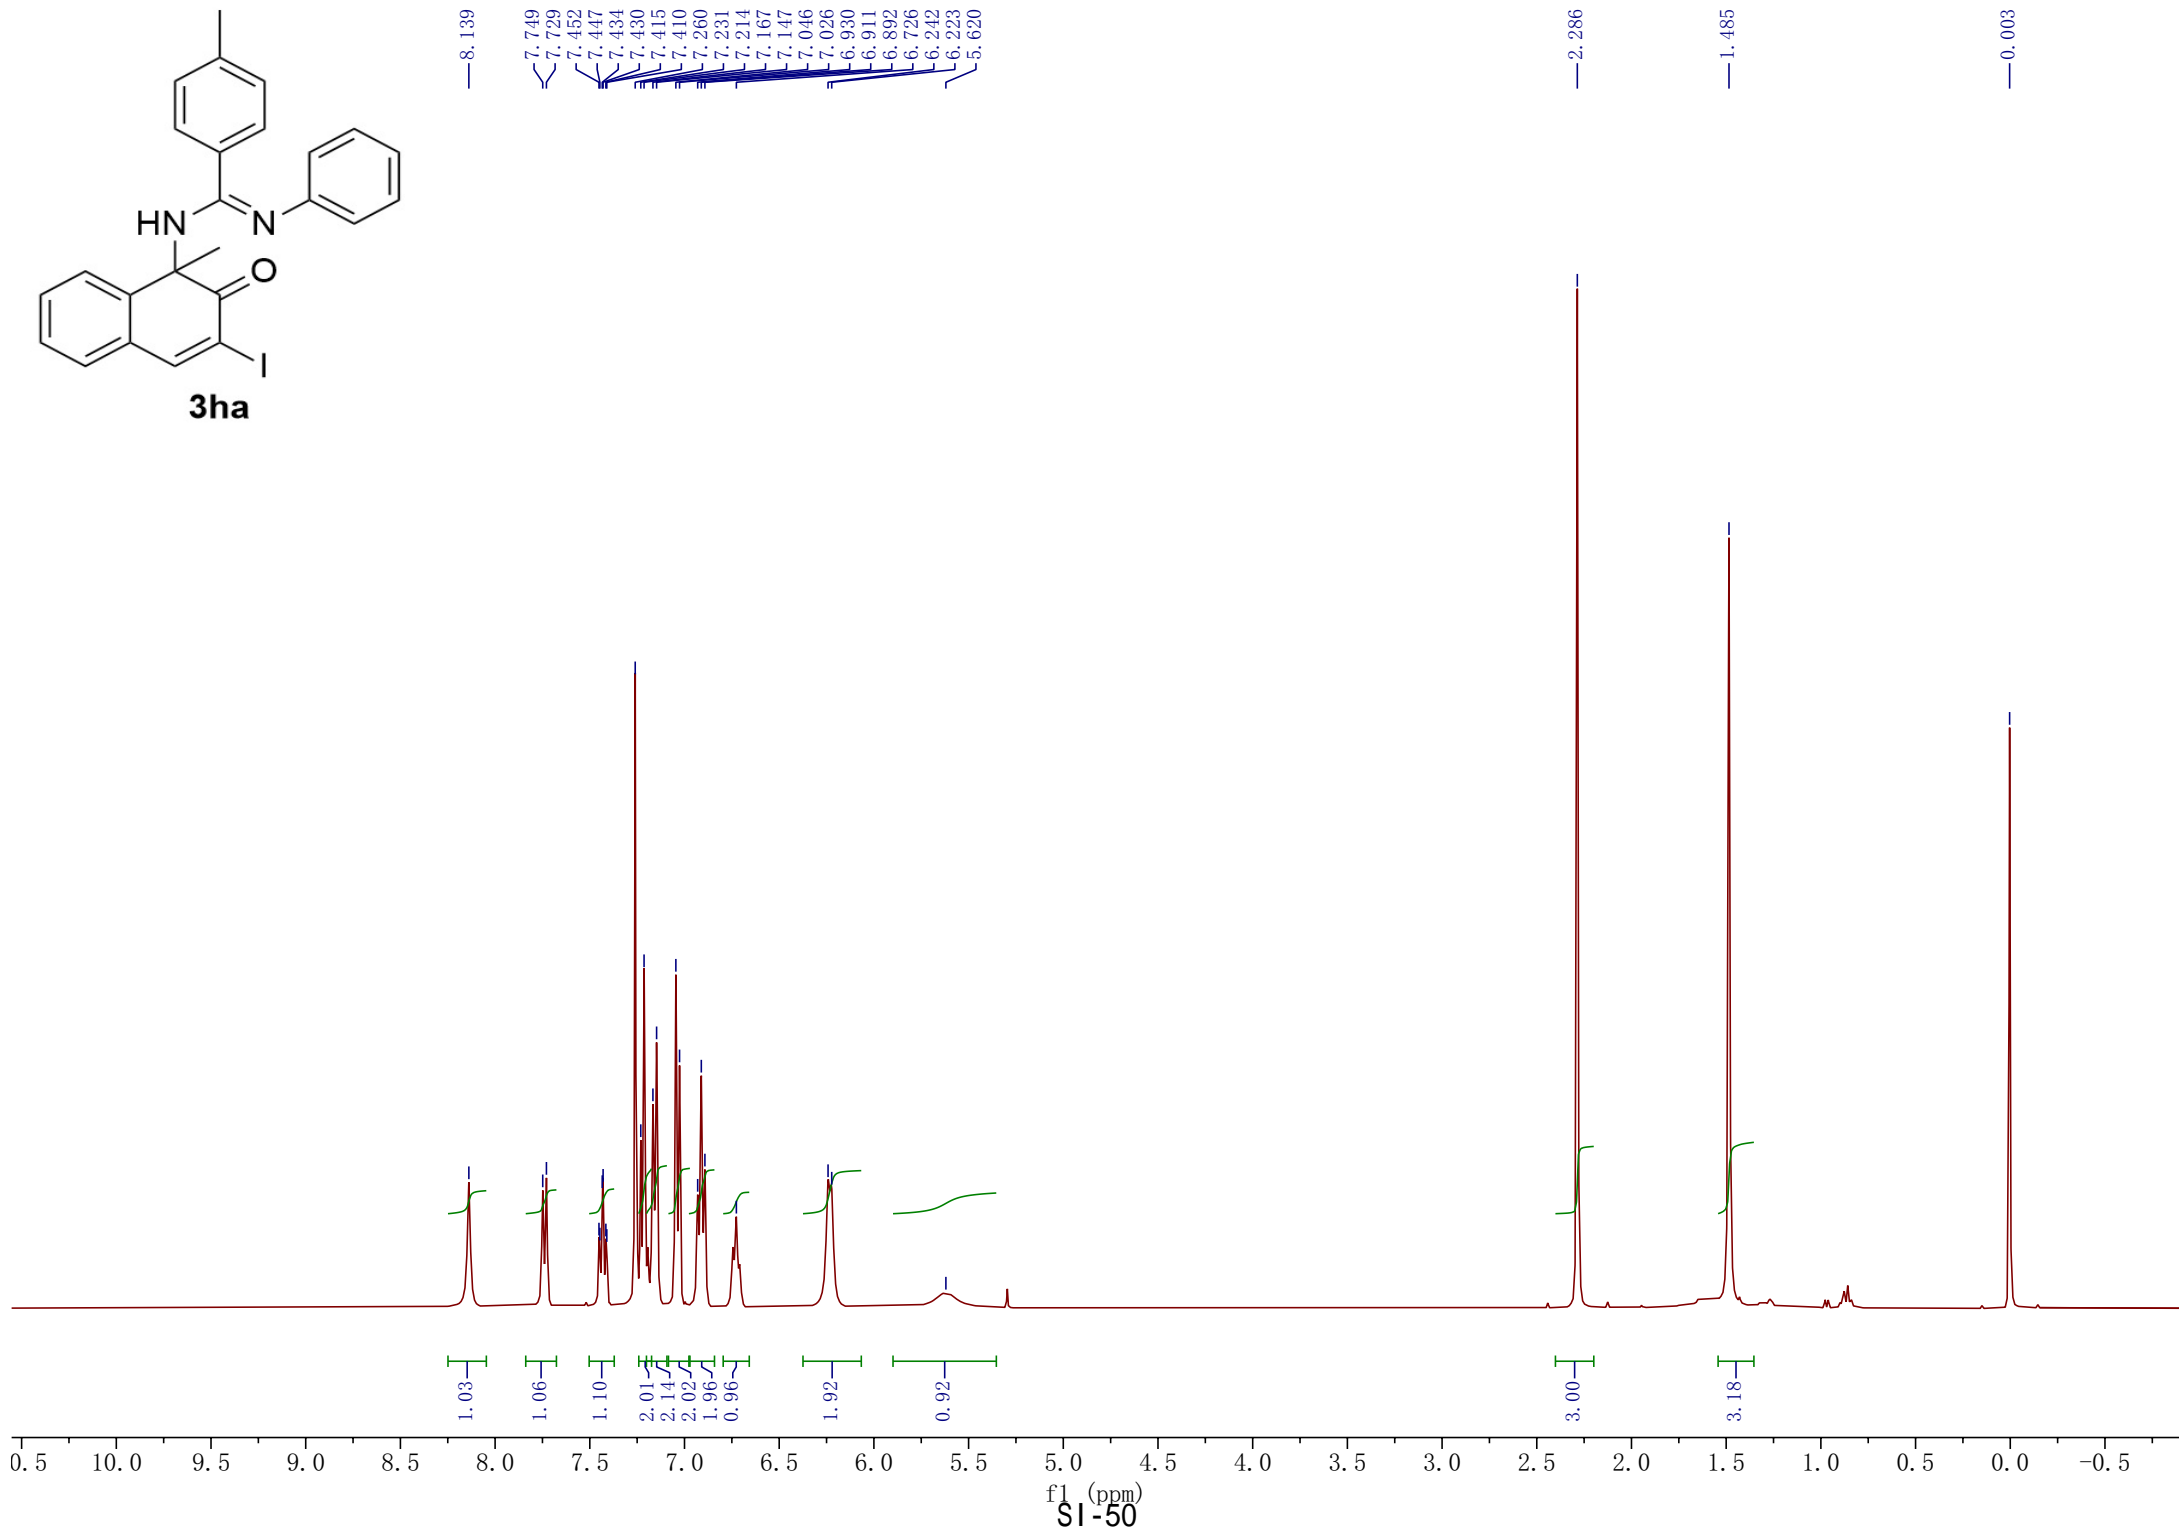

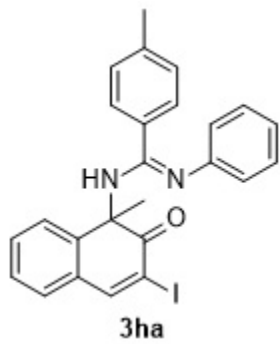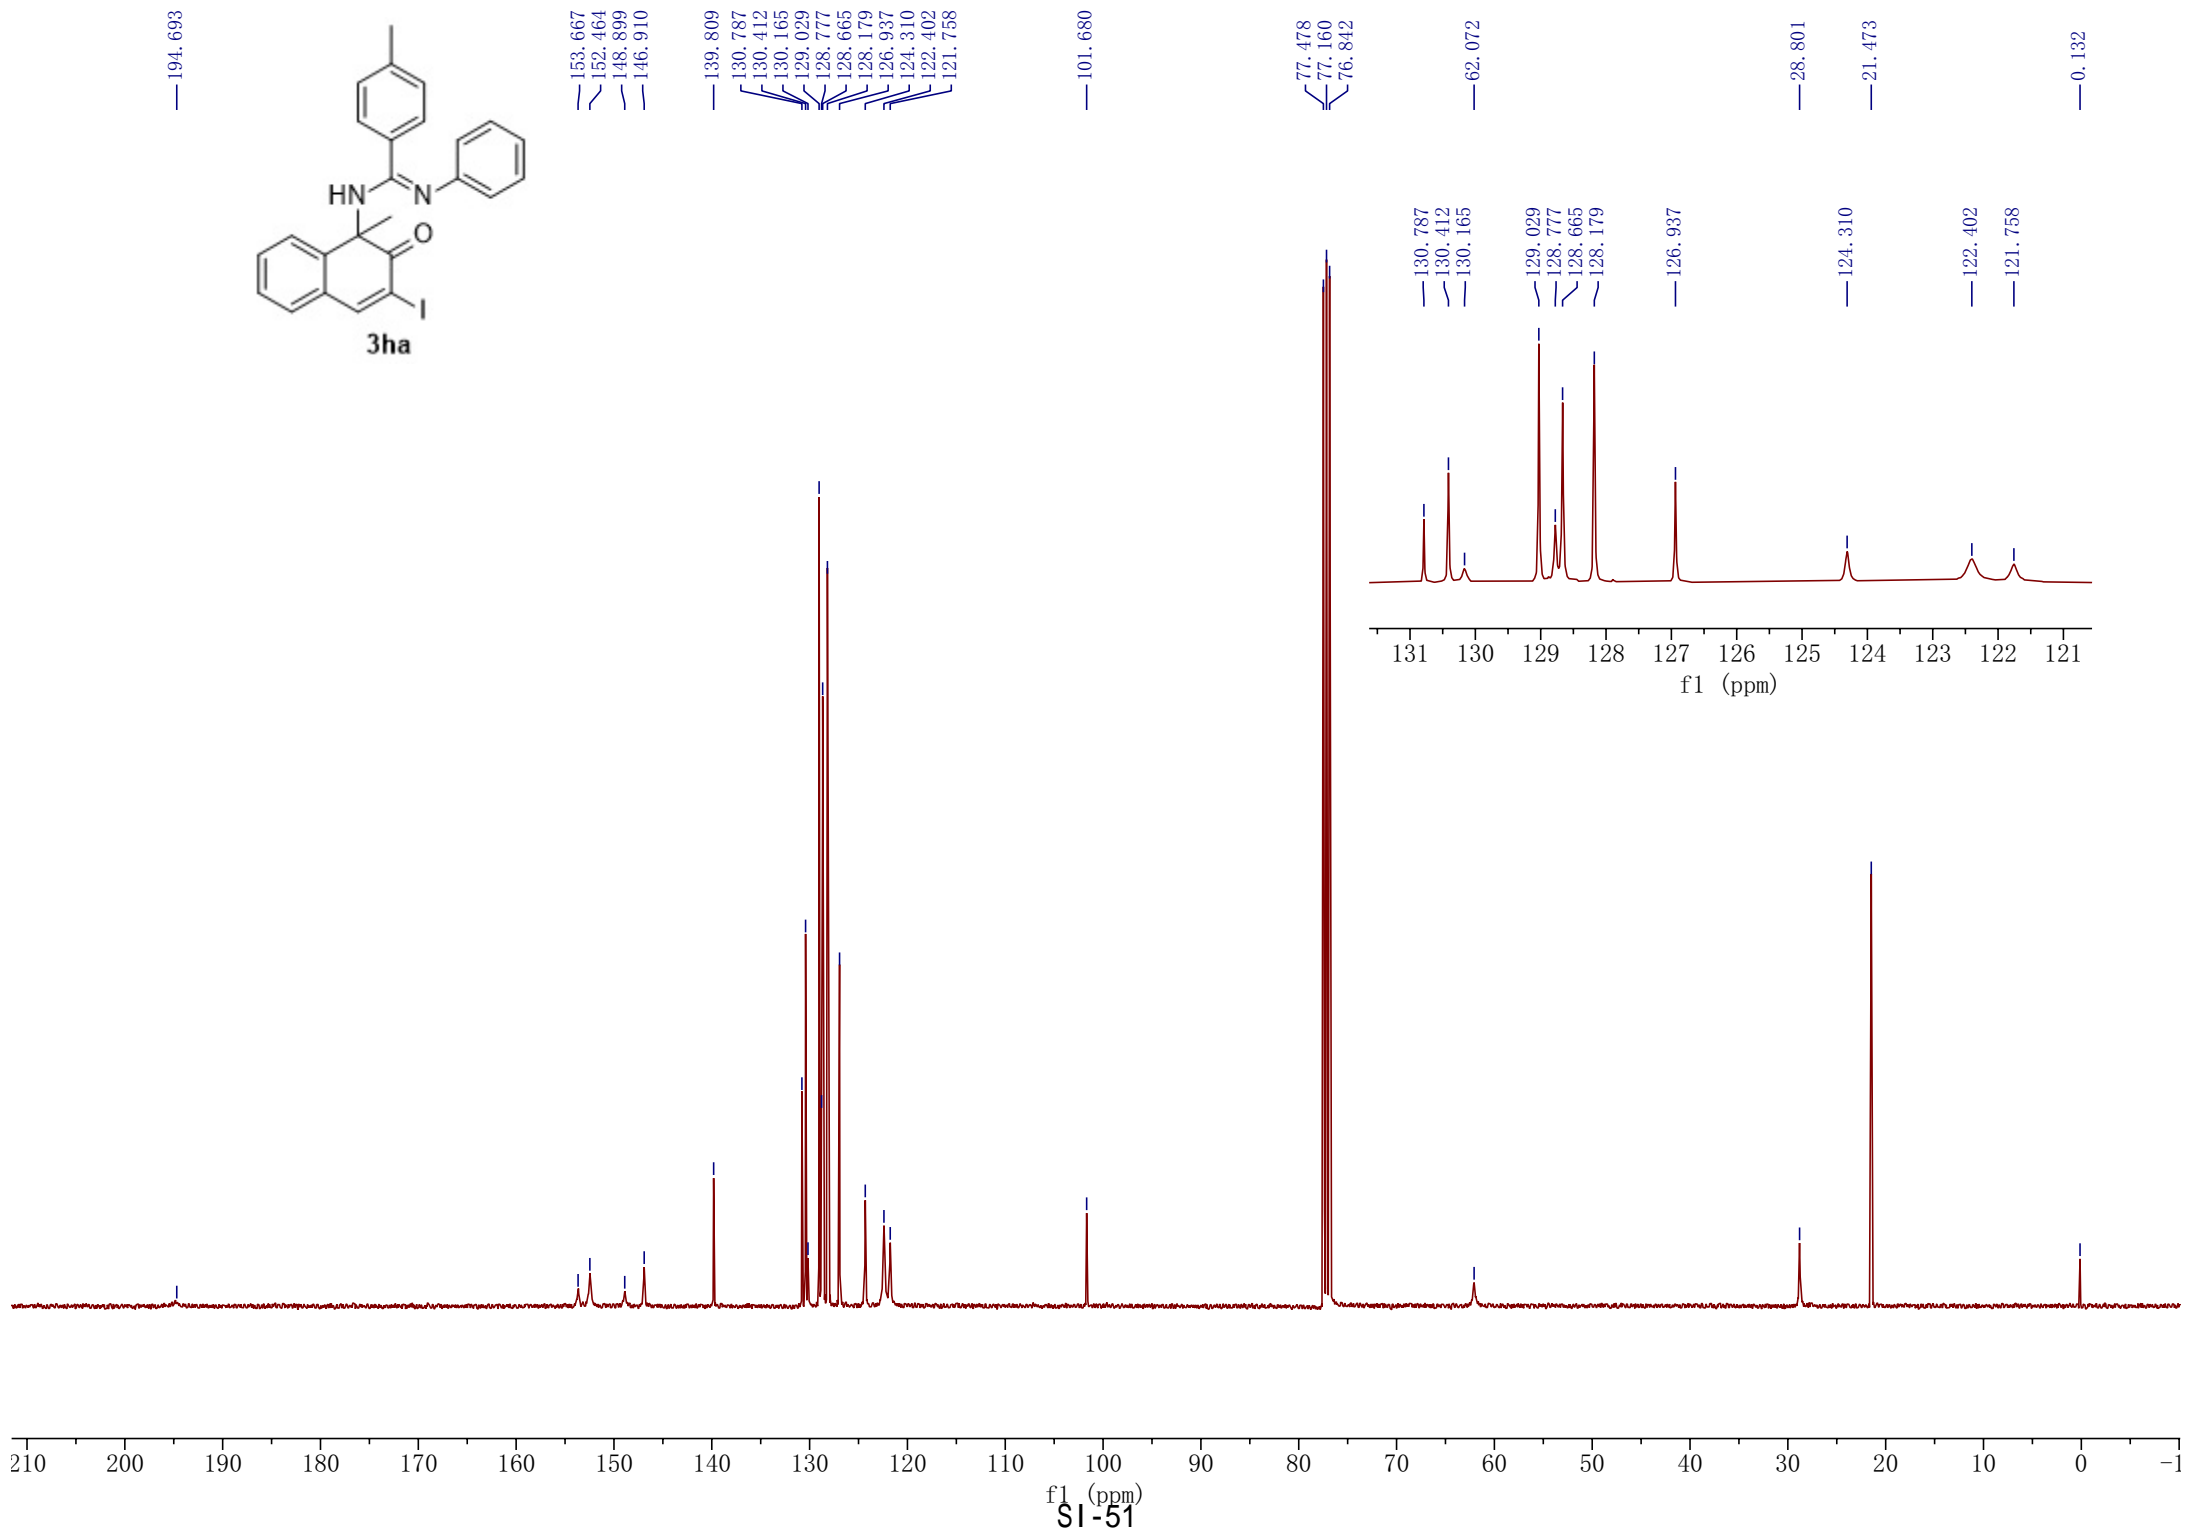

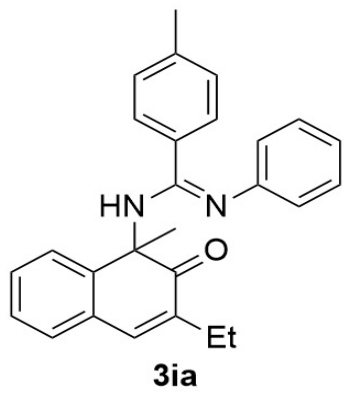

7.689  
7.670  
7.357  
7.341  
7.322  
7.259  
7.239  
7.233  
7.216  
7.188  
7.171  
7.045  
7.025  
6.899  
6.880  
6.861  
6.699  
6.681  
6.662  
6.184  
6.164

5.525

2.553  
2.534  
2.516  
2.497  
2.285

1.439  
1.220  
1.201  
1.183

0.011

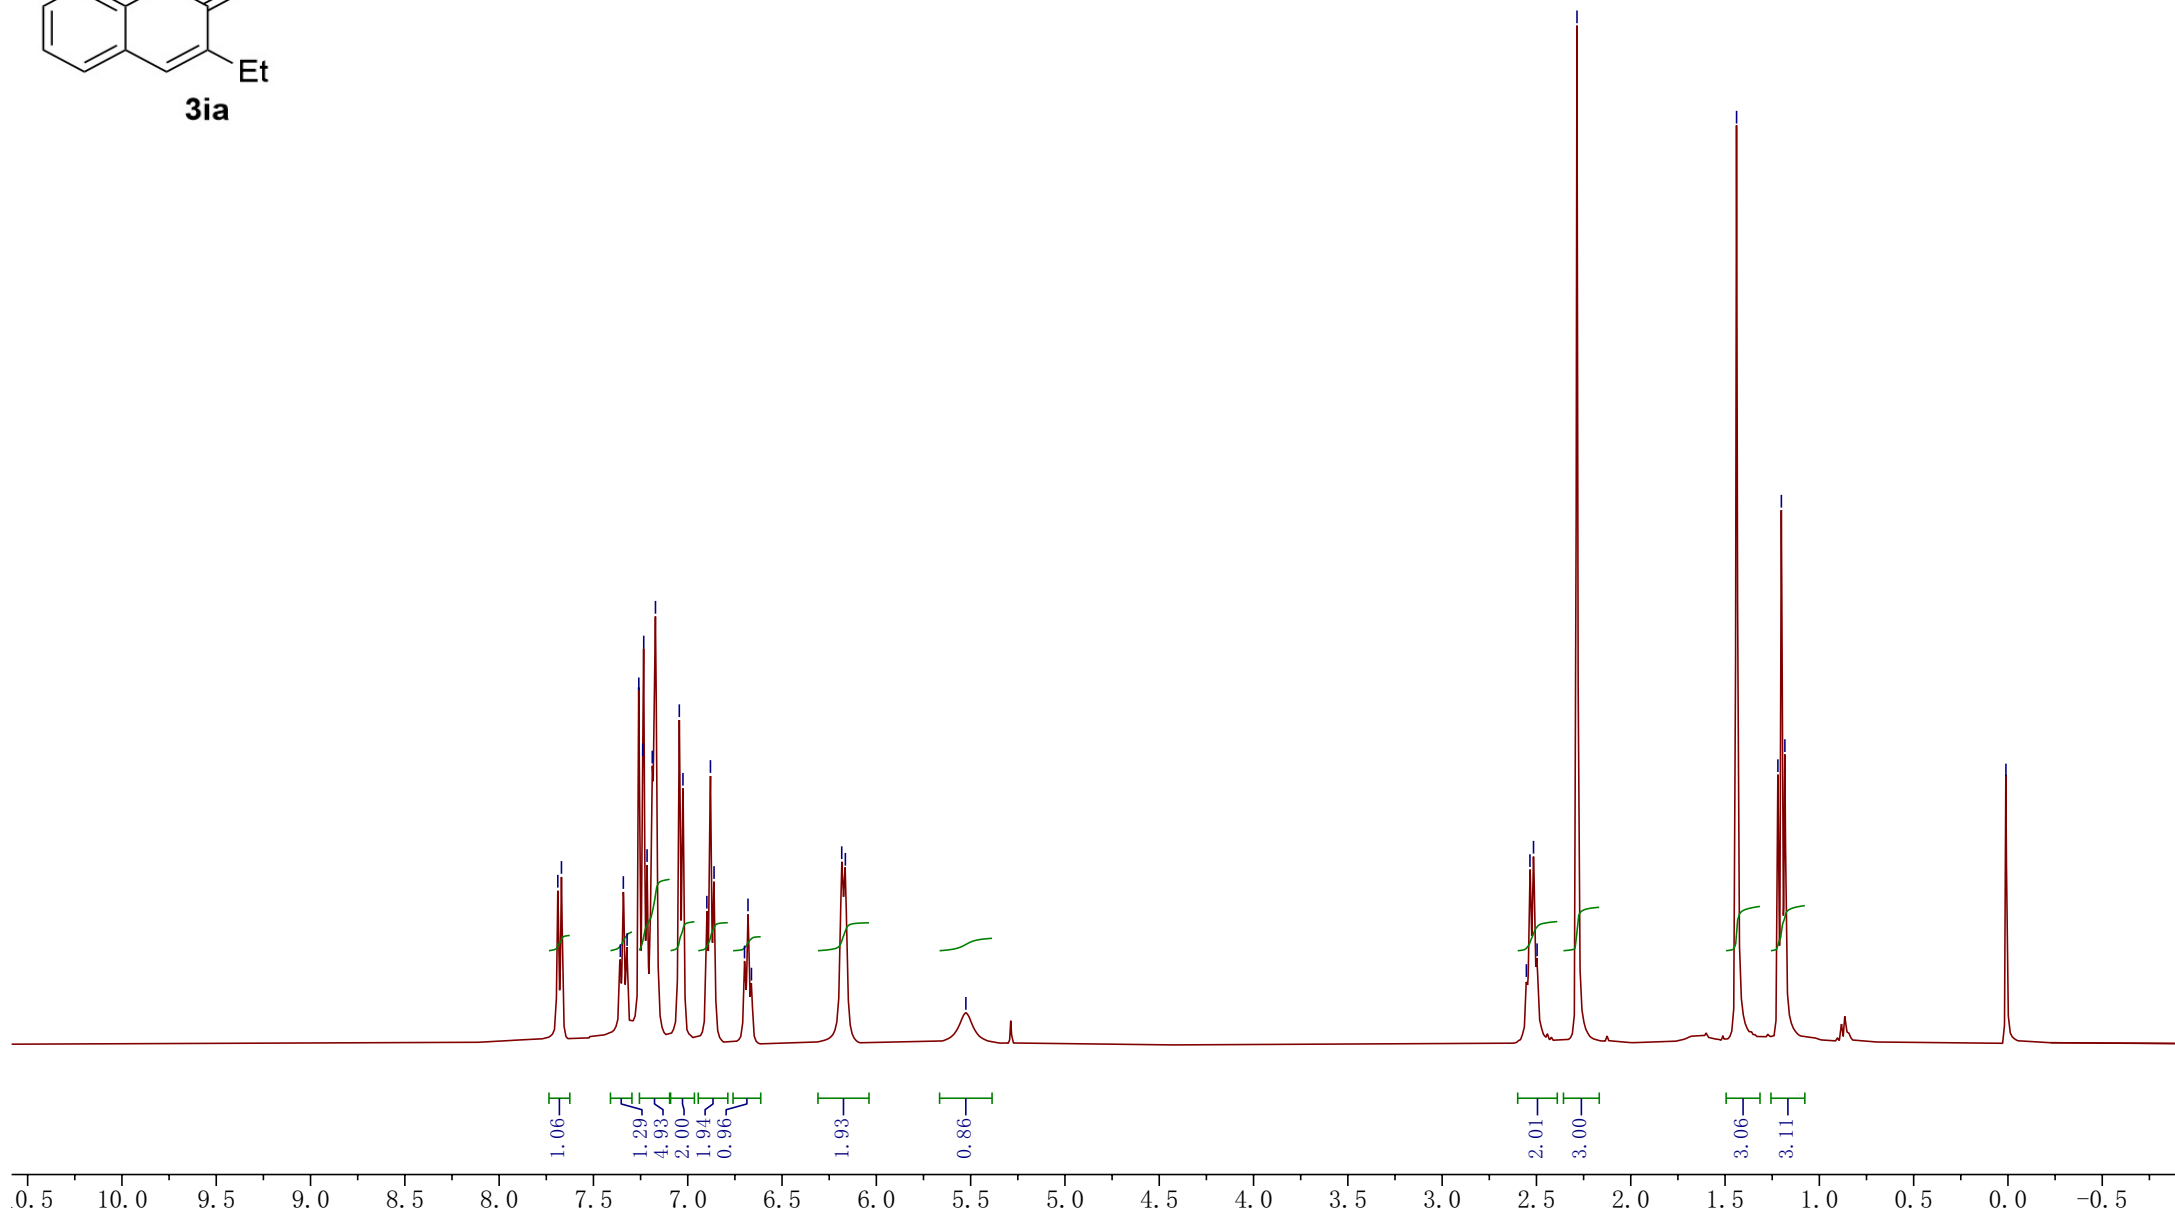

— 200.220

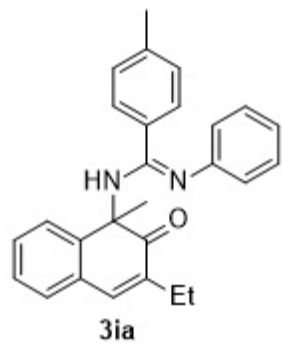

153.576  
149.863  
146.082  
139.416  
138.625  
137.853  
130.934  
130.154  
128.934  
128.713  
128.653  
128.627  
128.045  
126.579  
123.756  
122.205  
121.224

77.477  
77.161  
76.843

— 61.921

— 29.028

22.810  
21.439

— 13.140

— 0.126

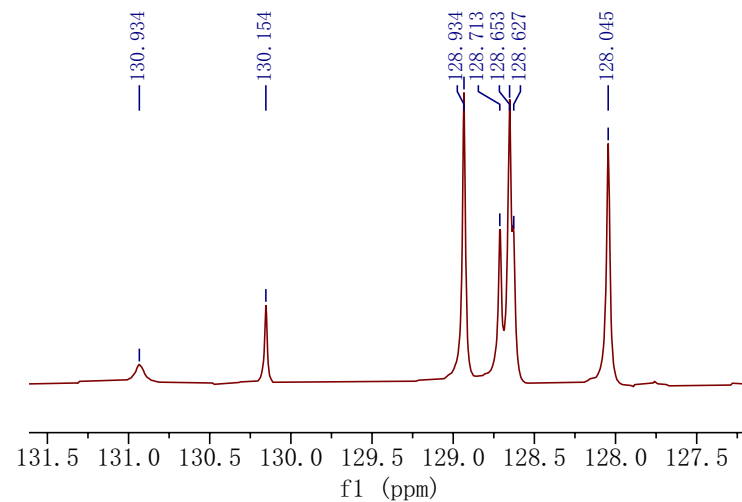

210 200 190 180 170 160 150 140 130 120 110 100 90 80 70 60 50 40 30 20 10 0 -10

f1 (ppm)  
SI-53

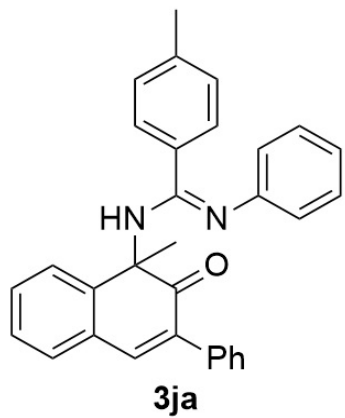

7.762  
7.743  
7.618  
7.600  
7.508  
7.457  
7.437  
7.418  
7.397  
7.386  
7.367  
7.358  
7.340  
7.281  
7.261  
7.258  
7.244  
7.204  
7.184  
7.052  
7.033  
6.895  
6.876  
6.857  
6.703  
6.685  
6.666  
6.211  
6.192

5.636

2.291

1.552

0.012

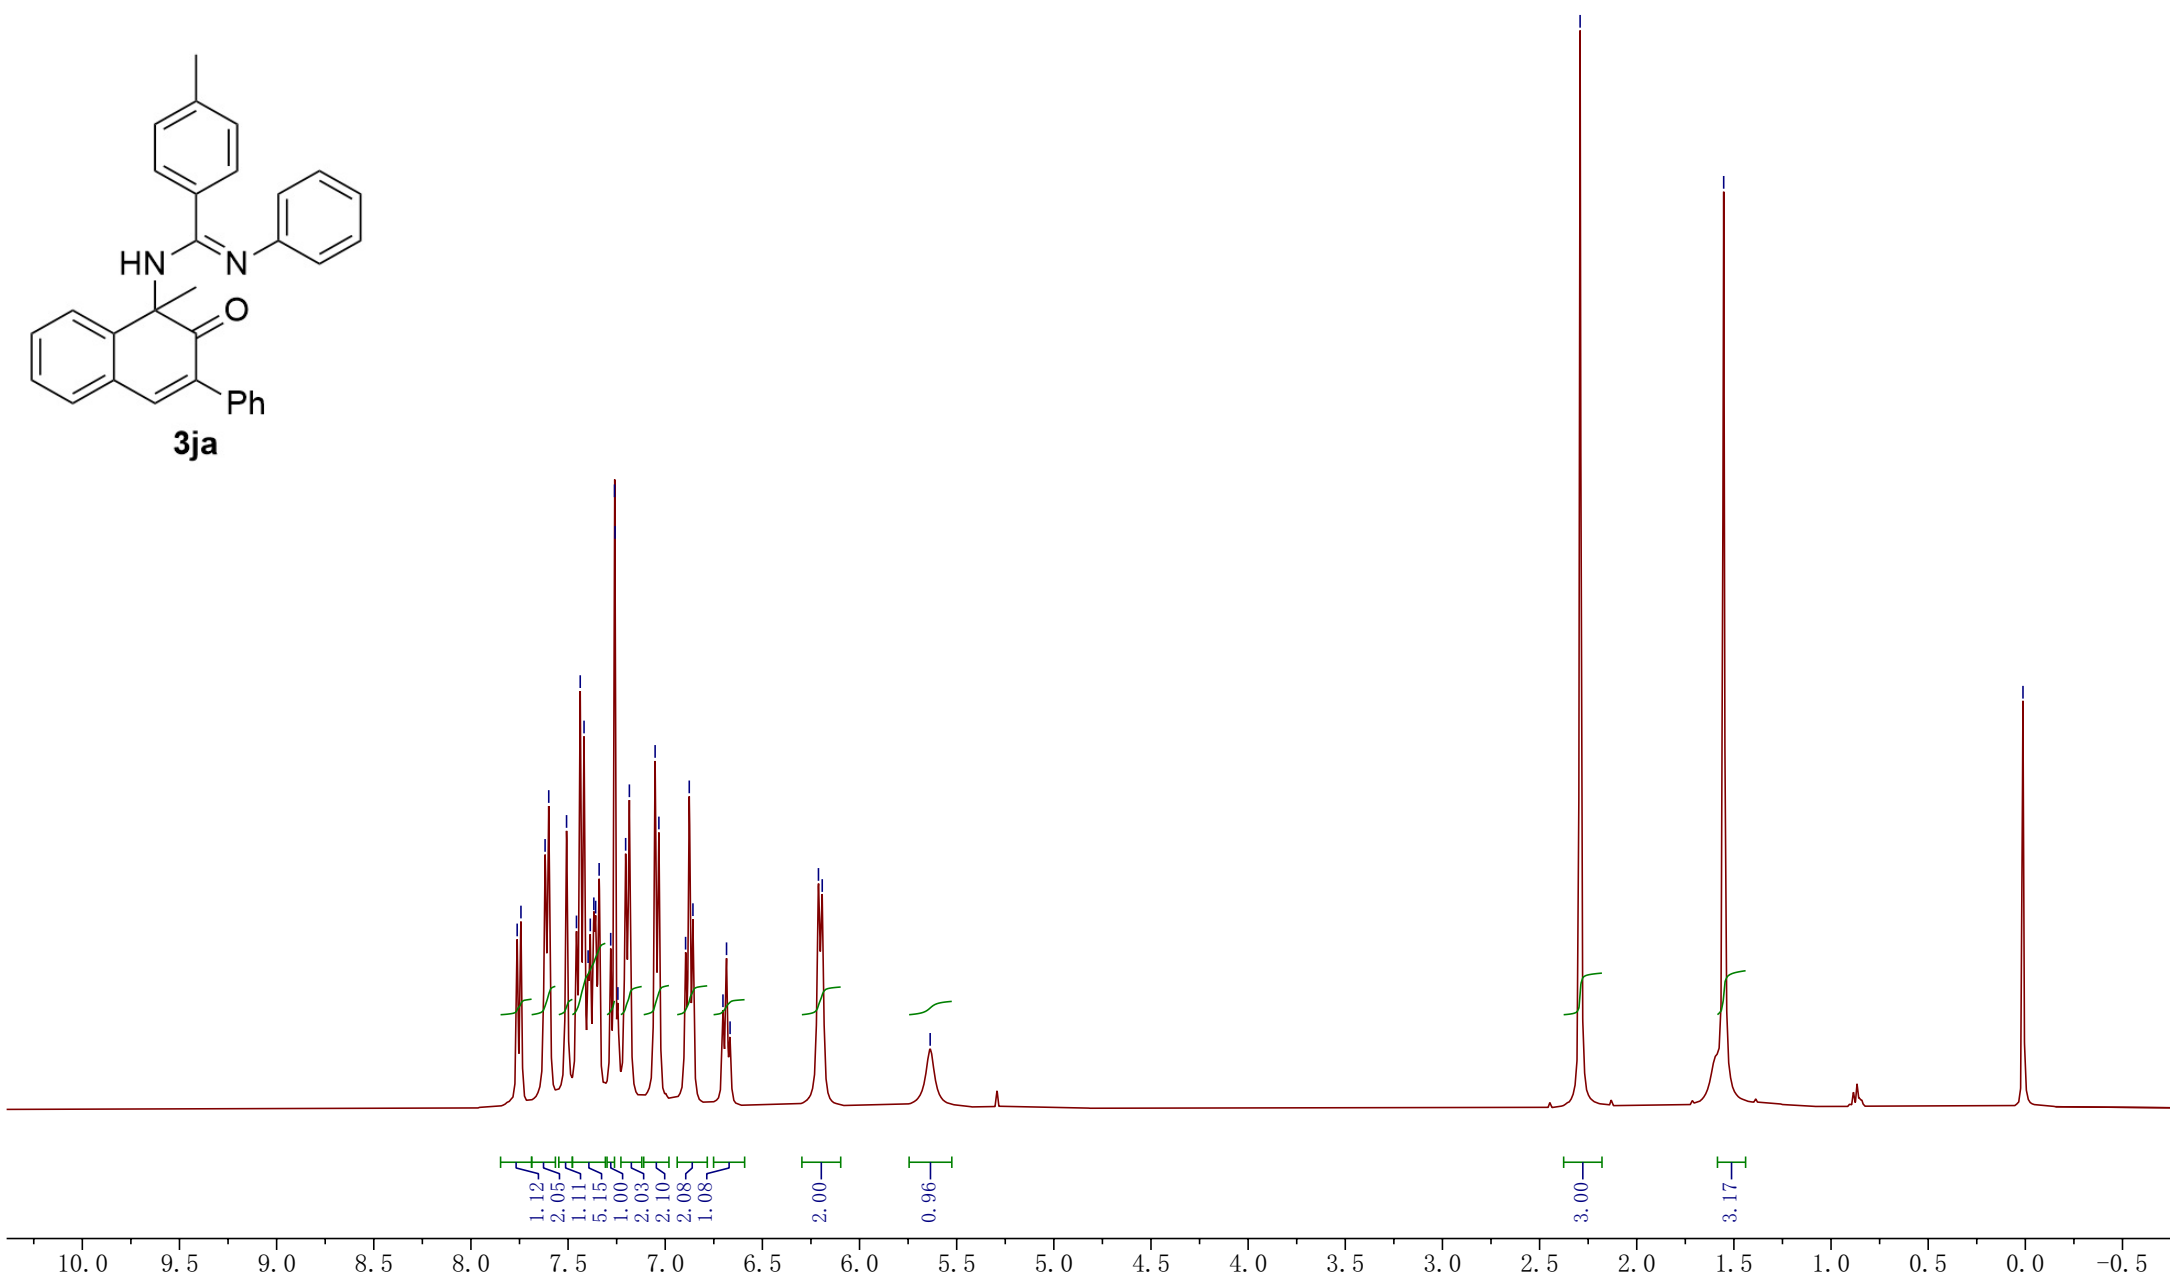

f1 (ppm)

SI-54

198.889

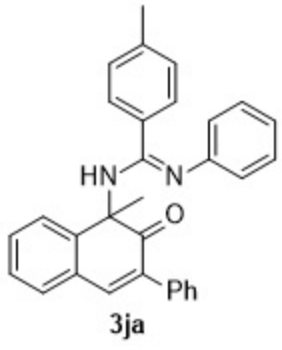

153.714  
149.707  
146.662  
141.566  
139.549  
136.601  
135.522  
130.757  
129.940  
129.618  
129.597  
129.037  
128.975  
128.696  
128.224  
128.095  
127.901  
126.790  
123.943  
122.244  
121.335

77.478  
77.160  
76.842

62.541

28.953

21.458

0.131

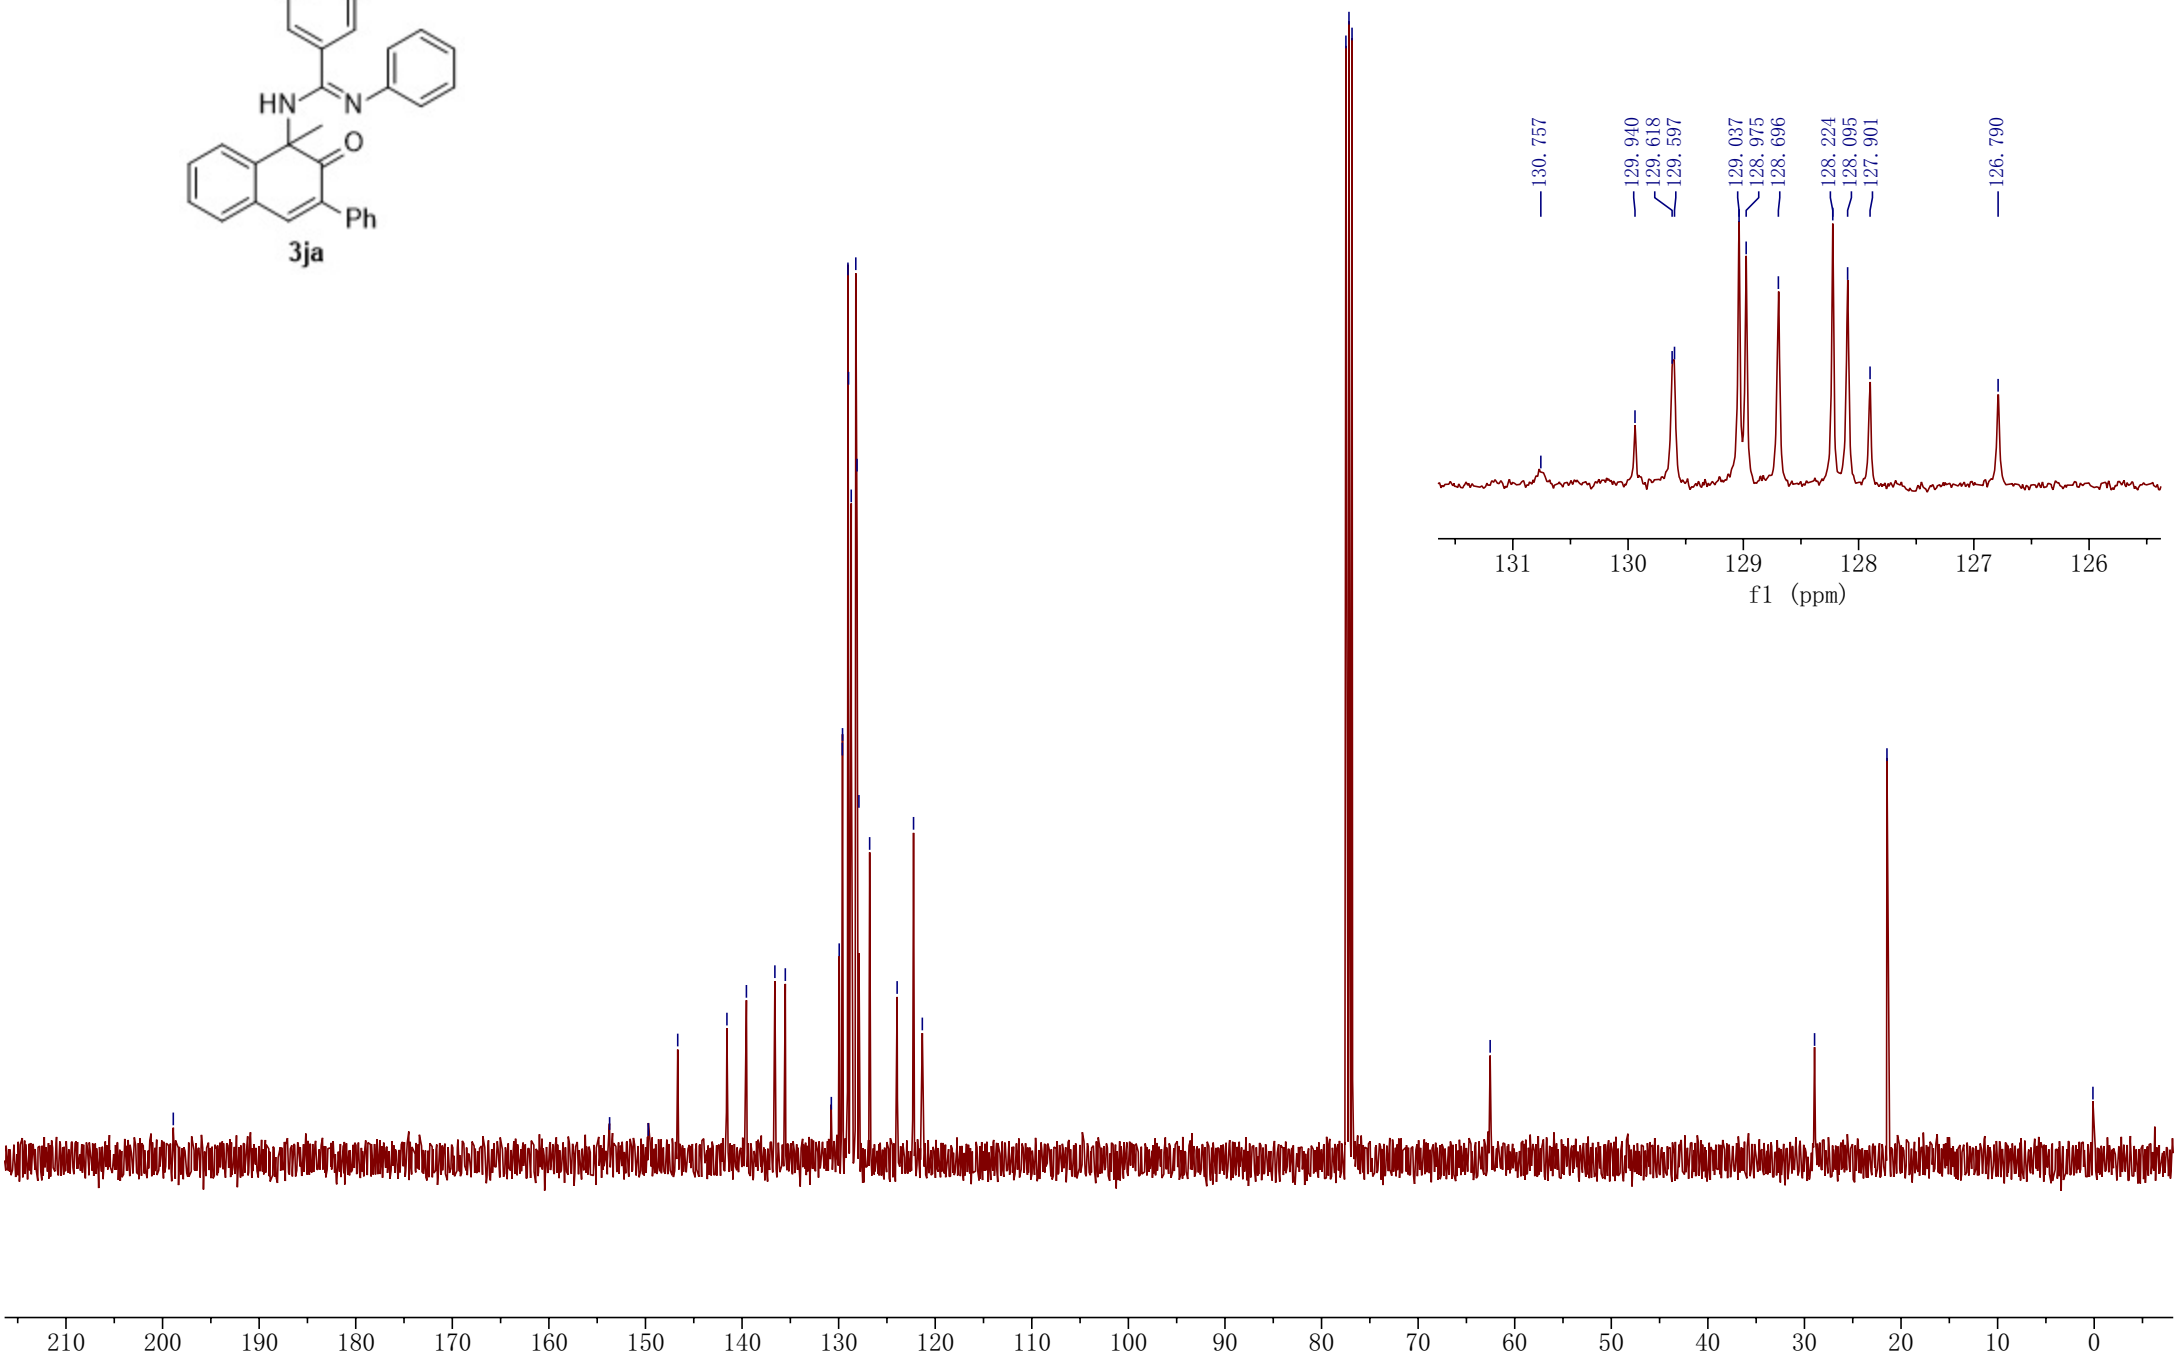

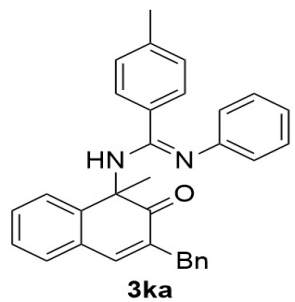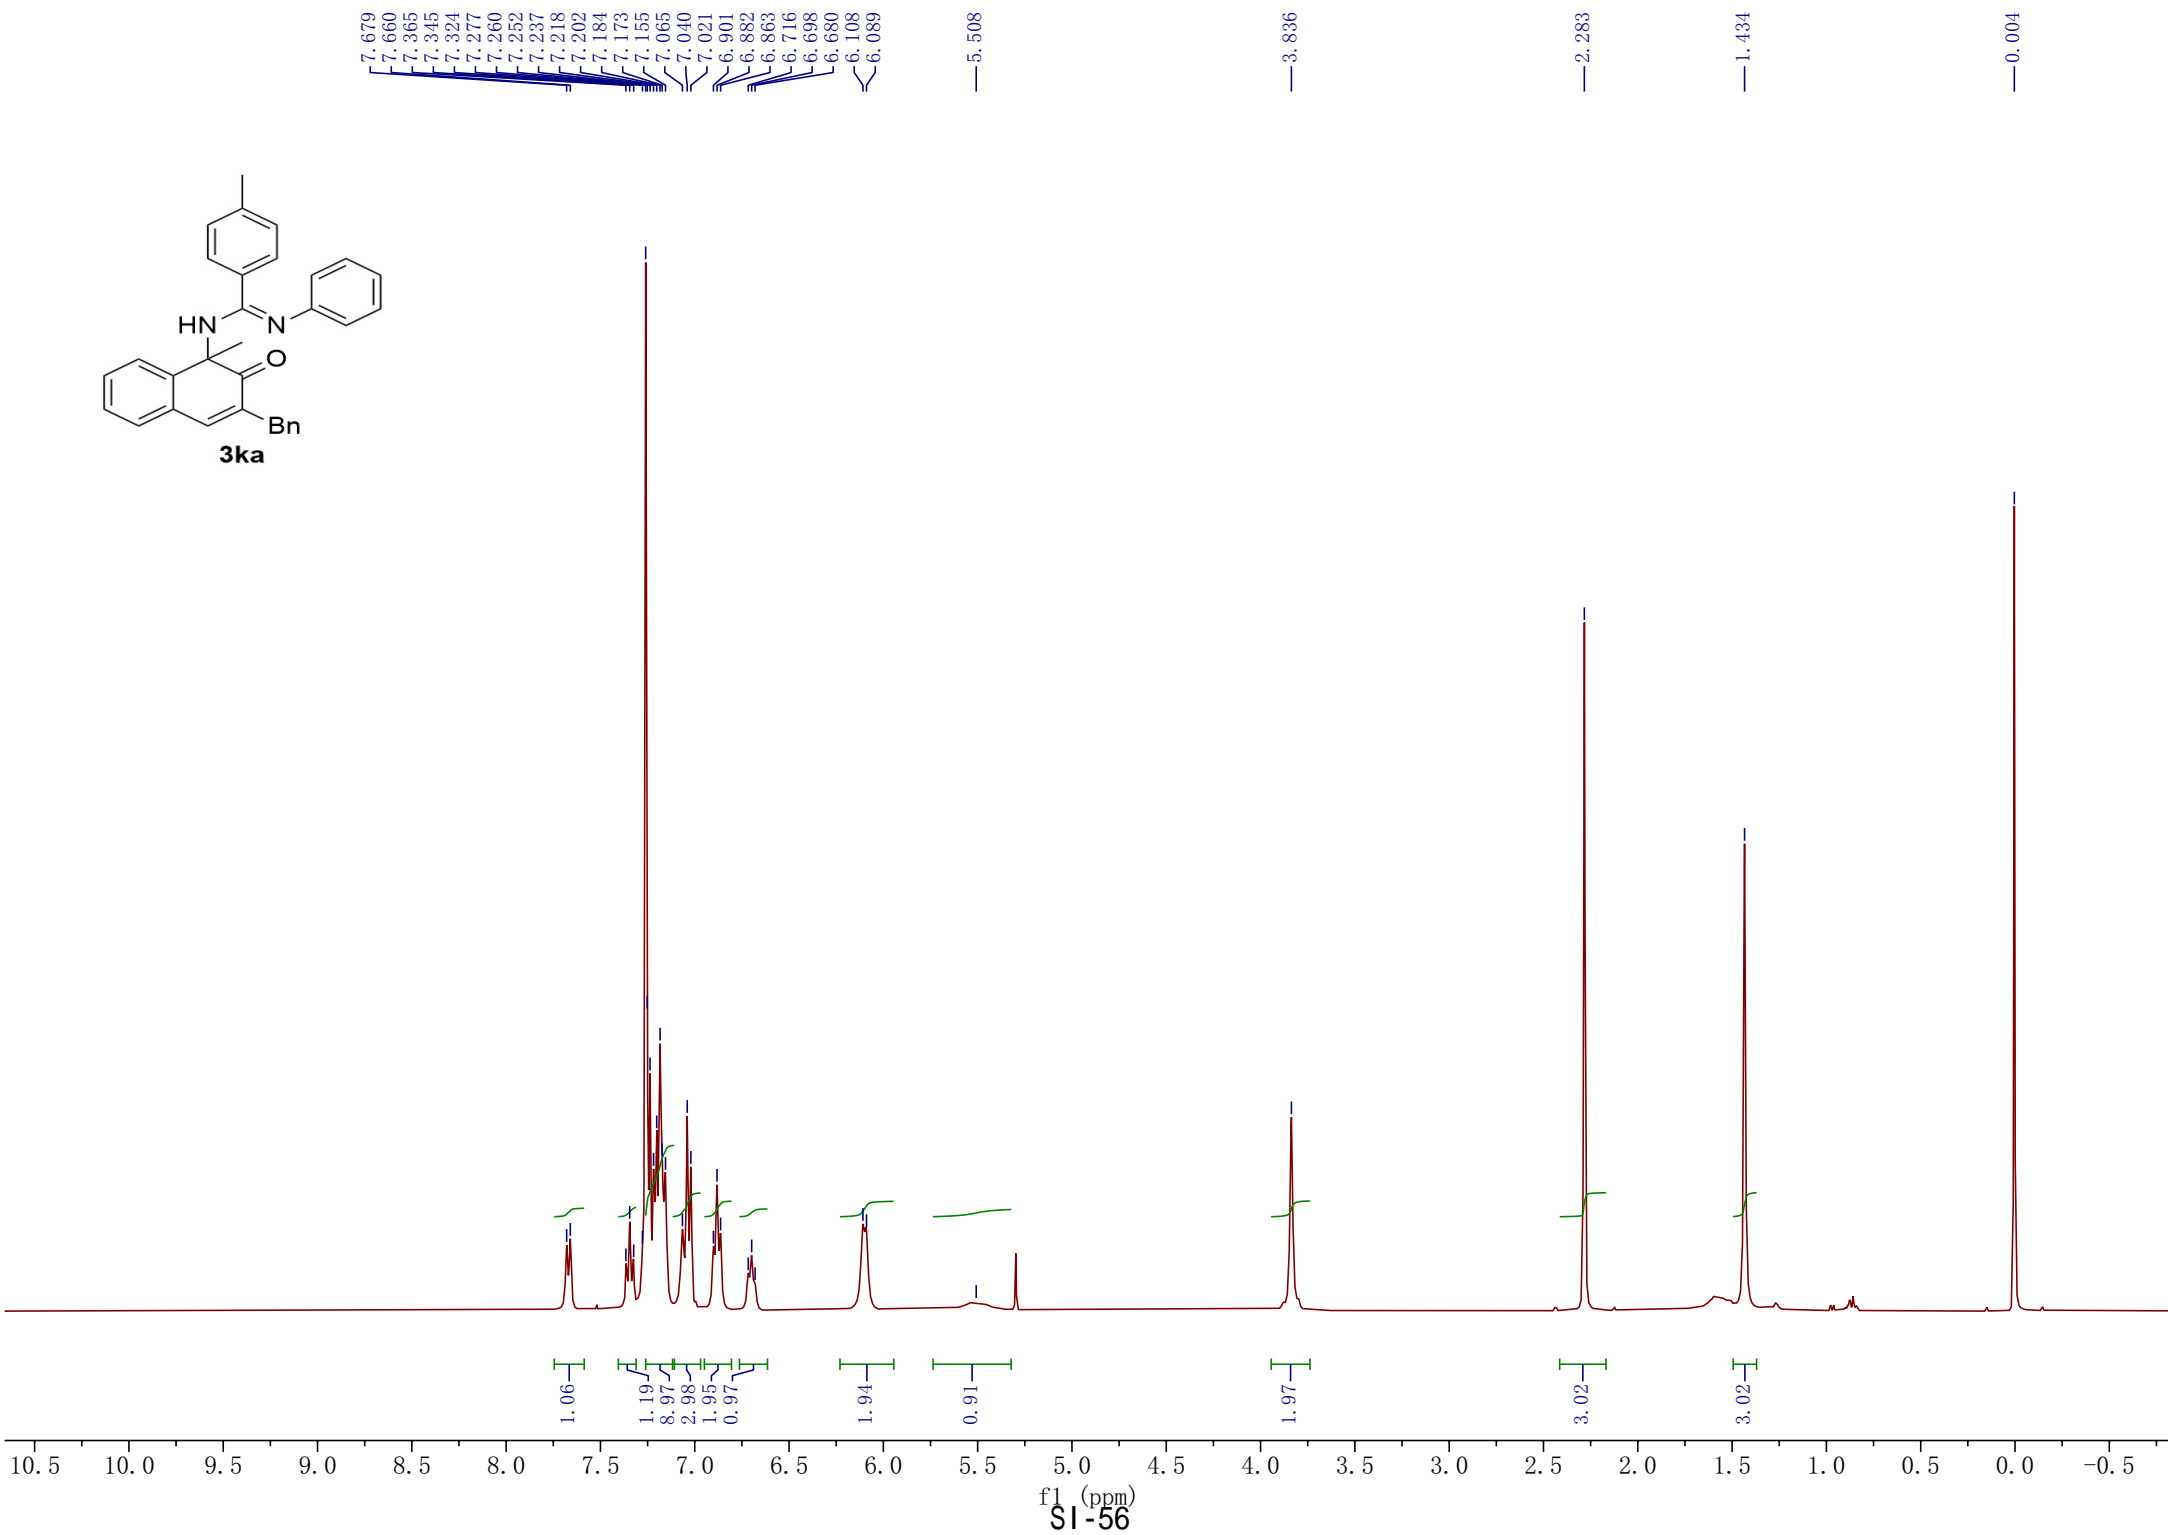



199.867

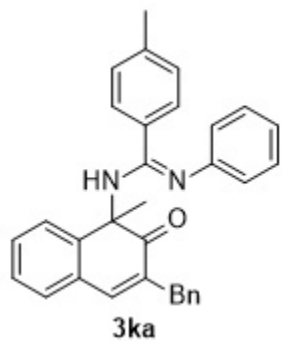

153.505  
149.700  
146.276  
140.950  
139.789  
139.485  
135.633  
130.831  
129.928  
129.312  
129.094  
128.955  
128.657  
128.503  
128.074  
126.631  
126.102  
123.792  
122.331  
121.319

77.478  
77.160  
76.842

62.073

35.609

28.977

21.454

0.135

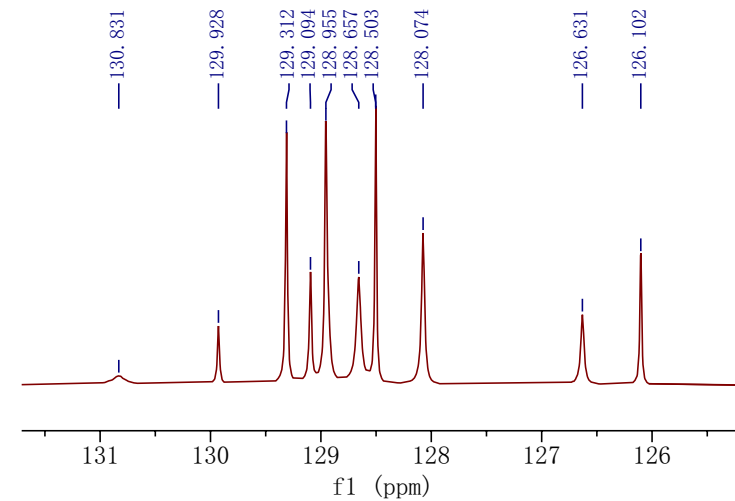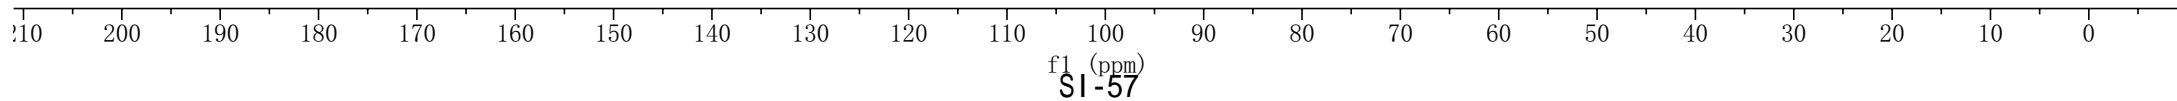

SI-57

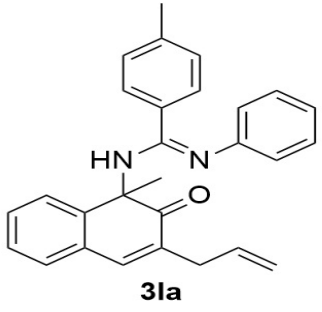

7.704  
7.685  
7.371  
7.356  
7.336  
7.260  
7.237  
7.220  
7.202  
7.187  
7.170  
7.044  
7.024  
6.909  
6.890  
6.871  
6.716  
6.697  
6.679  
6.202  
6.182  
6.026  
6.009  
6.000  
5.992  
5.983  
5.966  
5.957  
5.949  
5.941  
5.924  
5.578  
5.193  
5.188  
5.150  
5.145  
5.128  
5.102

3.310  
3.294  
3.271  
3.254  
3.237  
3.213  
3.197

2.285

1.454

0.009

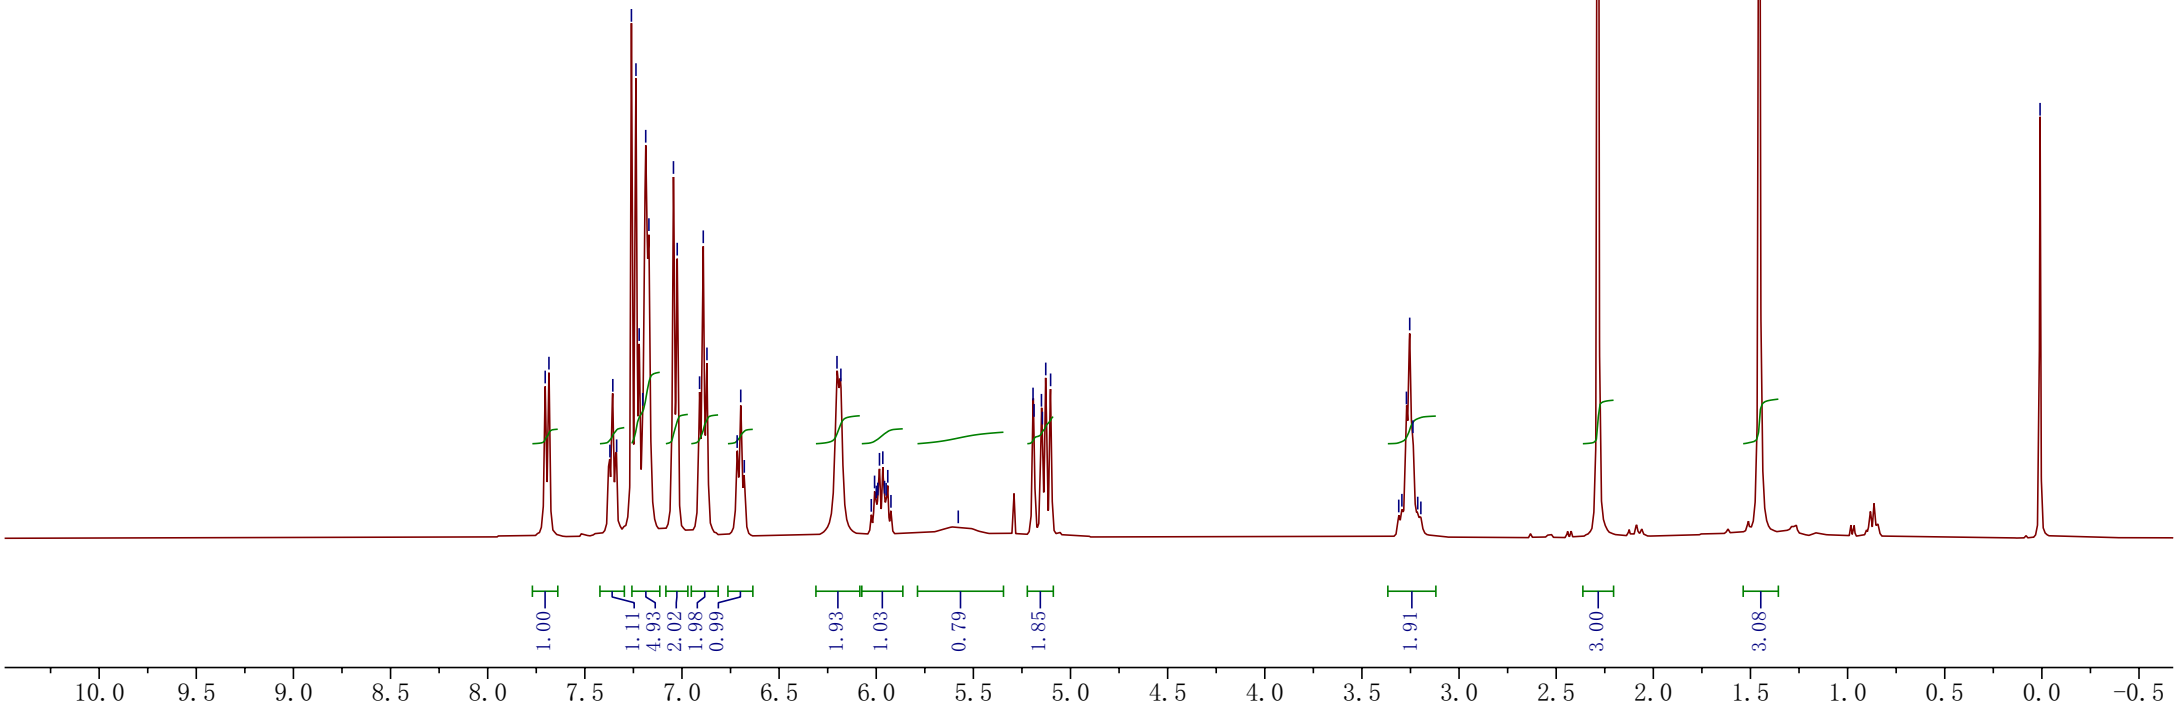

SI-58

198.679

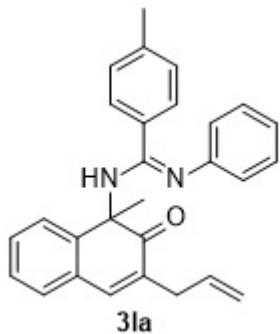

153.725  
149.498  
146.115  
140.051  
139.538  
135.796  
134.354  
130.662  
129.942  
129.014  
128.945  
128.794  
128.685  
128.071  
126.663  
123.875  
122.363  
121.425  
116.776

77.477  
77.160  
76.842

62.110

33.615

28.894

21.446

130.662

129.942

129.014

128.945

128.794

128.685

128.071

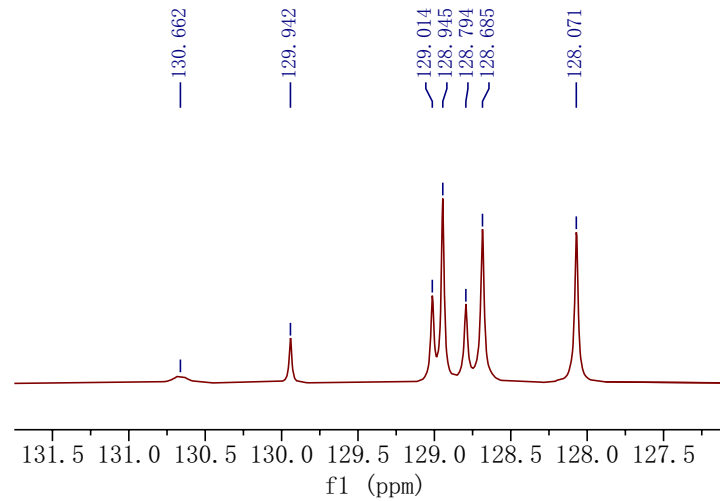

210 200 190 180 170 160 150 140 130 120 110 100 90 80 70 60 50 40 30 20 10 0 -10

f1 (ppm)  
SI-59

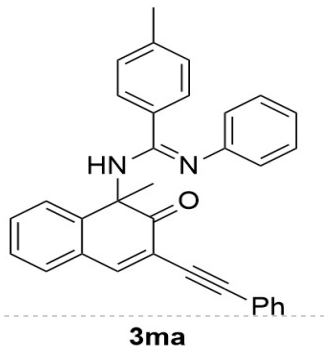

7.797  
7.777  
7.517  
7.498  
7.486  
7.458  
7.450  
7.442  
7.428  
7.399  
7.380  
7.365  
7.357  
7.315  
7.260  
7.247  
7.234  
7.217  
7.049  
7.032  
7.013  
6.993  
6.916  
6.631

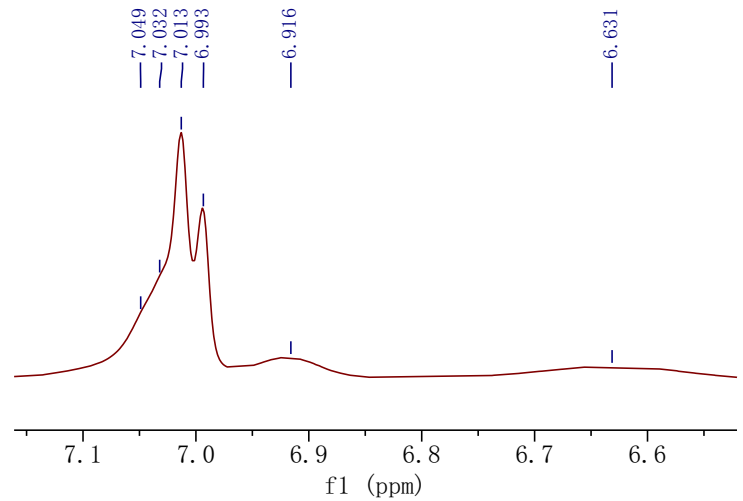

2.266

1.614

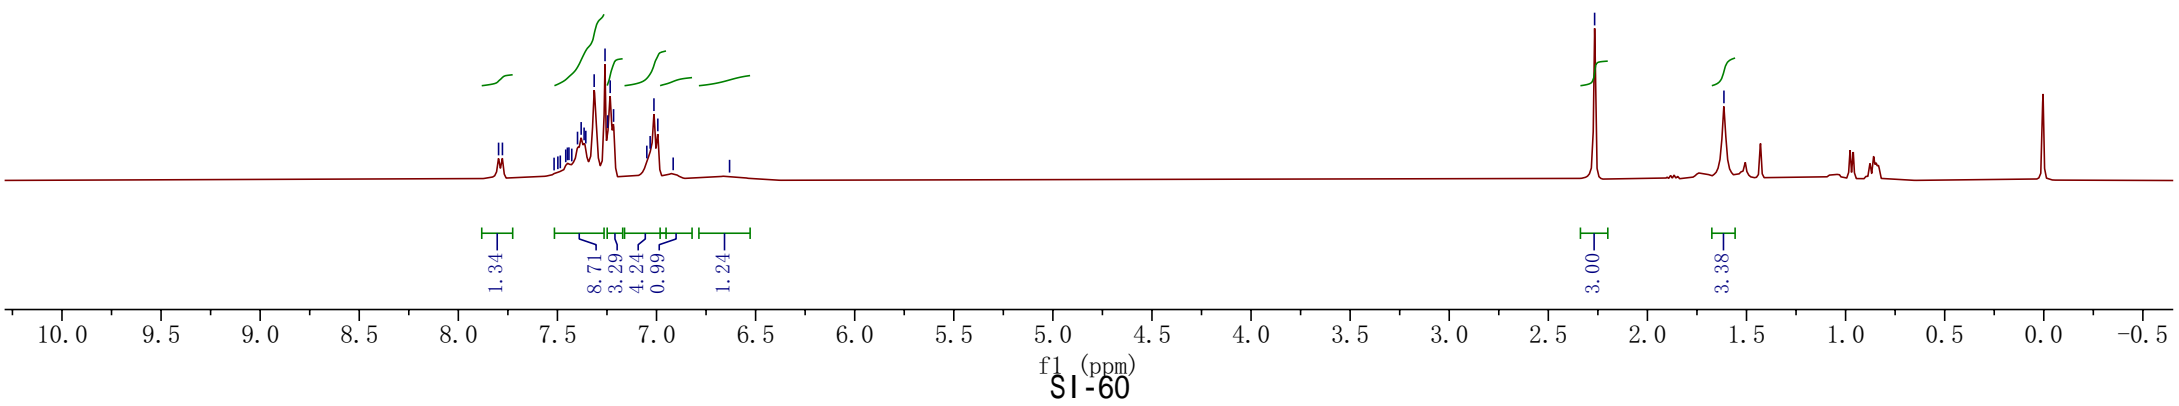

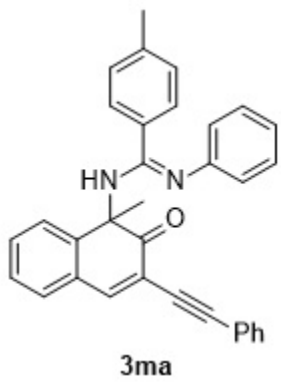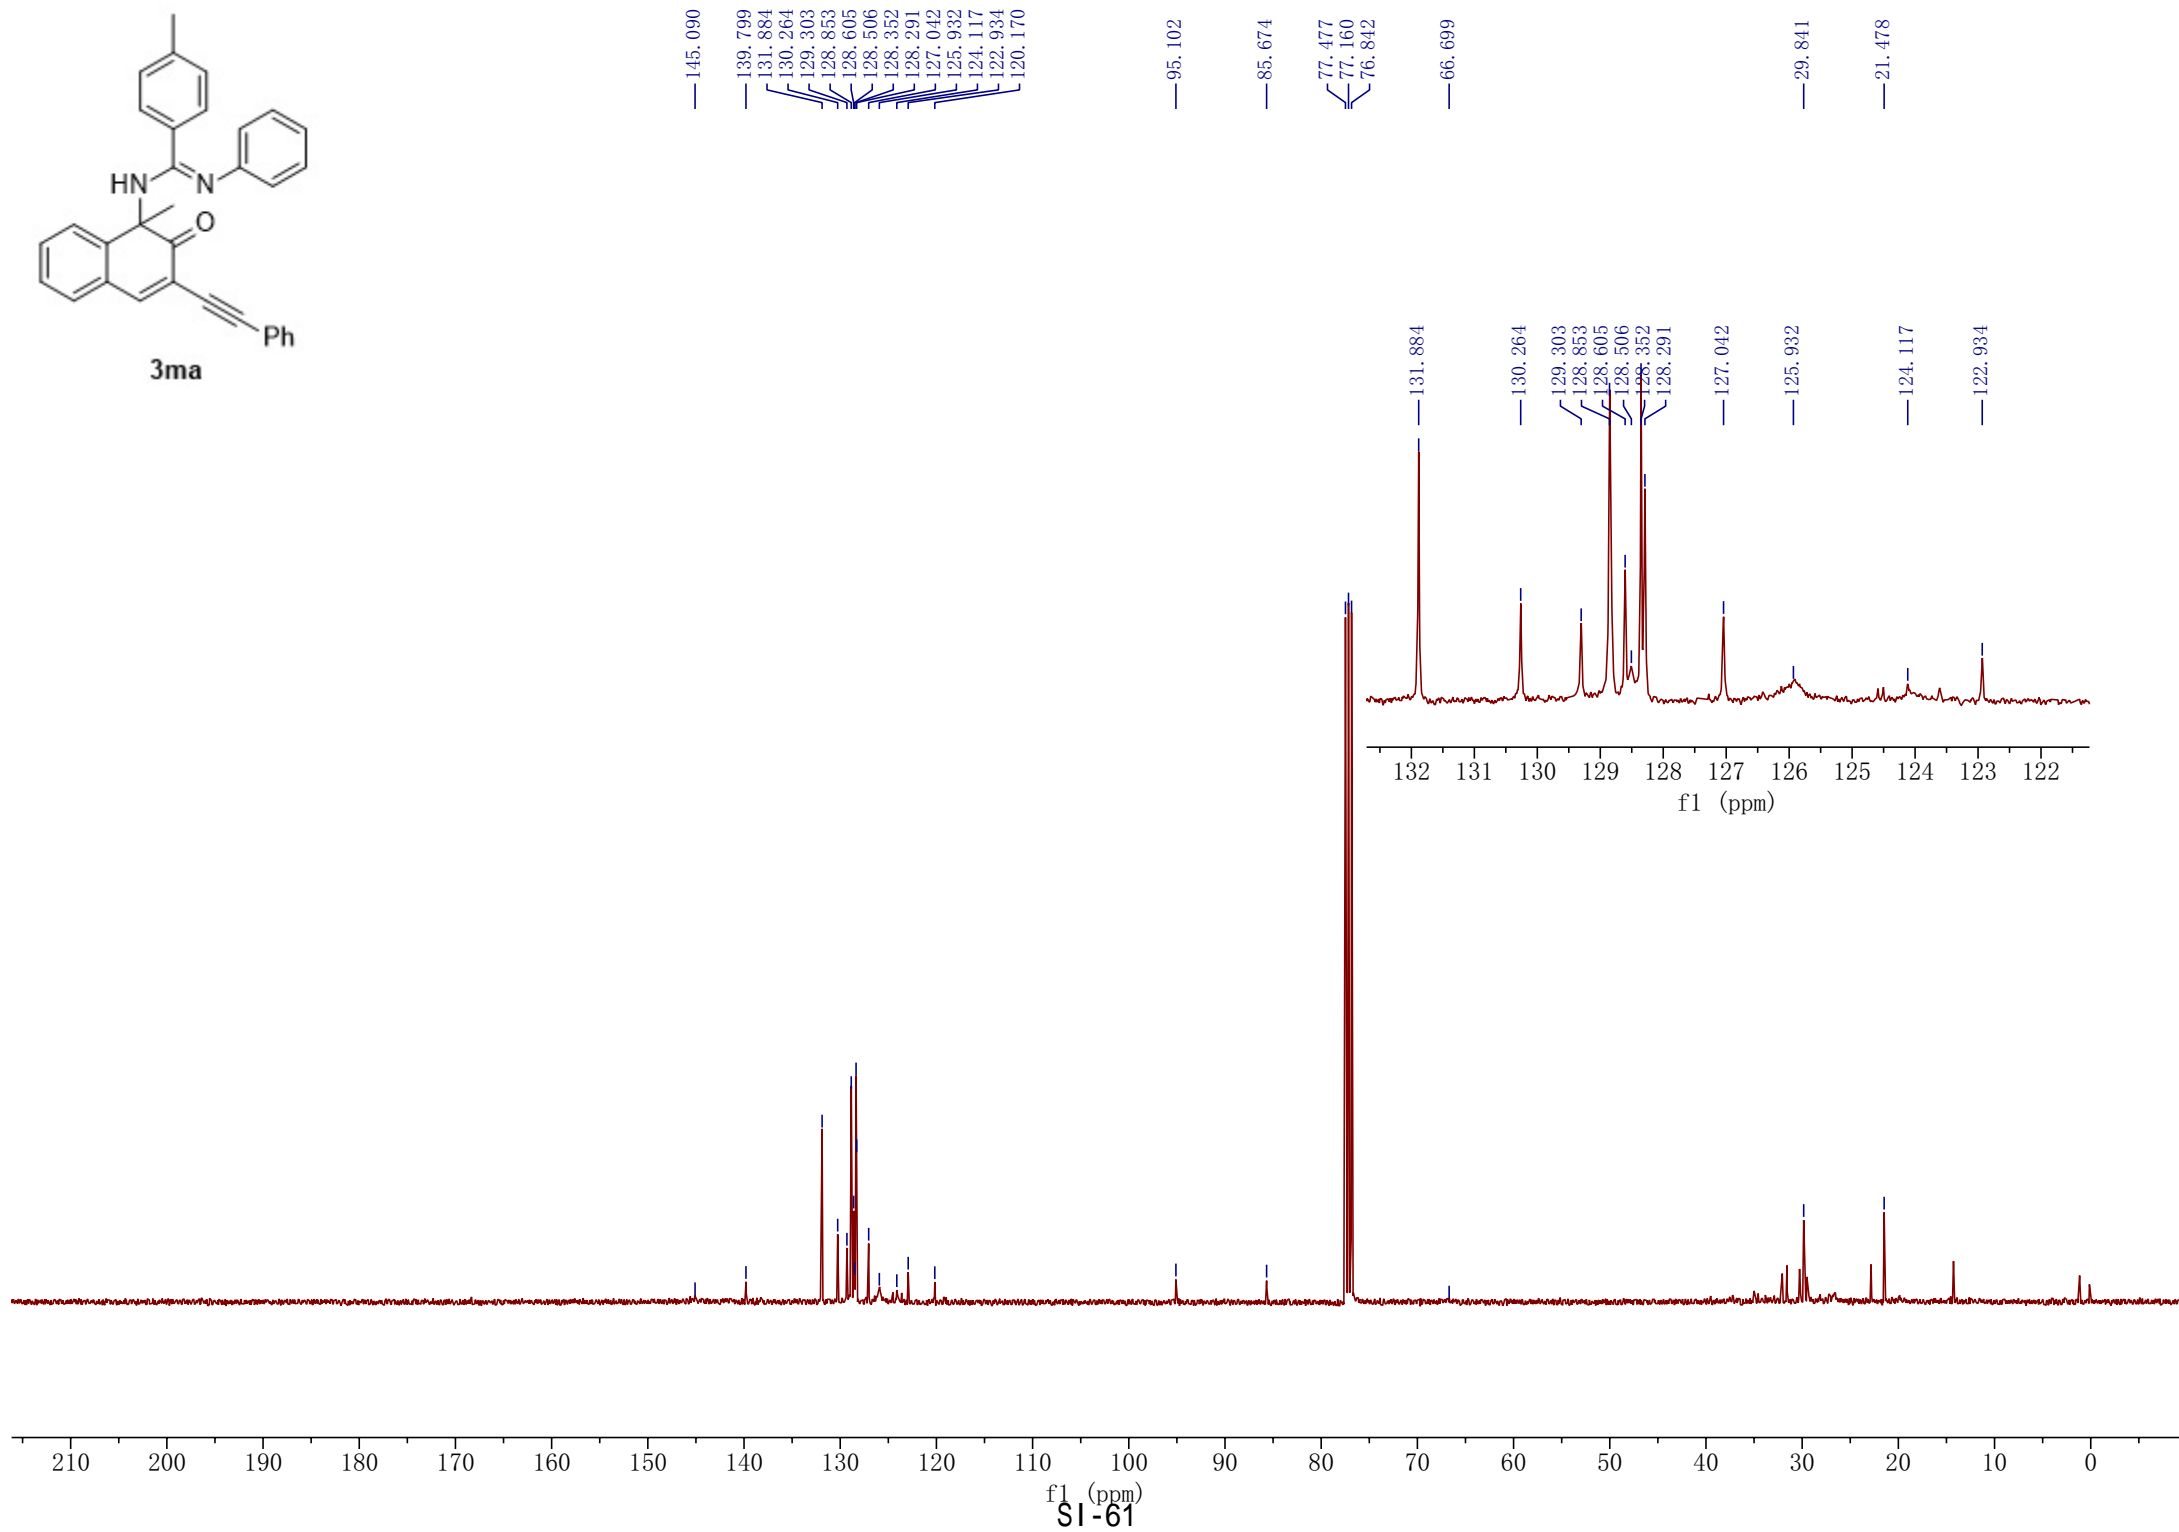

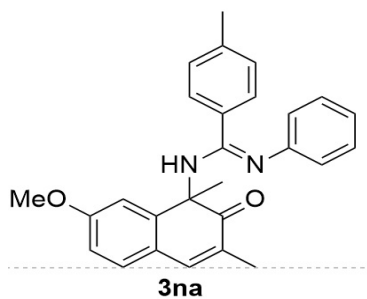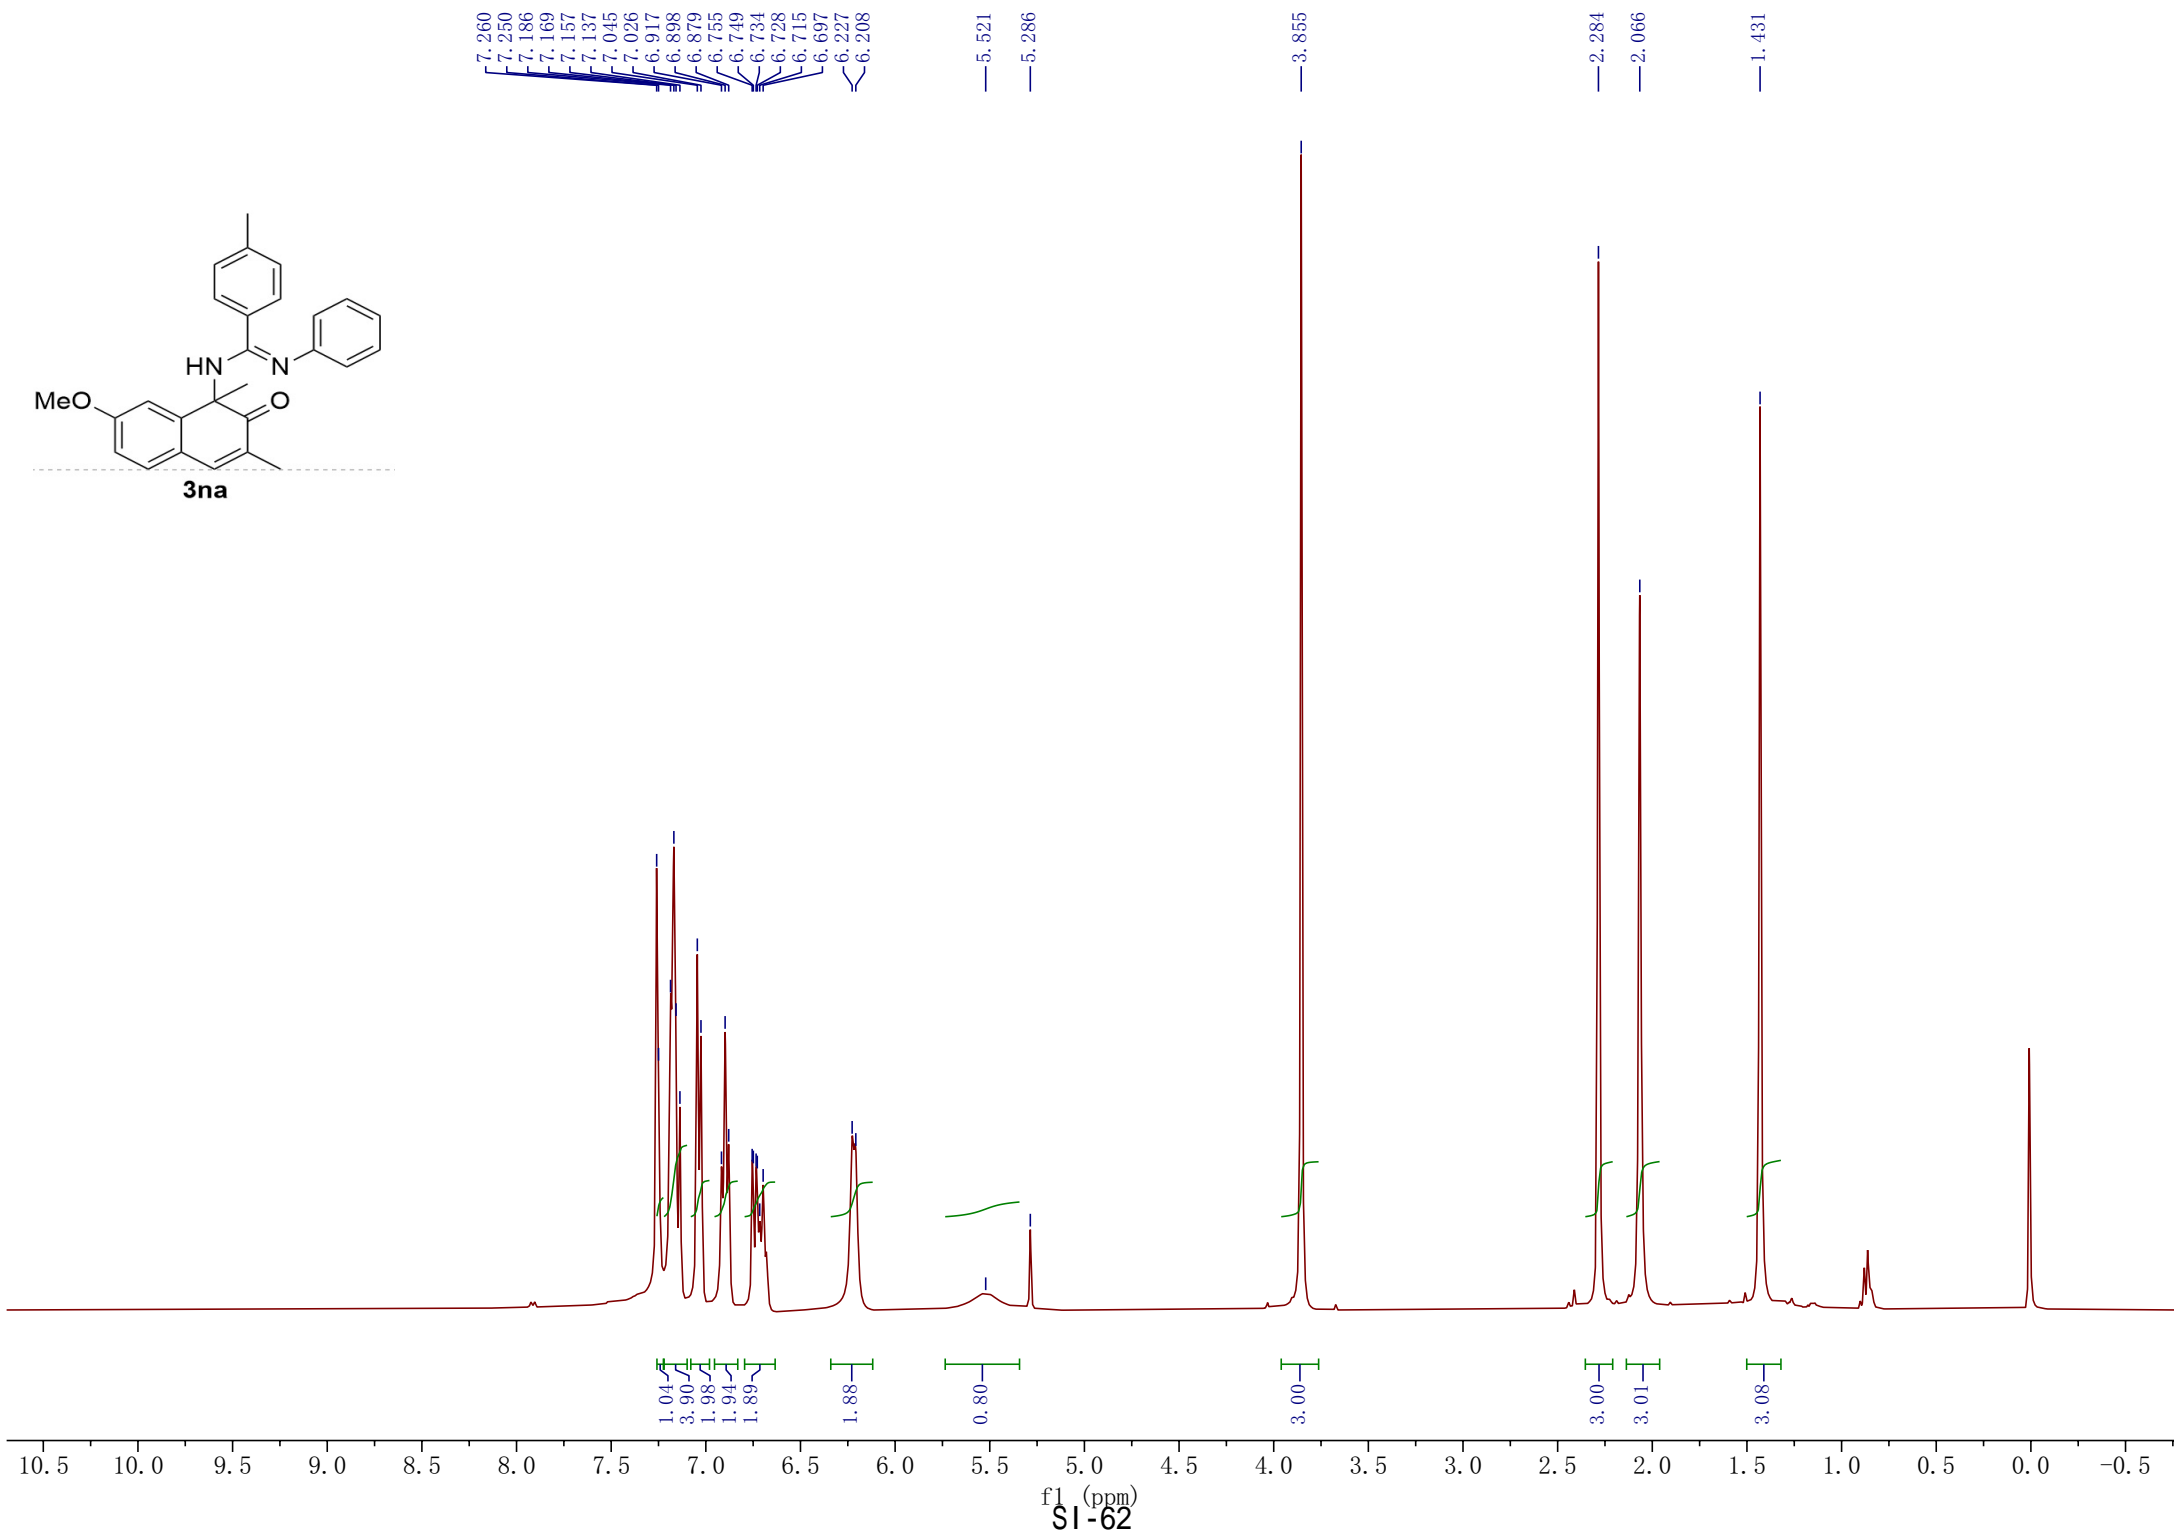

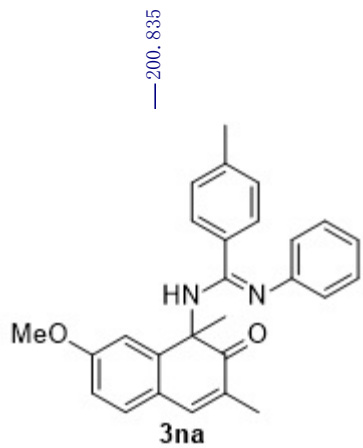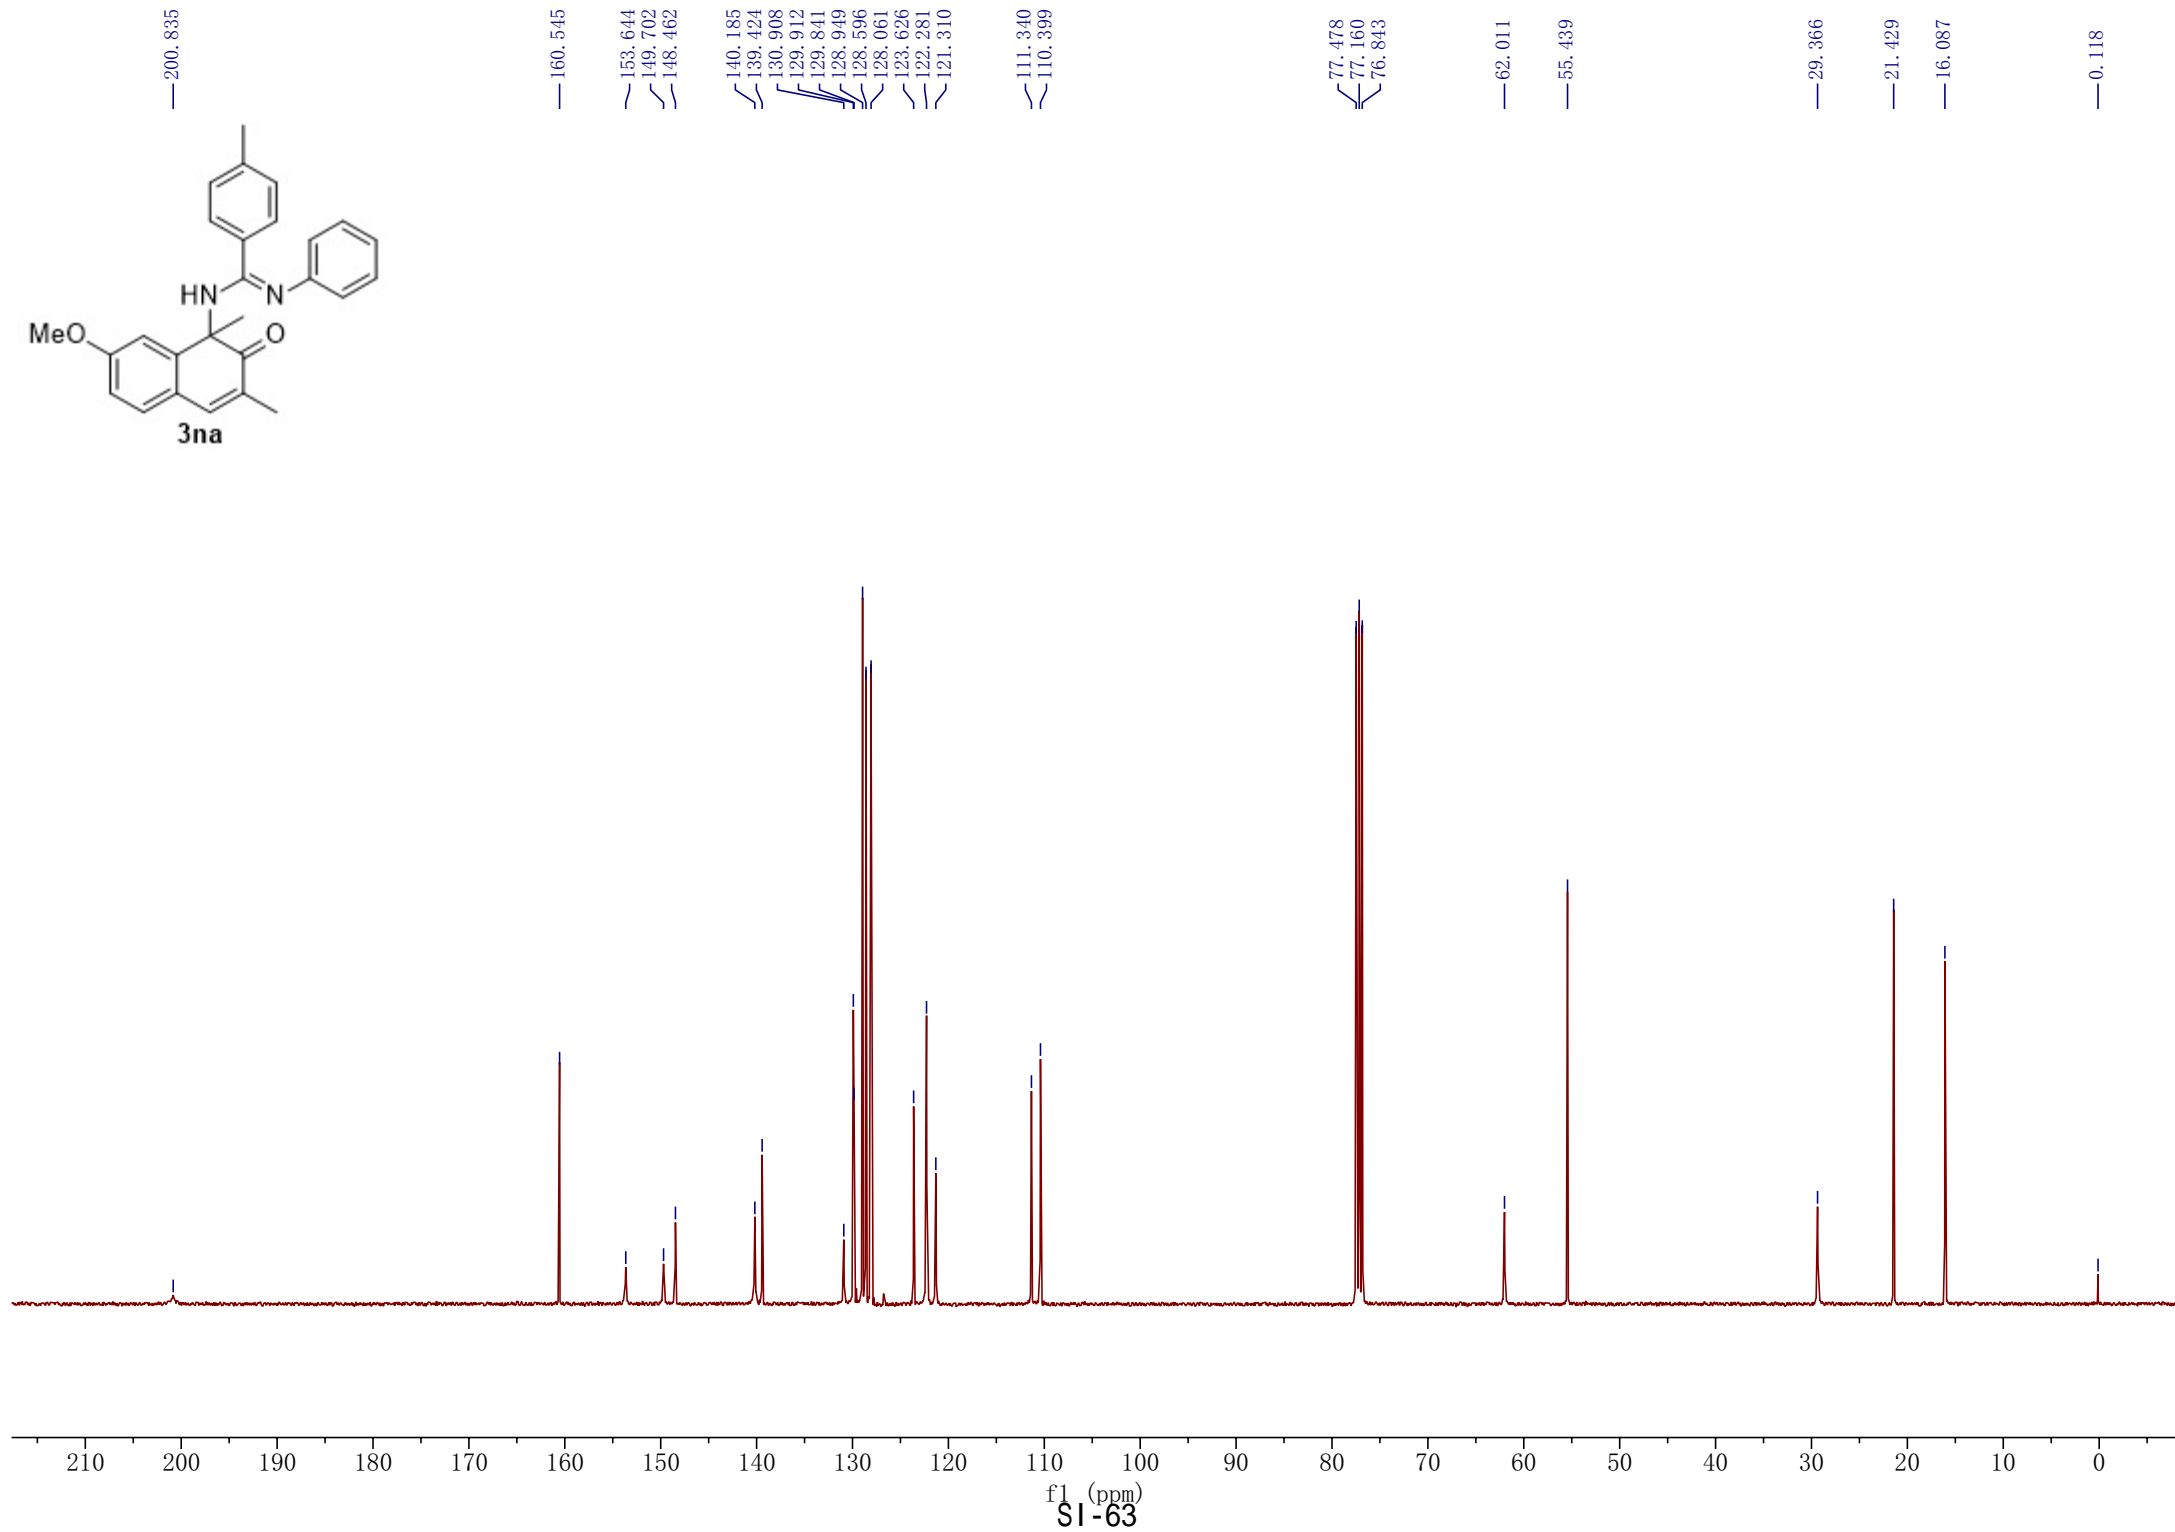

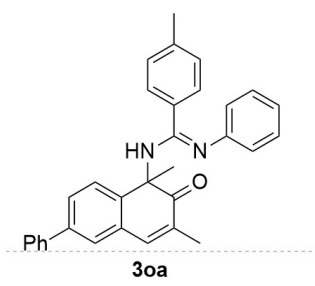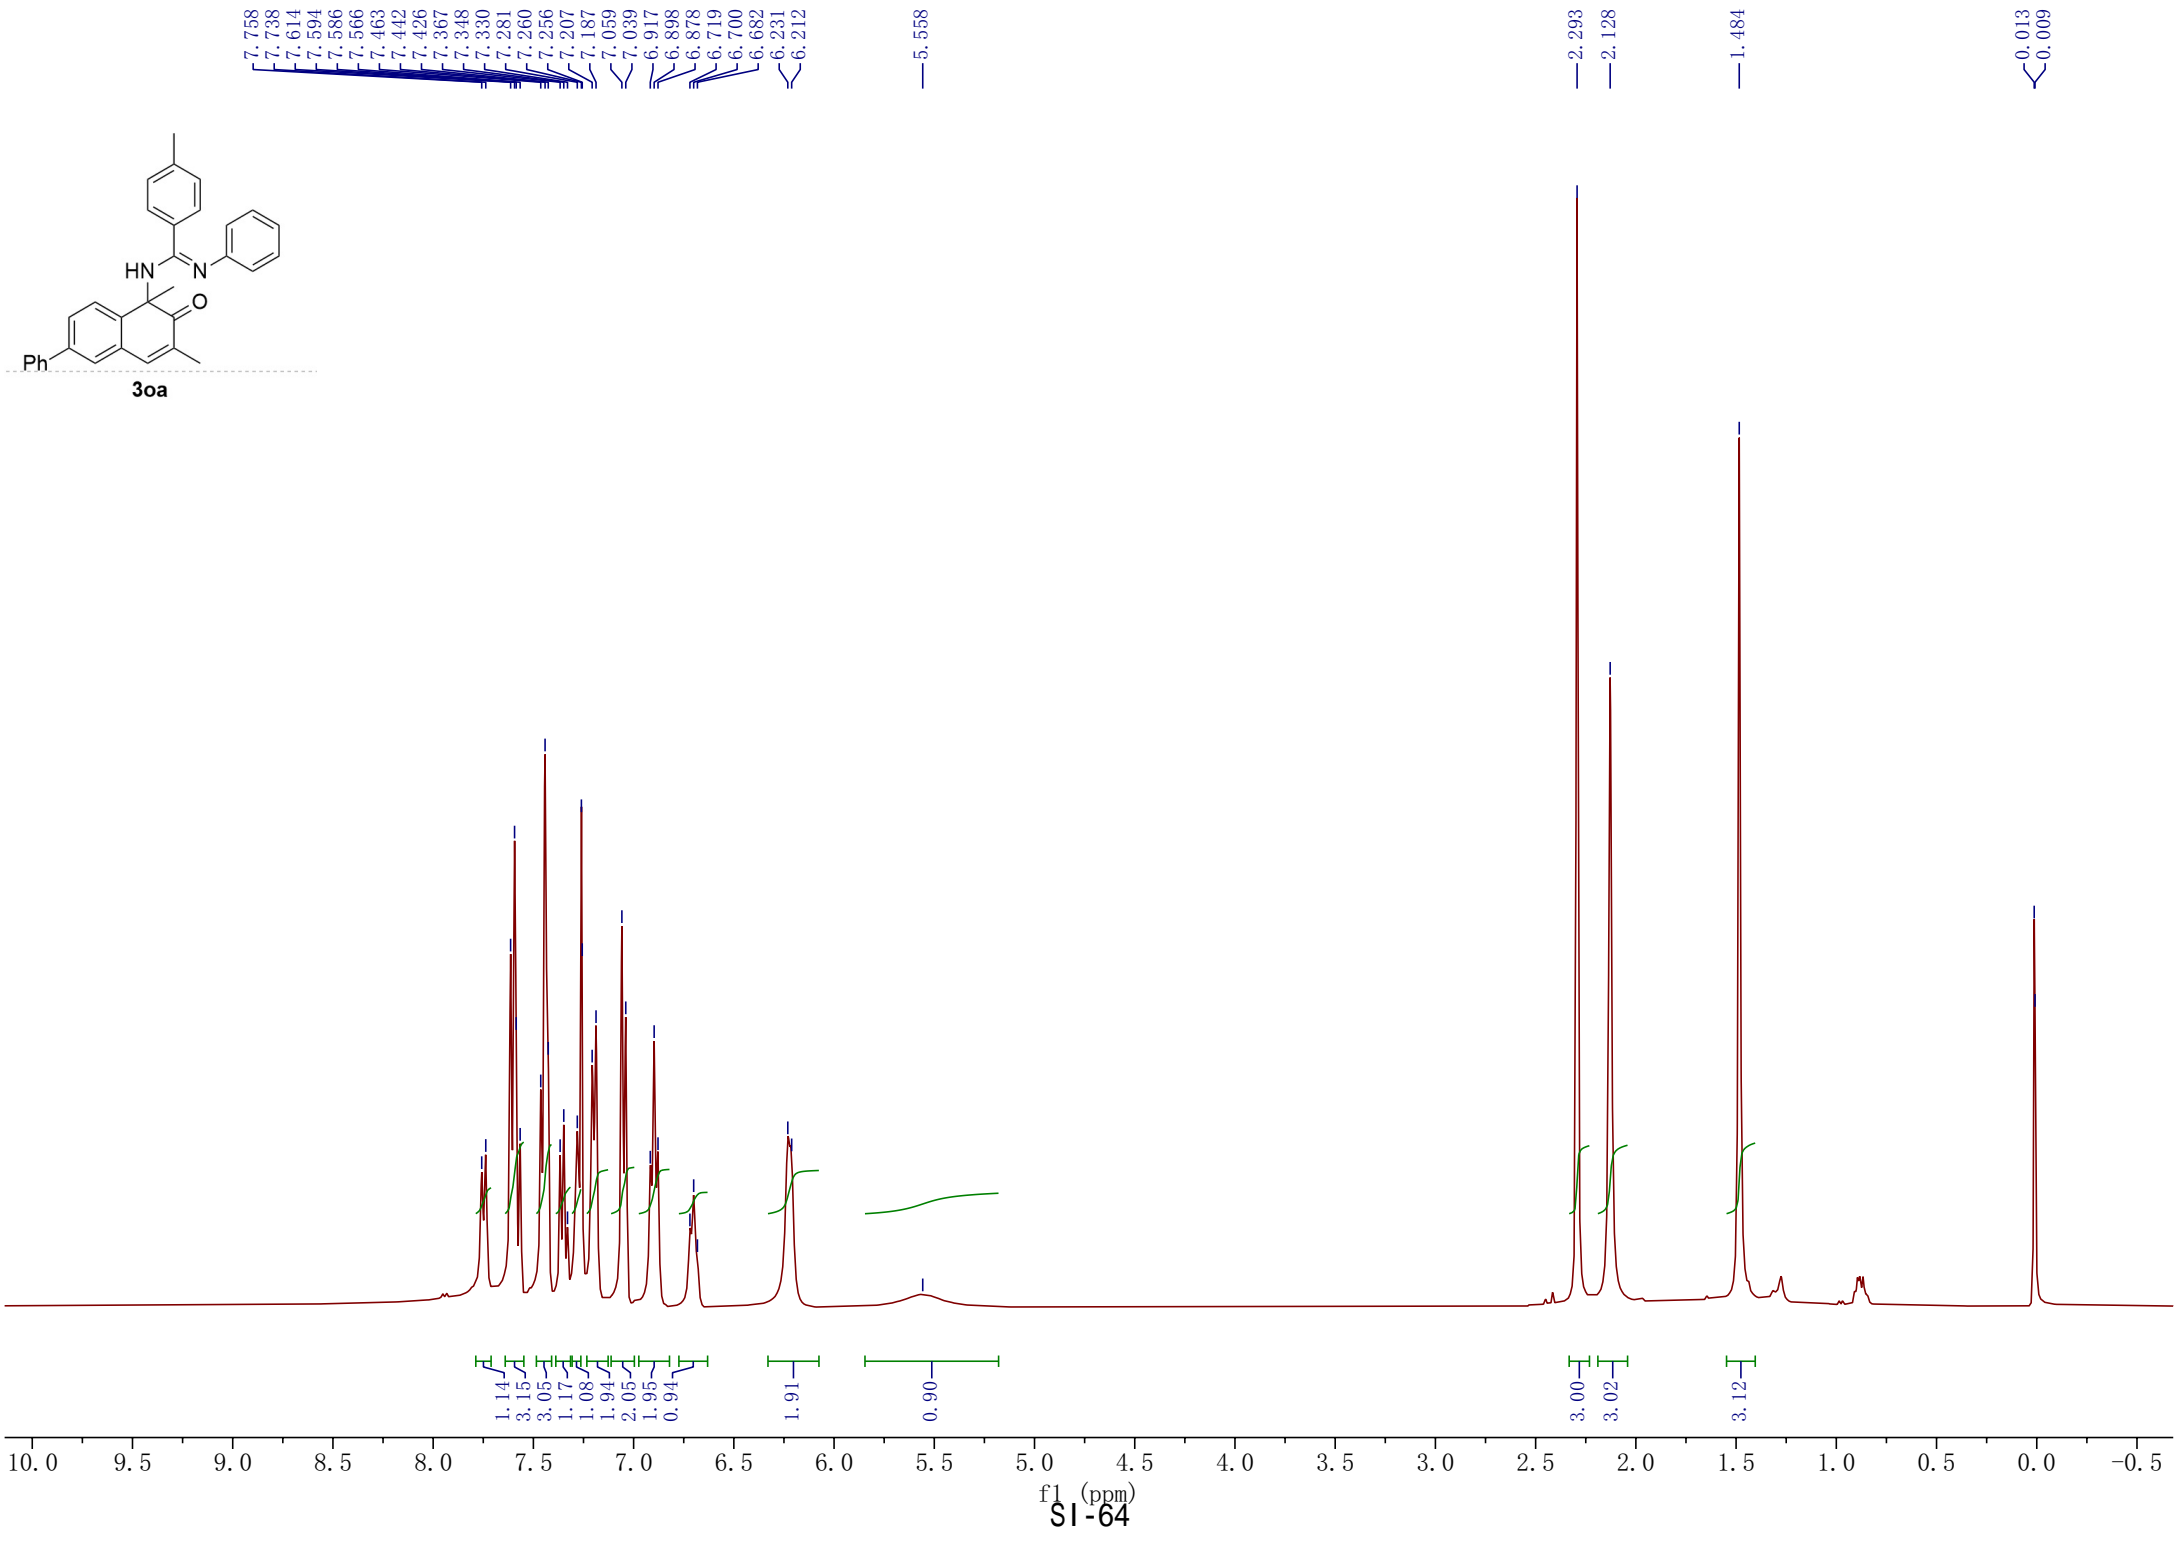



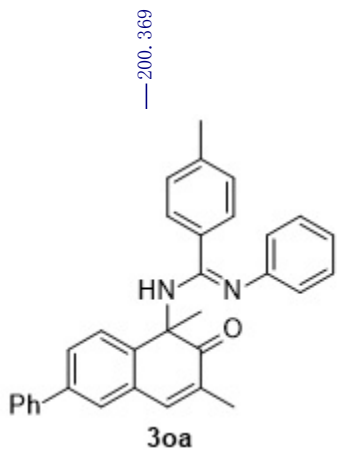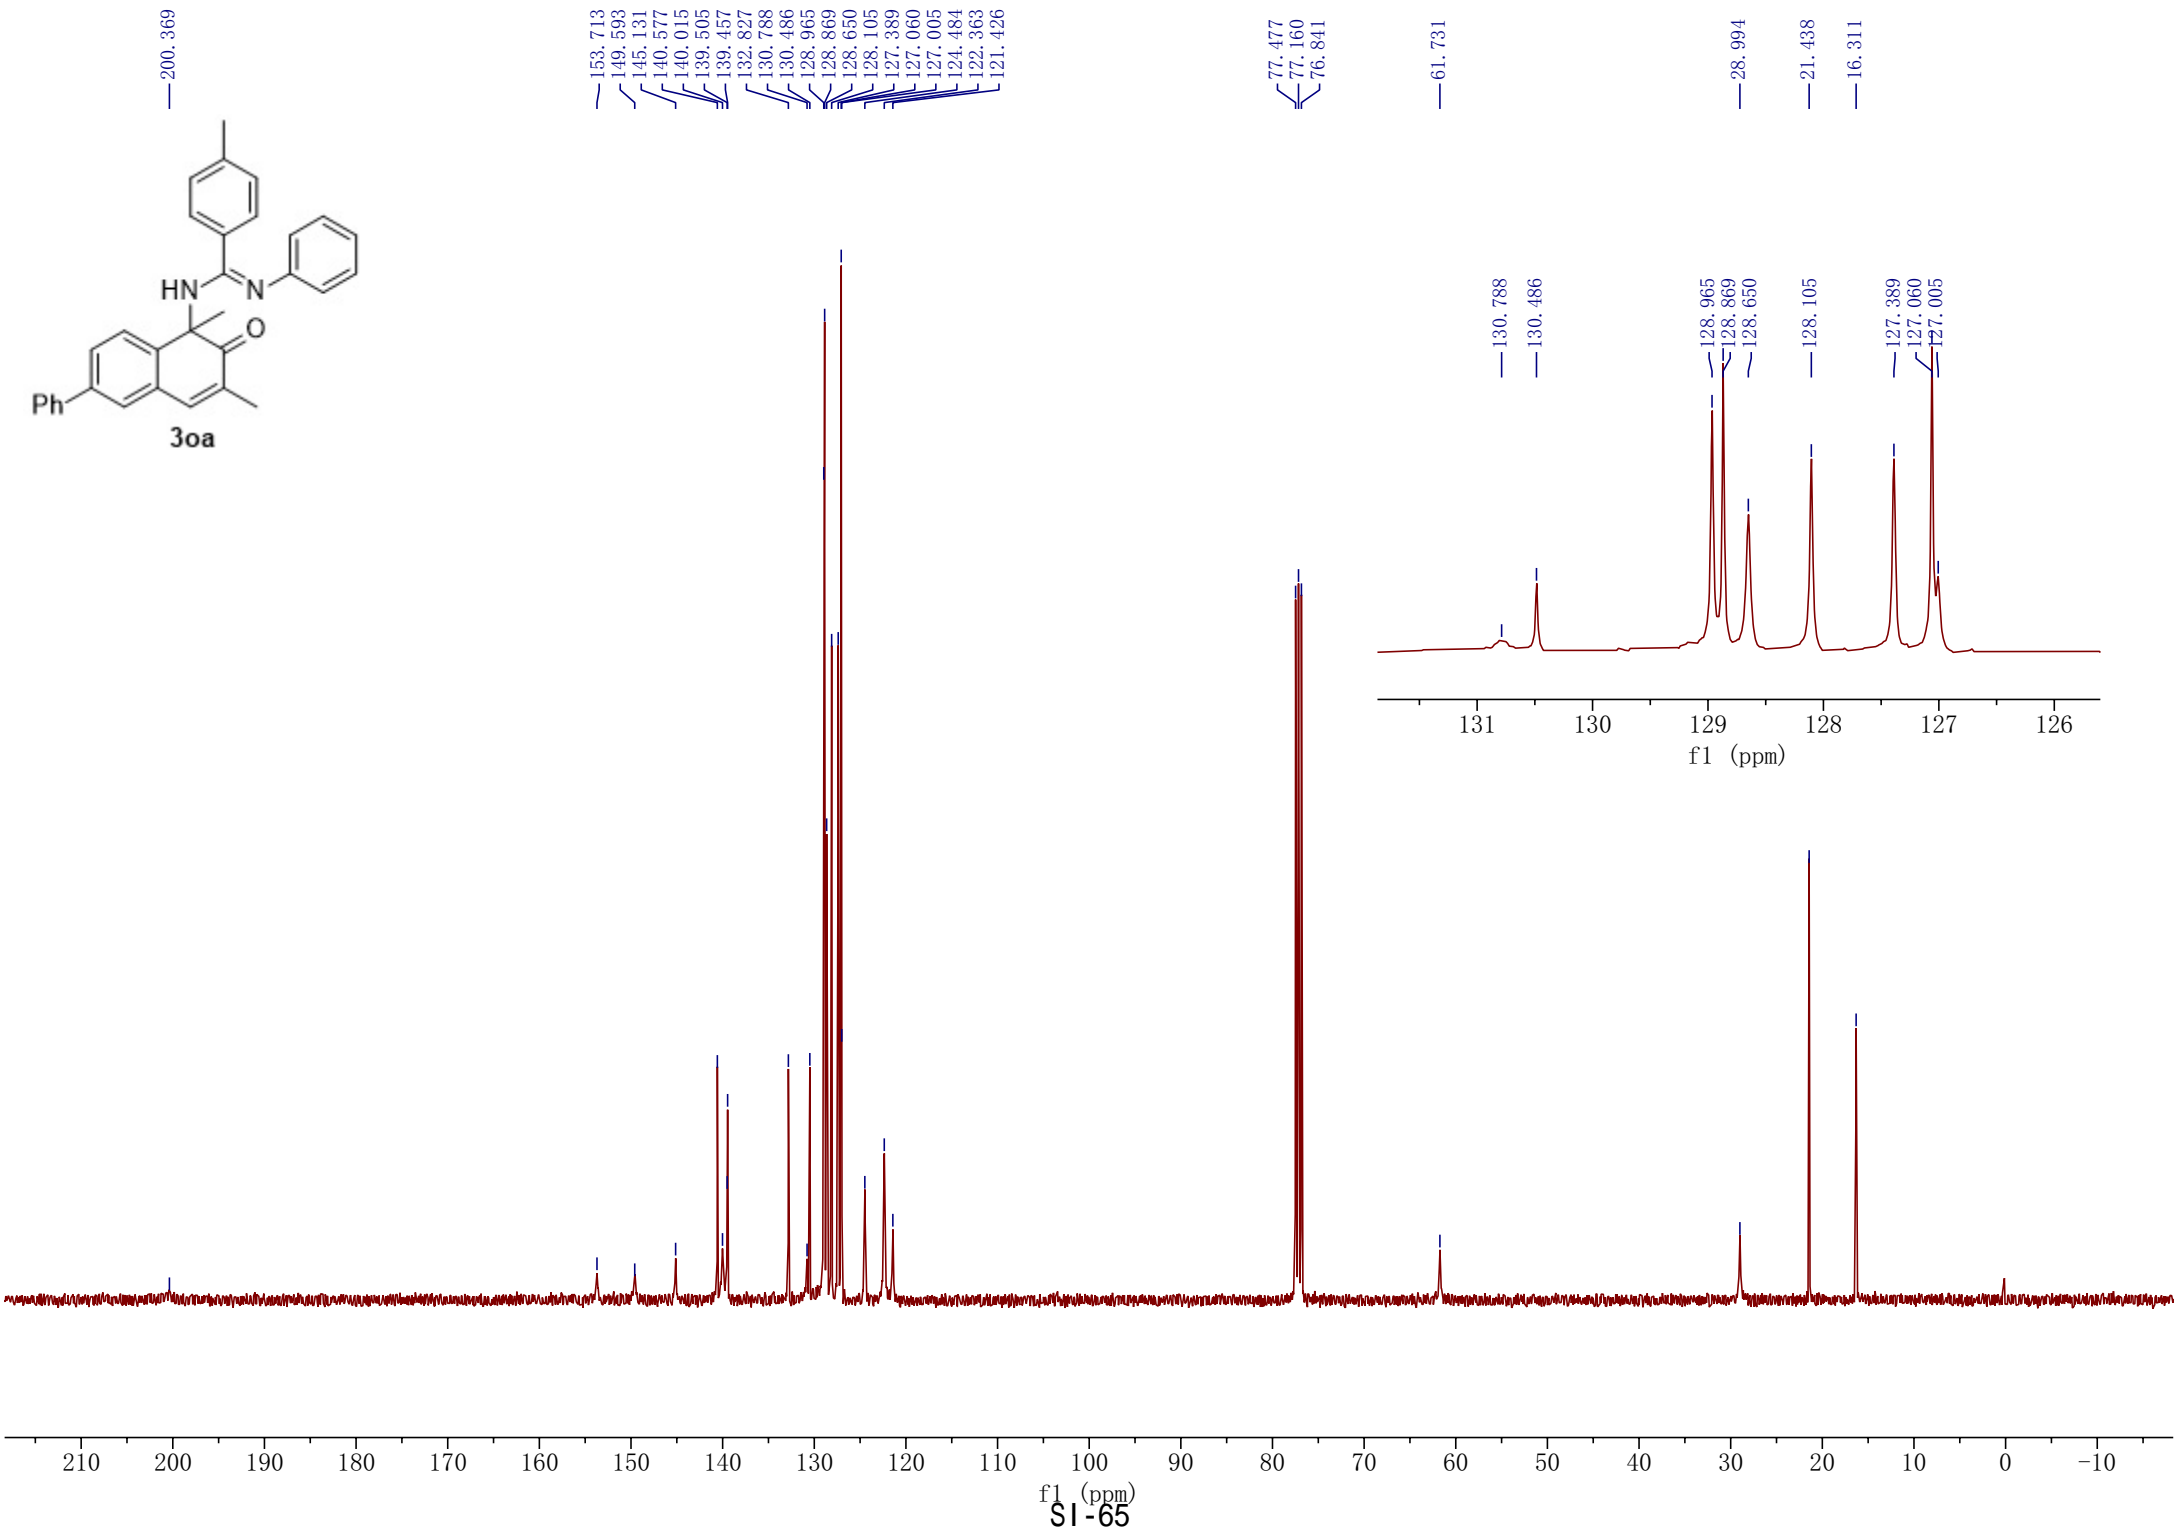

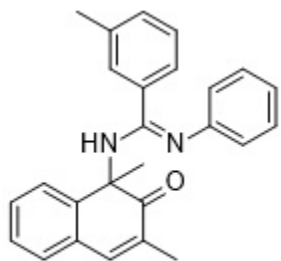

3ab

7.689  
7.670  
7.401  
7.370  
7.359  
7.349  
7.339  
7.328  
7.285  
7.260  
7.223  
7.212  
7.137  
7.117  
7.098  
7.084  
7.014  
6.998  
6.898  
6.879  
6.860  
6.699  
6.681  
6.662  
6.187  
6.168

—5.525

—2.263

—2.097

—1.447

—0.001

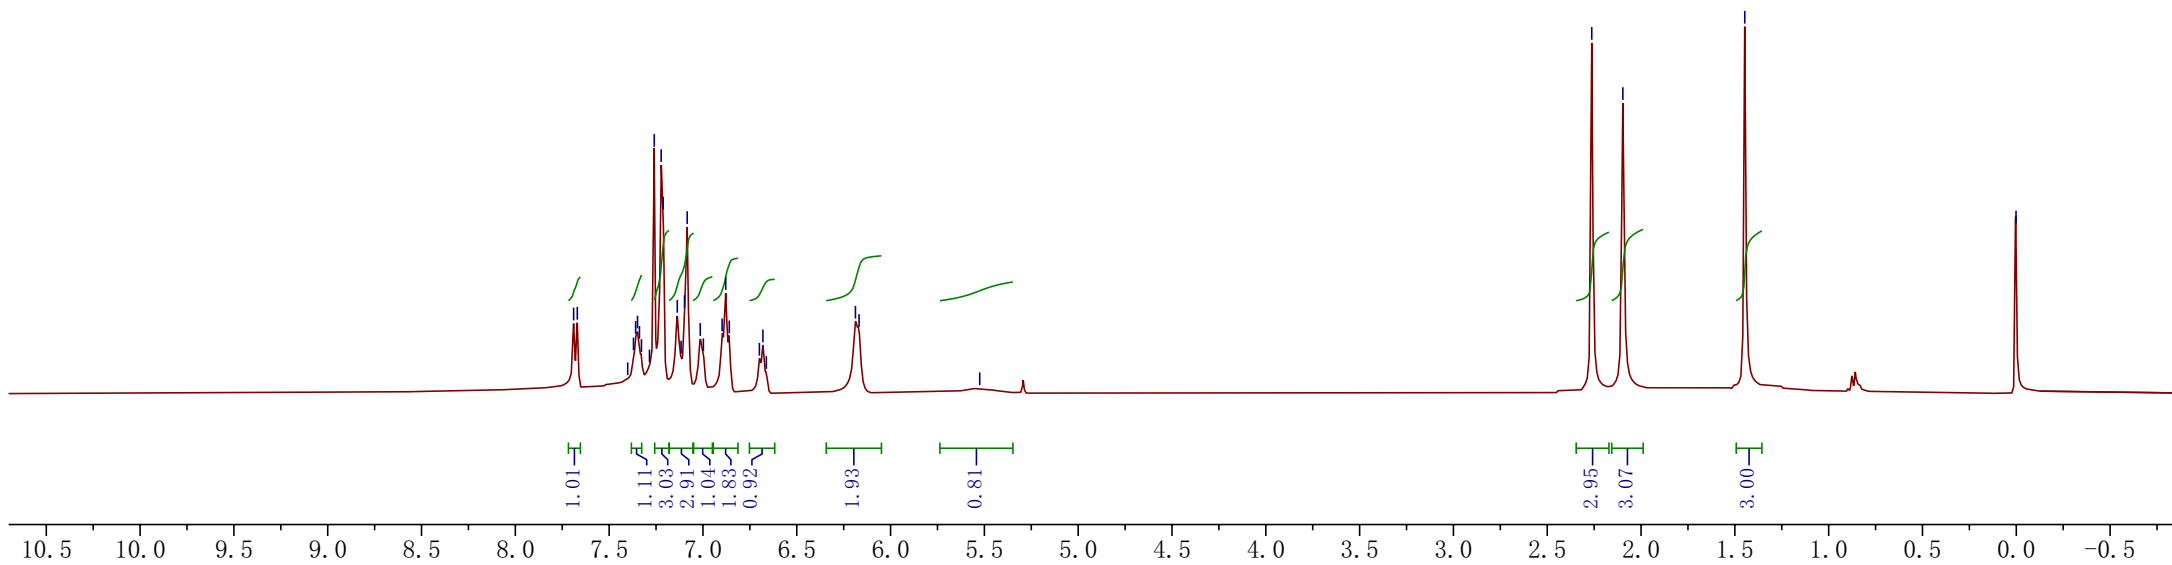

f1 (ppm)  
SI-66

— 200.542

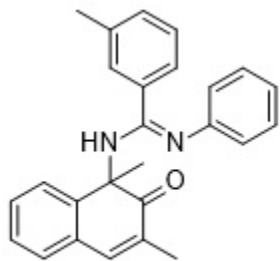

3ab

153.747  
149.462  
146.169  
140.154  
137.973  
133.743  
132.375  
130.122  
130.087  
129.122  
128.719  
128.400  
128.079  
128.017  
126.586  
125.836  
123.890  
122.278  
121.410

77.478  
77.160  
76.843

— 61.862

— 28.995

— 21.380

— 16.198

130.122  
130.087

— 129.122

— 128.719

— 128.400

128.079  
128.017

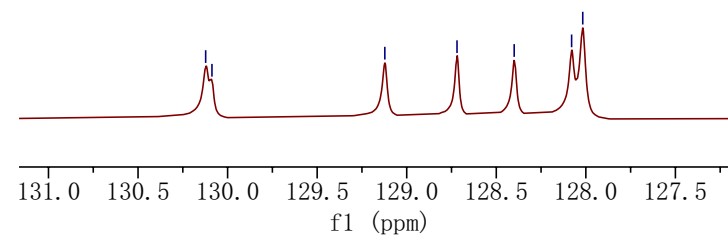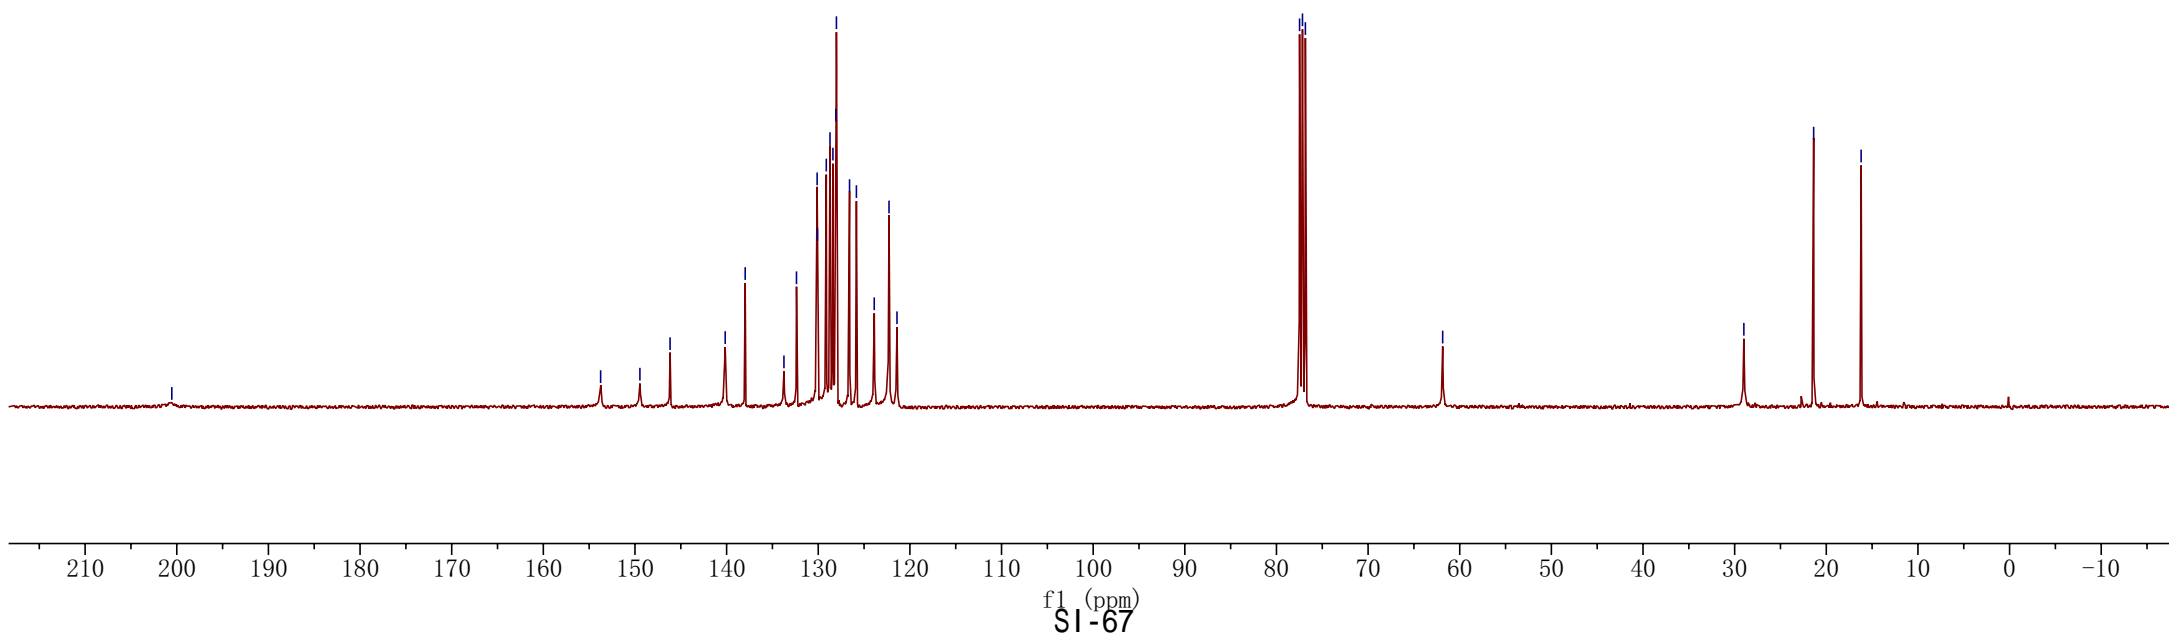

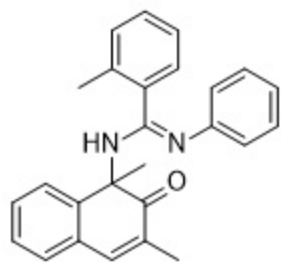

3ac

7.696  
7.677  
7.401  
7.392  
7.380  
7.369  
7.360  
7.349  
7.330  
7.310  
7.260  
7.250  
7.229  
7.210  
7.191  
7.173  
7.168  
7.150  
7.132  
7.040  
7.021  
6.863  
6.844  
6.825  
6.678  
6.660  
6.641  
6.175  
6.155

5.437  
5.432

2.120

1.435

0.013

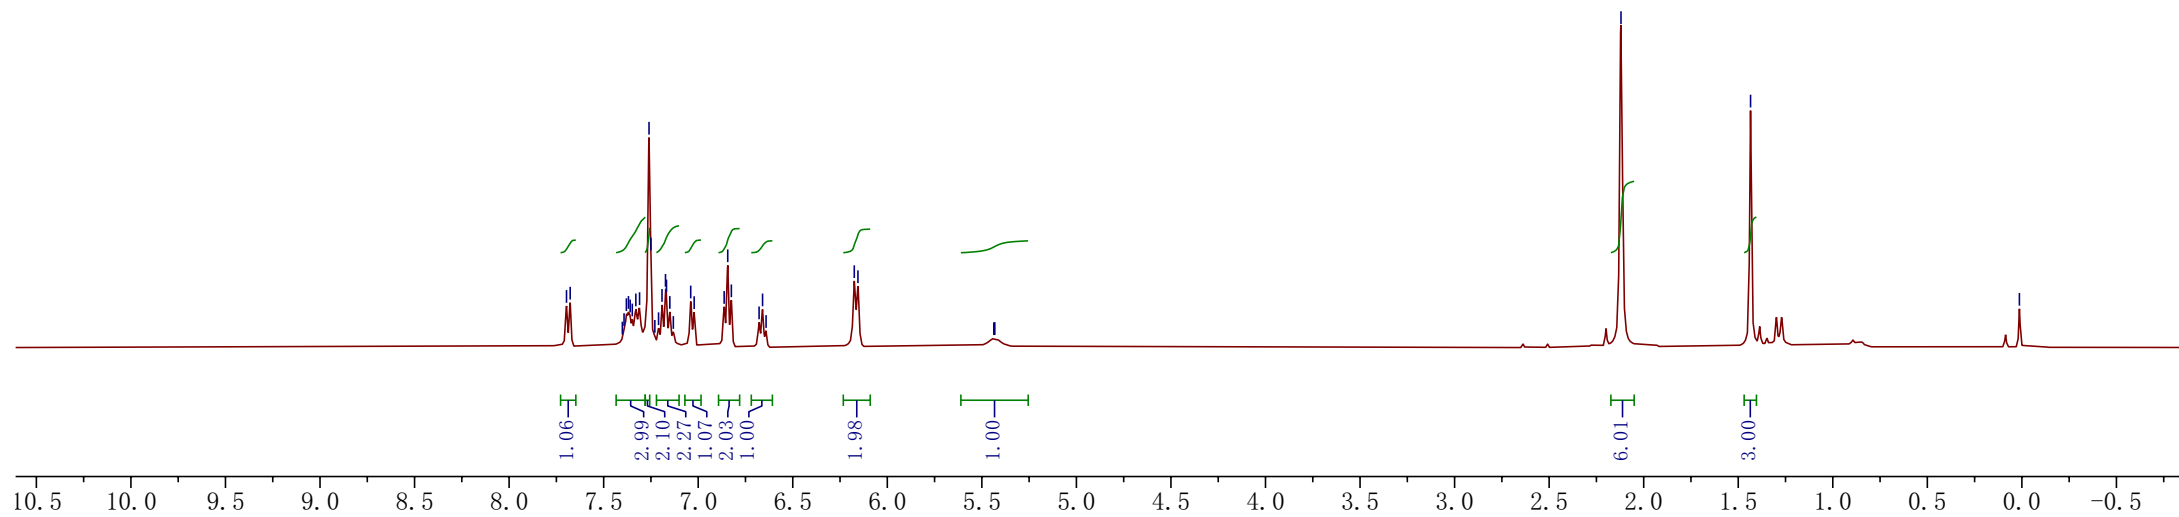

— 200.796

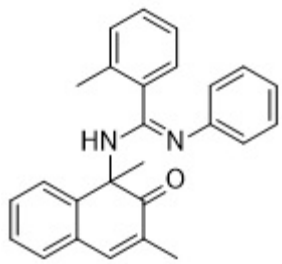

**3ac**

— 154.055

— 149.065

— 146.301

— 140.251

— 135.933

— 134.067

— 132.401

— 130.176

— 130.141

— 129.555

— 128.987

— 128.681

— 128.409

— 127.833

— 126.622

— 125.406

— 124.012

— 122.077

— 121.611

— 77.479

— 77.161

— 76.844

— 61.579

— 28.990

— 19.480

— 16.270

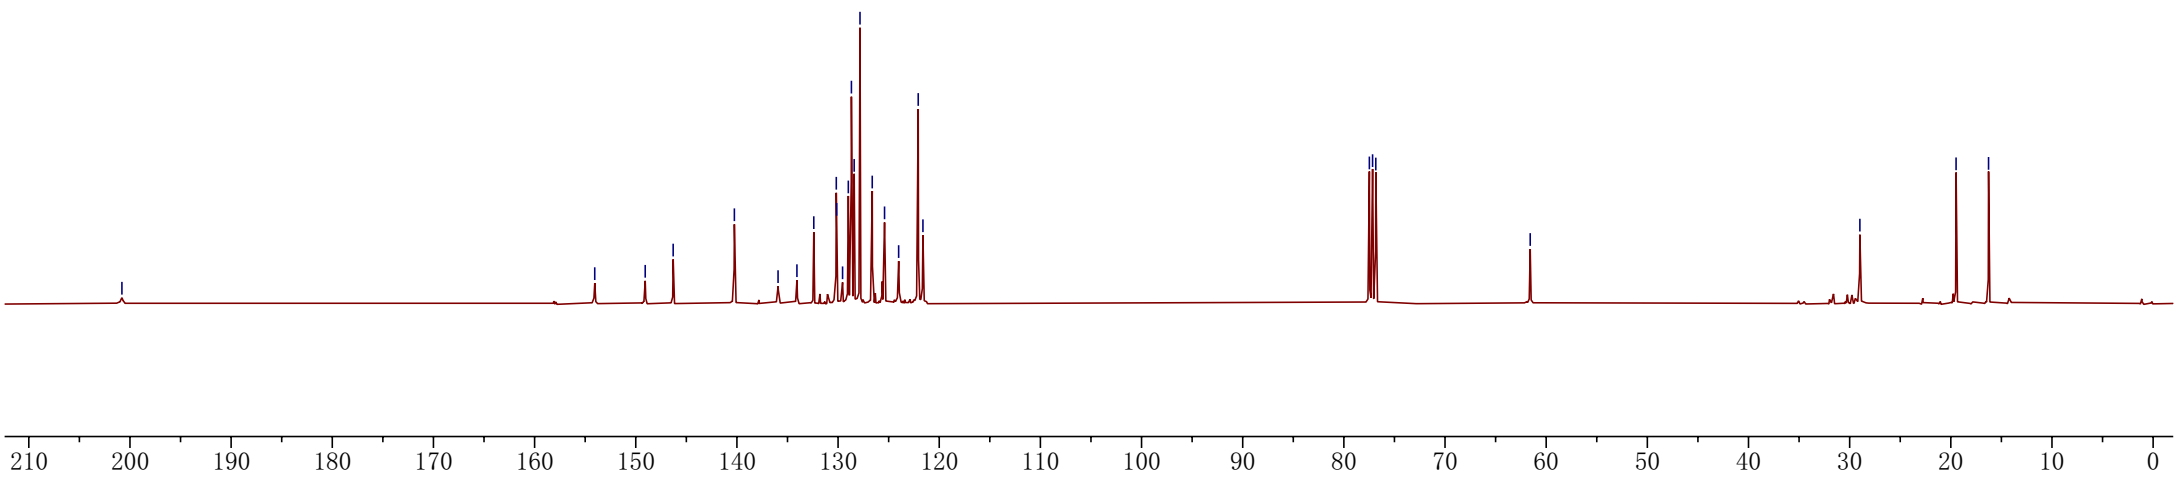

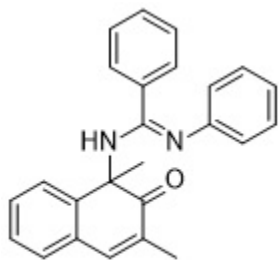

3ad

7.697  
7.678  
7.376  
7.368  
7.358  
7.348  
7.338  
7.328  
7.294  
7.275  
7.258  
7.228  
7.215  
6.900  
6.881  
6.862  
6.705  
6.686  
6.667  
6.188  
6.169

5.569

2.108

1.454

0.010

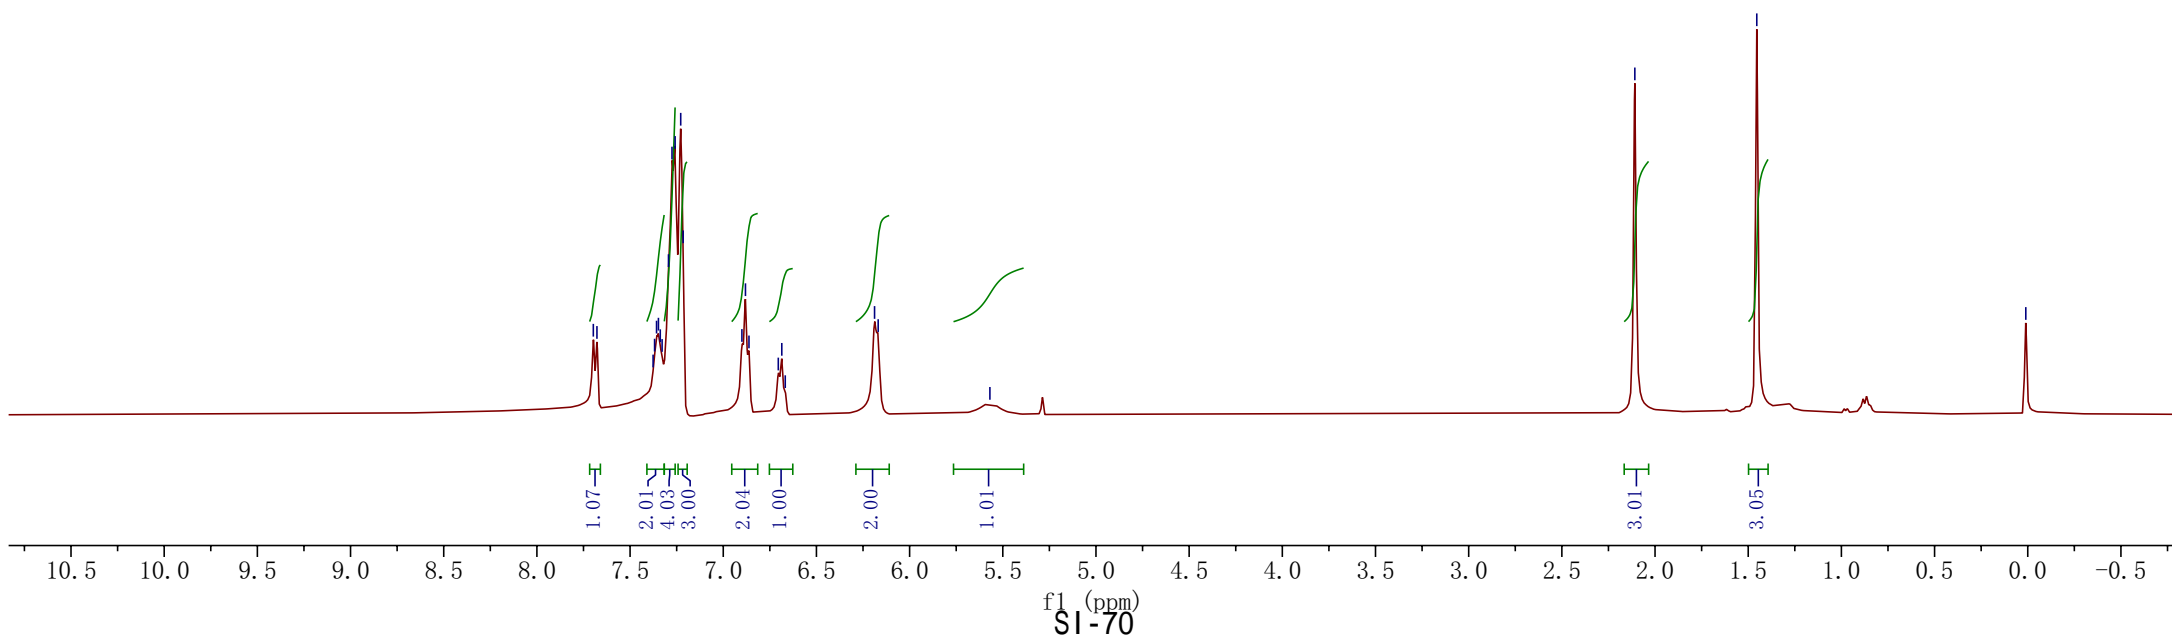

—200.706

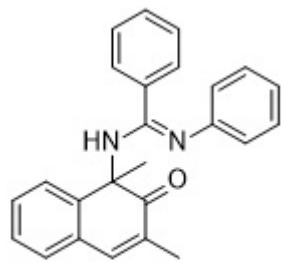

3ad

153.575  
149.490  
146.146

140.238  
133.827  
132.410  
130.131  
129.411  
128.738  
128.686  
128.448  
128.271  
128.075  
126.631  
123.852  
122.261  
121.427

77.477  
77.160  
76.842

—61.848

—29.060

—16.205

—0.129

—130.131

—129.411

128.738  
128.686

128.448  
128.271  
128.075

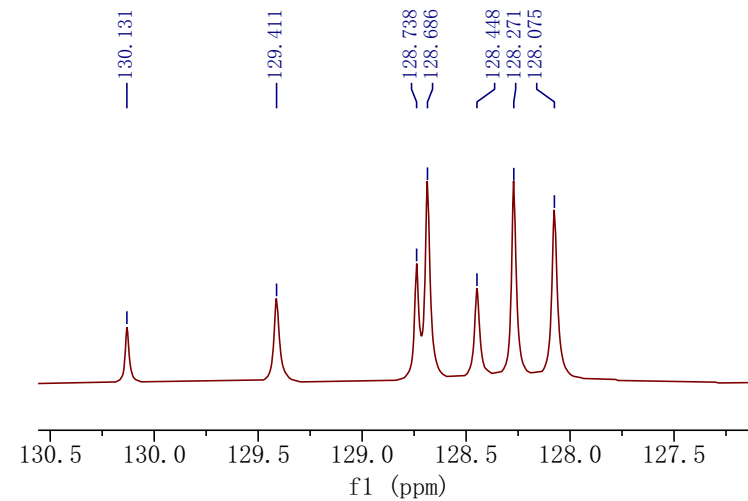

210 200 190 180 170 160 150 140 130 120 110 100 90 80 70 60 50 40 30 20 10 0

f1 (ppm)  
SI-71

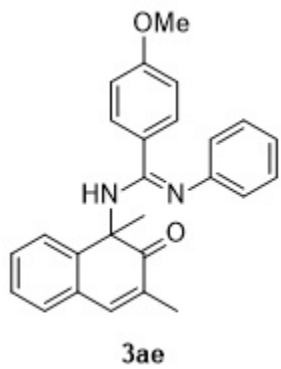

7.689  
7.670  
7.353  
7.343  
7.332  
7.321  
7.311  
7.260  
7.238  
7.218  
7.206  
7.194  
6.919  
6.900  
6.880  
6.747  
6.725  
6.701  
6.683  
6.205  
6.198  
6.180

3.748

2.088

1.442

0.004

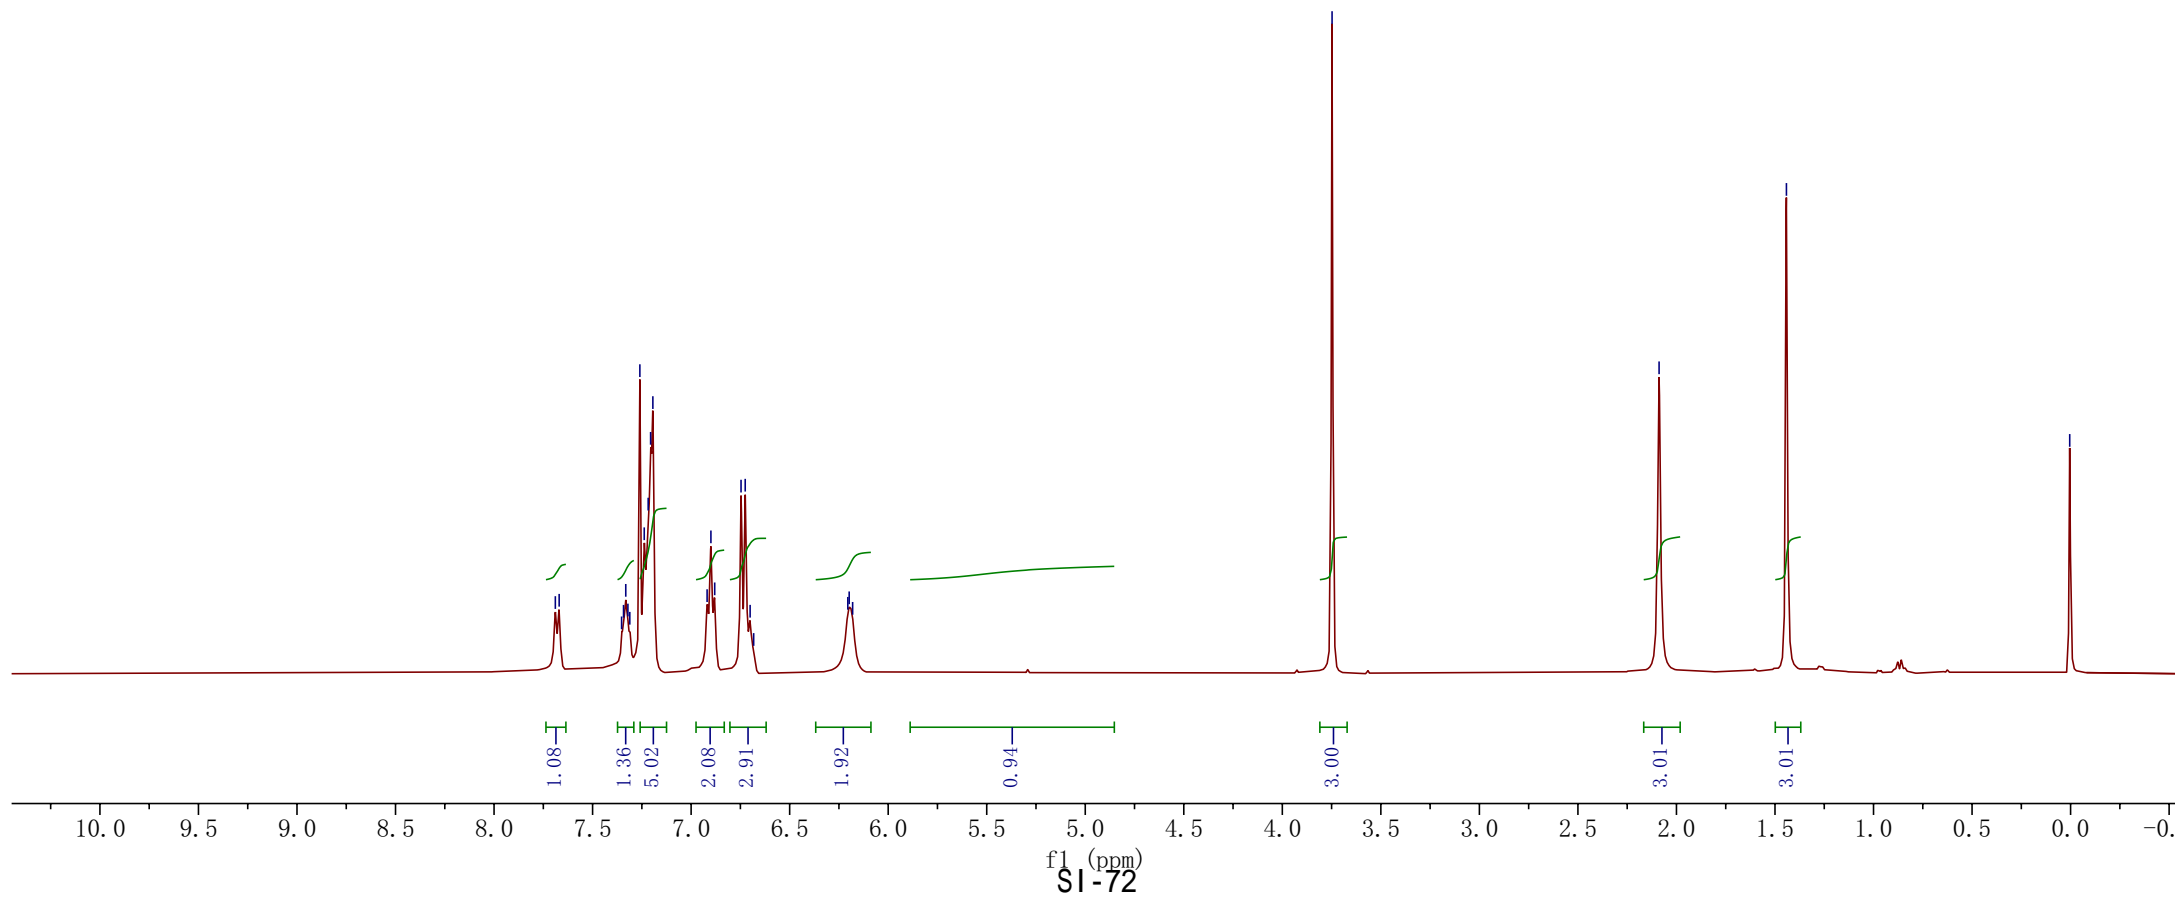



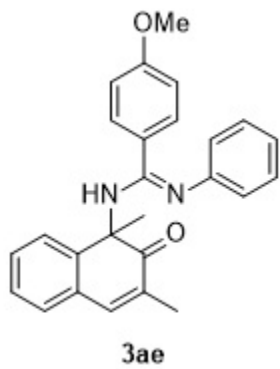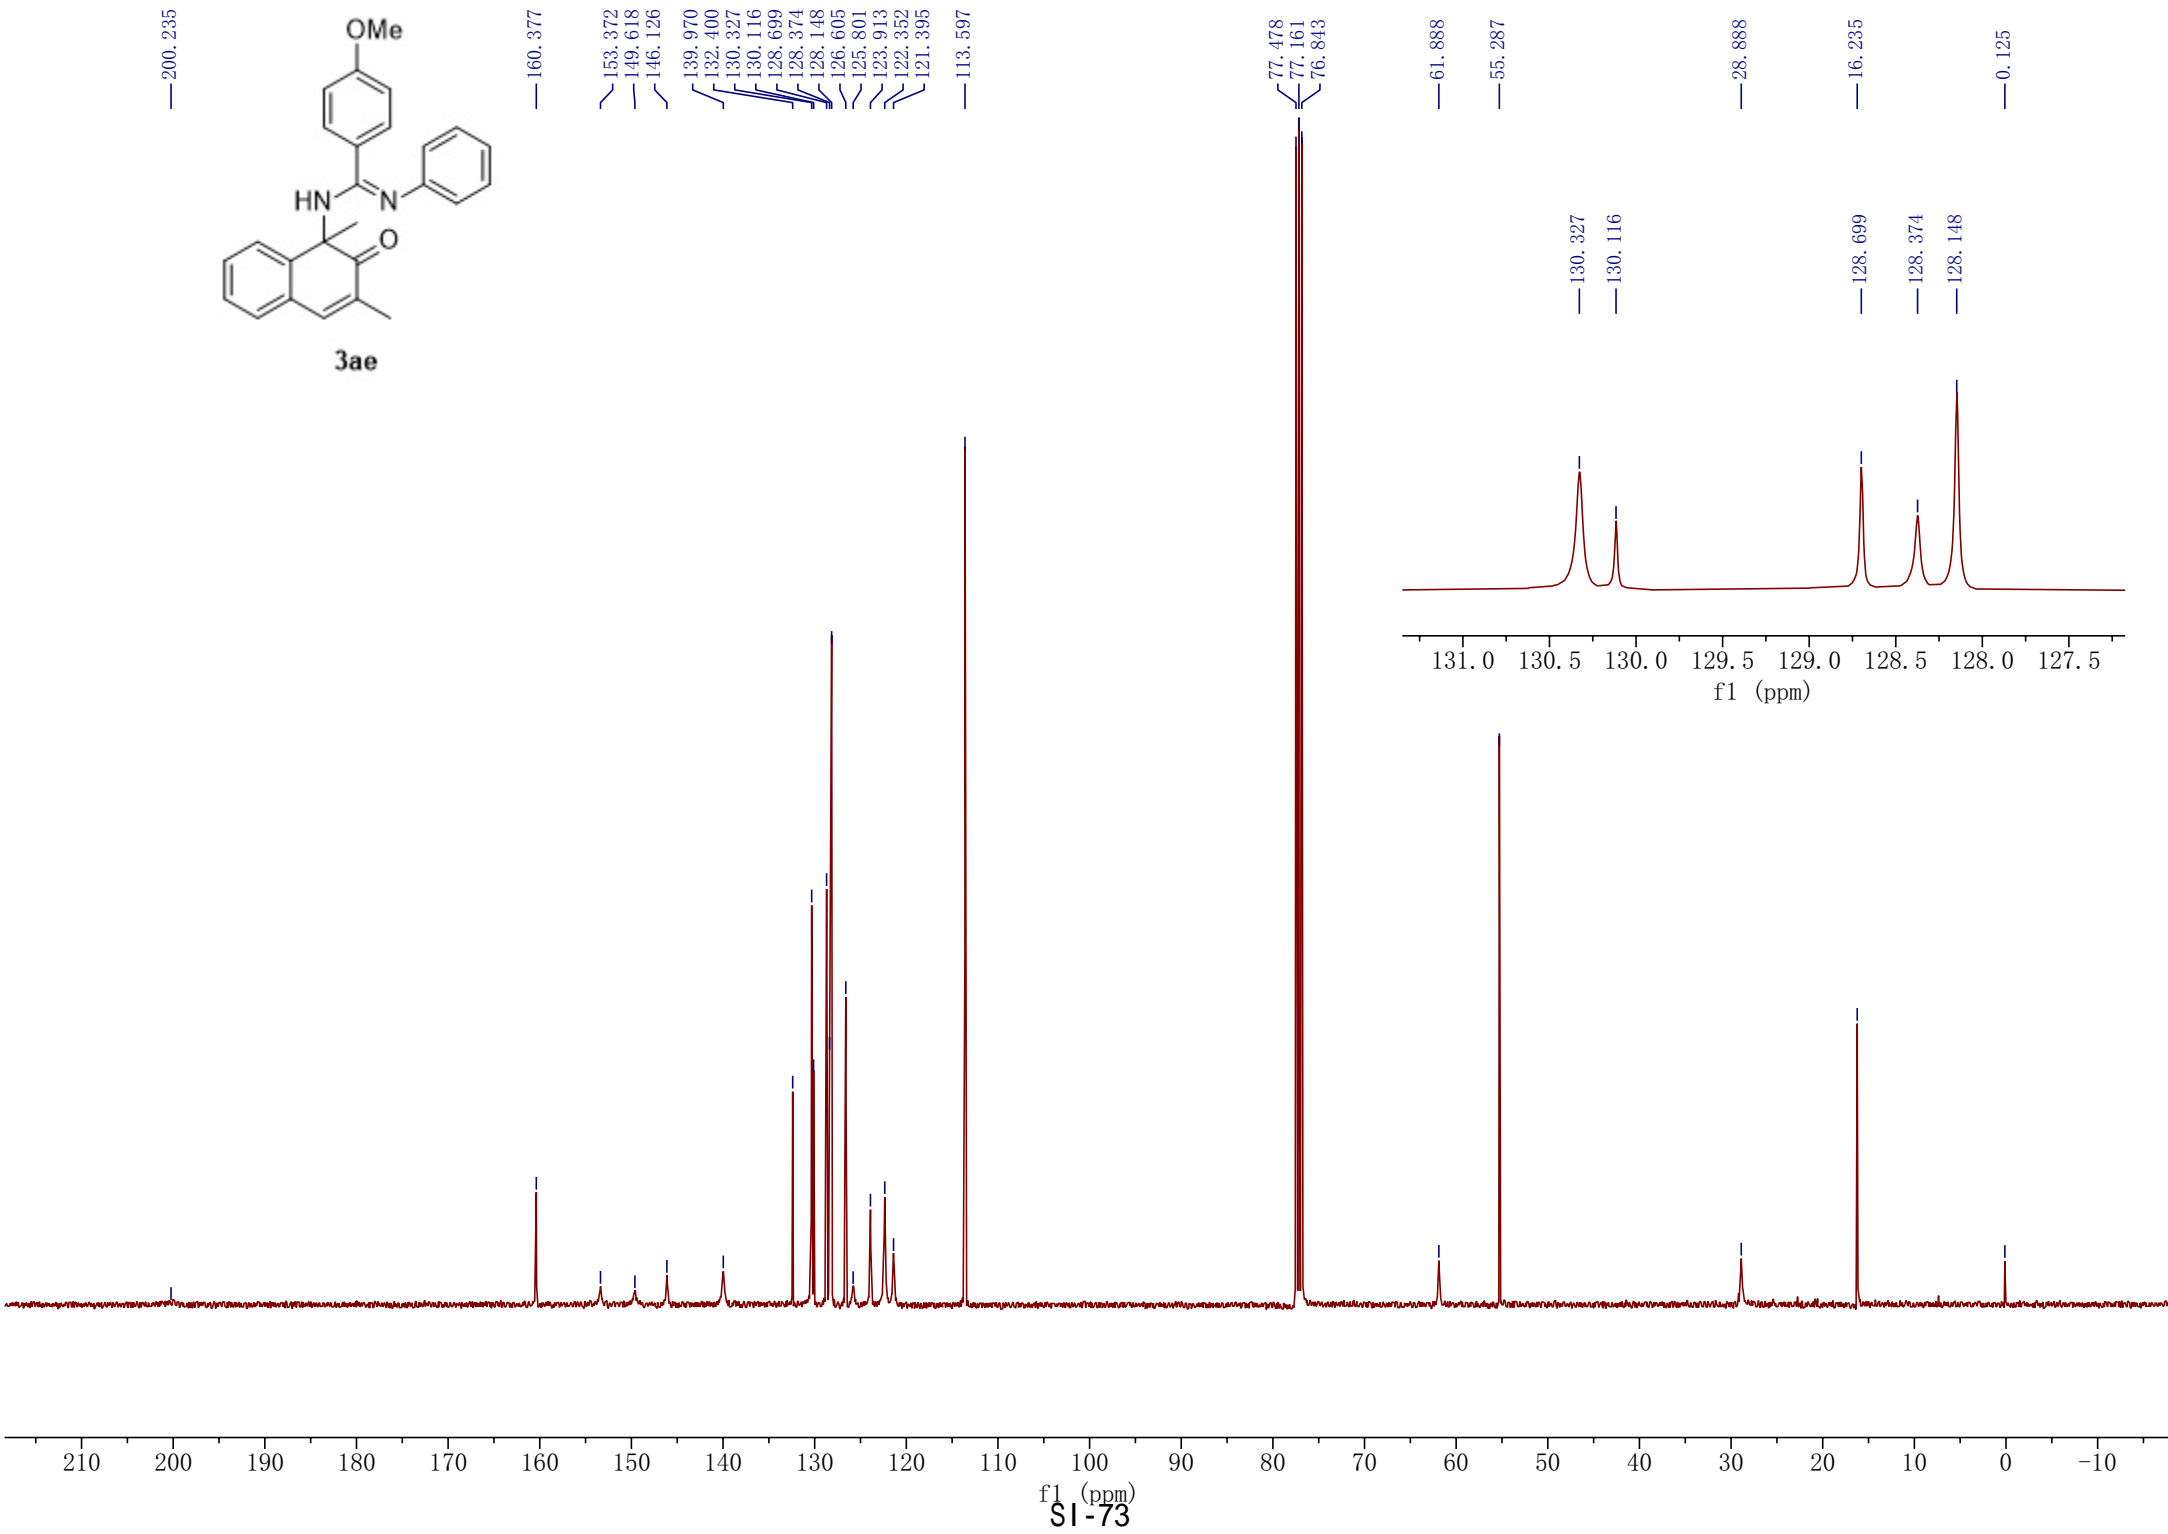

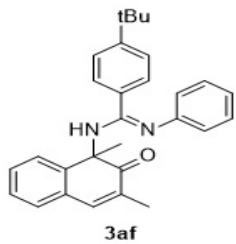

7.682  
7.662  
7.354  
7.343  
7.332  
7.322  
7.312  
7.261  
7.257  
7.238  
7.223  
7.214  
7.203  
6.910  
6.891  
6.872  
6.712  
6.693

6.198  
6.179

5.540

2.100

1.435

1.262

0.008  
0.004

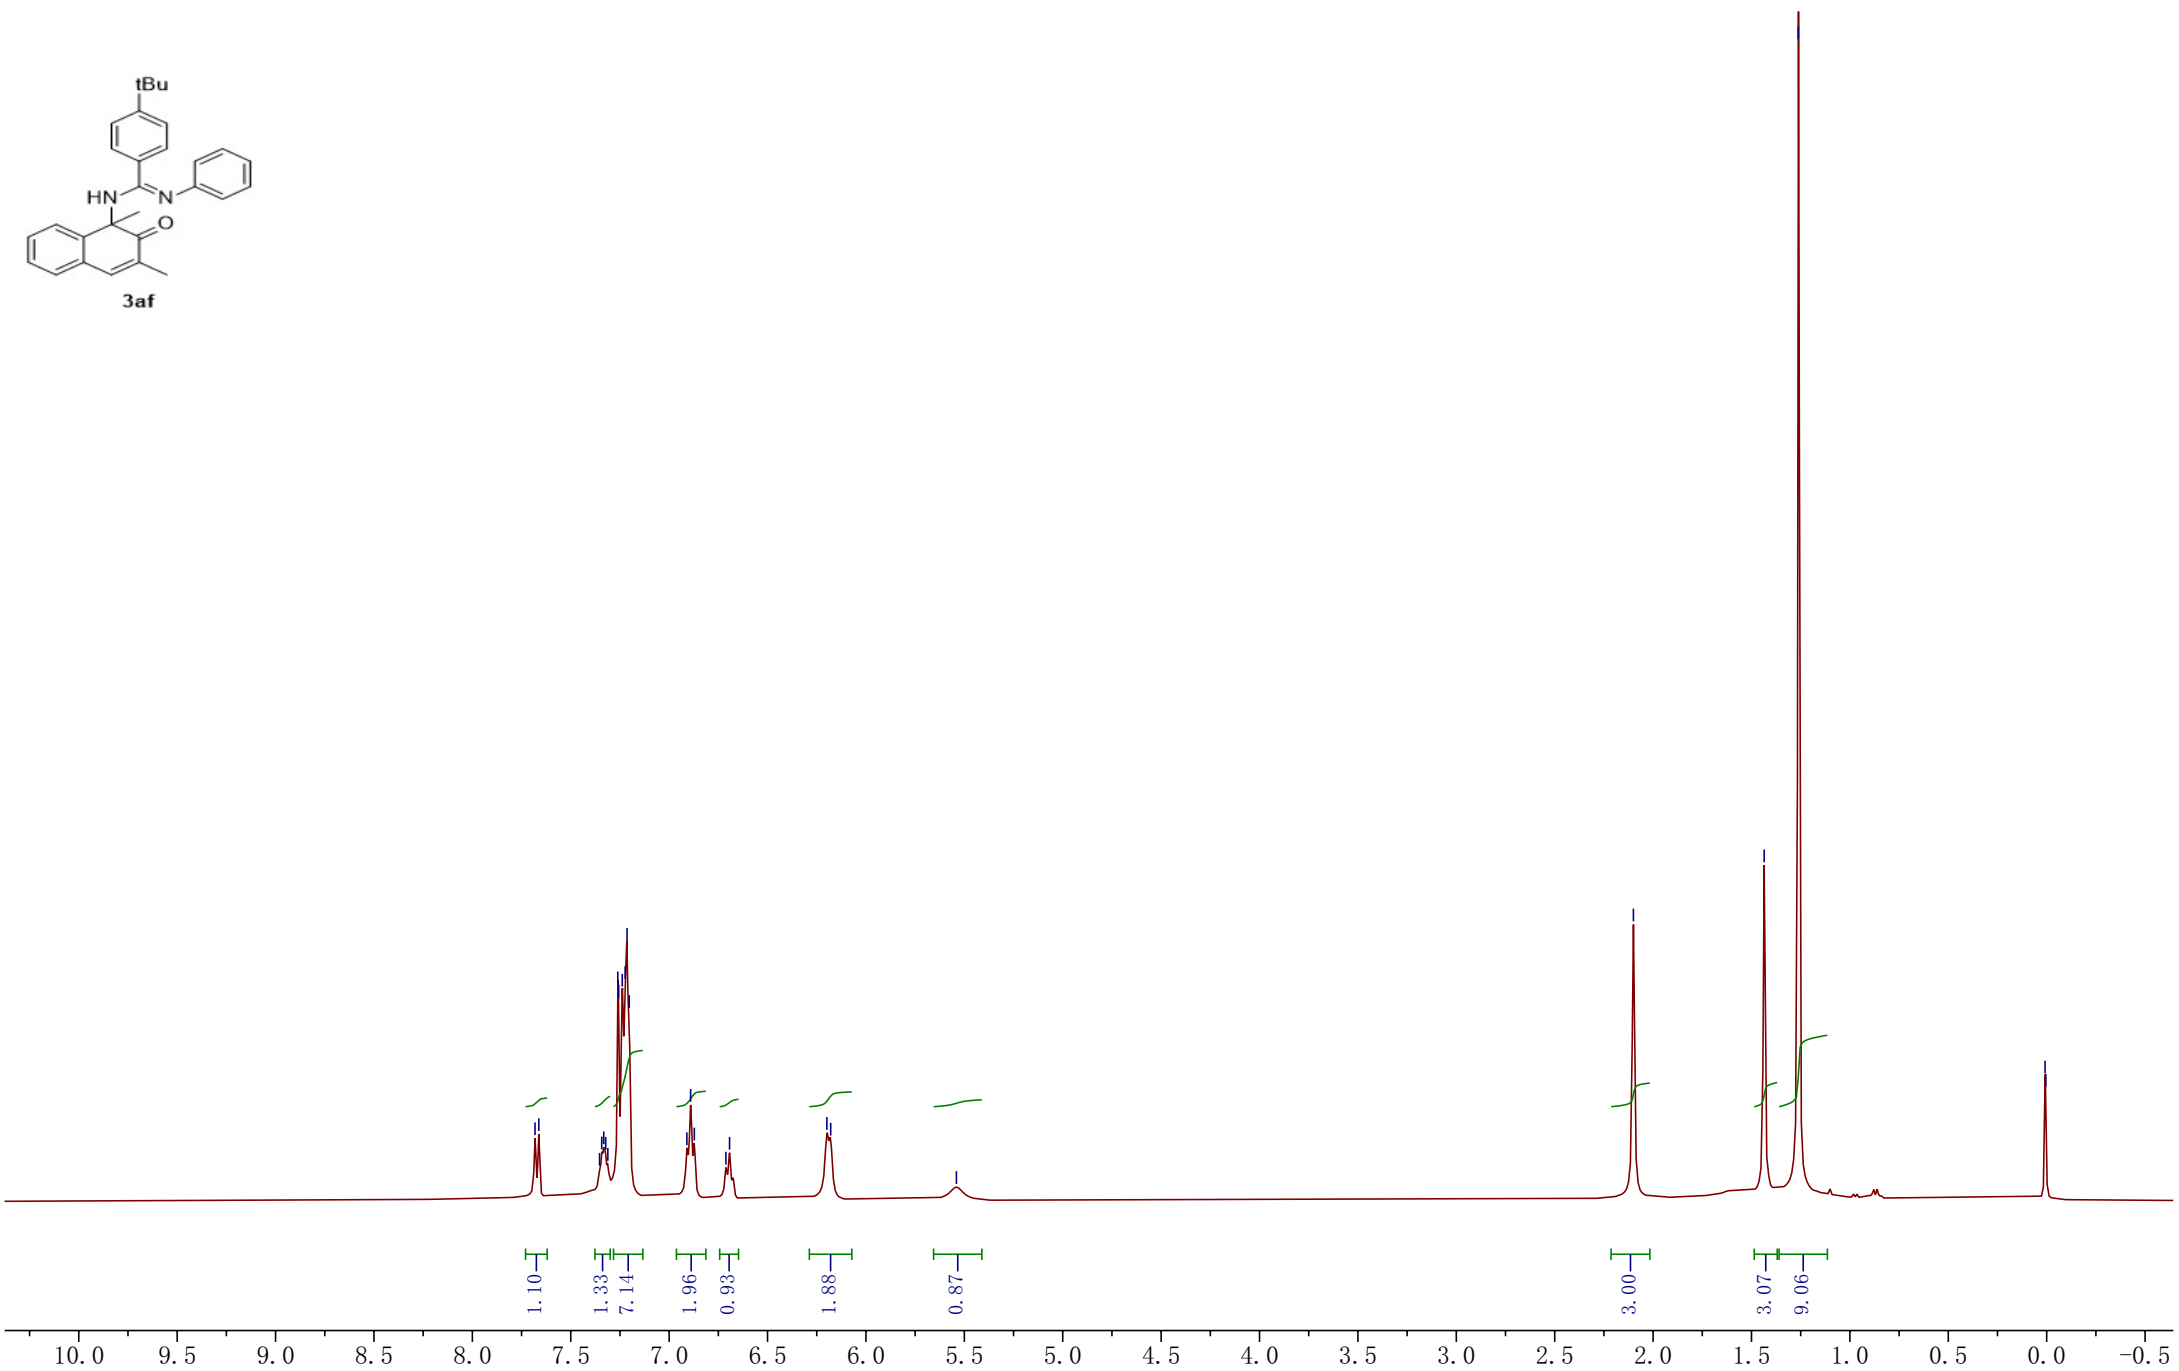

SI-74

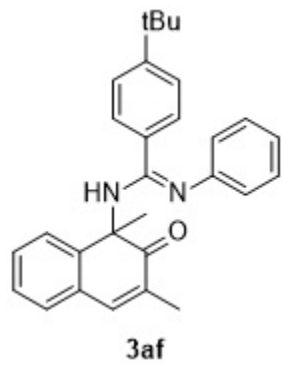

— 200.788

153.382  
152.606  
149.660  
146.275  
140.158  
132.460  
130.828  
130.182  
128.705  
128.478  
128.417  
128.095  
126.597  
125.199  
123.888  
122.245  
121.273

77.478  
77.160  
76.842

— 61.775

34.809  
31.292  
29.060

— 16.233

— 0.140

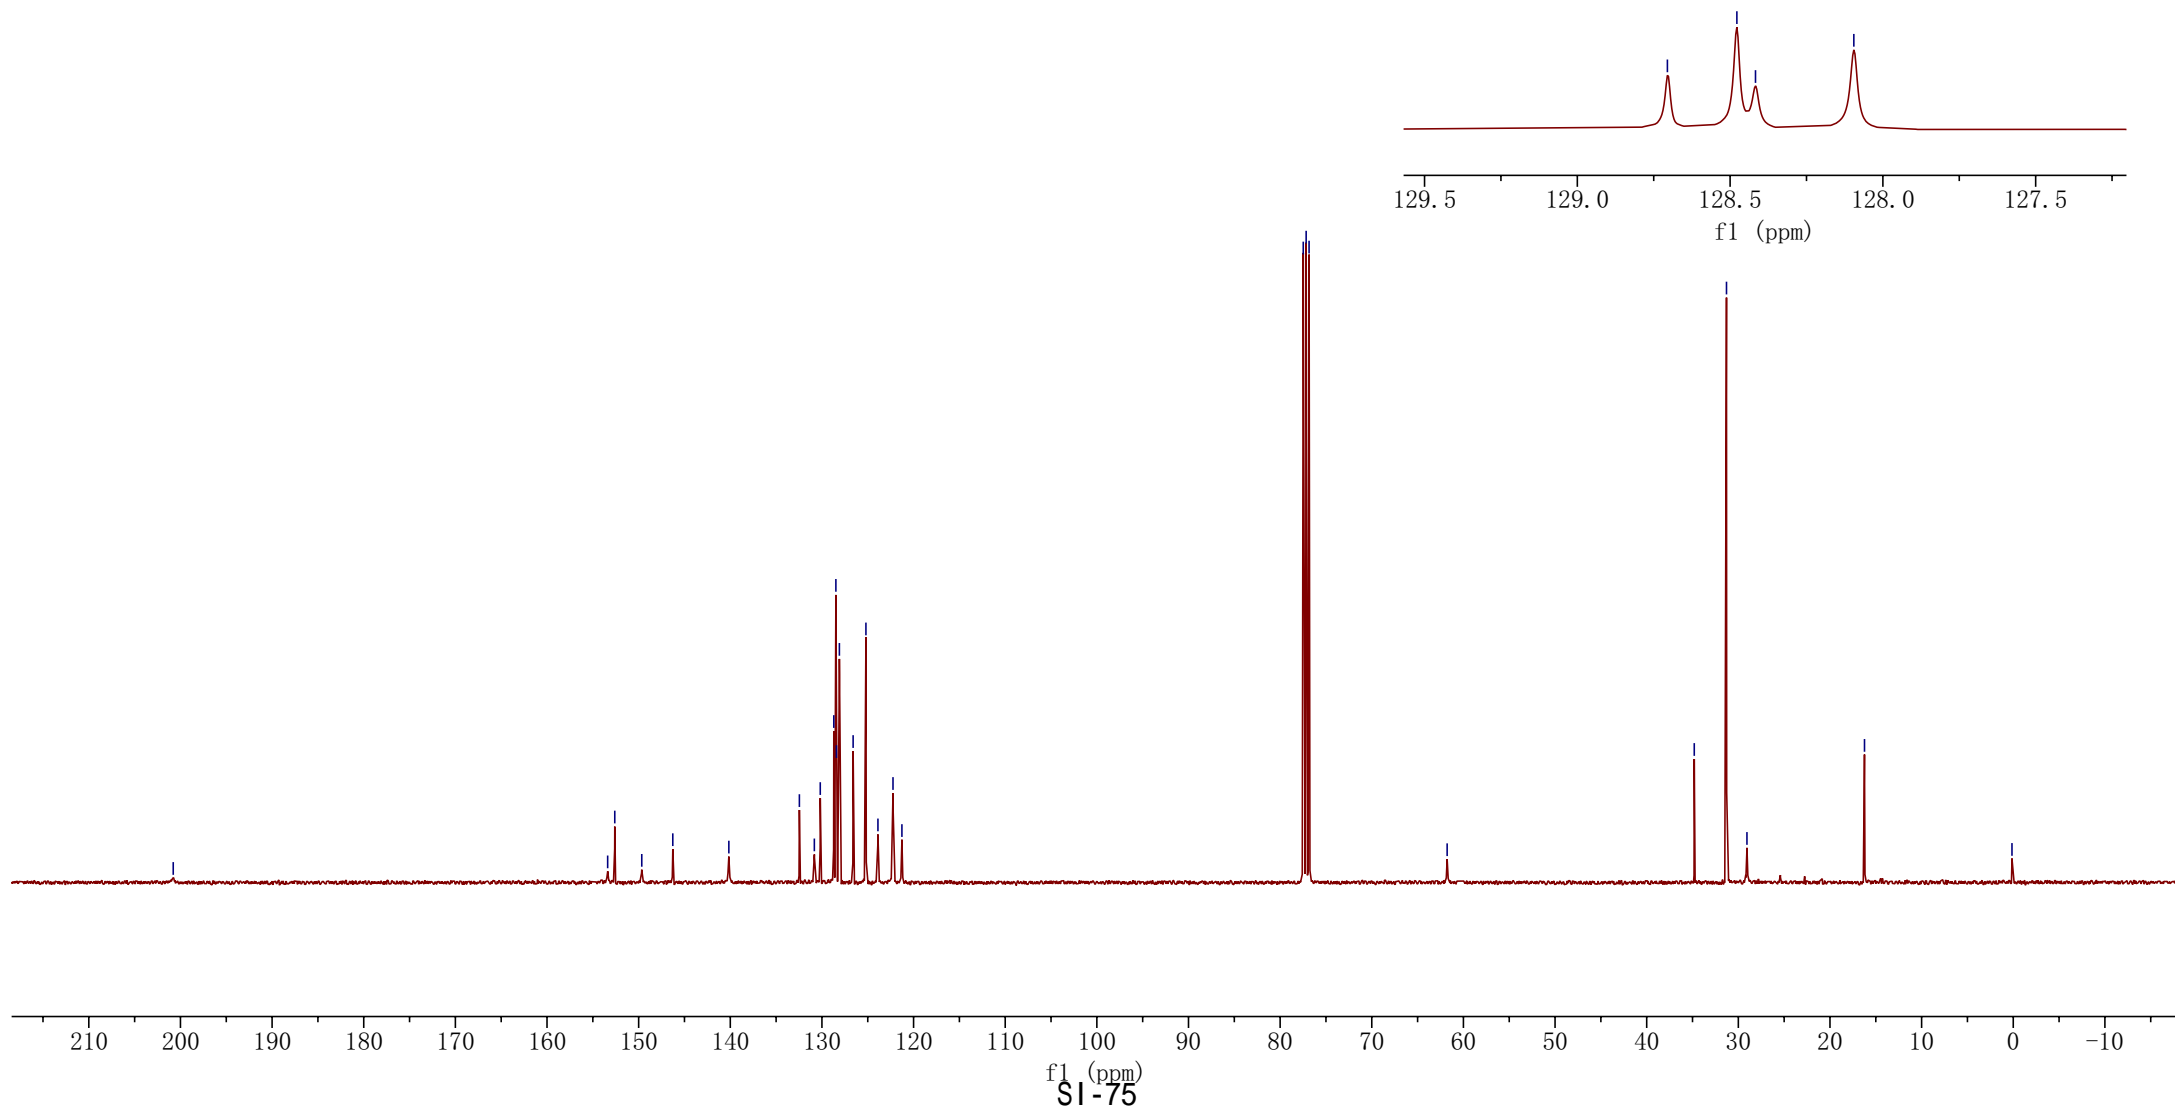

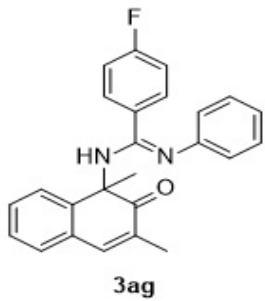

7.669  
7.650  
7.363  
7.352  
7.342  
7.331  
7.321  
7.284  
7.269  
7.260  
7.256  
7.245  
7.221  
7.209  
6.940  
6.918  
6.894  
6.872  
6.719  
6.700  
6.682  
6.165  
6.145

5.513

2.098

1.452

0.006  
0.001

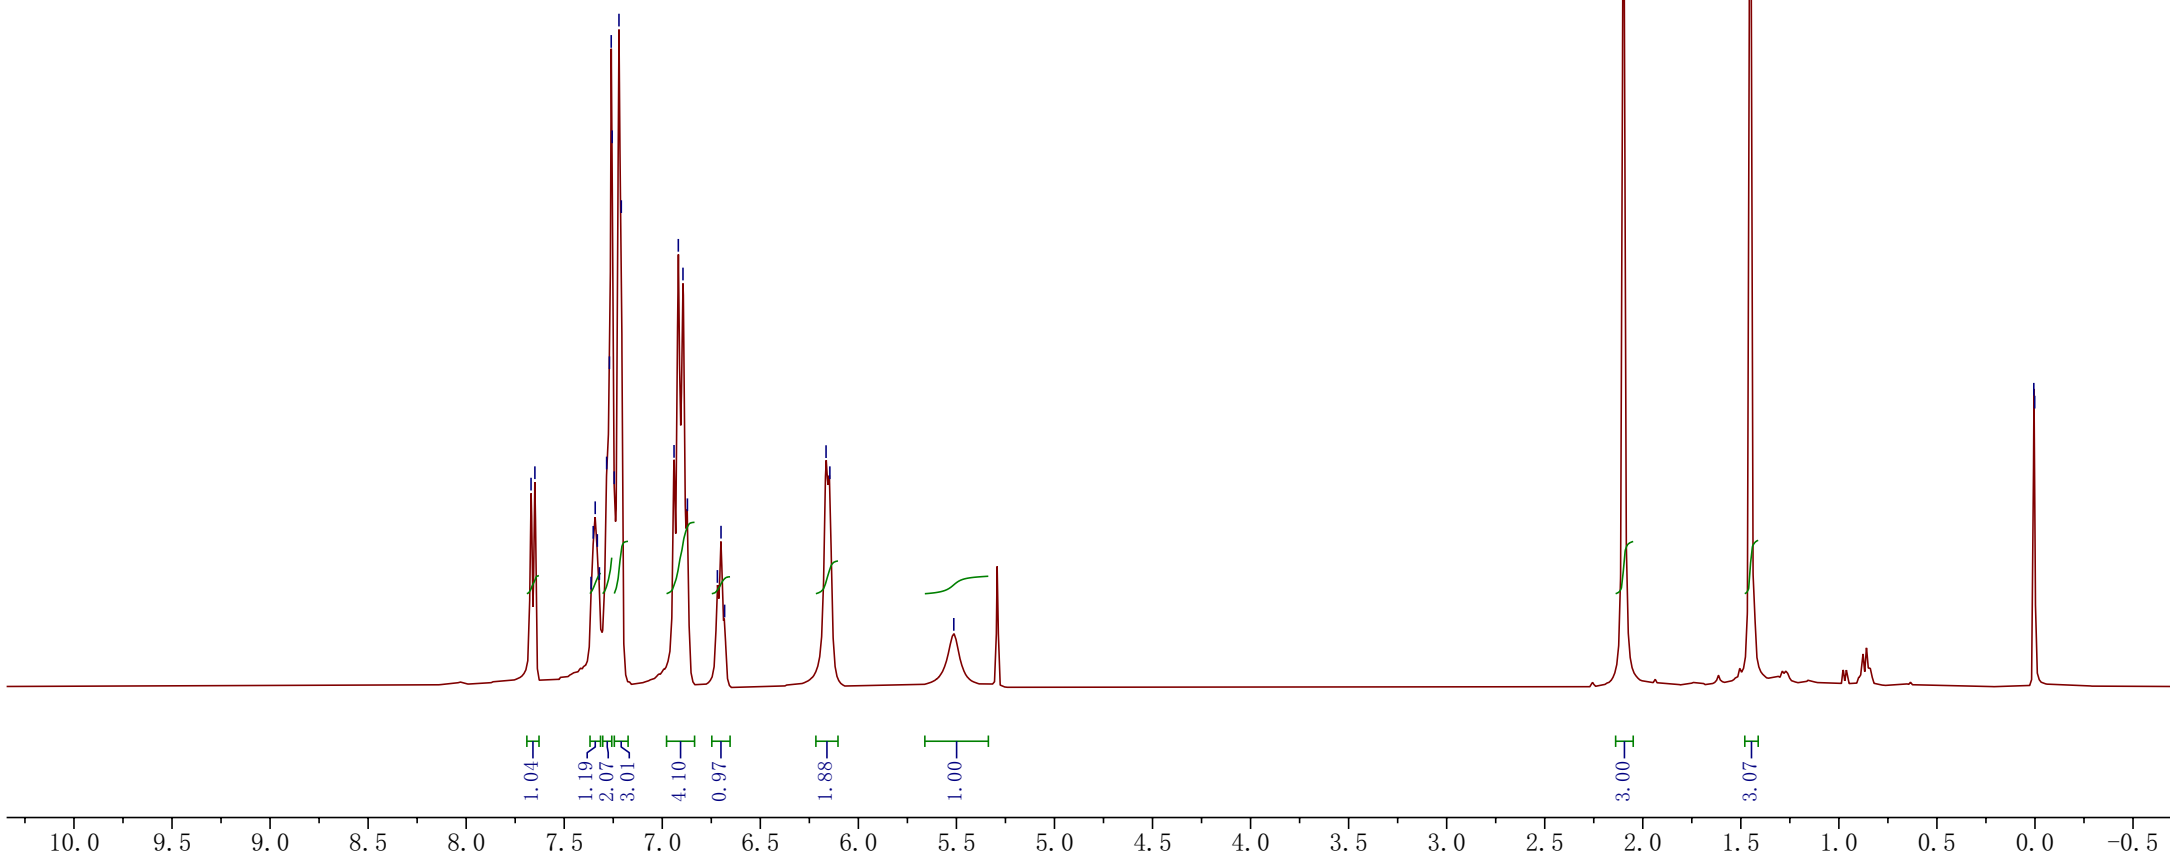

f1 (ppm)

SI-76

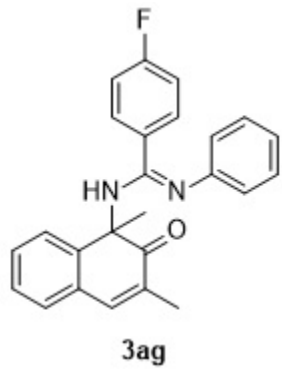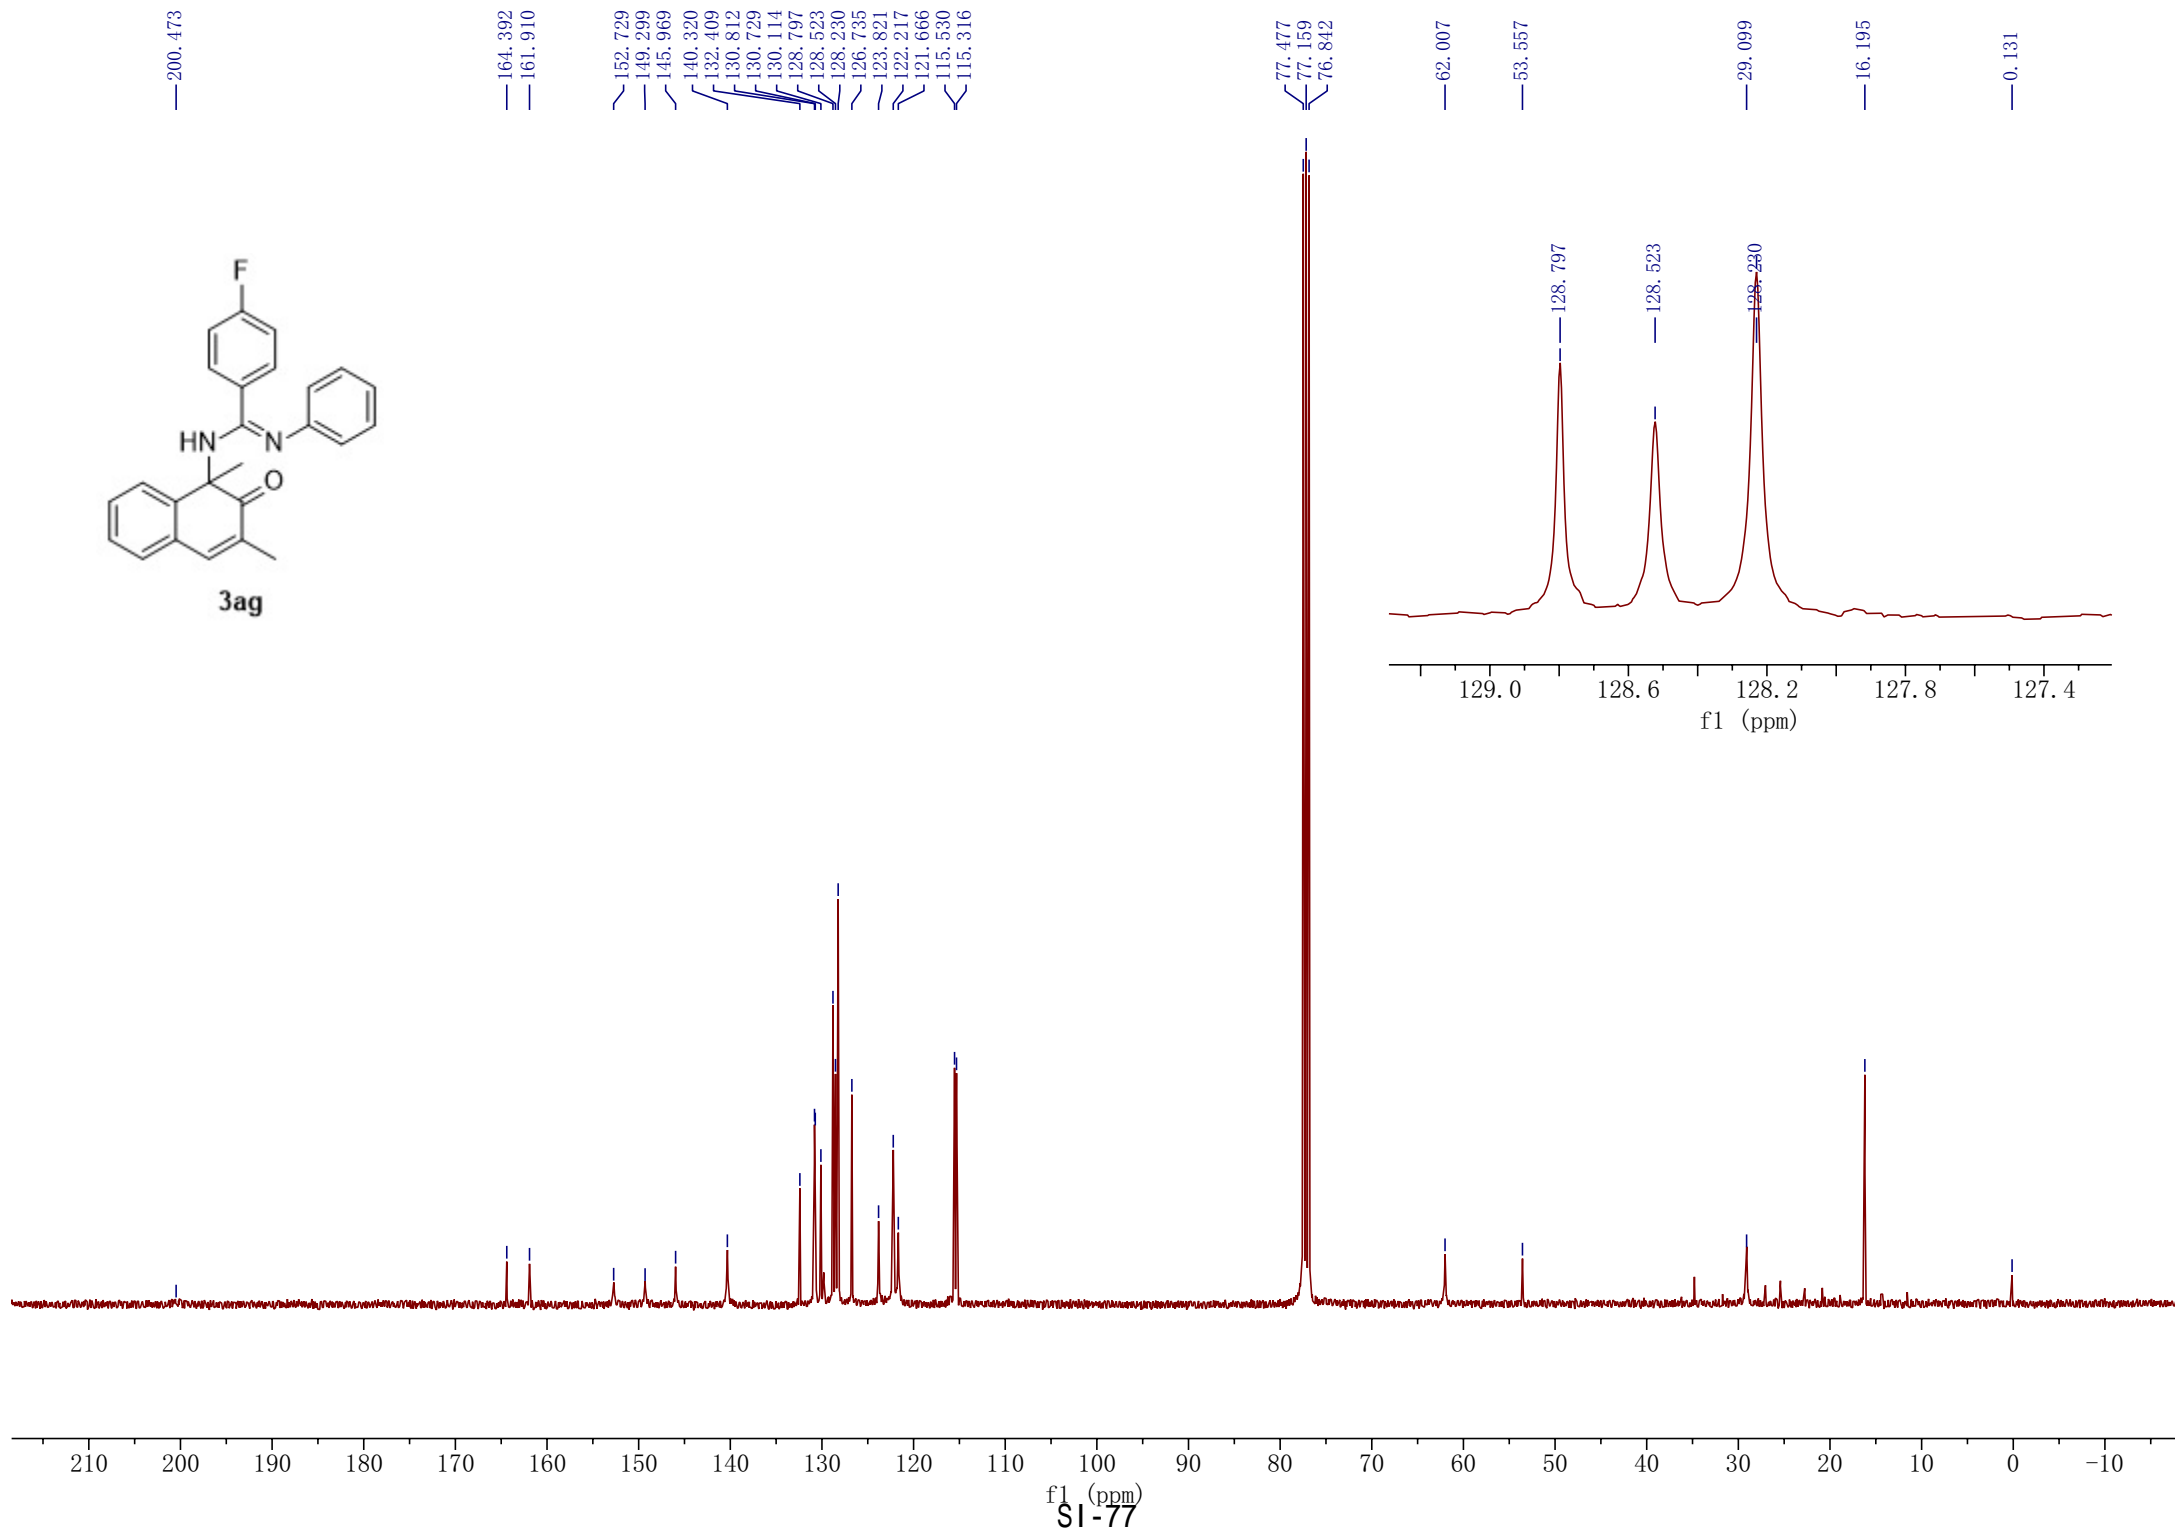

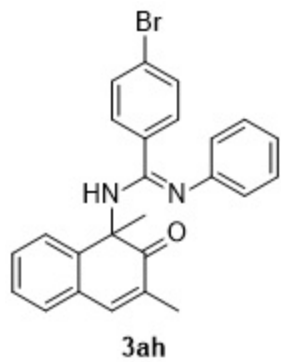

7.657  
7.638  
7.381  
7.360  
7.343  
7.333  
7.322  
7.260  
7.225  
7.213  
7.160  
7.140  
6.915  
6.896  
6.877  
6.727  
6.709  
6.690  
6.163  
6.143

5.514

2.096

1.451

0.007

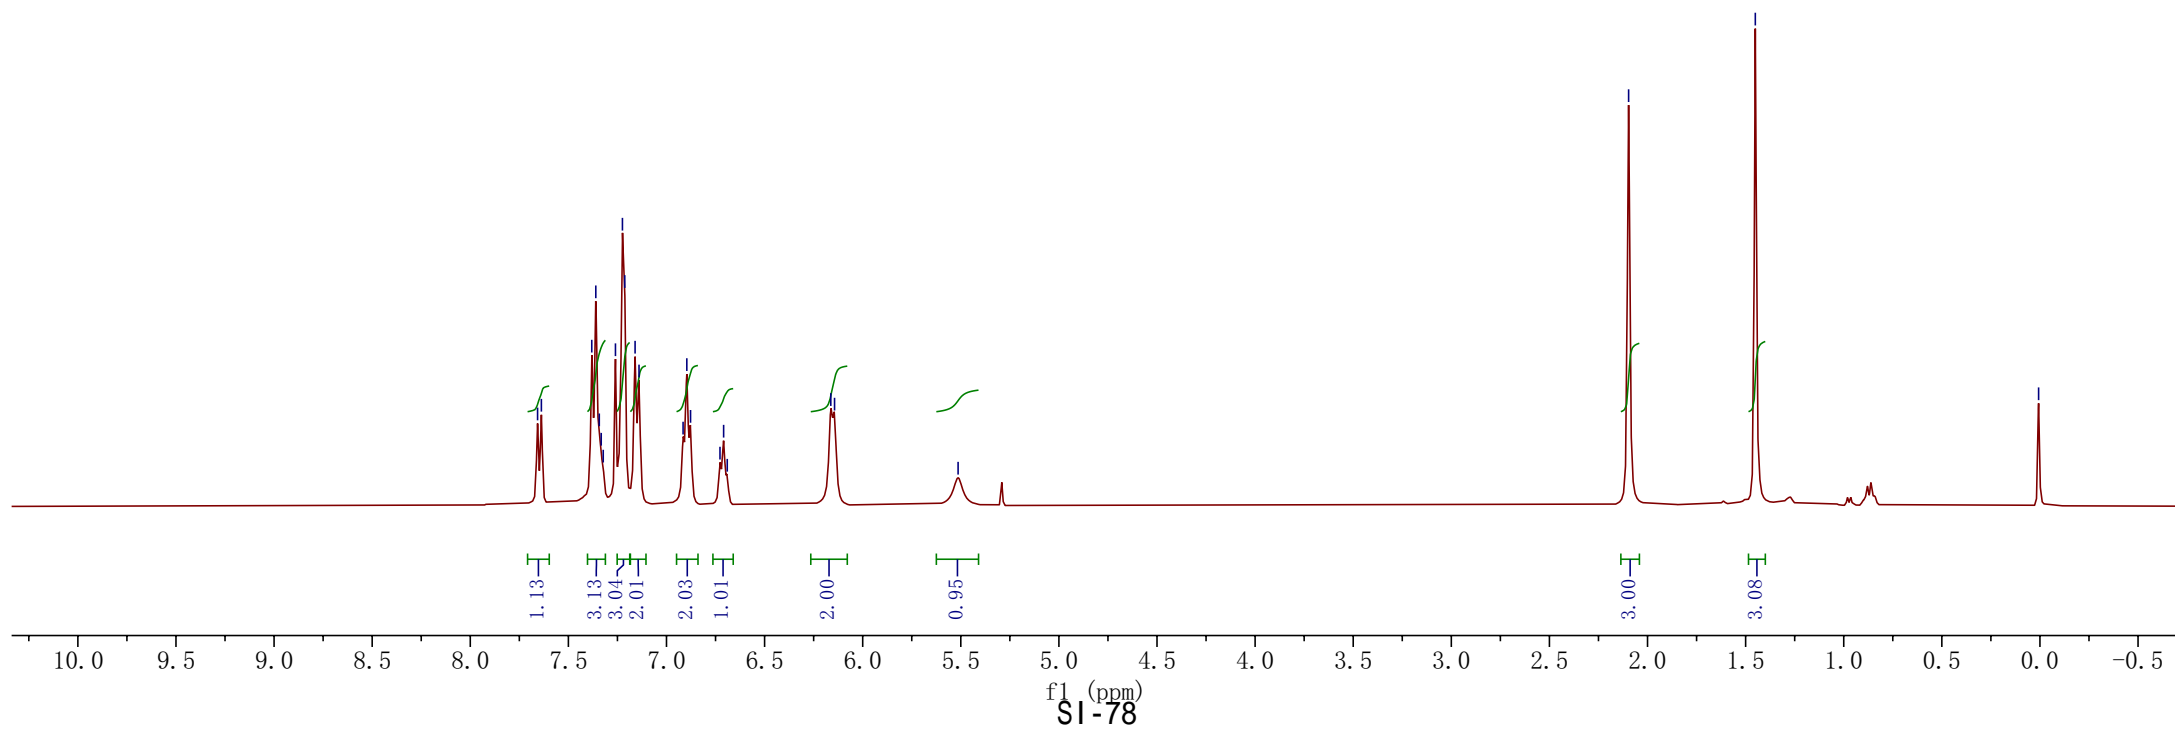

— 200.737

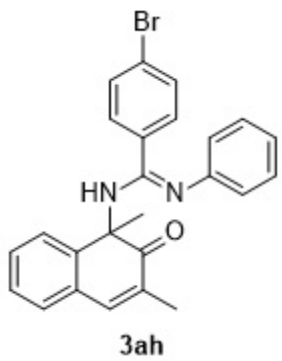

152.613  
149.135  
145.893  
140.398  
132.657  
132.400  
131.569  
130.342  
130.101  
128.815  
128.544  
128.270  
126.748  
123.798  
122.142  
121.752

77.478  
77.160  
76.842

62.008

29.102

16.173

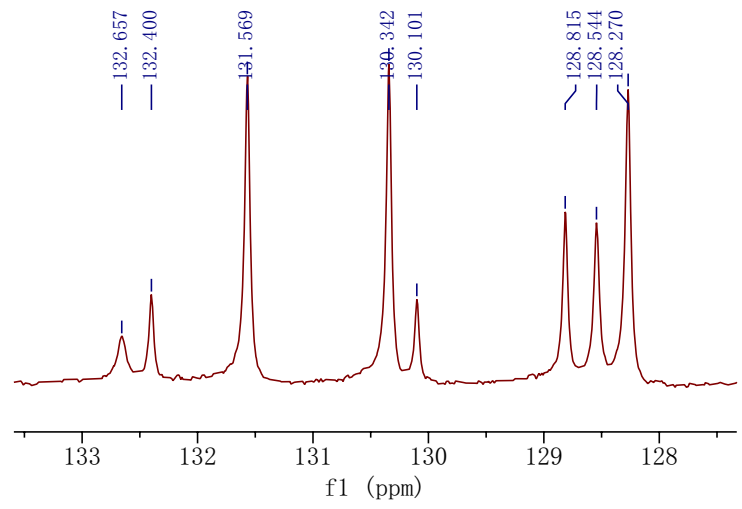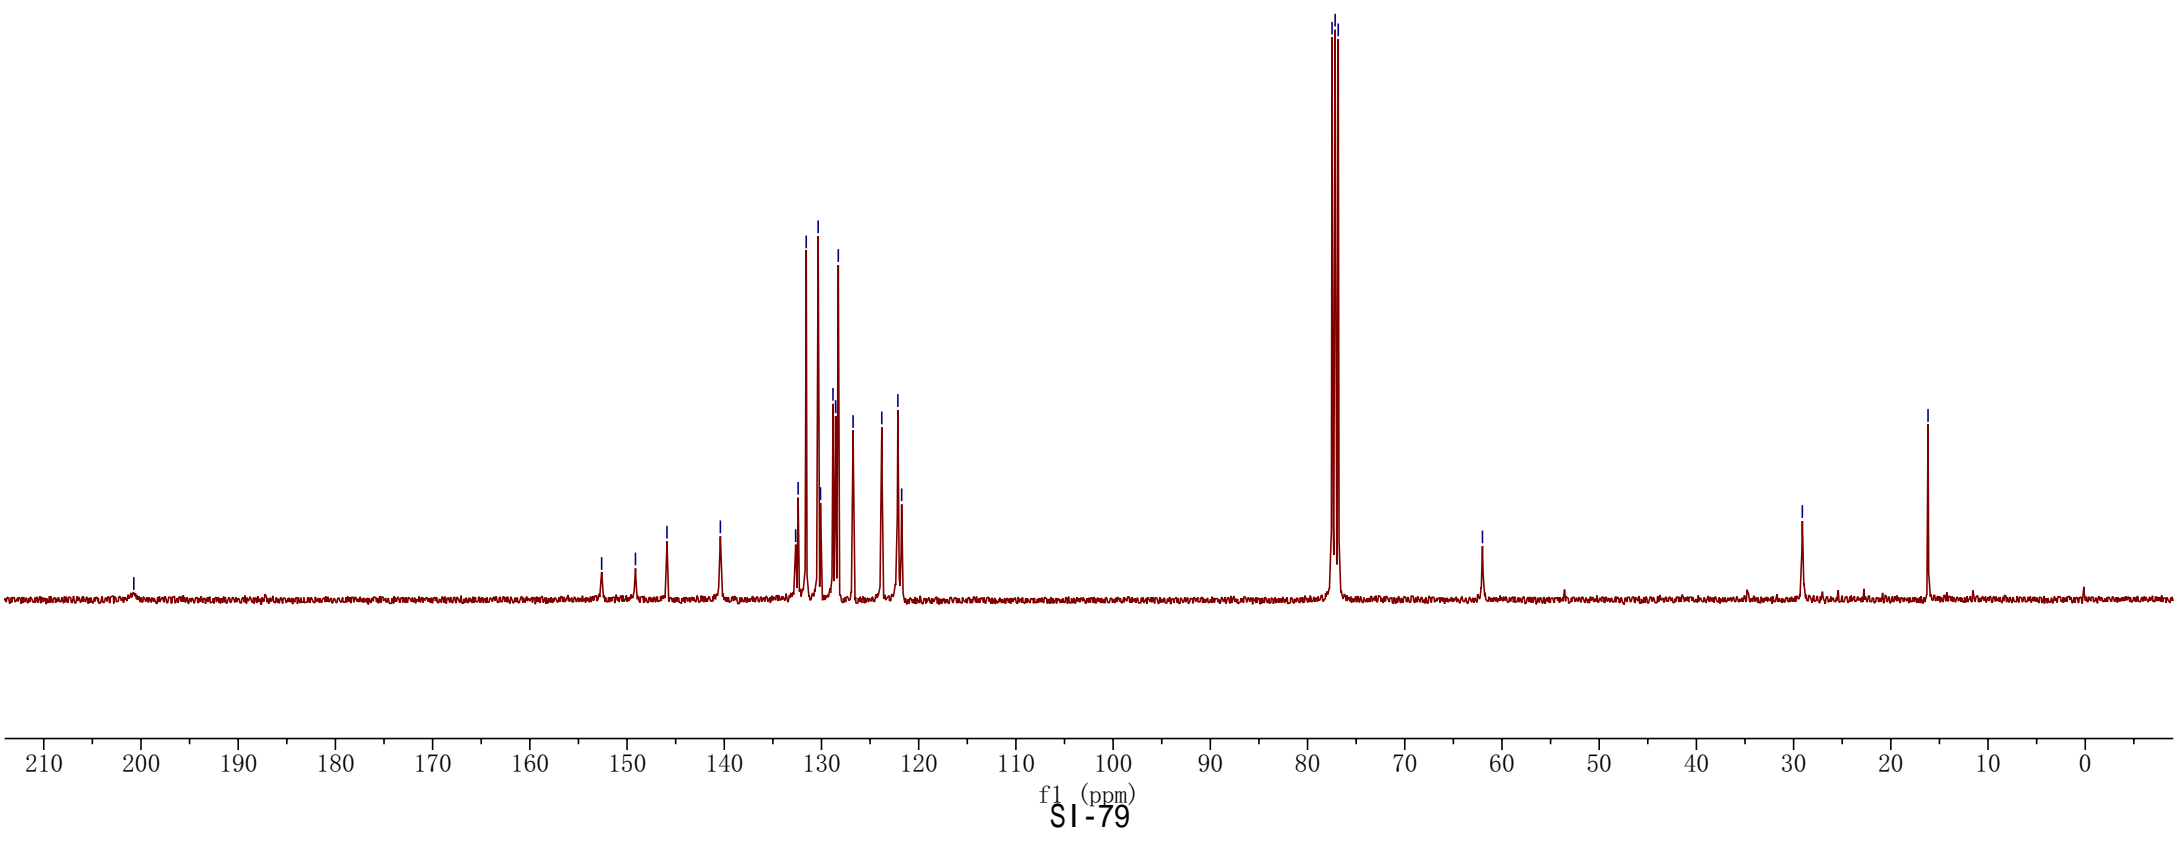

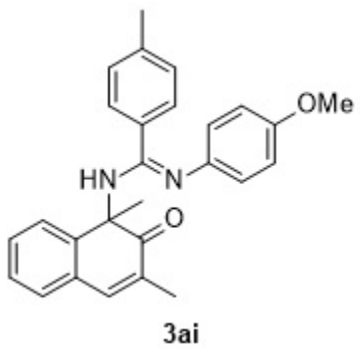

7.691  
7.672  
7.346  
7.335  
7.325  
7.315  
7.305  
7.290  
7.260  
7.228  
7.209  
7.195  
7.170  
7.050  
7.031  
6.473  
6.452  
6.144  
6.135  
5.291  
3.613  
2.290  
2.069  
1.425  
0.003  
-0.008

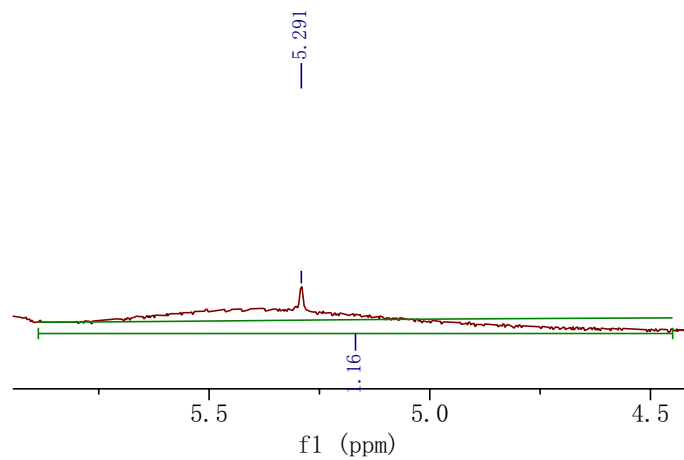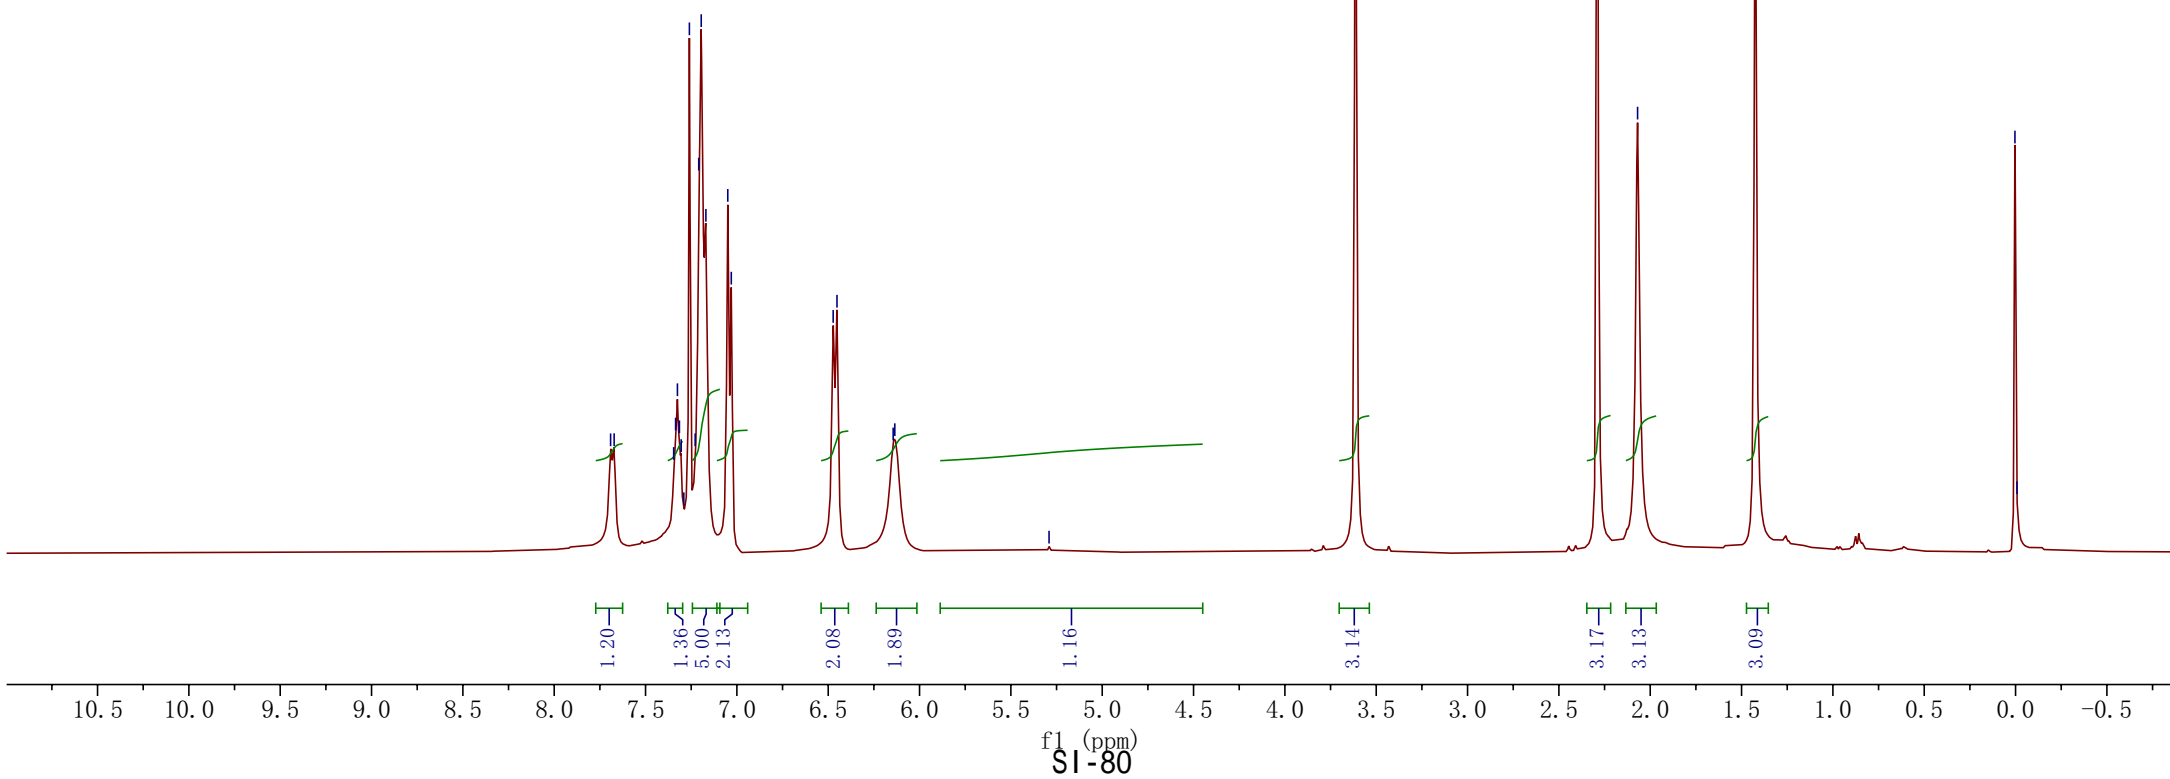



199.382

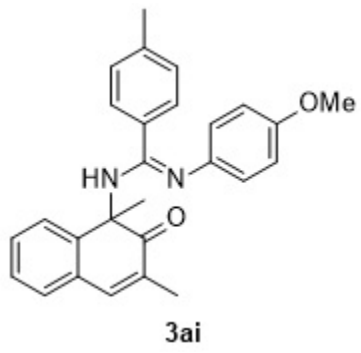

154.713  
153.965

146.070  
142.476  
139.442  
132.422  
130.739  
130.108  
128.952  
128.708  
128.657  
128.216  
126.573  
124.060  
123.317

113.489

77.478  
77.160  
76.842

62.139  
55.314

28.590  
21.439  
16.341

0.116

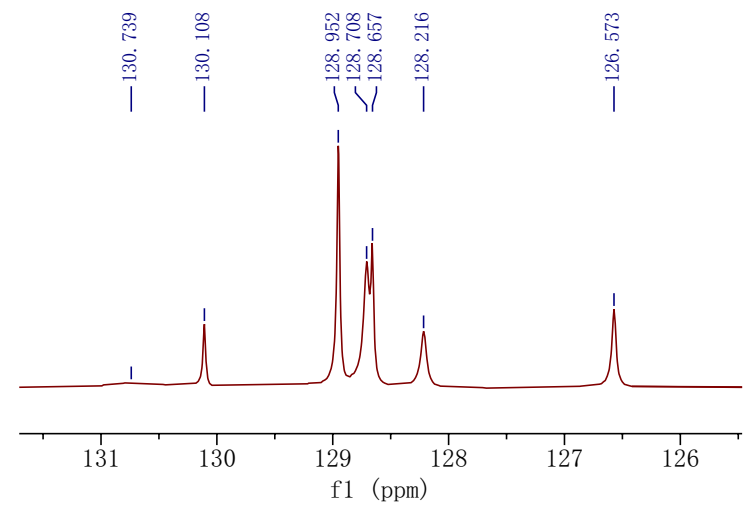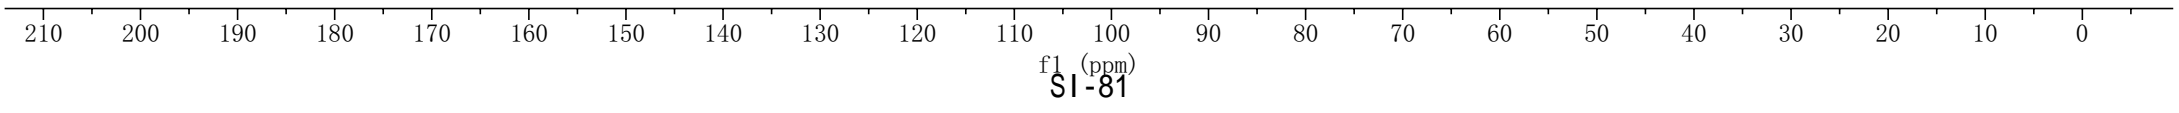

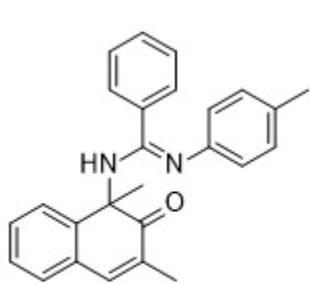

3aj

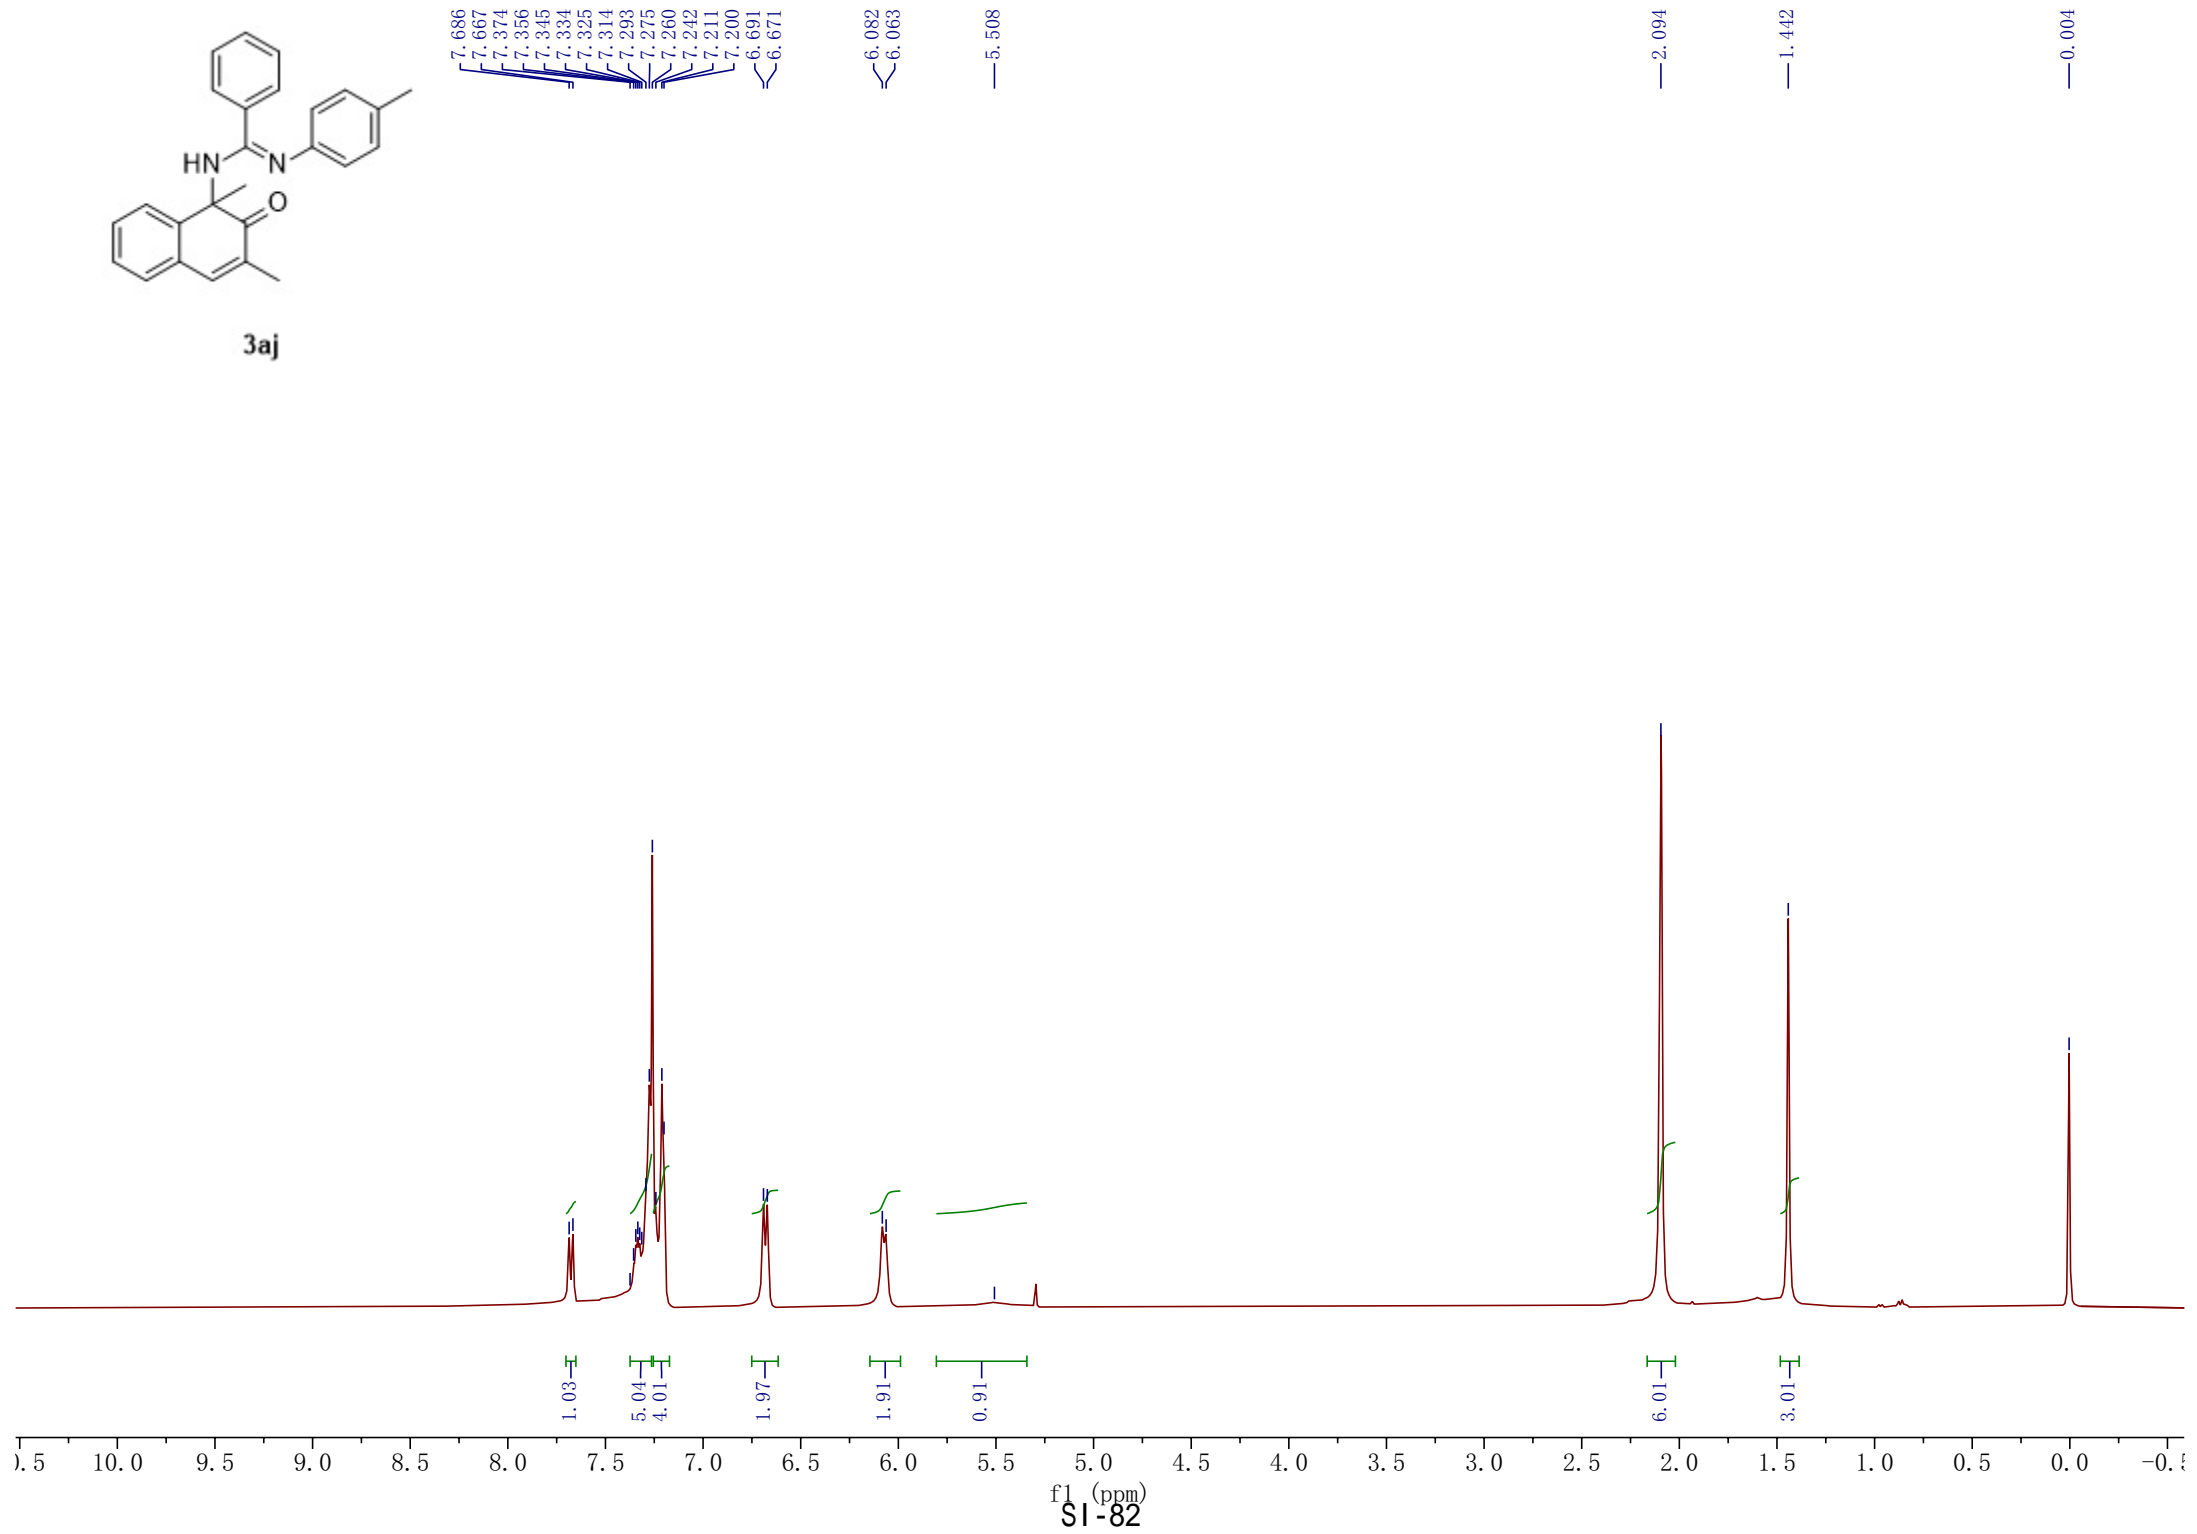

— 200.600

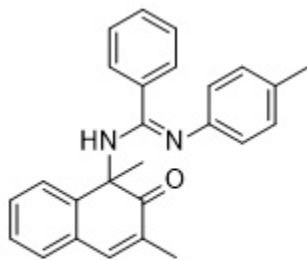

**3aj**

— 153.448

— 146.709

— 146.202

— 140.081

— 133.959

— 132.461

— 130.705

— 130.164

— 129.366

— 128.741

— 128.710

— 128.420

— 128.288

— 126.598

— 123.887

— 122.103

— 77.477

— 77.160

— 76.842

— 61.867

— 28.965

— 20.775

— 16.251

— 0.136

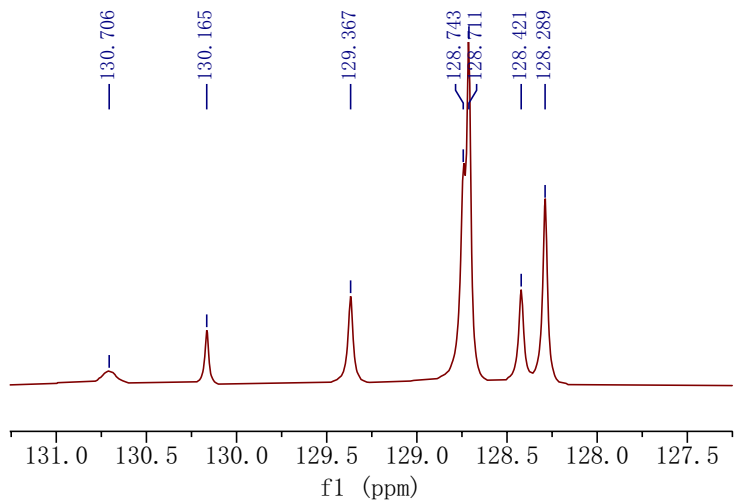

210 200 190 180 170 160 150 140 130 120 110 100 90 80 70 60 50 40 30 20 10 0 -10

f1 (ppm)  
SI-83

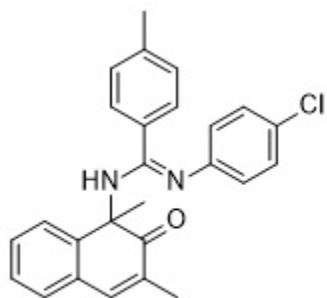

3ak

7.648  
7.629  
7.355  
7.344  
7.334  
7.324  
7.313  
7.302  
7.260  
7.234  
7.226  
7.214  
7.163  
7.144  
7.068  
7.048  
6.832  
6.812  
6.085  
6.065

5.579

2.304

2.093

1.444

0.007

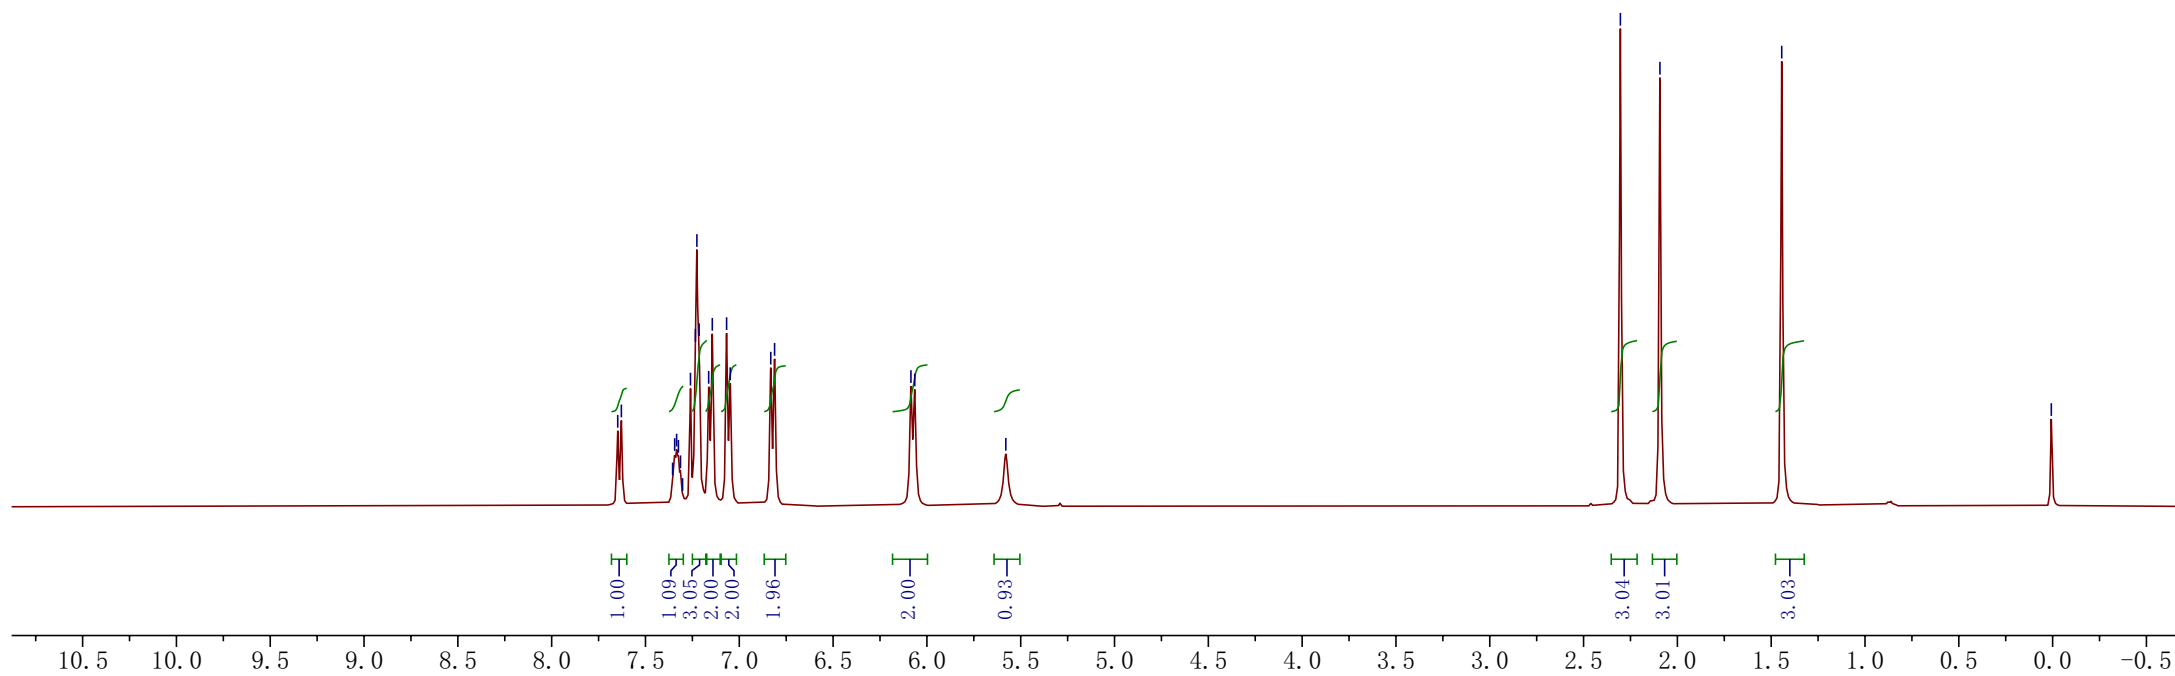

f1 (ppm)

SI-84

— 200.619

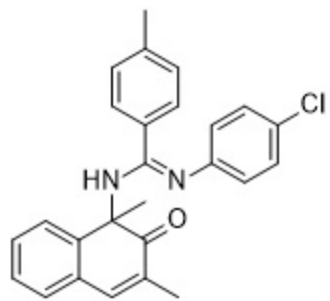

**3ak**

— 154.100

— 148.322

— 146.068

— 140.226

— 139.720

— 132.368

— 130.432

— 130.068

— 129.077

— 128.750

— 128.565

— 128.415

— 128.105

— 126.647

— 126.296

— 123.747

— 123.370

— 77.478

— 77.160

— 76.842

— 61.780

— 28.954

— 21.417

— 16.142

— 130.432

— 130.068

— 129.077

— 128.750

— 128.565

— 128.415

— 128.105

— 126.647

— 126.296

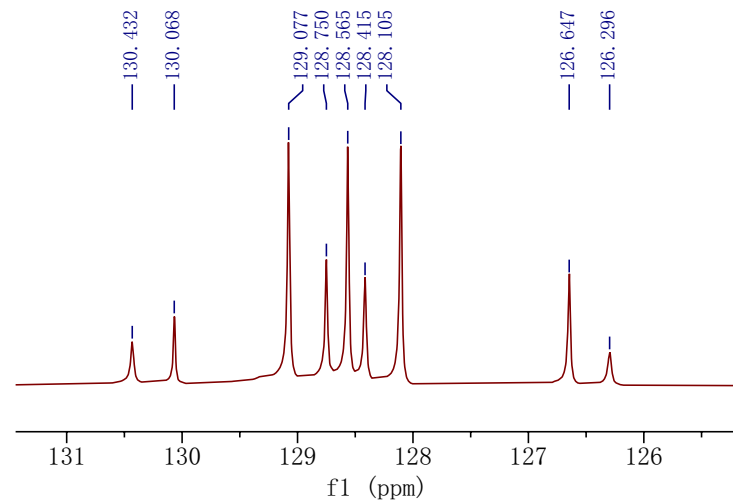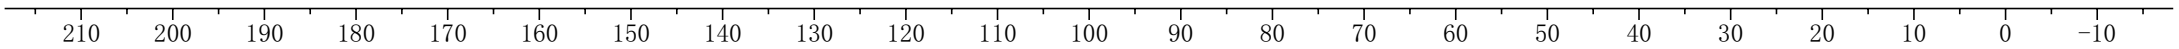

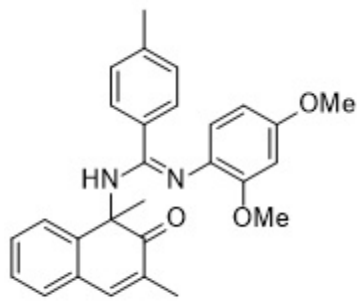

3al

7.739  
7.719  
7.312  
7.292  
7.260  
7.210  
7.196  
7.180  
7.161  
7.120  
6.992  
6.972

6.198

5.290

3.644

3.300

2.250

1.957

1.490

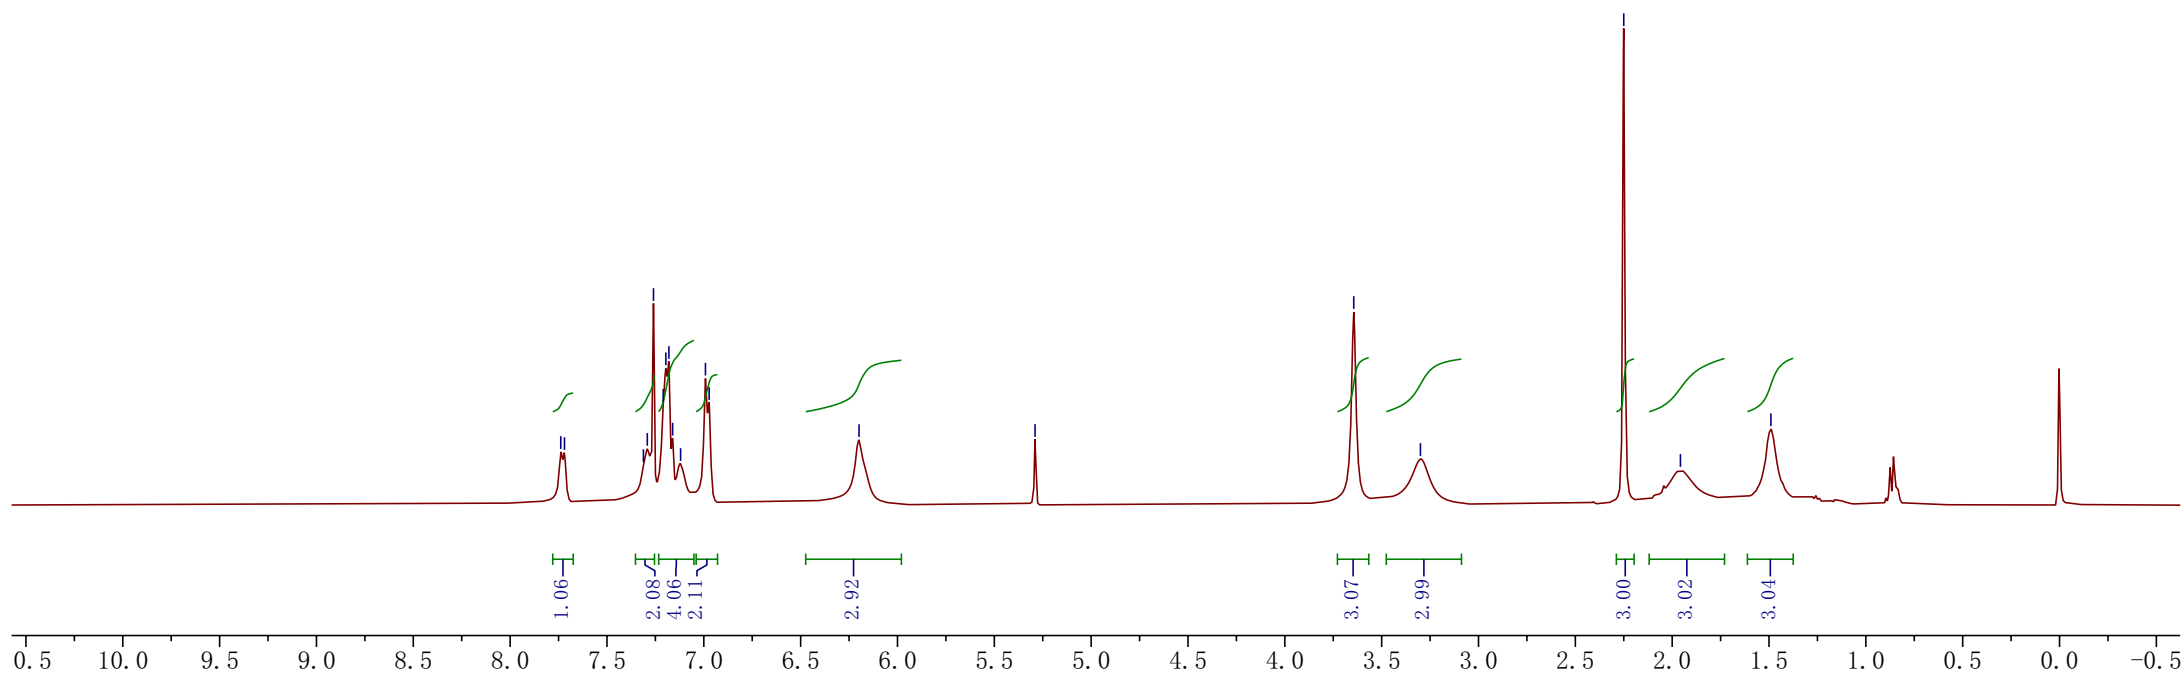

— 198.978

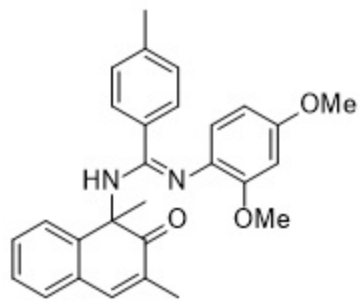

**3al**

— 154.933

— 151.982

— 146.723

— 138.476

— 131.794

— 129.837

— 128.206

— 128.057

— 127.448

— 126.139

— 124.279

— 104.822

— 100.532

— 61.555

— 55.630

— 54.940

— 40.147

— 39.937

— 39.730

— 39.524

— 39.312

— 39.103

— 38.894

— 27.809

— 20.808

— 16.234

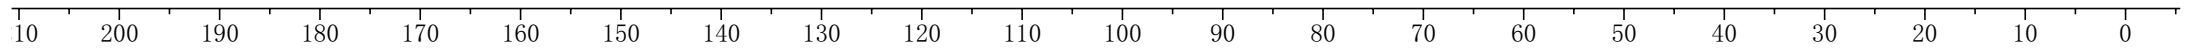

f1 (ppm)  
SI-87

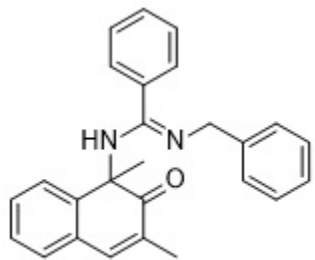

3am

7.706  
7.687  
7.374  
7.354  
7.335  
7.303  
7.284  
7.260  
7.240  
7.222  
7.035  
6.570

4.207  
4.166  
4.014  
3.974

1.983

1.430

0.074  
0.004

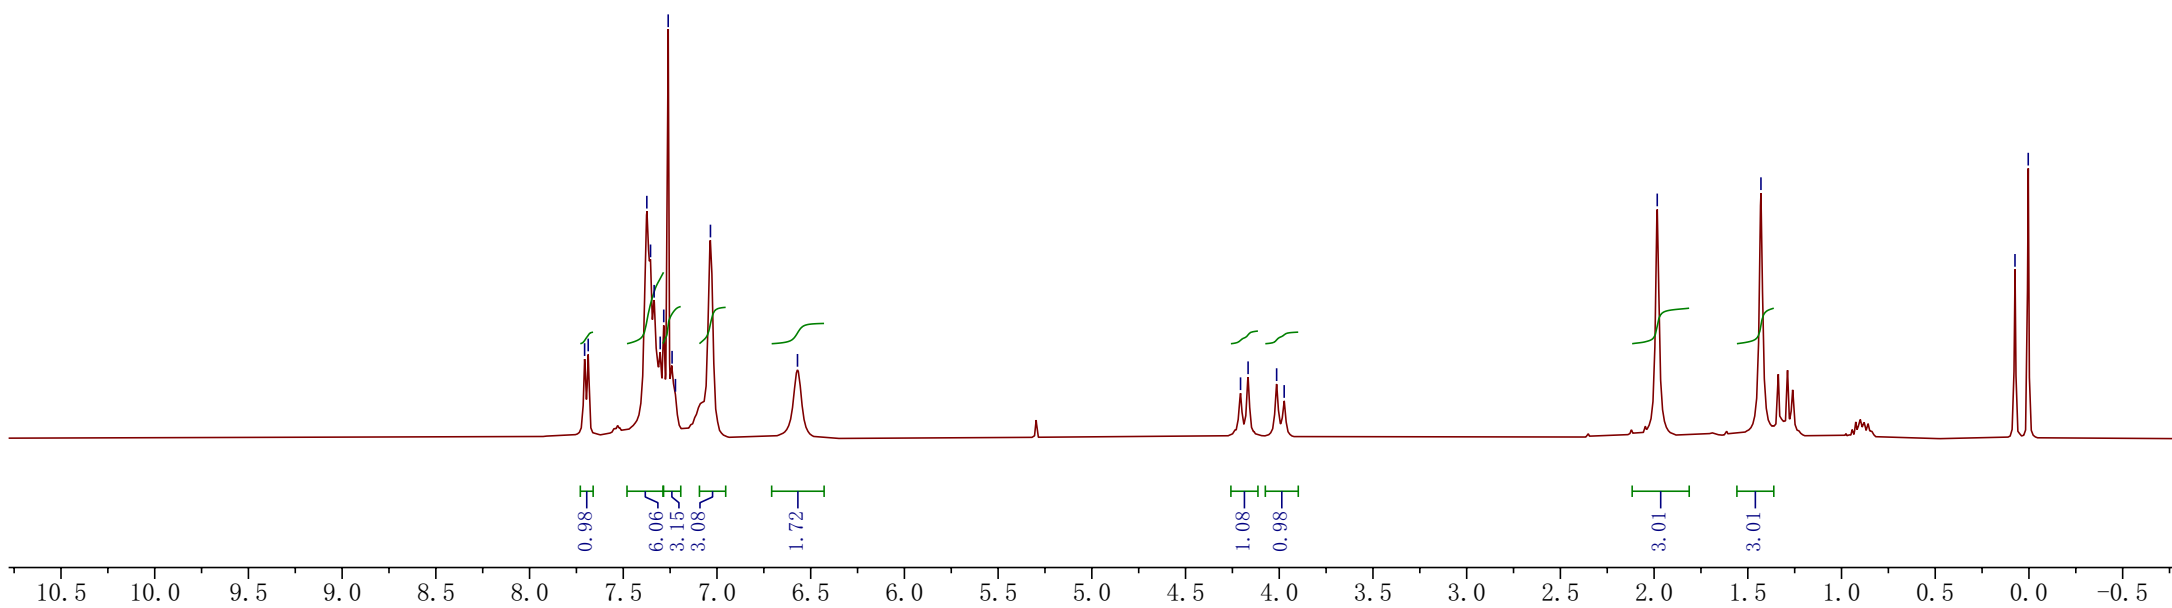

0.98

6.06

3.15

3.08

1.72

1.08

0.98

3.01

3.01



— 202.396

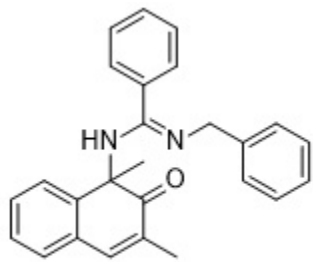

3am

— 156.737

— 146.279

— 141.953

— 138.924

— 133.622

— 132.299

— 130.238

— 129.410

— 128.846

— 128.518

— 128.139

— 127.820

— 127.753

— 126.625

— 126.504

— 125.603

— 124.574

— 77.478

— 77.160

— 76.842

— 62.957

— 52.718

— 28.614

— 16.457

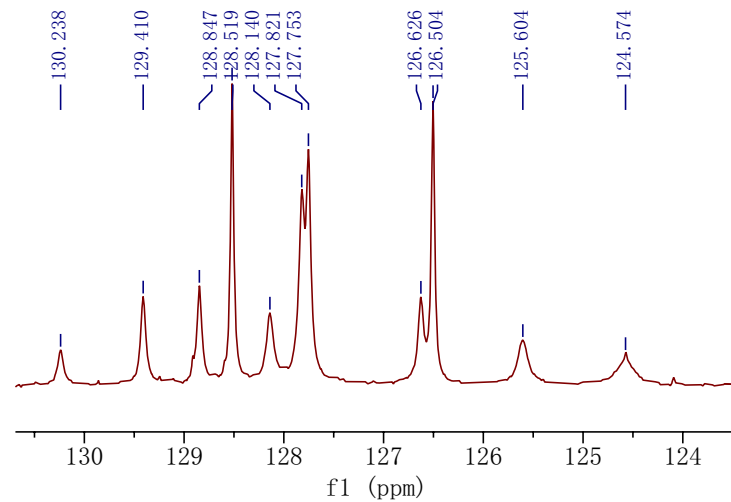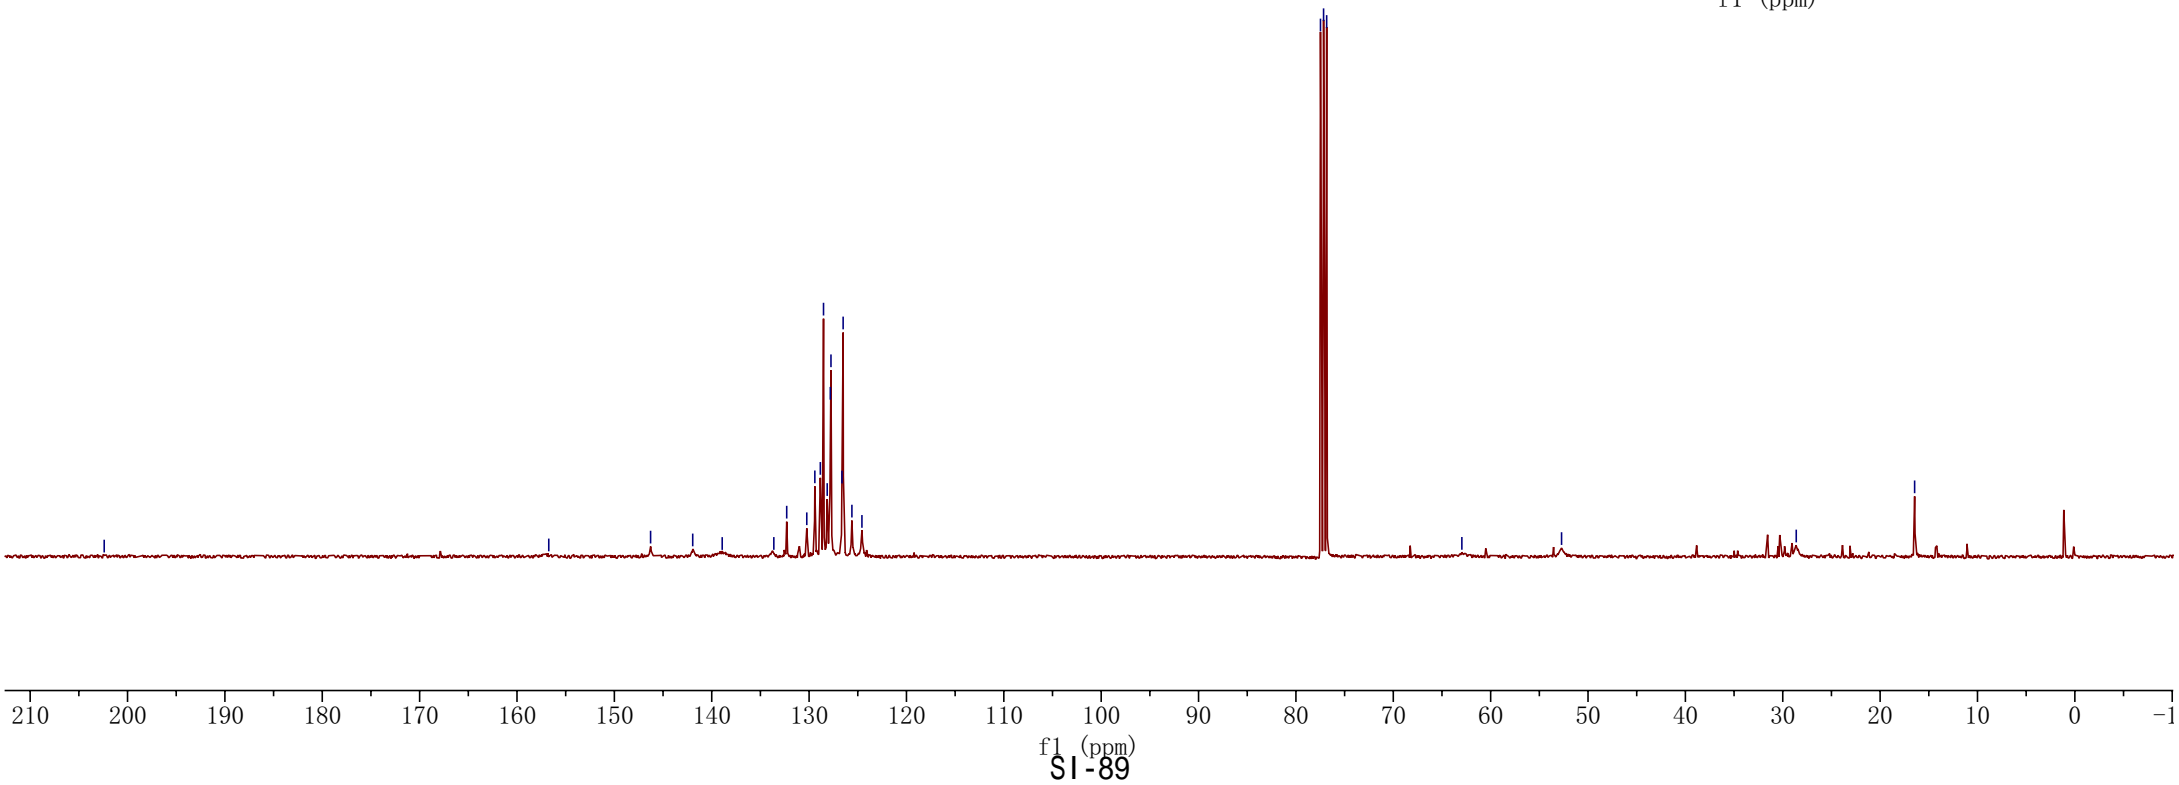

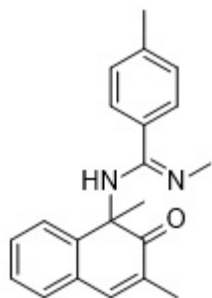

**3an**

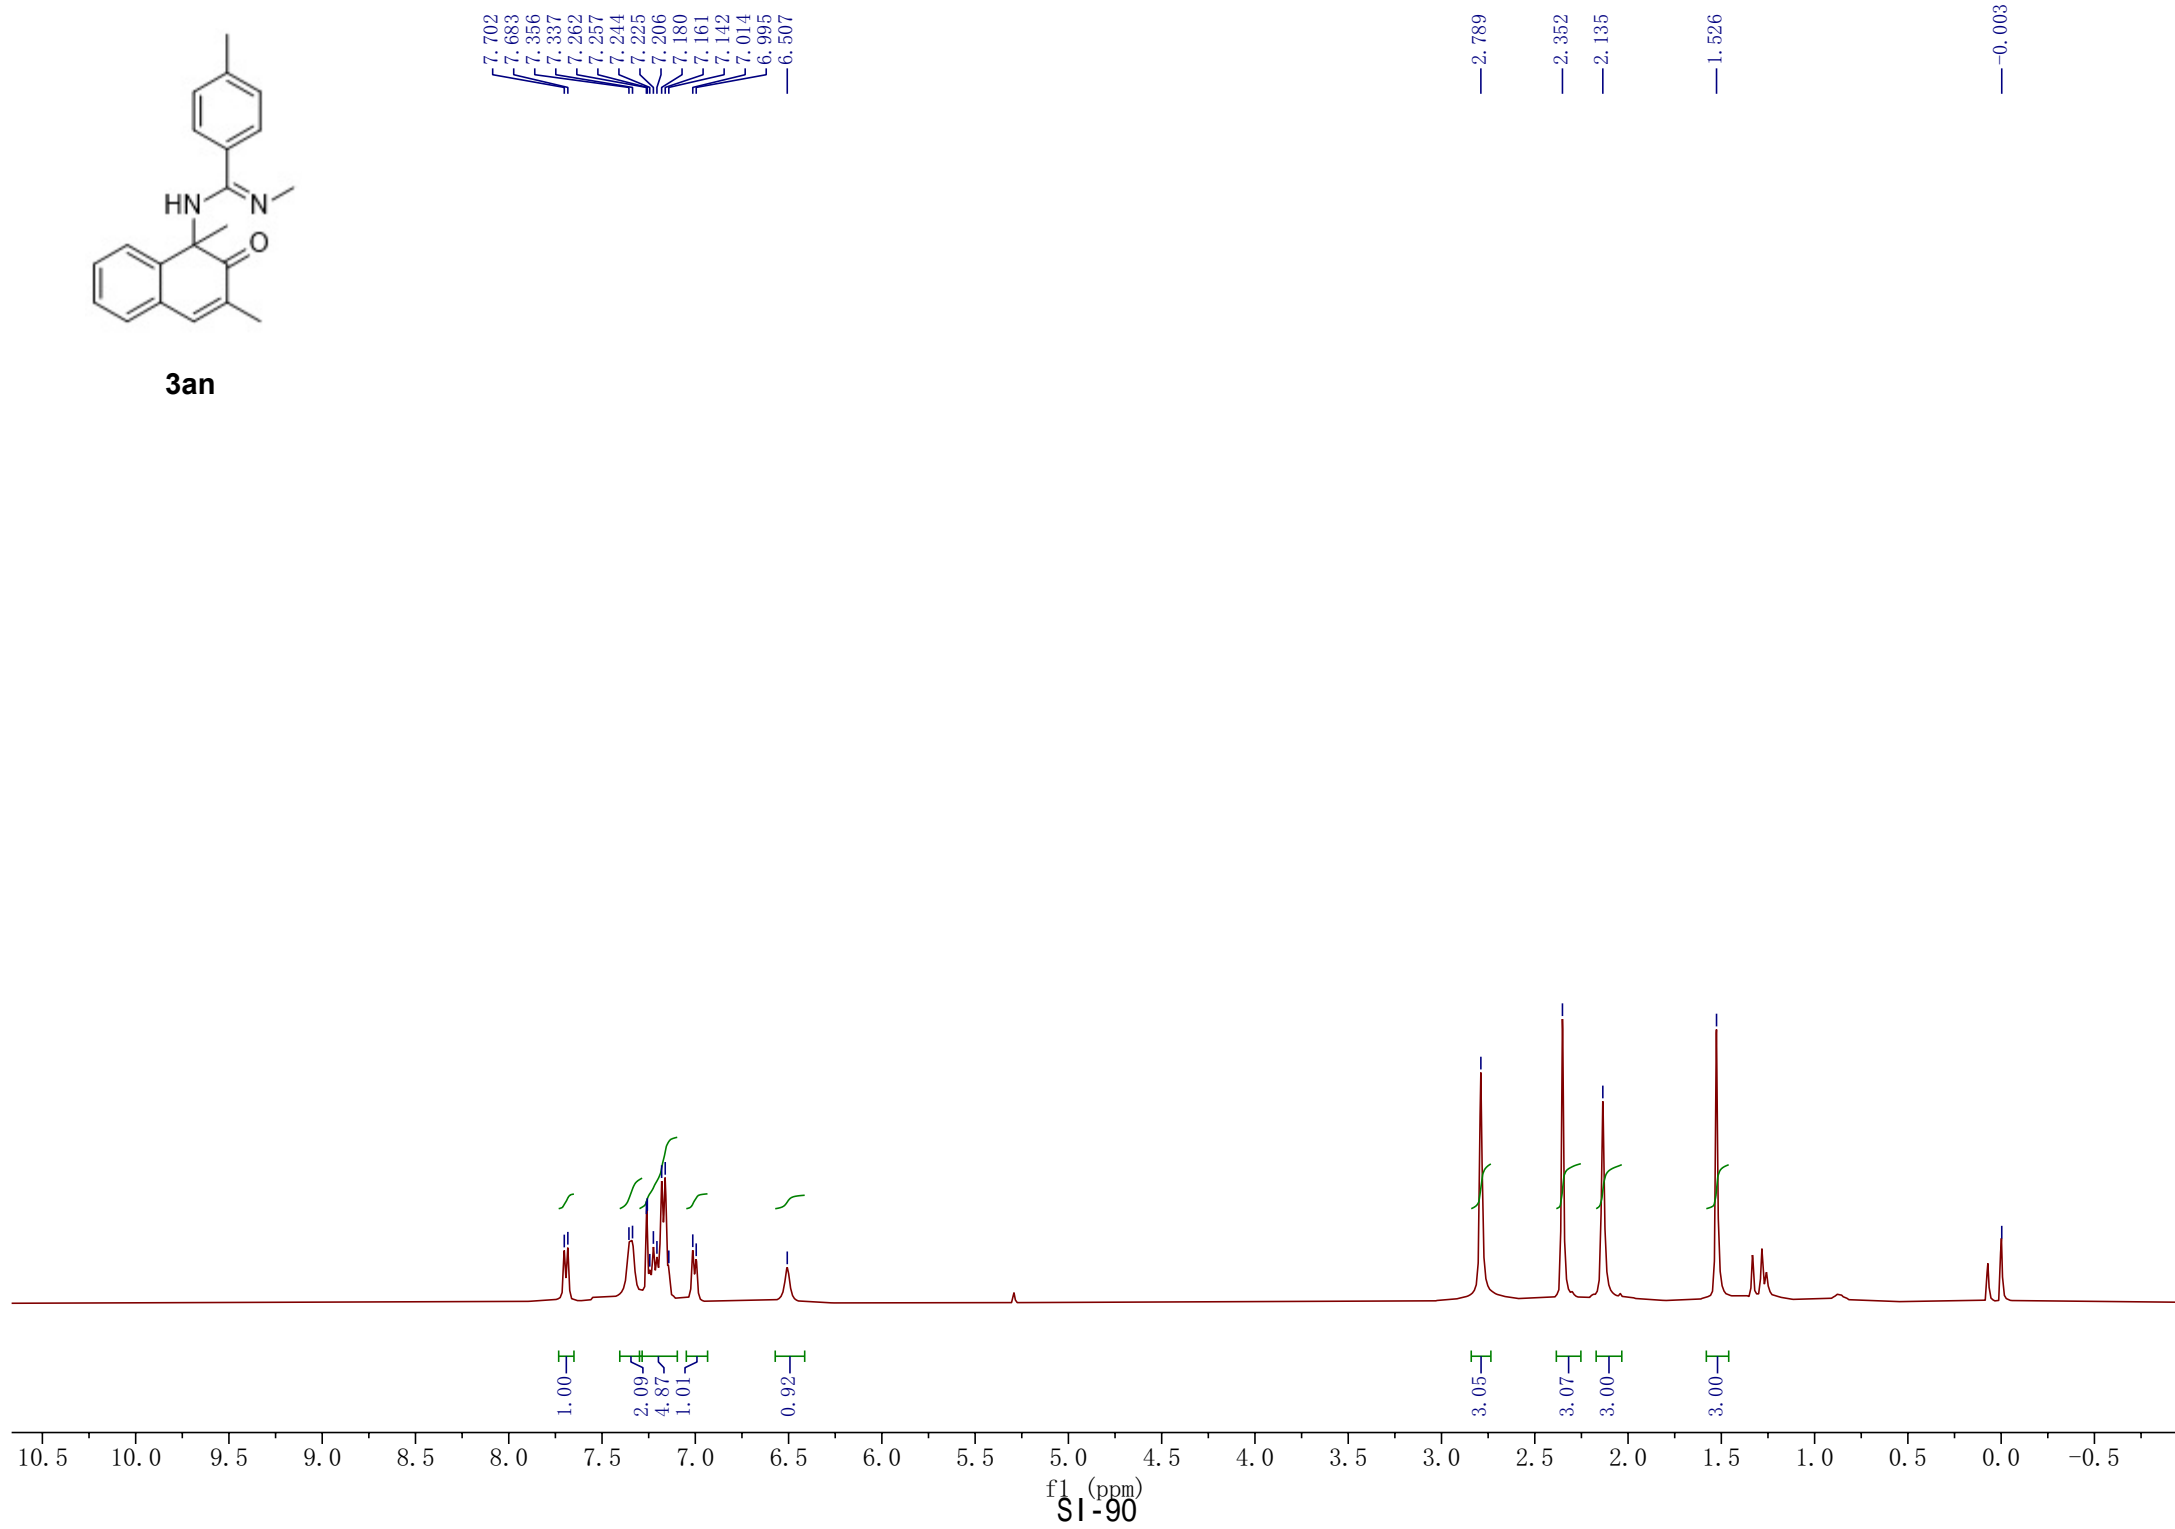

— 203.222

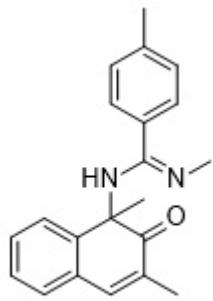

**3an**

— 163.970

— 142.688  
— 140.088  
— 131.879  
— 130.138  
— 128.991  
— 128.611  
— 128.039  
— 127.194  
— 126.824  
— 125.893

— 77.480  
— 77.162  
— 76.842  
— 71.520

— 30.654

— 23.688  
— 21.492  
— 18.560

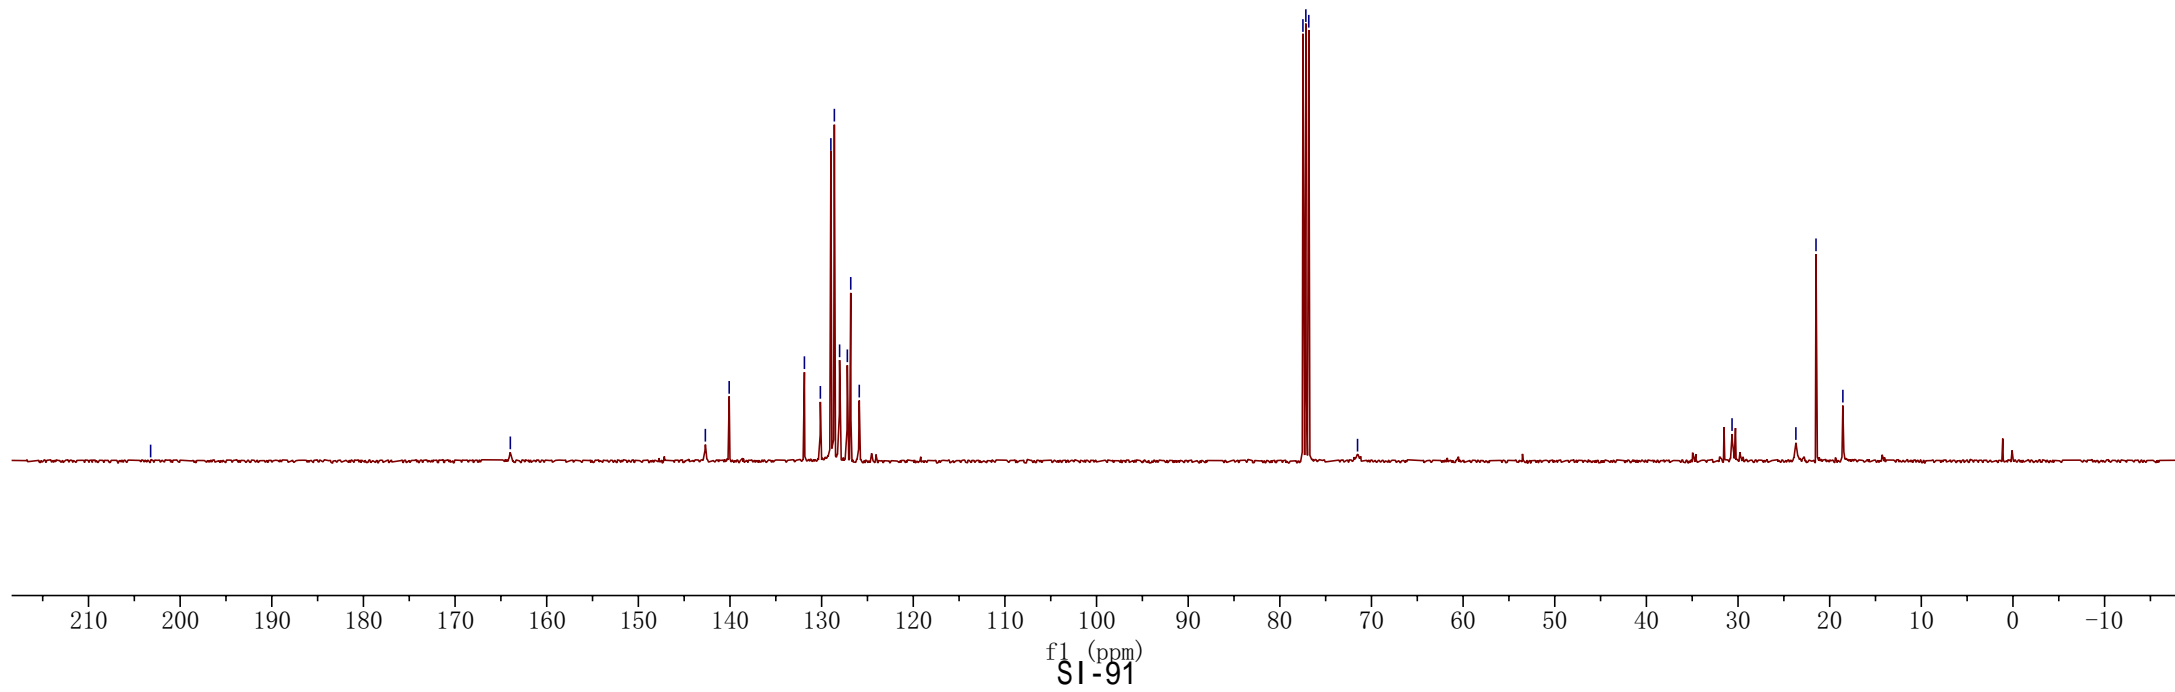

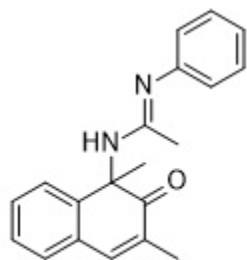

3ao

7.552  
7.533  
7.331  
7.312  
7.294  
7.259  
7.236  
7.217  
7.199  
7.180  
7.145  
7.080  
7.061  
7.042  
6.859  
6.841  
6.822  
6.305  
6.285

—2.001

—1.776

—1.416

—0.004

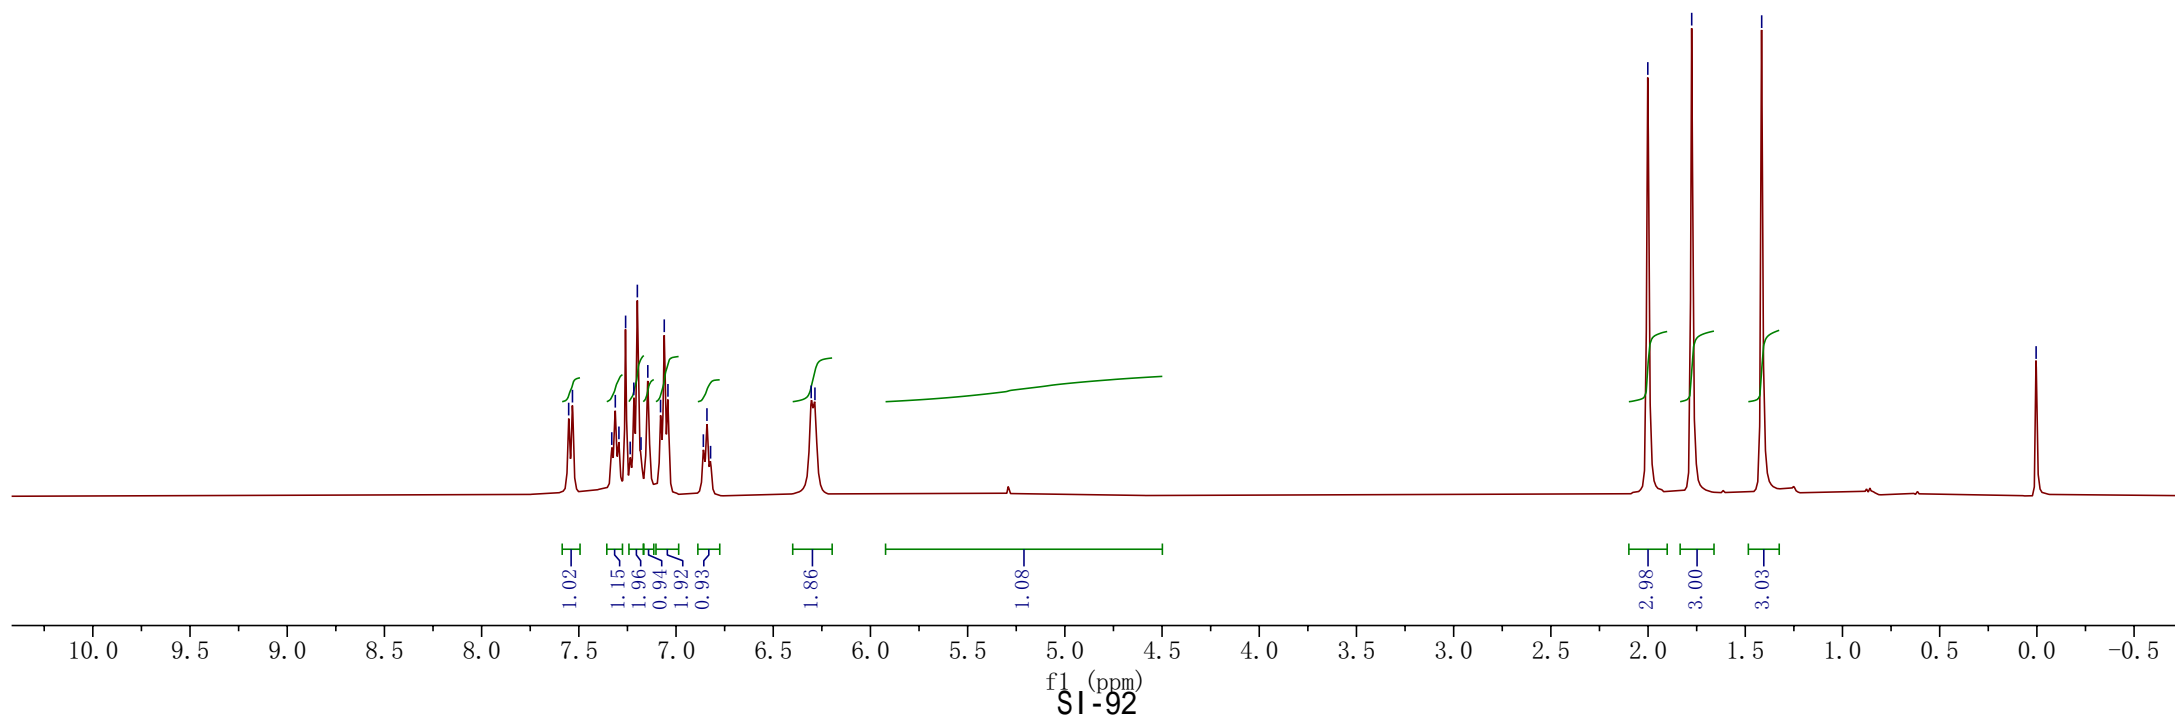

— 199.031

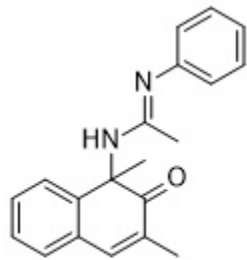

**3ao**

• ao

~ 152.420  
~ 149.888  
~ 146.148  
— 139.833  
— 132.141  
— 130.031  
— 128.638  
— 128.450  
— 128.230  
— 126.518  
— 124.146  
— 122.027  
— 121.846

~ 77.478  
~ 77.161  
~ 76.843

— 61.750

— 28.797

~ 16.279  
~ 16.252

— 0.111

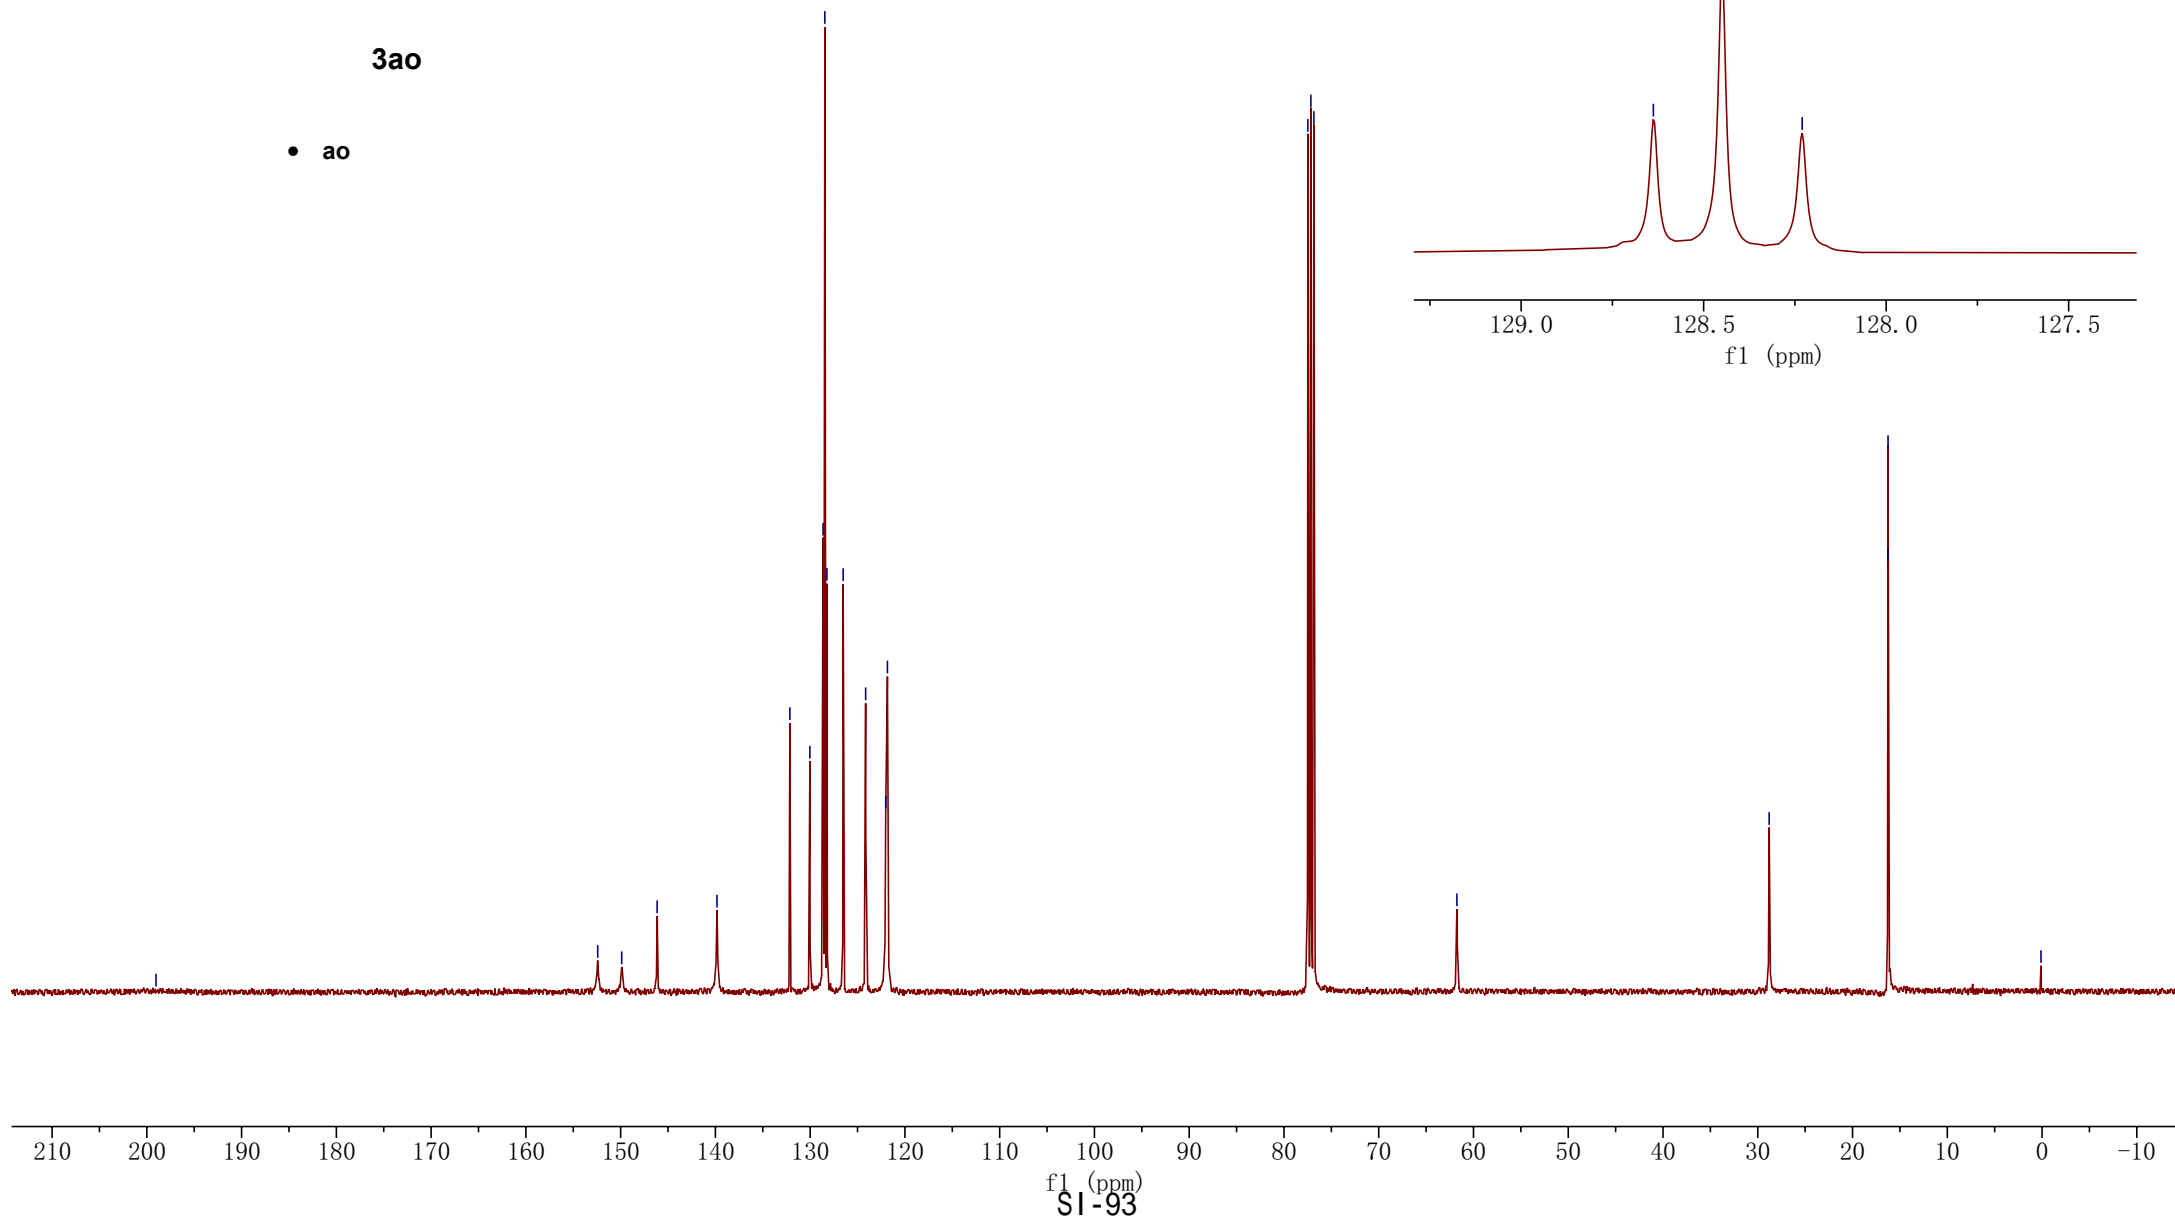

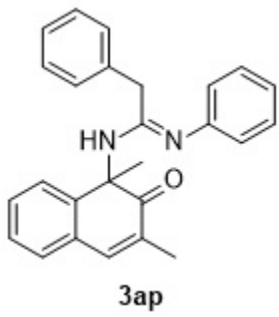

7.379  
7.360  
7.315  
7.297  
7.284  
7.276  
7.260  
7.244  
7.225  
7.210  
7.191  
7.165  
7.077  
7.058  
7.039  
6.853  
6.835  
6.816  
6.315  
6.296

5.118

3.529  
3.490  
3.462  
3.422

2.024

1.279

0.009

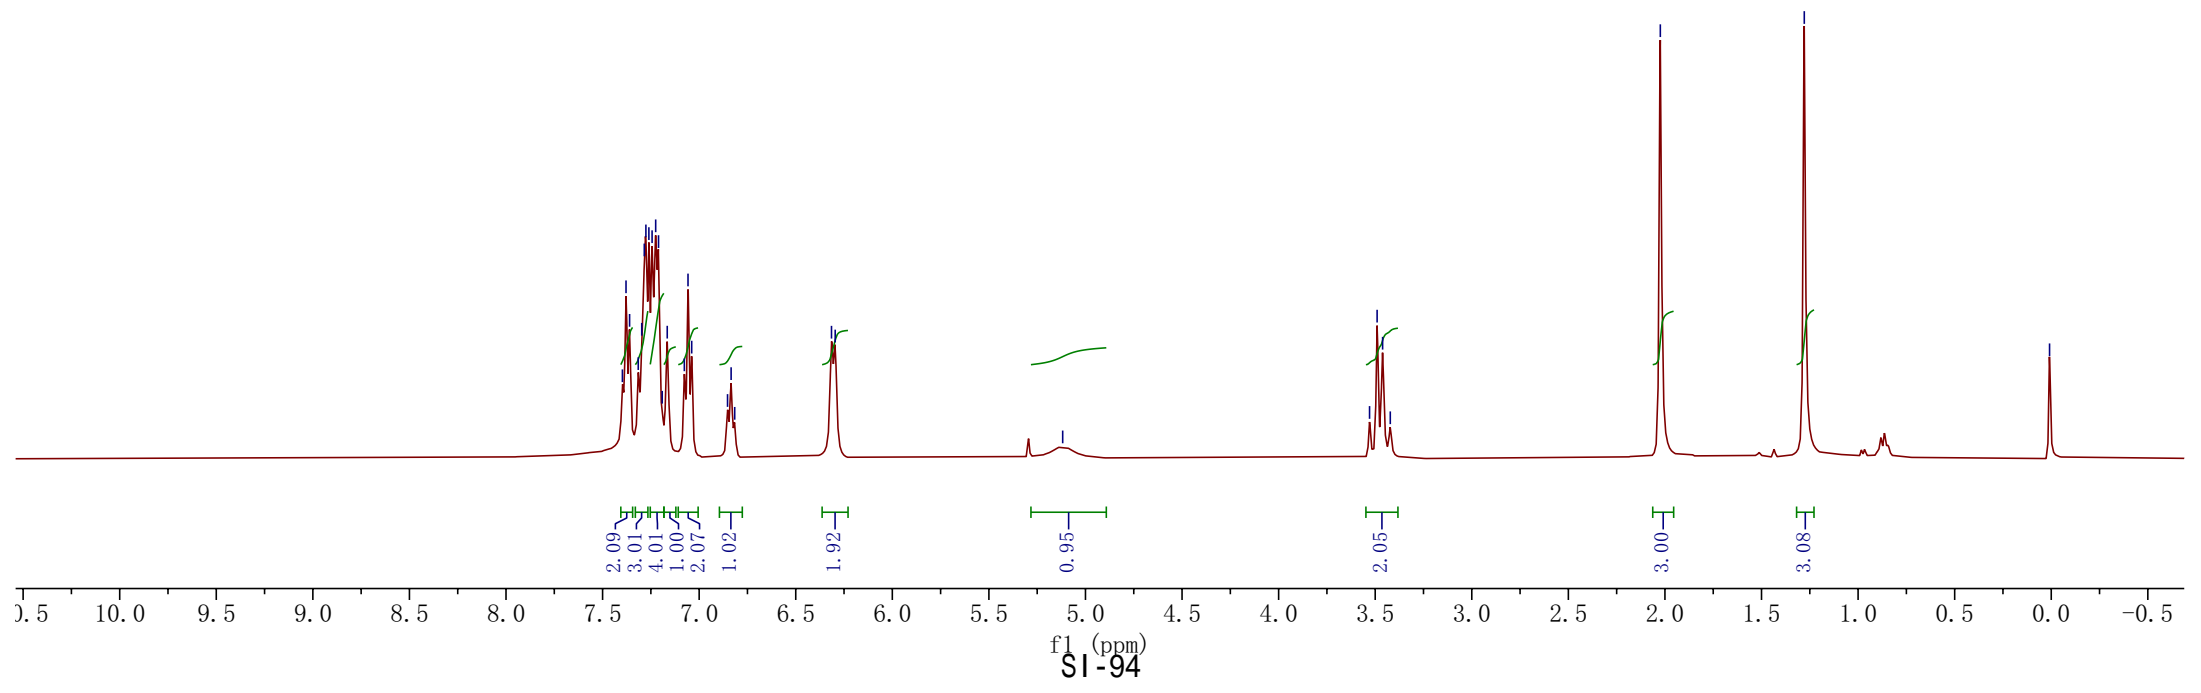

f1 (ppm)  
SI-94

— 200.612

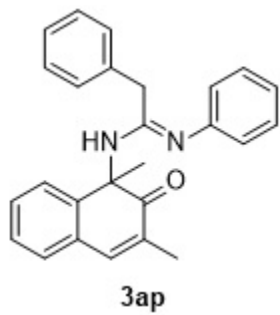

152.386  
149.885  
146.189  
140.079  
136.263  
132.225  
130.192  
129.182  
128.876  
128.533  
128.473  
128.188  
126.994  
126.516  
123.898  
121.952  
121.557

77.478  
77.160  
76.843

— 61.303

— 35.793

— 28.717

— 16.241

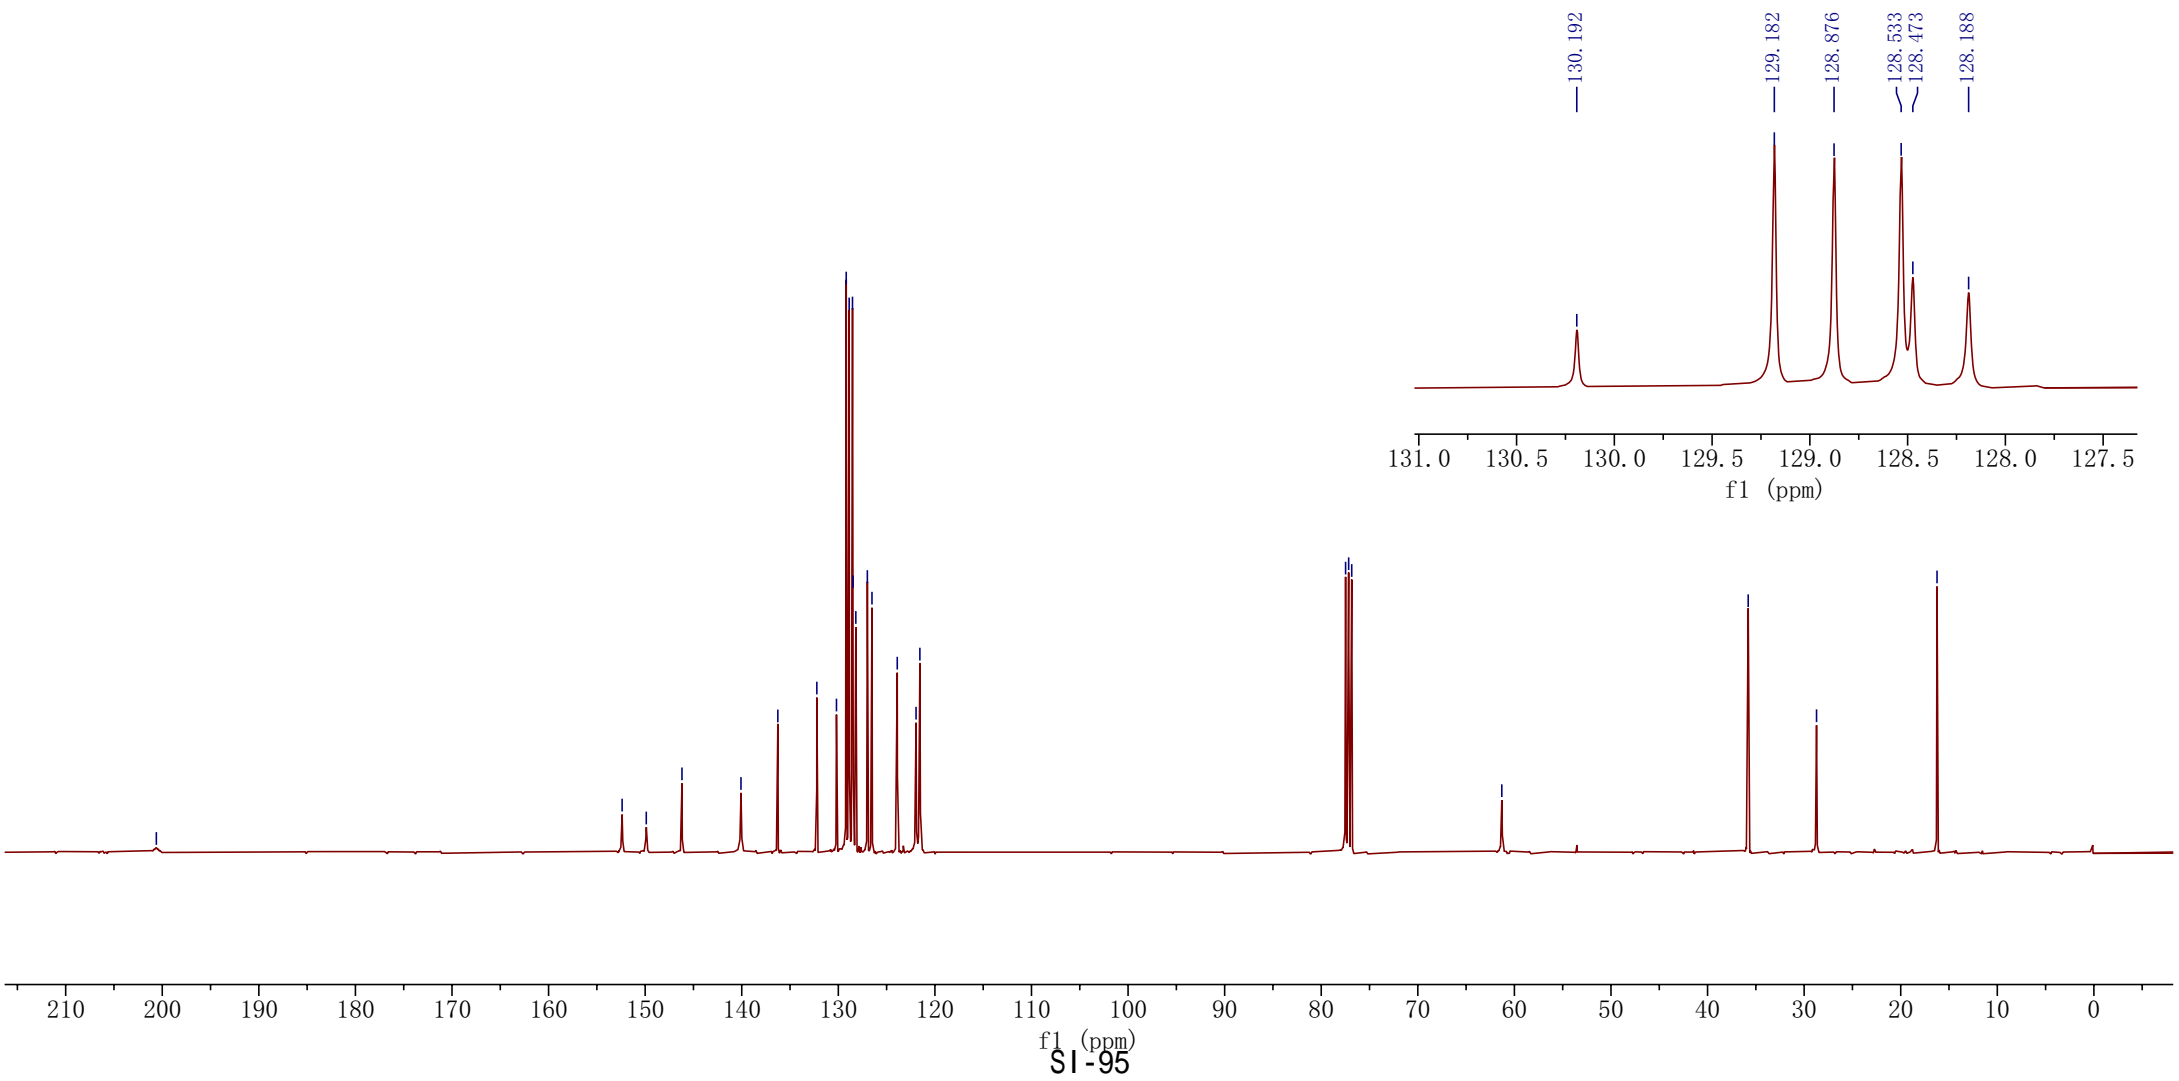

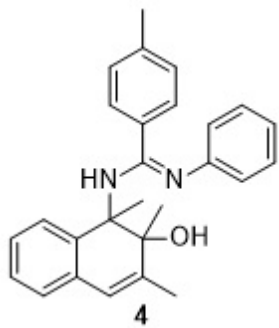

8.925  
7.565  
7.552  
7.545  
7.538  
7.530  
7.524  
7.322  
7.317  
7.302  
7.297  
7.261  
7.255  
7.234  
7.227  
7.220  
7.212  
7.206  
7.143  
7.123  
7.099  
7.094  
7.078  
7.060  
7.055  
7.031  
7.024  
7.017  
7.009  
7.003  
6.883  
6.865  
6.846  
6.737  
6.717  
6.056

5.387

2.336

2.054

1.833

1.313

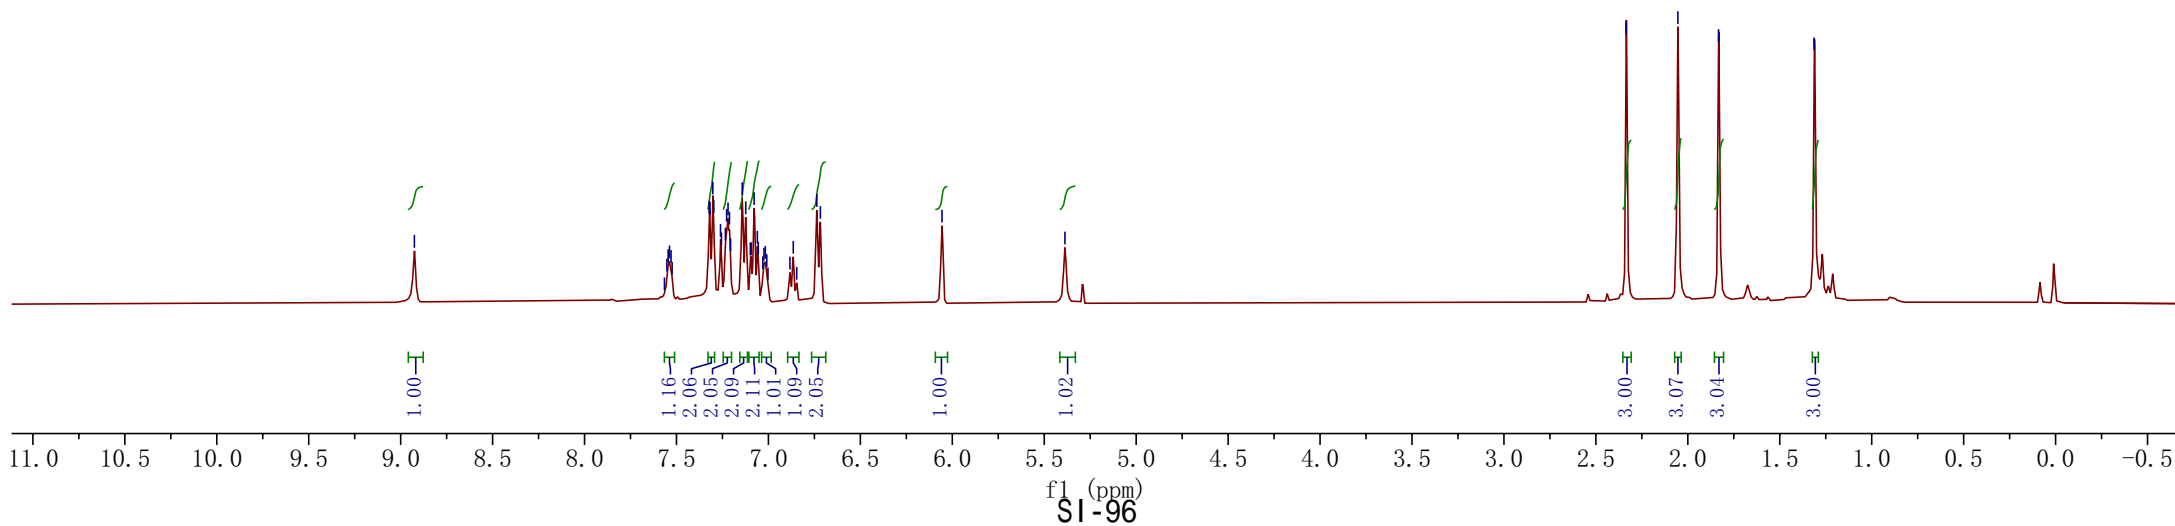



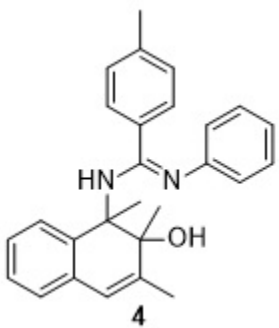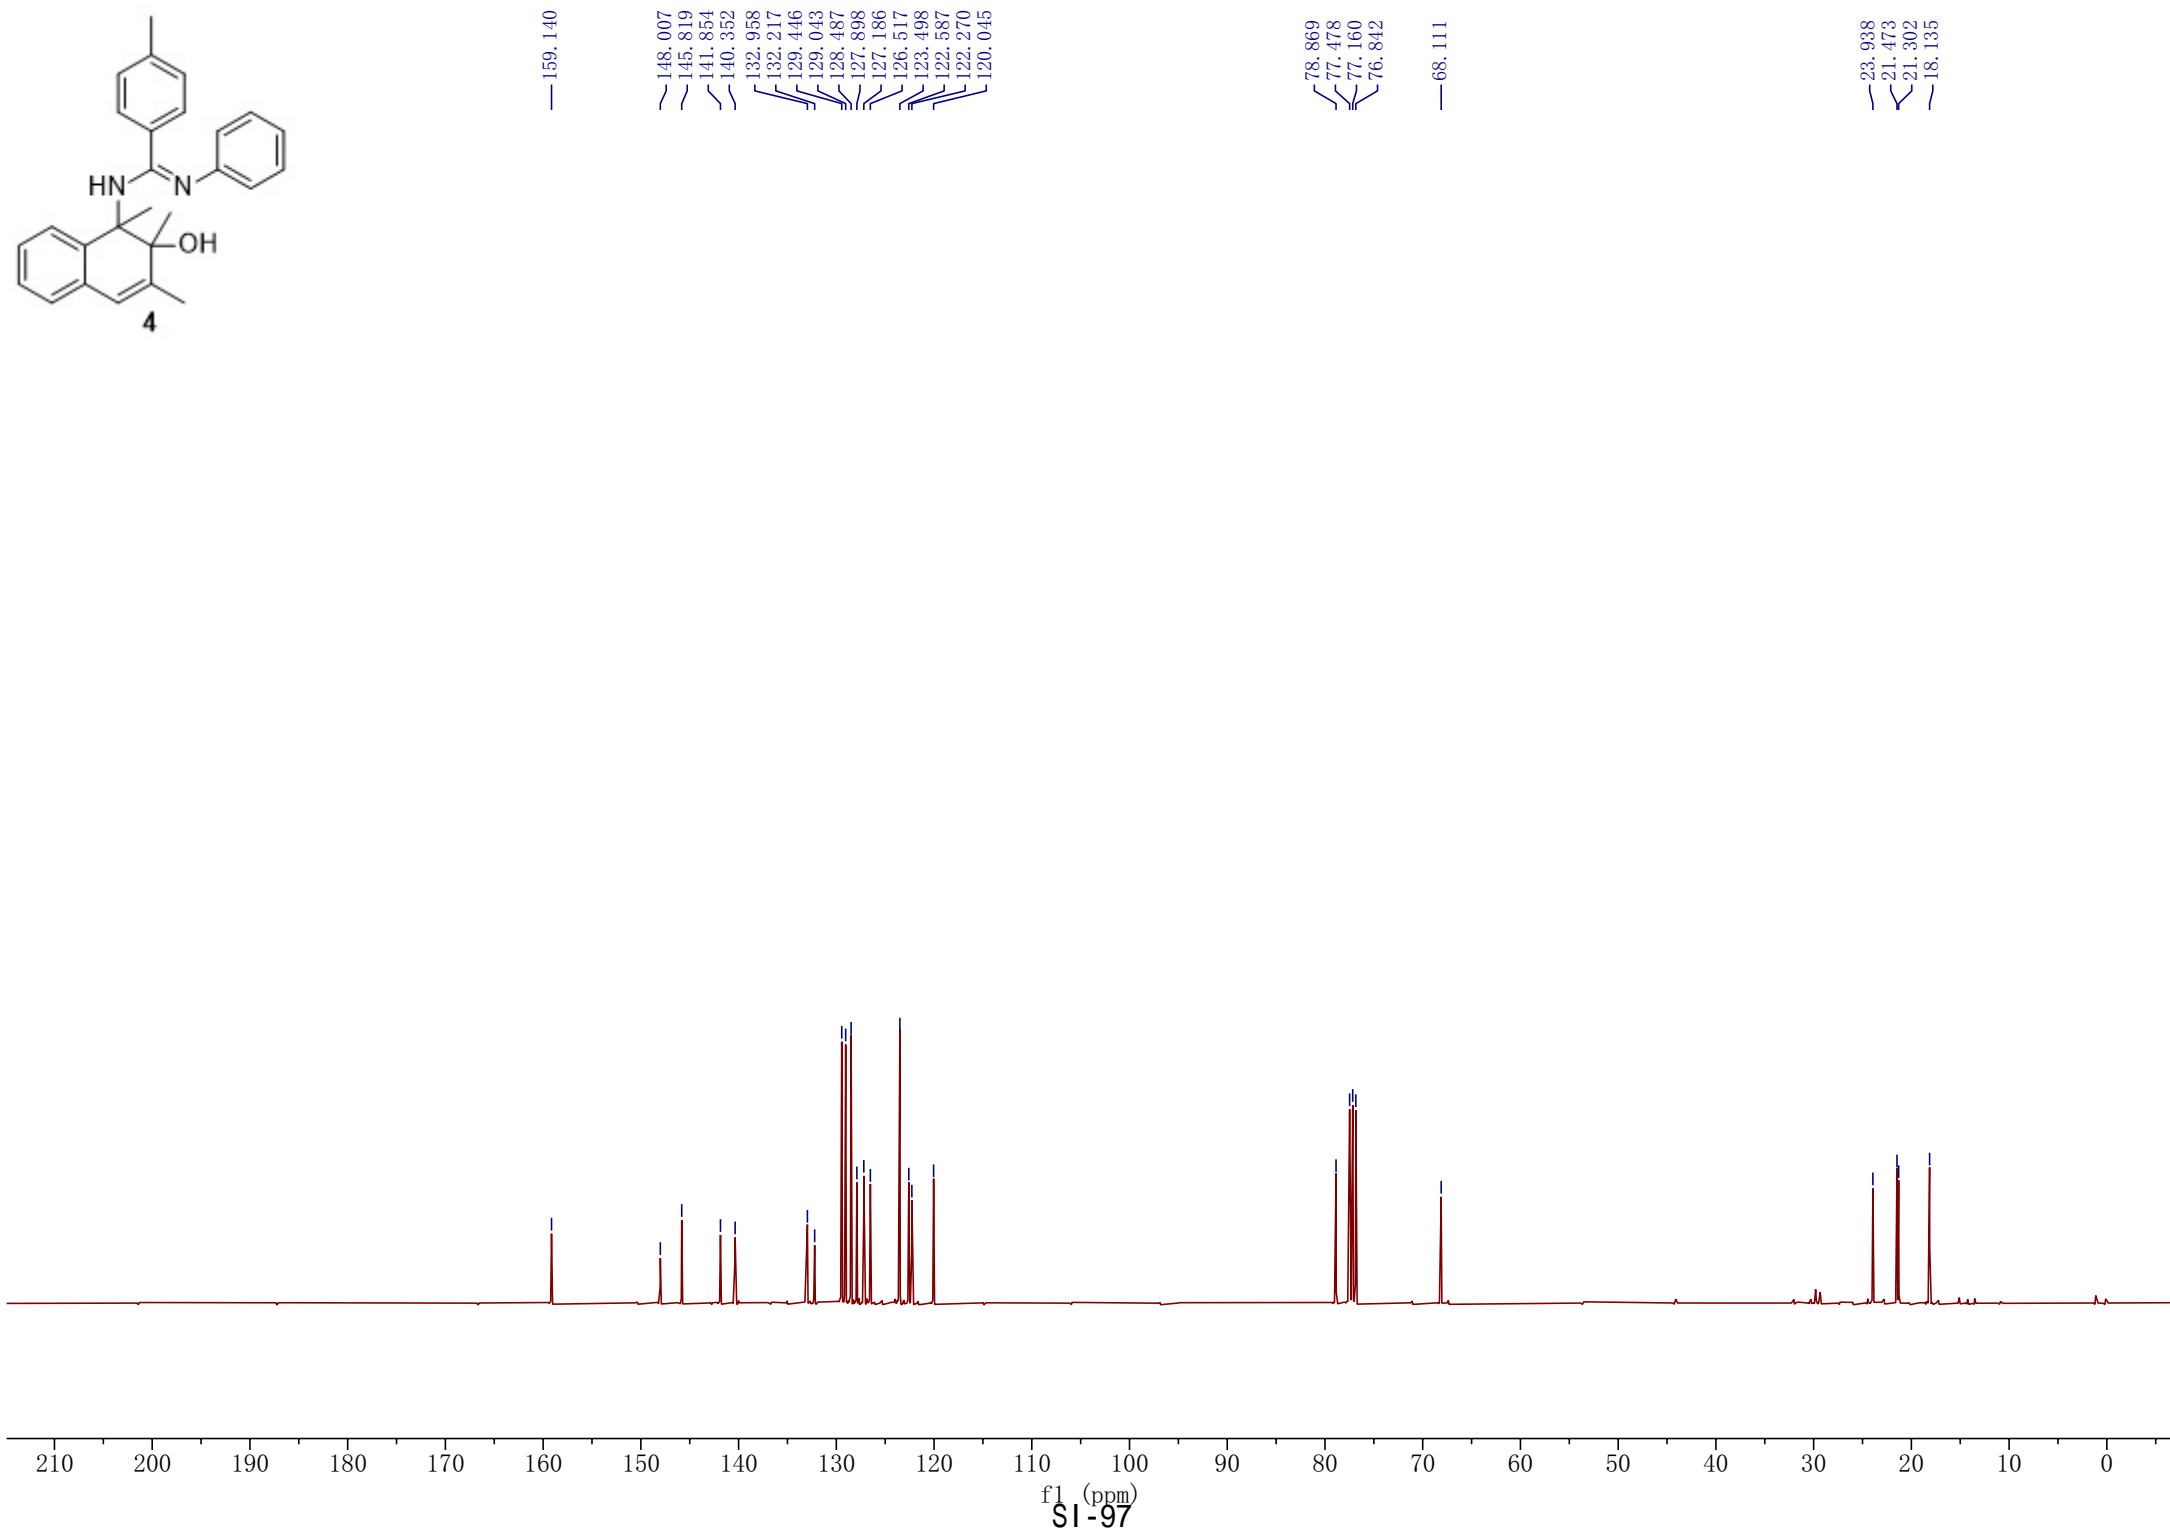

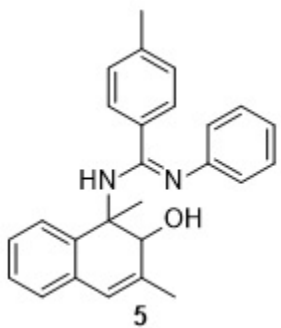

7.570  
7.559  
7.547  
7.281  
7.260  
7.239  
7.233  
7.226  
7.216  
7.176  
7.157  
7.138  
7.113  
7.095  
7.078  
7.059  
7.036  
7.025  
7.014  
6.880  
6.861  
6.843  
6.712  
6.675  
6.130

5.388  
5.291  
5.106

2.319  
2.056  
1.773

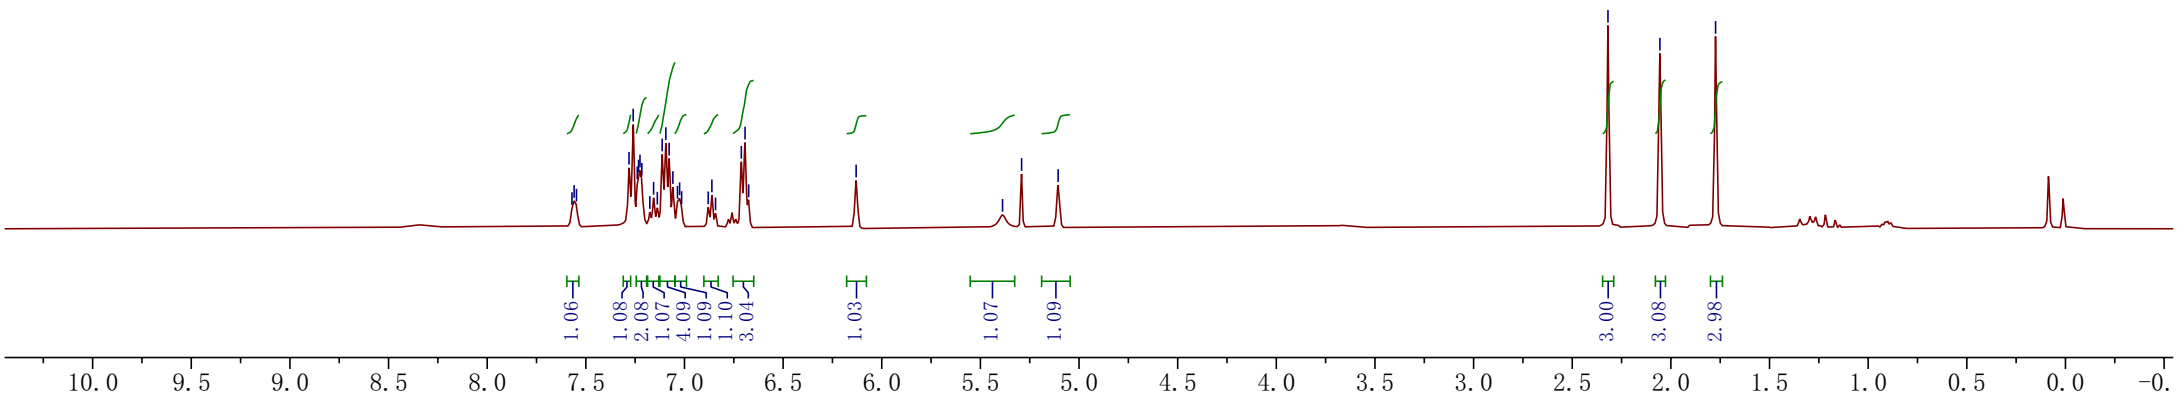

f1 (ppm)  
SI-98

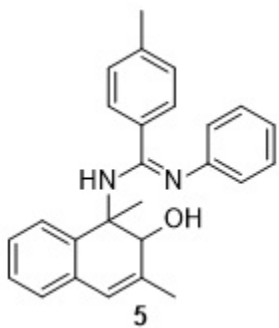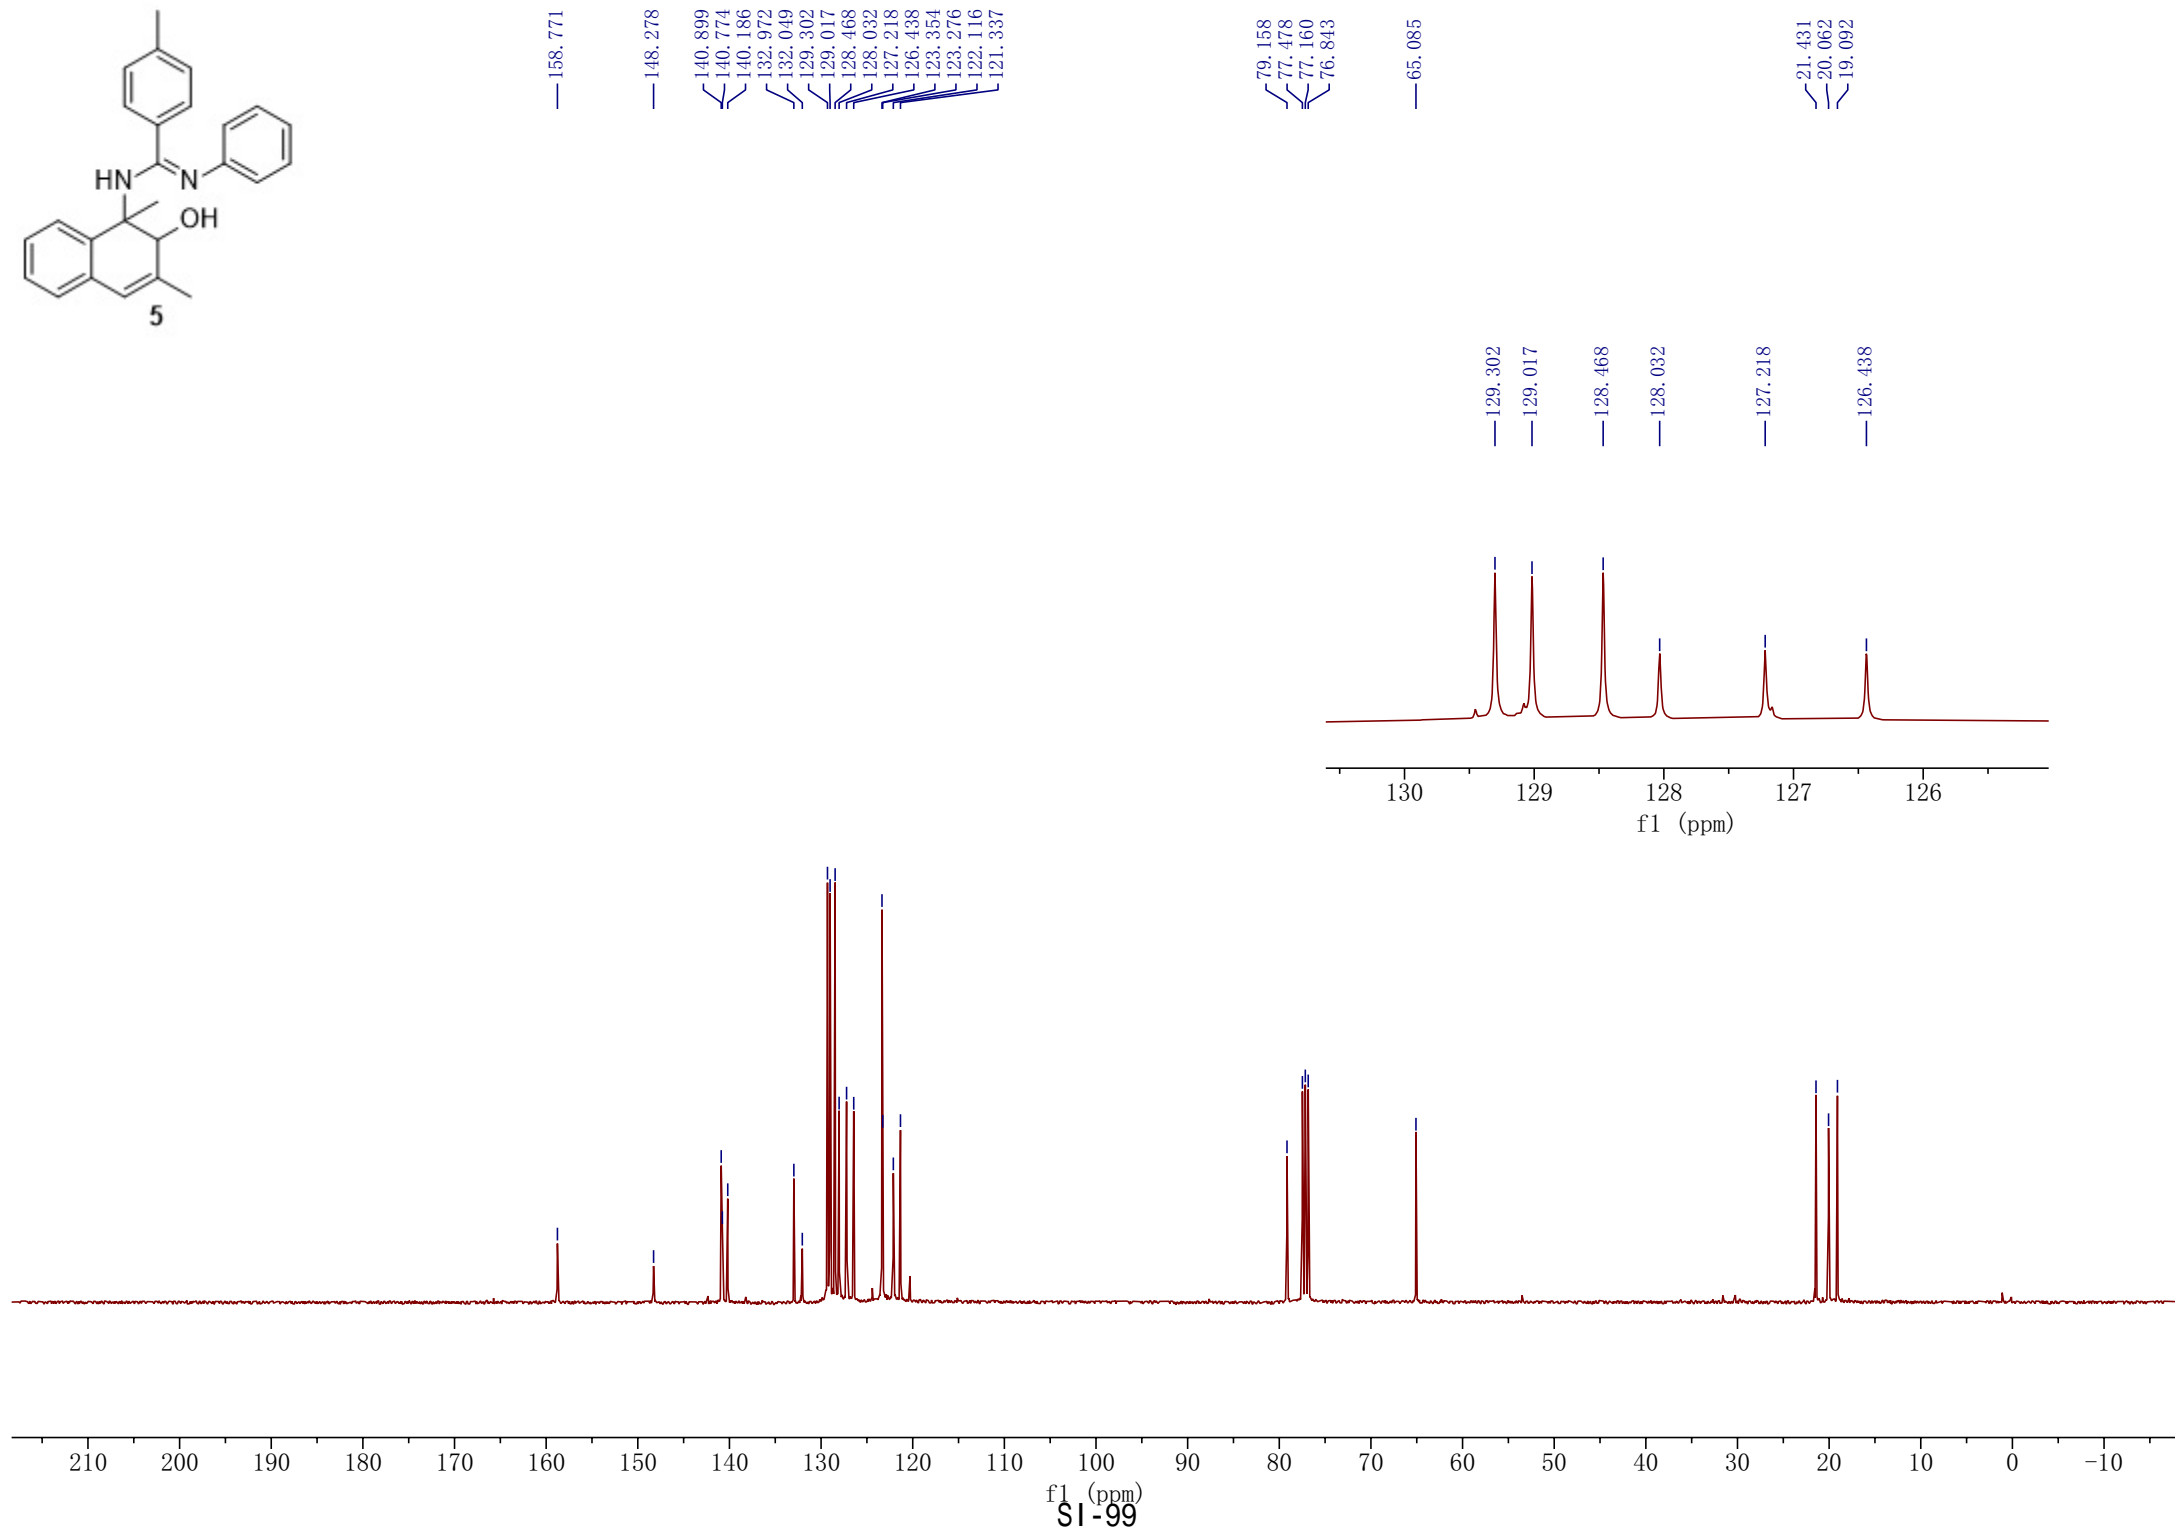

Supplement: d1qo01687c1.pdf [file d1qo01687c1.pdf]
